# Supplementary material
Source: Royal Society of Chemistry journal article supplement (doi:10.1039/d6ob00582a)

## Supporting Information

# Furan-2-Carboxamides as Dienes in Cascade $S_N2'$ /Intramolecular Diels-Alder Reaction with MBH Carbonates

Yang Zhang,<sup>a</sup> Yuhan Li,<sup>a</sup> Zhonglin Wei,<sup>b</sup> Zhuoqi Zhang,<sup>a</sup> Jinbao Xiang,<sup>a</sup> Lianyou Zheng<sup>\*a</sup>

<sup>a</sup> The Center for Combinatorial Chemistry and Drug Discovery of Jilin University, The School of Pharmaceutical Sciences, Jilin University, 1266 Fujin Road, Changchun, Jilin 130021, P. R. China. E-mail: lianyouzh@jlu.edu.cn

<sup>b</sup> College of Chemistry, Jilin University, Changchun 130012, P. R. China

### Table of Contents

|                                                                        |    |
|------------------------------------------------------------------------|----|
| I. General Information.....                                            | 2  |
| II. Preparation of Starting Materials.....                             | 3  |
| III. Experimental Procedure and Characterization Data of Products..... | 10 |
| IV. Control experiments.....                                           | 30 |
| V. Gram-scale synthesis and chemical transformations.....              | 32 |
| VI. X-ray crystallographic data for compound 4c (CCDC:2516694).....    | 36 |
| VII. Computational Details.....                                        | 38 |
| VIII. References.....                                                  | 55 |
| IX. NMR Spectra.....                                                   | 58 |

## I. General Information.

Unless otherwise noted, all reagents and solvents were used as supplied by commercial sources without further purification. Chromatography was carried on flash silica gel (200–300 mesh). All reactions were monitored by TLC on silica gel 60 (F<sub>254</sub>) aluminum plates, visualized under UV light (254 or 365 nm). Melting points were measured using a SGW X-4 apparatus and were uncorrected. NMR spectra were recorded on a Varian spectrometer operating at 400 MHz for <sup>1</sup>H NMR and 101 MHz for <sup>13</sup>C NMR using CDCl<sub>3</sub> or DMSO-*d*<sub>6</sub> as solvents. Chemical shifts ( $\delta$ ) are reported in parts per million (ppm) relative to tetramethylsilane (TMS) as an internal standard. Multiplicities are indicated as follows: s = singlet; d = doublet; t = triplet; q = quartet; m = multiplet; dd = doublet of doublets; dt = doublet of triplets; brs = broad singlet. Coupling constant (Hz) (*J* values) are reported in Hertz (Hz). High-resolution mass spectra (HRMS) were acquired on a quadrupole time-of-flight (Q-TQF) mass spectrometer using electrospray ionization (ESI) positive ionization source.

## II. Preparation of Starting Materials

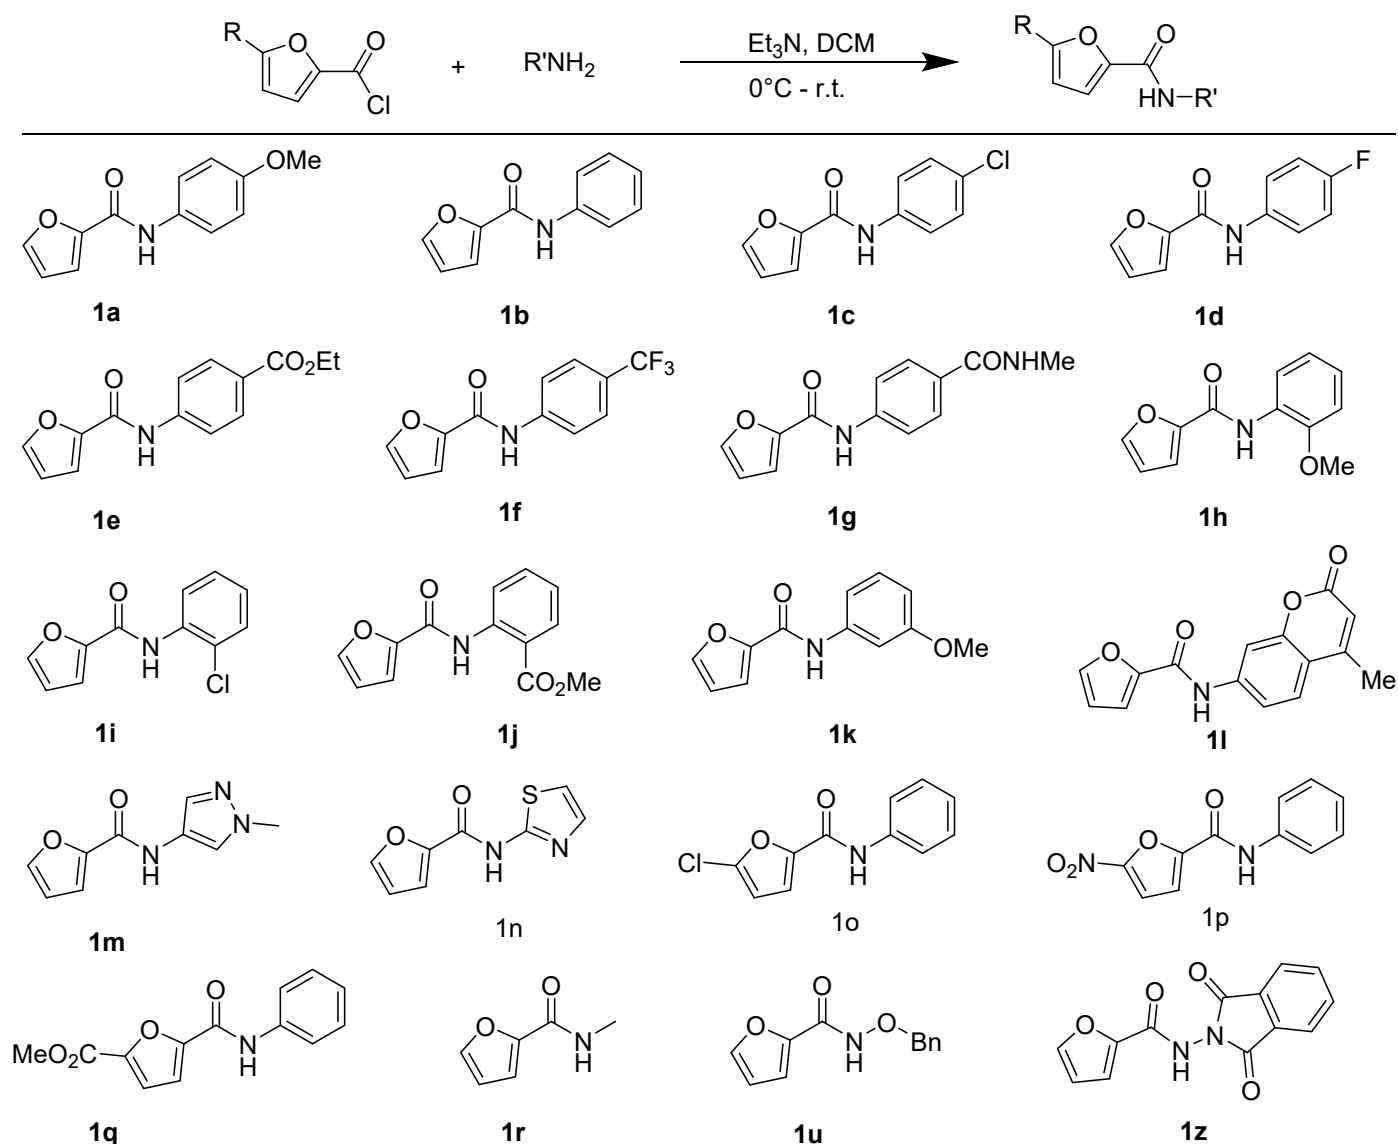

**General Procedure A:**<sup>[1]</sup> A solution of the appropriate amine (10 mmol) and Et<sub>3</sub>N (1.52 mL, 11 mmol) in dichloromethane (10 mL) was cooled in an ice-water bath and stirred vigorously. 2-Furoyl chloride (11 mmol) in dichloromethane (5 mL) was added dropwise over 1 h. The reaction mixture was then allowed to warm to room temperature and stirred for 4 h. After quenching with water (50 mL), the organic layer was separated and the aqueous phase was extracted with dichloromethane (3 × 5 mL). The combined extracts were washed with saturated NaHCO<sub>3</sub> (2 × 15 mL) and brine (2 × 15 mL), dried over Na<sub>2</sub>SO<sub>4</sub> and concentrated to dryness. The crude product was recrystallized or purified by column chromatography on silica gel to afford the pure amide.

Substrates **1a** – **1r**, **1u** and **1z** were prepared according to General Procedure A.

*N*-(4-Methoxyphenyl)furan-2-carboxamide (**1a**) [2]

White solid (1.74 g, 80%), m.p.: 108.3–109.0 °C; <sup>1</sup>H NMR (400 MHz, CDCl<sub>3</sub>) δ 7.99 (s, 1H), 7.59 – 7.52 (m, 2H), 7.50 (s, 1H), 7.22 (d, *J* = 3.5 Hz, 1H), 6.94 – 6.86 (m, 2H), 6.55 (dd, *J* = 3.6, 1.7 Hz, 1H), 3.81 (s, 3H).

*N*-Phenylfuran-2-carboxamide (**1b**) [2]

White solid (1.57 g, 84%), m.p.: 124.7–125.1 °C; <sup>1</sup>H NMR (400 MHz, CDCl<sub>3</sub>) δ 8.08 (s, 1H), 7.65 (d, *J* = 7.9 Hz, 2H), 7.51 (d, *J* = 1.8 Hz, 1H), 7.37 (t, *J* = 7.8 Hz, 2H), 7.24 (d, *J* = 3.6 Hz, 1H), 7.15 (t, *J* = 7.4 Hz, 1H), 6.56 (dd, *J* = 3.7, 1.7 Hz, 1H).

*N*-(4-Chlorophenyl)furan-2-carboxamide (**1c**) [2]

White solid (1.81 g, 82%), m.p.: 150.8–151.3 °C; <sup>1</sup>H NMR (400 MHz, CDCl<sub>3</sub>) δ 8.08 (s, 1H), 7.65 – 7.57 (m, 2H), 7.52 (d, *J* = 1.8 Hz, 1H), 7.36 – 7.29 (m, 2H), 7.25 (d, *J* = 3.5 Hz, 1H), 6.57 (dd, *J* = 3.6, 1.9 Hz, 1H).

*N*-(4-Fluorophenyl)furan-2-carboxamide (**1d**) [3]

White solid (1.62 g, 79%), m.p.: 102.9–103.7 °C; <sup>1</sup>H NMR (400 MHz, CDCl<sub>3</sub>) δ 8.06 (s, 1H), 7.65 – 7.58 (m, 2H), 7.54 – 7.49 (m, 1H), 7.24 (d, *J* = 3.3 Hz, 1H), 7.06 (t, *J* = 8.7 Hz, 2H), 6.57 (dd, *J* = 3.4, 1.7 Hz, 1H).

Ethyl 4-(furan-2-carboxamido)benzoate (**1e**) [1]

White solid (2.05 g, 79%), m.p.: 130.7–131.3 °C; <sup>1</sup>H NMR (400 MHz, CDCl<sub>3</sub>) δ 8.23 (s, 1H), 8.06 (d, *J* = 8.7 Hz, 2H), 7.74 (d, *J* = 8.7 Hz, 2H), 7.55 – 7.52 (m, 1H), 7.28 (d, *J* = 3.5 Hz, 1H), 6.59 (dd, *J* = 3.4, 1.7 Hz, 1H), 4.37 (q, *J* = 7.1 Hz, 2H), 1.40 (t, *J* = 7.1 Hz, 3H).

*N*-(4-(Trifluoromethyl)phenyl)furan-2-carboxamide (**1f**) [4]

White solid (2.01 g, 79%), m.p.: 152.3–153.1 °C; <sup>1</sup>H NMR (400 MHz, CDCl<sub>3</sub>) δ 8.20 (s, 1H), 7.79 (d, *J* = 8.5 Hz, 2H), 7.62 (d, *J* = 8.6 Hz, 2H), 7.56 – 7.52 (m, 1H), 7.29 (d, *J* = 3.5 Hz, 1H), 6.59 (dd, *J* = 3.5, 1.7 Hz, 1H).

*N*-(4-(Methylcarbamoyl)phenyl)furan-2-carboxamide (**1g**)

White solid (1.61 g, 66%), m.p.:223.3-223.7 °C; <sup>1</sup>H NMR (400 MHz, DMSO-*d*<sub>6</sub>) δ 10.38 (s, 1H), 8.40 – 8.31 (m, 1H), 7.97 (s, 1H), 7.83 (m, 4H), 7.38 (d, *J* = 3.2 Hz, 1H), 6.76 – 6.69 (m, 1H), 2.78 (d, *J* = 4.1 Hz, 3H). <sup>13</sup>C NMR (101 MHz, DMSO-*d*<sub>6</sub>) δ 166.6, 156.8, 147.8, 146.5, 141.6, 130.0, 128.3, 119.9, 115.7, 112.8, 26.7. HRMS (ESI) *m/z*: [M + H]<sup>+</sup> Calcd for C<sub>13</sub>H<sub>13</sub>N<sub>2</sub>O<sub>3</sub><sup>+</sup> 245.0921, found 245.0934.

*N*-(2-Methoxyphenyl)furan-2-carboxamide (**1h**) [5]

White solid (1.61 g, 74%), m.p.: 122.3-123.5 °C; <sup>1</sup>H NMR (400 MHz, CDCl<sub>3</sub>) δ 8.78 (s, 1H), 8.49 (dd, *J* = 7.9, 1.4 Hz, 1H), 7.56 – 7.50 (m, 1H), 7.22 (d, *J* = 3.4 Hz, 1H), 7.08 (td, *J* = 7.8, 1.5 Hz, 1H), 7.00 (td, *J* = 7.8, 1.5 Hz, 1H), 6.92 (d, *J* = 8.1 Hz, 1H), 6.55 (dd, *J* = 3.4, 1.7 Hz, 1H), 3.95 (s, 3H).

*N*-(2-Chlorophenyl)furan-2-carboxamide (**1i**) [6]

White solid (2.21 g, 77%), m.p.: 90.6-91.3 °C; <sup>1</sup>H NMR (400 MHz, CDCl<sub>3</sub>) δ 8.71 (s, 1H), 8.53 (dd, *J* = 8.3, 1.6 Hz, 1H), 7.56 (d, *J* = 1.8 Hz, 1H), 7.41 (dd, *J* = 8.0, 1.5 Hz, 1H), 7.35 – 7.29 (m, 1H), 7.27 (d, *J* = 3.4 Hz, 1H), 7.08 (td, *J* = 7.7, 1.6 Hz, 1H), 6.58 (dd, *J* = 3.5, 1.8 Hz, 1H).

Methyl 2-(furan-2-carboxamido)benzoate (**1j**) [7]

White solid (2.21 g, 90%), m.p.:114.0-114.3 °C; <sup>1</sup>H NMR (400 MHz, CDCl<sub>3</sub>) δ 12.02 (s, 1H), 8.86 (d, *J* = 8.4 Hz, 1H), 8.08 (dd, *J* = 8.0, 1.4 Hz, 1H), 7.65 – 7.55 (m, 2H), 7.27 (s, 1H), 7.12 (t, *J* = 7.7 Hz, 1H), 6.56 (dd, *J* = 3.4, 1.7 Hz, 1H), 3.98 (s, 3H).

*N*-(3-Methoxyphenyl)furan-2-carboxamide (**1k**) [8]

Yellow solid (2.21 g, 77%), m.p.: 82.3-83.1 °C; <sup>1</sup>H NMR (400 MHz, CDCl<sub>3</sub>) δ 8.08 (s, 1H), 7.51 (dd, *J* = 1.8, 0.9 Hz, 1H), 7.45 (t, *J* = 2.3 Hz, 1H), 7.25 (dd, *J* = 7.7, 3.8 Hz, 2H), 7.10 (ddd, *J* = 8.0, 2.1, 0.9 Hz, 1H), 6.70 (ddd, *J* = 8.3, 2.5, 0.9 Hz, 1H), 6.56 (dd, *J* = 3.5, 1.8 Hz, 1H), 3.83 (s, 3H).

*N*-(4-Methyl-2-oxo-2H-chromen-7-yl)furan-2-carboxamide (**1l**) [9]

White solid (2.21 g, 82%), m.p.: 254.7-255.4 °C; <sup>1</sup>H NMR (400 MHz, DMSO-*d*<sub>6</sub>) δ 10.60 (s, 1H), 8.00 (d, *J* = 1.7 Hz, 1H), 7.91 (s, 1H), 7.76 (s, 2H), 7.42 (d, *J* = 3.5 Hz, 1H), 6.75 (dd, *J* = 3.6, 1.7 Hz, 1H), 6.29 (d, *J* = 1.6 Hz, 1H), 2.42 (s, 3H).

*N*-(1-Methyl-1H-pyrazol-4-yl)furan-2-carboxamide (**1m**)<sup>[10]</sup>

Yellow solid (1.53 g, 80%), m.p.: 119-120 °C; <sup>1</sup>H NMR (400 MHz, DMSO-*d*<sub>6</sub>) δ 10.42 (s, 1H), 7.97 (s, 1H), 7.90 (dd, *J* = 1.9, 0.8 Hz, 1H), 7.56 (s, 1H), 7.21 (dd, *J* = 3.5, 0.8 Hz, 1H), 6.68 (dd, *J* = 3.5, 1.7 Hz, 1H), 3.81 (s, 3H).

*N*-(Thiazol-2-yl)furan-2-carboxamide (**1n**)<sup>[11]</sup>

White solid (1.75 g, 90%), m.p.: 143.7-144.3 °C; <sup>1</sup>H NMR (400 MHz, CDCl<sub>3</sub>) δ 11.21 (s, 1H), 7.57 (s, 1H), 7.52 (d, *J* = 3.6 Hz, 1H), 7.36 (d, *J* = 3.6 Hz, 1H), 7.04 (d, *J* = 3.6 Hz, 1H), 6.65 – 6.58 (m, 1H).

5-Chloro-*N*-phenylfuran-2-carboxamide (**1o**)<sup>[12]</sup>

Yellow solid (2.21 g, 56%), m.p.: 107.3-108.1 °C; <sup>1</sup>H NMR (400 MHz, CDCl<sub>3</sub>) δ 7.93 (s, 1H), 7.64 (d, *J* = 7.9 Hz, 2H), 7.37 (t, *J* = 7.7 Hz, 2H), 7.22 (d, *J* = 3.6 Hz, 1H), 7.16 (t, *J* = 7.4 Hz, 1H), 6.37 (d, *J* = 3.6 Hz, 1H).

5-Nitro-*N*-phenylfuran-2-carboxamide (**1p**)<sup>[13]</sup>

Yellow solid (1.18 g, 51%), m.p.: 174.0-175.0 °C; <sup>1</sup>H NMR (400 MHz, CDCl<sub>3</sub>) δ 8.20 (s, 1H), 7.68 (d, *J* = 7.9 Hz, 2H), 7.46 – 7.35 (m, 4H), 7.22 (t, *J* = 7.5 Hz, 1H).

Methyl 5-(phenylcarbamoyl)furan-2-carboxylate (**1q**)<sup>[14]</sup>

White solid (1.22 g, 49.6%), m.p.: 114.5-115.0 °C; <sup>1</sup>H NMR (400 MHz, CDCl<sub>3</sub>) δ 8.25 (s, 1H), 7.68 (d, *J* = 7.9 Hz, 2H), 7.39 (t, *J* = 8.0 Hz, 2H), 7.30 (d, *J* = 3.6 Hz, 1H), 7.25 (d, *J* = 2.9 Hz, 1H), 7.18 (t, *J* = 7.6 Hz, 1H), 3.96 (s, 3H).

*N*-Methylfuran-2-carboxamide (**1r**)<sup>[15]</sup>

White solid (1.74 g, 81.3%), m.p.: 61.2-62.5 °C; <sup>1</sup>H NMR (400 MHz, CDCl<sub>3</sub>) δ 7.42 (d, *J* = 1.7 Hz, 1H), 7.11 (d, *J* = 3.5 Hz, 1H), 6.49 (dd, *J* = 3.5, 1.8 Hz, 1H), 6.42 (s, 1H), 2.99 (d, *J* = 5.0 Hz, 3H).

*N*-(Benzyloxy)furan-2-carboxamide (**1u**): [16]

White solid (1.89 g, 87%), m.p.: 82.3-82.9 °C; <sup>1</sup>H NMR (400 MHz, CDCl<sub>3</sub>) δ 8.72 (s, 1H), 7.50 – 7.35 (m, 6H), 7.23 – 7.17 (m, 1H), 6.51 (q, *J* = 1.8 Hz, 1H), 5.03 (s, 2H).

*N*-(1,3-Dioxoisindolin-2-yl)furan-2-carboxamide (**1z**) [17]

White solid (1.74 g, 68%), m.p.: 163.7-164.6 °C; <sup>1</sup>H NMR (400 MHz, CDCl<sub>3</sub>) δ 8.33 (s, 1H), 7.95 (dd, *J* = 5.5, 3.1 Hz, 2H), 7.82 (dd, *J* = 5.5, 3.1 Hz, 2H), 7.58 – 7.54 (m, 1H), 7.29 (d, *J* = 3.6 Hz, 1H), 6.58 (dd, *J* = 3.6, 1.8 Hz, 1H).

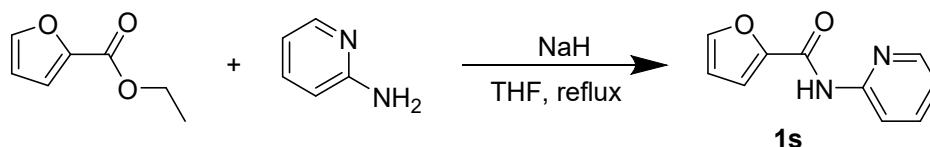

**Procedure for synthesis of substrate 1s:**[18-19] To a stirred suspension of pyridin-2-amine (510 mg, 5.4 mmol, 2.7 equiv) in anhydrous THF (20 mL) was added NaH (60% dispersion in mineral oil, 1.04 g, 26 mmol, 13 equiv). The mixture was heated at reflux for 3 h, then ethyl 2-furancarboxylate (280 mg, 2 mmol) was added. Reflux was continued for a further 3 h. After cooling, the solvent was removed in vacuo and the residue purified by silica gel column chromatography (petroleum ether/EtOAc = 1:1, v/v) to afford the product **1s**.

Yellow solid (300 mg, 80%), m.p.: 72.0-72.9 °C; <sup>1</sup>H NMR (400 MHz, CDCl<sub>3</sub>) δ 8.76 (s, 1H), 8.33 (d, *J* = 7.1 Hz, 2H), 7.75 (t, *J* = 8.0 Hz, 1H), 7.54 (s, 1H), 7.28 (d, *J* = 3.5 Hz, 1H), 7.08 (t, *J* = 6.2 Hz, 1H), 6.58 (dd, *J* = 3.7, 1.8 Hz, 1H).

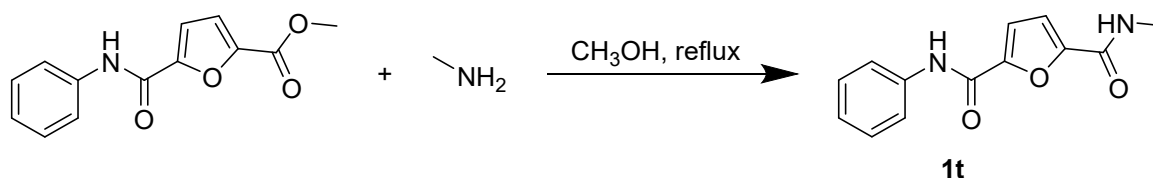

**Procedure for the synthesis of substrate 1t:**[18] To a solution (10 mL) of methyl 5-(phenylaminocarbonyl)furan-2-carboxylate (245 mg, 2 mmol) in methanol was added 40%

aqueous methylamine (13.8 mL, 4 mmol). The mixture was heated at reflux for 2 h, then concentrated under reduced pressure. Purification by silica gel column chromatography (petroleum ether/EtOAc = 1:1, v/v) afforded product **1t**.

White solid (214 mg, 96%), m.p.:196.7-197.1 °C; <sup>1</sup>H NMR (400 MHz, CDCl<sub>3</sub>) δ 8.20 (s, 1H), 7.63 (d, *J* = 7.8 Hz, 2H), 7.36 (t, *J* = 7.9 Hz, 2H), 7.25 (d, *J* = 1.7 Hz, 1H), 7.20 – 7.14 (m, 2H), 6.60 (s, 1H), 3.00 (d, *J* = 5.0, 3H). <sup>13</sup>C NMR (101 MHz, DMSO-*d*<sub>6</sub>) δ 158.1, 156.0, 149.3, 148.0, 138.4, 129.2, 124.7, 121.1, 116.1, 114.8, 79.7, 79.4, 79.1, 25.9. HRMS (ESI) *m/z*: [M + H]<sup>+</sup> Calcd for C<sub>13</sub>H<sub>13</sub>N<sub>2</sub>O<sub>3</sub><sup>+</sup> 245.0921, found 245.0934.

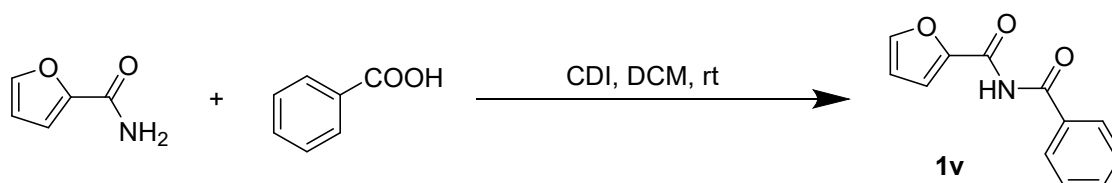

**Procedure for the synthesis of substrate 1v:**<sup>[20]</sup> A solution of benzoic acid (244 mg, 2 mmol) and 1,1'-carbonyldiimidazole (CDI, 356 mg, 2.2 mmol, 1.1 equiv) in anhydrous DCM was stirred at room temperature for 5 min. Furan-2-carboxamide (222 mg, 2 mmol, 1.0 equiv) and NaH (60% dispersion in mineral oil, 72 mg, 3 mmol, 1.5 equiv) were added, and the mixture was stirred at room temperature for 4 h while the reaction was monitored by TLC. Upon completion, the reaction was quenched with water, and the mixture was extracted with DCM. The combined organic layers were washed with brine, dried (Na<sub>2</sub>SO<sub>4</sub>), and concentrated in vacuo. The crude product was purified by column chromatography to afford the product **1v**.

White solid (234 mg, 54.4%), m.p.:196.7-197.2 °C; <sup>1</sup>H NMR (400 MHz, CDCl<sub>3</sub>) δ 9.32 (s, 1H), 7.90 (d, *J* = 7.6 Hz, 2H), 7.67 – 7.48 (m, 4H), 7.41 (d, *J* = 3.6 Hz, 1H), 6.63 (d, *J* = 3.7 Hz, 1H).

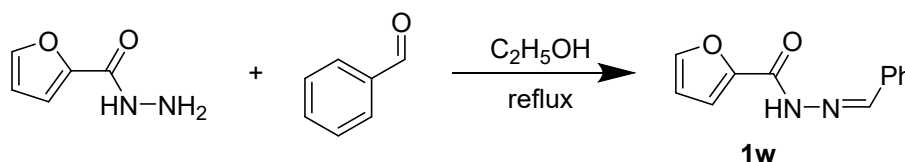

**Procedure for the synthesis of substrate 1w:**<sup>[21]</sup> Benzaldehyde (530 mg, 5 mmol) and furan-2-carbohydrazide (630 mg, 5 mmol, 1 equiv) were dissolved in ethanol. The mixture was stirred and heated at reflux for 6 h, during which the product precipitated. After cooling,

the solid was collected by filtration and purified by recrystallization from ethanol to afford the product **1w**.

White solid (931 mg, 87%), m.p.: 222.7-223.6 °C; <sup>1</sup>H NMR (400 MHz, DMSO-*d*<sub>6</sub>) δ 11.87 (s, 1H), 8.47 (s, 1H), 7.97 (s, 1H), 7.73 (d, *J* = 6.8 Hz, 2H), 7.48 (d, *J* = 6.7 Hz, 3H), 7.32 (s, 1H), 6.73 (s, 1H).

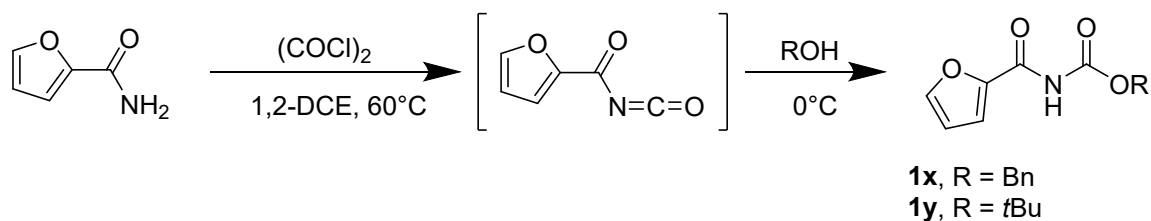

**General Procedure B:**<sup>[22]</sup> Oxalyl chloride (0.43 mL, 4.94 mmol, 1.2 equiv) was added dropwise to a stirred solution of furan-2-carboxamide (455 mg, 4.1 mmol) in 1,2-dichloroethane (10 mL) at 0 °C. The mixture was warmed to 60 °C and stirred for 1 h, then cooled back to 0 °C. A solution of the appropriate alcohol (8.2 mmol, 2 equiv) in 1,2-dichloroethane was introduced, and stirring was continued at 0 °C for 2 h. The reaction was quenched with saturated aqueous NaHCO<sub>3</sub>, extracted with DCM, and the combined organic phases were washed with brine, dried over Na<sub>2</sub>SO<sub>4</sub>, and concentrated. The crude product was purified by silica gel column chromatography (DCM to DCM/EtOAc 9:1, v/v) to afford the desired product.

Substrates **1x** and **1y** were prepared according to General Procedure B.

#### *N*-(Benzyloxy)furan-2-carboxamide (**1x**)

White solid (944 mg, 94%), m.p.: 130.1-131.0 °C; <sup>1</sup>H NMR (400 MHz, CDCl<sub>3</sub>) δ 8.35 (s, 1H), 7.50 (s, 1H), 7.46 – 7.31 (m, 6H), 6.58 (dd, *J* = 3.7, 1.7 Hz, 1H), 5.27 (s, 2H). <sup>13</sup>C NMR (101 MHz, CDCl<sub>3</sub>) δ 154.7, 150.4, 146.2, 145.4, 135.0, 128.7, 128.7, 117.8, 113.1, 68.0. HRMS (ESI) *m/z*: [M + Na]<sup>+</sup> Calcd for C<sub>13</sub>H<sub>11</sub>NNaO<sub>4</sub><sup>+</sup> 268.0580, found 268.0560.

#### *tert*-Butyl(furan-2-carbonyl)carbamate (**1y**)

White solid (486 mg, 56%), m.p.: 142.3-142.9 °C; <sup>1</sup>H NMR (400 MHz, CDCl<sub>3</sub>) δ 8.16 (s, 1H), 7.51 (s, 1H), 7.31 (d, *J* = 3.7 Hz, 1H), 6.57 (dd, *J* = 3.6, 1.8 Hz, 1H), 1.54 (s, 9H). <sup>13</sup>C

NMR (101 MHz, CDCl<sub>3</sub>)  $\delta$  155.1, 149.1, 146.5, 145.1, 117.3, 113.0, 82.8, 28.0. HRMS (ESI)  
*m/z*: [M + Na]<sup>+</sup> Calcd for C<sub>10</sub>H<sub>13</sub>NNaO<sub>4</sub><sup>+</sup> 234.0737, found 234.0754.

### III. Experimental Procedure and Characterization Data of Products

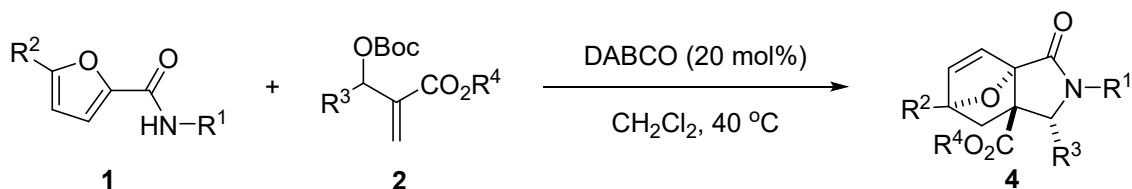

**General experimental procedure:** A mixture of furan-2-carboxamide **1** (0.2 mmol), MBH carbonate **2** (0.24 mmol, 1.2 equiv), and DABCO (4.5 mg, 0.04 mmol, 20 mol%) in CH<sub>2</sub>Cl<sub>2</sub> (2.0 mL) was stirred in a sealed tube at 40 °C (oil bath) until TLC analysis indicated the complete consumption of **1**. The solvent was removed under reduced pressure, and the residue was purified by flash chromatography on silica gel (eluent: petroleum ether/EtOAc) to afford the corresponding product.

*Methyl 2-(4-methoxyphenyl)-3-oxo-1-phenyl-2,3,6,7-tetrahydro-3a,6-epoxyisoindole-7a(1H)-carboxylate (4a)*

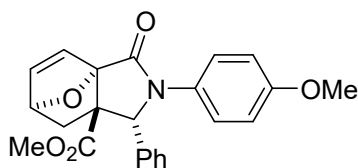

Purification by column chromatography (eluent: petroleum ether/EtOAc = 4:1). White solid (77 mg, 99% yield, dr > 20:1), m.p.: 96.3–97.3 °C; <sup>1</sup>H NMR (400 MHz, CDCl<sub>3</sub>) δ 7.49 (brs, 1H), 7.39 – 7.27 (m, 5H), 7.08 (brs, 1H), 6.81 (d, *J* = 8.9 Hz, 2H), 6.64 (d, *J* = 5.7 Hz, 1H), 6.57 (d, *J* = 5.7 Hz, 1H), 5.32 (s, 1H), 4.98 (d, *J* = 4.1 Hz, 1H), 3.79 (s, 3H), 3.74 (s, 3H), 1.97 (d, *J* = 12.3 Hz, 1H), 1.65 (dd, *J* = 12.2, 4.4 Hz, 1H). <sup>13</sup>C NMR (101 MHz, CDCl<sub>3</sub>) δ 173.0, 167.2, 157.8, 140.0, 137.0, 132.9, 131.0, 128.9, 128.3, 125.2, 114.3, 94.1, 82.3, 70.1, 59.6, 55.4, 53.0, 33.9. HRMS (ESI) *m/z*: [M + H]<sup>+</sup> Calcd for C<sub>23</sub>H<sub>22</sub>NO<sub>5</sub><sup>+</sup> 392.1492, found 392.1499.

*Methyl 3-oxo-1,2-diphenyl-2,3,6,7-tetrahydro-3a,6-epoxyisoindole-7a(1H)-carboxylate (4b)*

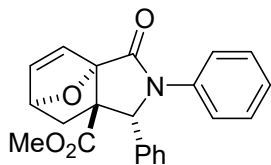

Purification by column chromatography (eluent: petroleum ether/EtOAc = 4:1). White solid (64 mg, 89% yield, dr > 20:1), m.p.: 183.5–185.2 °C; <sup>1</sup>H NMR (400 MHz, CDCl<sub>3</sub>) δ 7.49 (d, *J* = 8.4 Hz, 2H), 7.44 (brs, 1H), 7.34 – 7.26 (m, 5H), 7.14 (t, *J* = 7.4 Hz, 2H), 6.65 (d, *J* = 5.8 Hz, 1H), 6.58 (dd, *J* = 5.8, 1.6 Hz, 1H), 5.43 (s, 1H), 4.97 (dd, *J* = 4.5, 1.5 Hz, 1H), 3.77 (s, 3H), 1.98 (d, *J* = 12.3 Hz, 1H), 1.68 (dd, *J* = 12.3, 4.6 Hz, 1H). <sup>13</sup>C NMR (101 MHz, CDCl<sub>3</sub>) δ 172.9, 167.3, 140.1, 138.2, 136.9, 132.9, 129.0, 128.8, 128.3, 126.1, 123.1, 94.1, 82.3, 69.4, 59.5, 53.1, 34.0. HRMS (ESI) *m/z*: [M + H]<sup>+</sup> Calcd for HRMS (ESI) *m/z*: [M + H]<sup>+</sup> Calcd for C<sub>22</sub>H<sub>20</sub>NO<sub>4</sub><sup>+</sup> 362.1387, found 362.1378.

*Methyl 2-(4-chlorophenyl)-3-oxo-1-phenyl-2,3,6,7-tetrahydro-3a,6-epoxyisoindole-7a(1H)-carboxylate (4c)*

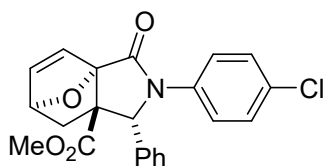

Purification by column chromatography (eluent: petroleum ether/EtOAc = 4:1). White solid (70 mg, 89% yield, dr > 20:1), m.p.: 138.9-139.9 °C; <sup>1</sup>H NMR (400 MHz, CDCl<sub>3</sub>) δ 7.46 (d, *J* = 8.9 Hz, 2H), 7.42 – 7.27 (m, 4H), 7.24 (d, *J* = 8.9 Hz, 1H), 7.13 (brs, 1H), 6.63 (d, *J* = 5.8 Hz, 1H), 6.58 (dd, *J* = 5.8, 1.5 Hz, 1H), 5.39 (s, 1H), 4.97 (dd, *J* = 4.5, 1.5 Hz, 1H), 3.77 (s, 3H), 1.98 (d, *J* = 12.3 Hz, 1H), 1.68 (dd, *J* = 12.3, 4.6 Hz, 1H). <sup>13</sup>C NMR (101 MHz, CDCl<sub>3</sub>) δ 172.8, 167.3, 140.2, 136.7, 136.5, 132.7, 131.3, 129.1, 128.8, 128.5, 128.1, 124.0, 94.0, 82.4, 69.3, 59.4, 53.1, 34.0. HRMS (ESI) *m/z*: [M + H]<sup>+</sup> Calcd for C<sub>22</sub>H<sub>19</sub>ClNO<sub>4</sub><sup>+</sup> 396.0997, found 396.1002.

*Methyl 2-(4-fluorophenyl)-3-oxo-1-phenyl-2,3,6,7-tetrahydro-3a,6-epoxyisoindole-7a(1H)-carboxylate (4d)*

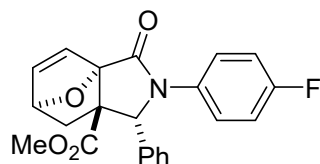

Purification by column chromatography (eluent: petroleum ether/EtOAc = 4:1). White solid (60 mg, 79% yield, dr > 20:1), m.p.: 137.2-139.1 °C; <sup>1</sup>H NMR (400 MHz, CDCl<sub>3</sub>) δ 7.45 – 7.41 (m, 3H), 7.35 – 7.28 (m, 3H), 7.10 (brs, 1H), 6.97 (t, *J* = 8.7 Hz, 2H), 6.63 (d, *J* = 5.8 Hz, 1H), 6.58 (dd, *J* = 5.8, 1.5 Hz, 1H), 5.35 (s, 1H), 4.98 (dd, *J* = 4.5, 1.5 Hz, 1H), 3.78 (s, 3H), 1.98 (d, *J* = 12.3 Hz, 1H), 1.67 (dd, *J* = 12.3, 4.6 Hz, 1H). <sup>13</sup>C NMR (101 MHz, CDCl<sub>3</sub>) δ 172.8, 160.5 (d, *J*<sub>C-F</sub> = 251.5 Hz), 167.3, 140.1, 136.6, 134.1, 132.8, 128.9, 128.5, 125.2 (d, *J*<sub>C-F</sub> = 8.3 Hz), 115.9 (d, *J*<sub>C-F</sub> = 22.6 Hz), 94.0, 82.4, 69.9, 59.5, 53.1, 34.0. <sup>19</sup>F NMR (376 MHz, CDCl<sub>3</sub>) δ -115.25. HRMS (ESI) *m/z*: [M + H]<sup>+</sup> Calcd for C<sub>22</sub>H<sub>19</sub>FNO<sub>4</sub><sup>+</sup> 380.1293, found 380.1282.

*Methyl*                      2-(4-(ethoxycarbonyl)phenyl)-3-oxo-1-phenyl-2,3,6,7-tetrahydro-3a,6-epoxyisoindole-7a(1H)-carboxylate (**4e**)

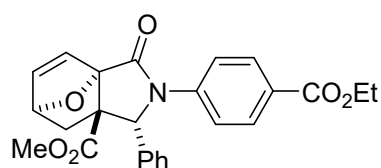

Purification by column chromatography (eluent: petroleum ether/EtOAc = 4:1). White solid (85 mg, yield 98%, dr > 20:1), m.p.: 157.3-158.9 °C; <sup>1</sup>H NMR (400 MHz, CDCl<sub>3</sub>) δ 7.95 (d, *J* = 8.8 Hz, 2H), 7.66 (d, *J* = 8.8 Hz, 2H), 7.42 – 7.26 (m, 4H), 7.18 (brs, 1H), 6.64 (d, *J* = 5.8 Hz, 1H), 6.59 (dd, *J* = 5.8, 1.5 Hz, 1H), 5.51 (s, 1H), 4.97 (dd, *J* = 4.4, 1.4 Hz, 1H), 4.32 (q, *J* = 7.1 Hz, 2H), 3.76 (s, 3H), 1.99 (d, *J* = 12.3 Hz, 1H), 1.72 (dd, *J* = 12.3, 4.6 Hz, 1H), 1.34 (t, *J* = 7.1 Hz, 3H). <sup>13</sup>C NMR (101 MHz, CDCl<sub>3</sub>) δ 172.7, 167.5, 165.9, 142.1, 140.2, 136.5, 132.7, 130.4, 129.1, 128.5, 127.9, 127.1, 121.3, 94.0, 82.4, 68.8, 60.9, 59.2, 53.1, 34.1, 14.3. HRMS (ESI) *m/z*: [M + H]<sup>+</sup> Calcd for C<sub>25</sub>H<sub>24</sub>NO<sub>6</sub><sup>+</sup> 434.1598, found 434.1629.

*Methyl*                      3-oxo-1-phenyl-2-(4-(trifluoromethyl)phenyl)-2,3,6,7-tetrahydro-3a,6-epoxyisoindole-7a(1H)-carboxylate (**4f**)

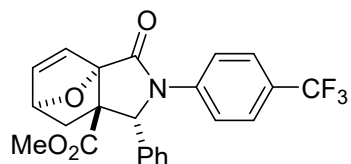

Purification by column chromatography (eluent: petroleum ether/EtOAc = 4:1). White solid (84.6 mg, 99% yield, dr > 20:1), m.p.: 139.2-140.3 °C;  $^1\text{H}$  NMR (400 MHz,  $\text{CDCl}_3$ )  $\delta$  7.70 (d,  $J$  = 8.6 Hz, 2H), 7.53 (d,  $J$  = 8.7 Hz, 2H), 7.41 – 7.27 (m, 4H), 7.19 (brs, 1H), 6.64 (d,  $J$  = 5.8 Hz, 1H), 6.60 (dd,  $J$  = 5.8, 1.4 Hz, 1H), 5.48 (s, 1H), 4.98 (dd,  $J$  = 4.5, 1.3 Hz, 1H), 3.76 (s, 3H), 2.00 (d,  $J$  = 12.3 Hz, 1H), 1.71 (dd,  $J$  = 12.3, 4.6 Hz, 1H).  $^{13}\text{C}$  NMR (101 MHz,  $\text{CDCl}_3$ )  $\delta$  172.7, 167.6, 141.3, 140.3, 136.4, 132.7, 129.2, 128.6, 127.9, 126.2 (q,  $J_{\text{C-F}}$  = 3.7 Hz), 121.9, 94.0, 82.5, 69.0, 59.4, 53.2, 34.1.  $^{19}\text{F}$  NMR (376 MHz,  $\text{CDCl}_3$ )  $\delta$  -62.43. HRMS (ESI)  $m/z$ :  $[\text{M} + \text{H}]^+$  Calcd for  $\text{C}_{23}\text{H}_{19}\text{F}_3\text{NO}_4^+$  430.1261, found 430.1240.

*Methyl*                    2-(4-(methylcarbamoyl)phenyl)-3-oxo-1-phenyl-2,3,6,7-tetrahydro-3a,6-epoxyisoindole-7a(1H)-carboxylate (**4g**)

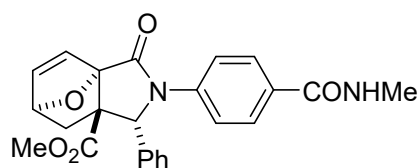

Purification by column chromatography (eluent: petroleum ether/EtOAc = 4:1). White solid (73 mg, 87% yield, dr > 20:1), m.p.: 131.5-132.4 °C;  $^1\text{H}$  NMR (400 MHz,  $\text{CDCl}_3$ )  $\delta$  7.67 (d,  $J$  = 8.4 Hz, 2H), 7.62 (d,  $J$  = 8.4 Hz, 4H), 7.39 – 7.27 (m, 3H), 7.17 (brs, 1H), 6.64 (d,  $J$  = 5.7 Hz, 1H), 6.59 (d,  $J$  = 5.6 Hz, 1H), 6.13 (brs, 1H), 5.50 (s, 1H), 5.30 (s, 1H), 4.97 (d,  $J$  = 3.7 Hz, 1H), 3.76 (s, 3H), 2.97 (d,  $J$  = 4.6 Hz, 3H), 1.99 (d,  $J$  = 12.3 Hz, 1H), 1.71 (dd,  $J$  = 12.2, 4.4 Hz, 1H).  $^{13}\text{C}$  NMR (101 MHz,  $\text{CDCl}_3$ )  $\delta$  172.7, 167.6, 167.4, 140.5, 140.4, 136.3, 132.7, 131.6, 129.1, 128.7, 128.5, 127.8, 122.0, 94.1, 82.4, 68.9, 59.2, 53.2, 34.1, 26.8. HRMS (ESI)  $m/z$ :  $[\text{M} + \text{H}]^+$  Calcd for  $\text{C}_{24}\text{H}_{23}\text{N}_2\text{O}_5^+$  419.1601, found 419.1604.

*Methyl*                    2-(2-methoxyphenyl)-3-oxo-1-phenyl-2,3,6,7-tetrahydro-3a,6-epoxyisoindole-7a(1H)-carboxylate (**4h**)

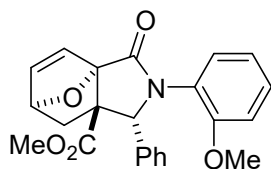

Purification by column chromatography (eluent: petroleum ether/EtOAc = 4:1). White solid (76.6 mg, 98% yield, dr > 20:1), m.p.: 141.1-142.5 °C; <sup>1</sup>H NMR (400 MHz, CDCl<sub>3</sub>) δ 7.66 (brs, 1H), 7.33 – 7.16 (m, 5H), 7.00 (brs, 1H), 6.91 – 6.87 (m, 2H), 6.69 (d, *J* = 5.8 Hz, 1H), 6.54 (d, *J* = 5.6 Hz, 1H), 5.55 (s, 1H), 4.97 (d, *J* = 4.1 Hz, 1H), 3.84 (s, 3H), 3.82 (s, 3H), 1.91 (d, *J* = 12.3 Hz, 1H), 1.67 (dd, *J* = 12.2, 4.3 Hz, 1H). <sup>13</sup>C NMR (101 MHz, CDCl<sub>3</sub>) δ 173.4, 167.3, 155.1, 139.5, 136.9, 133.6, 129.2, 129.1, 128.7, 128.2, 125.5, 120.9, 112.5, 93.0, 81.9, 69.2, 59.8, 55.9, 52.7, 34.5. HRMS (ESI) *m/z*: [M + H]<sup>+</sup> Calcd for C<sub>23</sub>H<sub>22</sub>NO<sub>5</sub><sup>+</sup> 392.1492, found 392.1499.

*Methyl 2-(2-chlorophenyl)-3-oxo-1-phenyl-2,3,6,7-tetrahydro-3a,6-epoxyisoindole-7a(1H)-carboxylate (4i)*

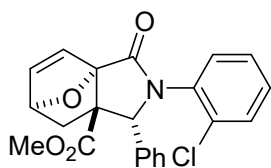

Purification by column chromatography (eluent: petroleum ether/EtOAc = 4:1). White solid (66.5 mg, 84% yield, dr > 20:1), m.p.: 141.8-142.6 °C; <sup>1</sup>H NMR (400 MHz, CDCl<sub>3</sub>) δ 7.76 (brs, 1H), 7.42 – 7.27 (m, 3H), 7.25 – 7.16 (m, 4H), 7.02 (brs, 1H), 6.71 (d, *J* = 5.1 Hz, 1H), 6.57 (d, *J* = 4.9 Hz, 1H), 5.57 (s, 1H), 5.03 (s, 1H), 3.82 (s, 3H), 1.93 (d, *J* = 12.2 Hz, 1H), 1.71 (d, *J* = 12.3 Hz, 1H). <sup>13</sup>C NMR (101 MHz, CDCl<sub>3</sub>) δ 173.1, 167.8, 139.7, 136.0, 134.4, 133.3, 132.0, 130.9, 129.5, 129.3, 128.9, 128.6, 128.3, 127.6, 100.0, 82.0, 69.6, 59.8, 52.8, 34.7. HRMS (ESI) *m/z*: [M + H]<sup>+</sup> Calcd for C<sub>22</sub>H<sub>19</sub>ClNO<sub>4</sub><sup>+</sup> 396.0997, found 396.1002.

*Methyl 2-(2-(methoxycarbonyl)phenyl)-3-oxo-1-phenyl-2,3,6,7-tetrahydro-3a,6-epoxyisoindole-7a(1H)-carboxylate (4j)*

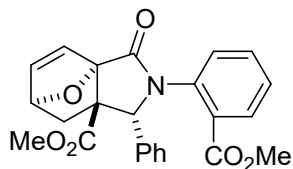

Purification by column chromatography (eluent: petroleum ether/EtOAc = 4:1). White solid (81.2 mg, 97% yield, dr = 12:1), m.p.: 144.4-145.9 °C; Data for major isomer: <sup>1</sup>H NMR (400 MHz, CDCl<sub>3</sub>) δ 7.97 (brs, 1H), 7.83 (d, *J* = 6.7 Hz, 1H), 7.42 (t, *J* = 7.1 Hz, 1H), 7.32 (d, *J* = 8.0 Hz, 2H), 7.26 – 7.19 (m, 3H), 7.08 (brs, 1H), 6.64 (d, *J* = 5.8 Hz, 1H), 6.56 (dd, *J* = 5.8, 1.6 Hz, 1H), 5.74 (s, 1H), 5.03 (d, *J* = 3.1 Hz, 1H), 3.91 (s, 3H), 3.81 (s, 3H), 1.93 (d, *J* = 12.2 Hz, 1H), 1.72 (dd, *J* = 12.3, 4.5 Hz, 1H). <sup>13</sup>C NMR (101 MHz, CDCl<sub>3</sub>) δ 173.2, 167.3, 166.6, 139.8, 136.4, 136.0, 132.7, 132.4, 131.3, 129.2, 128.4, 128.3, 126.8, 124.7, 93.5, 81.9, 69.7, 59.2, 53.0, 52.5, 34.6. HRMS (ESI) *m/z*: [M + H]<sup>+</sup> Calcd for C<sub>24</sub>H<sub>22</sub>NO<sub>6</sub><sup>+</sup> 420.1442, found 420.1454.

*Methyl 2-(3-methoxyphenyl)-3-oxo-1-phenyl-2,3,6,7-tetrahydro-3a,6-epoxyisoindole-7a(1H)-carboxylate (4k)*

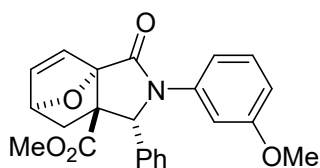

Purification by column chromatography (eluent: petroleum ether/EtOAc = 4:1). White solid (75 mg, 96% yield, dr > 20:1), m.p.: 127.3-128.2 °C; <sup>1</sup>H NMR (400 MHz, CDCl<sub>3</sub>) δ 7.42 (brs, 1H), 7.34 – 7.26 (m, 2H), 7.20 – 7.09 (m, 3H), 7.01 (d, *J* = 8.1 Hz, 1H), 6.68 (dd, *J* = 8.2, 2.2 Hz, 1H), 6.64 (d, *J* = 5.8 Hz, 1H), 6.57 (dd, *J* = 5.8, 1.5 Hz, 1H), 5.41 (s, 1H), 4.97 (dd, *J* = 4.4, 1.4 Hz, 1H), 3.77 (s, 3H), 3.72 (s, 3H), 1.97 (d, *J* = 12.3 Hz, 1H), 1.68 (dd, *J* = 12.3, 4.7 Hz, 1H). <sup>13</sup>C NMR (101 MHz, CDCl<sub>3</sub>) δ 172.9, 167.3, 159.9, 140.1, 139.4, 137.0, 132.9, 129.6, 128.7, 128.3, 128.2, 115.0, 111.6, 109.0, 94.2, 82.3, 69.4, 59.4, 55.3, 53.1, 34.0. HRMS (ESI) *m/z*: [M + H]<sup>+</sup> Calcd for C<sub>23</sub>H<sub>22</sub>NO<sub>5</sub><sup>+</sup> 392.1492, found 392.1499.

*Methyl 2-(4-methyl-2-oxo-2H-chromen-7-yl)-3-oxo-1-phenyl-2,3,6,7-tetrahydro-3a,6-epoxyisoindole-7a(1H)-carboxylate (4l)*

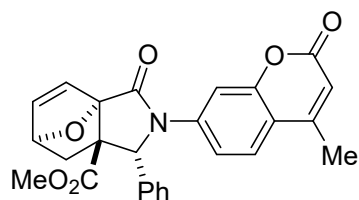

Purification by column chromatography (eluent: petroleum ether/EtOAc = 4:1). White solid (55.8 mg, 63% yield, dr > 20:1), m.p.: 183.2-184.1 °C; <sup>1</sup>H NMR (400 MHz, CDCl<sub>3</sub>) δ 7.84 (d, *J* = 8.8 Hz, 1H), 7.52 (d, *J* = 8.7 Hz, 1H), 7.36 (brs, 2H), 7.30 (brs, 3H), 7.21 (brs, 1H), 6.64 (d, *J* = 5.6 Hz, 1H), 6.60 (d, *J* = 6.0 Hz, 1H), 6.19 (s, 1H), 5.48 (s, 1H), 4.98 (d, *J* = 4.0 Hz, 1H), 3.76 (s, 3H), 2.37 (s, 3H), 2.00 (d, *J* = 12.3 Hz, 1H), 1.72 (dd, *J* = 12.2, 4.1 Hz, 1H). <sup>13</sup>C NMR (101 MHz, CDCl<sub>3</sub>) δ 172.6, 160.7, 167.6, 153.8, 151.9, 141.4, 140.4, 136.2, 132.9, 132.6, 129.2, 128.7, 127.7, 125.1, 117.8, 117.3, 117.1, 114.3, 109.3, 94.0, 82.5, 68.9, 59.3, 53.2, 34.1, 18.6. HRMS (ESI) *m/z*: [M + H]<sup>+</sup> Calcd for C<sub>26</sub>H<sub>22</sub>NO<sub>6</sub><sup>+</sup> 444.1442, found 444.1408.

*Methyl 2-(1-methyl-1H-pyrazol-4-yl)-3-oxo-1-phenyl-2,3,6,7-tetrahydro-3a,6-epoxyisoindole-7a(1H)-carboxylate (4m)*

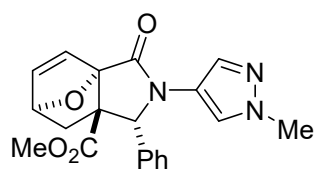

Purification by column chromatography (eluent: petroleum ether/EtOAc = 4:1). White solid (72 mg, 99% yield, dr > 20:1), m.p.: 140.0-140.9 °C; <sup>1</sup>H NMR (400 MHz, CDCl<sub>3</sub>) δ 8.0 (s, 1H), 7.40 (brs, 1H), 7.33 – 7.30 (m, 2H), 7.26 – 7.00 (m, 2H), 7.12 (brs, 1H), 6.63 (d, *J* = 5.4 Hz, 1H), 6.57 (d, *J* = 5.7 Hz, 1H), 5.19 (s, 1H), 4.95 (d, *J* = 4.1 Hz, 1H), 3.83 (s, 3H), 3.72 (s, 3H), 1.96 (d, *J* = 12.3 Hz, 1H), 1.68 (dd, *J* = 12.1, 4.0 Hz, 1H). <sup>13</sup>C NMR (101 MHz, CDCl<sub>3</sub>) δ 172.8, 165.2, 140.1, 136.2, 132.8, 130.2, 129.2, 128.5, 127.8, 122.2, 121.9, 93.5, 82.3, 68.6, 60.4, 53.1, 39.3, 33.8. HRMS (ESI) *m/z*: [M + H]<sup>+</sup> Calcd for C<sub>20</sub>H<sub>20</sub>N<sub>3</sub>O<sub>4</sub><sup>+</sup> 366.1448, found 366.1437.

*Methyl 3-oxo-1-phenyl-2-(pyridin-2-yl)-2,3,6,7-tetrahydro-3a,6-epoxyisoindole-7a(1H)-carboxylate (4n)*

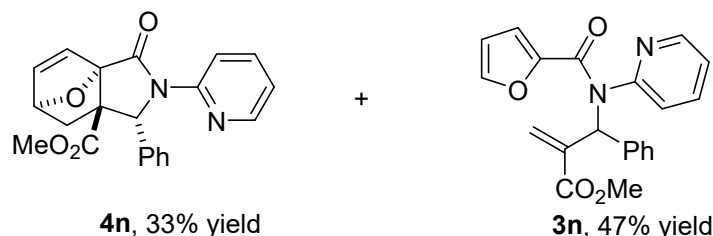

Under standard conditions, the reaction afforded a mixture of **4n** and intermediate **3n**, which could not be fully converted even upon prolonged reaction. The two components were separated by column chromatography (eluent: petroleum ether/EtOAc = 4:1).

Characterization data for product **4n**: White solid (24 mg, 33% yield, dr > 20:1), m.p.: 149.6–150.4 °C; <sup>1</sup>H NMR (400 MHz, CDCl<sub>3</sub>) δ 8.39 (d, *J* = 8.3 Hz, 1H), 8.17 (d, *J* = 4.4 Hz, 1H), 7.71 (t, *J* = 7.6 Hz, 1H), 7.36 – 7.12 (m, 5H), 7.01 – 6.94 (m, 1H), 6.65 (d, *J* = 5.7 Hz, 1H), 6.57 (d, *J* = 5.5 Hz, 1H), 6.26 (s, 1H), 4.95 (d, *J* = 3.9 Hz, 1H), 3.73 (s, 3H), 1.98 (d, *J* = 12.2 Hz, 1H), 1.75 (dd, *J* = 12.1, 4.4 Hz, 1H). <sup>13</sup>C NMR (101 MHz, CDCl<sub>3</sub>) δ 173.0, 167.7, 150.5, 147.7, 140.0, 137.9, 137.7, 132.9, 127.6, 120.3, 116.7, 94.7, 82.4, 65.8, 58.5, 53.0, 34.1. HRMS (ESI) *m/z*: [M + H]<sup>+</sup> Calcd for C<sub>21</sub>H<sub>19</sub>N<sub>2</sub>O<sub>4</sub><sup>+</sup> 363.1339, found 363.1353.

Characterization data for intermediate **3n**: Colorless oil (34 mg, 47% yield); <sup>1</sup>H NMR (400 MHz, CDCl<sub>3</sub>) δ 8.39 (d, *J* = 4.6 Hz, 1H), 7.74 (s, 1H), 7.57 (t, *J* = 7.7 Hz, 1H), 7.31 (d, *J* = 31.9 Hz, 5H), 7.21 – 7.04 (m, 2H), 6.90 (d, *J* = 7.9 Hz, 1H), 6.40 – 6.06 (m, 2H), 5.18 (s, 2H), 3.70 (s, 3H). <sup>13</sup>C NMR (101 MHz, CDCl<sub>3</sub>) δ 167.9, 159.5, 154.8, 148.9, 147.5, 144.2, 143.2, 137.6, 134.6, 129.4, 128.9, 128.5, 128.0, 123.0, 122.4, 116.5, 111.1, 52.1, 44.4. HRMS (ESI) *m/z*: [M + H]<sup>+</sup> Calcd for C<sub>21</sub>H<sub>19</sub>N<sub>2</sub>O<sub>4</sub><sup>+</sup> 363.1339, found 363.1353.

*Methyl* (1*R*,3*aS*,6*S*,7*aR*)-3-oxo-1-phenyl-2-(thiazol-2-yl)-2,3,6,7-tetrahydro-3*a*,6-epoxyisoindole-7*a*(1*H*)-carboxylate (**4o**)

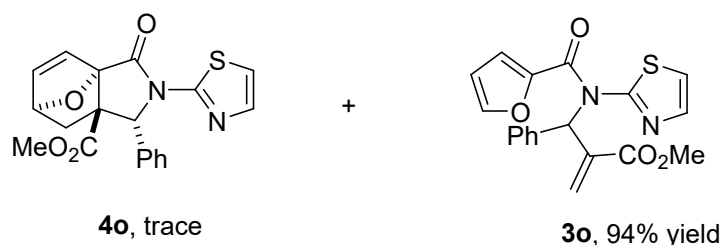

Under standard conditions, the reaction afforded product **4o** in trace amount; while intermediate **3o** was isolated as the major product by column chromatography (eluent:

petroleum ether/EtOAc = 4:1). The intermediate failed to convert even upon prolonged reaction times or at elevated temperature (toluene, reflux).

Characterization data for **3o**: Colorless oil (69.2 mg, 94% yield). <sup>1</sup>H NMR (400 MHz, CDCl<sub>3</sub>) δ 7.60 (brs, 1H), 7.47 – 7.41 (m, 3H), 7.37 – 7.31 (m, 3H), 7.23 (d, *J* = 3.4 Hz, 1H), 6.84 (d, *J* = 4.7 Hz, 1H), 6.61 (d, *J* = 6.6 Hz, 1H), 6.60 (s, 1H), 6.52 (brs, 1H), 5.45 (s, 1H), 3.79 (s, 3H). <sup>13</sup>C NMR (101 MHz, CDCl<sub>3</sub>) δ 166.9, 165.8, 165.5, 151.8, 145.4, 138.5, 136.0, 129.2, 128.9, 128.5, 128.4, 124.6, 115.7, 111.6, 108.6, 61.4, 52.5. HRMS (ESI) *m/z*: [M + H]<sup>+</sup> Calcd for C<sub>19</sub>H<sub>17</sub>N<sub>2</sub>O<sub>4</sub>S<sup>+</sup> 369.0904, found 369.0894.

*Methyl 6-chloro-3-oxo-1,2-diphenyl-2,3,6,7-tetrahydro-3a,6-epoxyisoindole-7a(1H)-carboxylate (4p)*

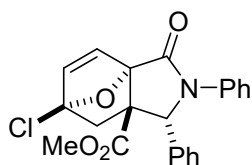

Purification by column chromatography (eluent: petroleum ether/EtOAc = 4:1). White solid (65.6 mg, 83% yield, dr > 20:1), m.p.: 170.7-172.3 °C; <sup>1</sup>H NMR (400 MHz, CDCl<sub>3</sub>) δ 7.46 (d, *J* = 8.1 Hz, 3H), 7.37 – 7.26 (m, 5H), 7.16 (t, *J* = 7.2 Hz, 1H), 7.12 – 7.07 (m, 1H), 6.75 (d, *J* = 5.6 Hz, 1H), 6.53 (d, *J* = 5.6 Hz, 1H), 5.42 (s, 1H), 3.79 (s, 3H), 2.54 (d, *J* = 12.3 Hz, 1H), 1.85 (d, *J* = 12.3 Hz, 1H). <sup>13</sup>C NMR (101 MHz, CDCl<sub>3</sub>) δ 171.8, 165.3, 142.2, 137.8, 136.0, 134.2, 129.1, 128.9, 128.6, 125.9, 126.4, 123.2, 101.0, 91.4, 69.5, 61.9, 53.4, 43.2. HRMS (ESI) *m/z*: [M + H]<sup>+</sup> Calcd for C<sub>22</sub>H<sub>19</sub>ClNO<sub>4</sub><sup>+</sup> 396.0997, found 396.1002.

*Methyl 6-nitro-3-oxo-1,2-diphenyl-2,3,6,7-tetrahydro-3a,6-epoxyisoindole-7a(1H)-carboxylate (4q)*

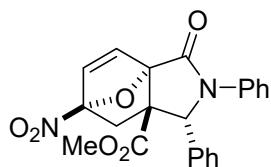

Purification by column chromatography (eluent: petroleum ether/EtOAc = 4:1). White solid (78.8 mg, 97% yield, dr > 20:1), m.p.: 177.6-178.3 °C; <sup>1</sup>H NMR (400 MHz, CDCl<sub>3</sub>) δ 7.56 – 7.51 (m, 1H), 7.46 (d, *J* = 8.0 Hz, 2H), 7.43 – 7.38 (m, 1H), 7.19 (t, *J* = 7.3 Hz, 1H), 7.10 (brs, 1H), 6.92 (d, *J* = 5.7 Hz, 1H), 6.87 (d, *J* = 5.6 Hz, 1H), 5.48 (s, 1H), 3.84 (s, 3H), 2.71

(d,  $J = 12.1$  Hz, 1H), 1.99 (d,  $J = 12.1$  Hz, 1H).  $^{13}\text{C}$  NMR (101 MHz,  $\text{CDCl}_3$ )  $\delta$  171.1, 164.1, 137.5, 137.0, 136.1, 135.2, 129.5, 129.2, 128.8, 128.6, 128.0, 126.8, 123.3, 112.7, 91.5, 69.4, 60.9, 53.7, 39.0. HRMS (ESI)  $m/z$ :  $[\text{M} + \text{H}]^+$  Calcd for  $\text{C}_{22}\text{H}_{19}\text{N}_2\text{O}_6^+$  407.1238, found 407.1227.

*Methyl 6-(methylcarbamoyl)-3-oxo-1,2-diphenyl-2,3,6,7-tetrahydro-3a,6-epoxyisoindole-7a(1H)-carboxylate (4r)*

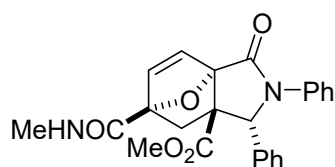

Purification by column chromatography (eluent: petroleum ether/EtOAc = 4:1). White solid (52 mg, 62% yield, dr > 20:1), m.p.: 156.3–157.6 °C;  $^1\text{H}$  NMR (400 MHz,  $\text{CDCl}_3$ )  $\delta$  7.51 (d,  $J = 7.8$  Hz, 2H), 7.42 – 7.28 (m, 6H), 7.16 (t,  $J = 7.2$  Hz, 2H), 6.76 (d,  $J = 5.6$  Hz, 1H), 6.69 (d,  $J = 5.6$  Hz, 1H), 5.86 (brs, 1H), 5.47 (s, 1H), 3.78 (s, 3H), 2.70 (d,  $J = 4.9$  Hz, 3H), 2.38 (d,  $J = 12.4$  Hz, 1H), 1.70 (d,  $J = 12.5$  Hz, 1H).  $^{13}\text{C}$  NMR (101 MHz,  $\text{CDCl}_3$ )  $\delta$  172.1, 168.2, 166.2, 140.4, 137.9, 136.6, 132.9, 129.1, 128.7, 128.5, 126.3, 122.9, 94.2, 91.8, 69.5, 60.8, 53.3, 37.8, 25.6. HRMS (ESI)  $m/z$ :  $[\text{M} + \text{H}]^+$  Calcd for  $\text{C}_{24}\text{H}_{23}\text{N}_2\text{O}_5^+$  419.1601, found 419.1604.

*Dimethyl 3-oxo-1,2-diphenyl-2,3-dihydro-3a,6-epoxyisoindole-6,7a(1H,7H)-dicarboxylate (4s)*

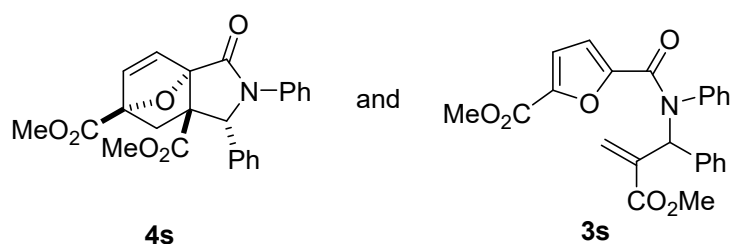

Under standard conditions, the reaction furnished an inseparable mixture of product **4s** and intermediate **3s** (**4s**:**3s** = 5:4), which could not be driven to completion even with extended reaction times. Column chromatography (petroleum ether/EtOAc = 4:1) afforded 75.4 mg of a colorless oil (90% total yield). Characterization for the inseparable mixture was limited to  $^1\text{H}$  NMR spectroscopy.

$^1\text{H}$  NMR (400 MHz,  $\text{CDCl}_3$ ) for **4s**:  $\delta$  7.46 (d,  $J = 7.9$  Hz, 2H), 7.38 – 7.21 (m, 7H, overlapped), 7.15 (t,  $J = 7.2$  Hz, 1H), 6.74 (d,  $J = 5.5$  Hz, 1H), 6.70 (d,  $J = 5.6$  Hz, 1H), 5.45 (s, 1H), 3.80 (s, 3H, overlapped), 3.73 (s, 3H), 2.33 (d,  $J = 12.1$  Hz, 1H), 1.78 (d,  $J = 12.1$  Hz, 1H).

$^1\text{H}$  NMR (400 MHz,  $\text{CDCl}_3$ ) for **3s**:  $\delta$  7.54 (brs, 1H), 7.38 – 7.21 (m, 5H, overlapped), 7.11 – 7.05 (m, 4H), 6.90 (d,  $J = 3.0$  Hz, 1H), 6.61 (s, 1H), 6.45 (s, 1H), 5.99 (d,  $J = 3.2$  Hz, 1H), 5.65 (s, 1H), 3.80 (s, 3H, overlapped), 3.71 (s, 3H).

*Methyl 2-methyl-3-oxo-1-phenyl-2,3,6,7-tetrahydro-3a,6-epoxyisoindole-7a(1H)-carboxylate (4t)*

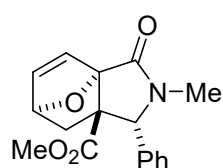

Under standard conditions, no reaction was observed.

*Methyl 1-(4-methoxyphenyl)-3-oxo-2-phenyl-2,3,6,7-tetrahydro-3a,6-epoxyisoindole-7a(1H)-carboxylate (4u)*

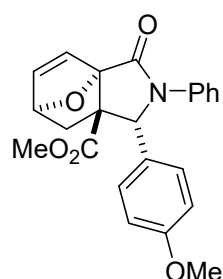

Purification by column chromatography (eluent: petroleum ether/EtOAc = 4:1). White solid (77.4 mg, 99% yield, dr > 20:1), m.p.: 152.2-153.4 °C;  $^1\text{H}$  NMR (400 MHz,  $\text{CDCl}_3$ )  $\delta$  7.47 (d,  $J = 7.9$  Hz, 2H), 7.37 (brs, 1H), 7.30 (d,  $J = 7.6$  Hz, 2H), 7.14 (t,  $J = 7.3$  Hz, 1H), 7.02 (brs, 1H), 6.84 (d,  $J = 8.2$  Hz, 2H), 6.64 (d,  $J = 5.8$  Hz, 1H), 6.58 (d,  $J = 5.7$  Hz, 1H), 5.37 (s, 1H), 4.99 (d,  $J = 3.9$  Hz, 1H), 3.78 (s, 3H), 3.77 (s, 3H), 1.97 (d,  $J = 12.2$  Hz, 1H), 1.72 (dd,  $J = 12.1, 4.4$  Hz, 1H).  $^{13}\text{C}$  NMR (101 MHz,  $\text{CDCl}_3$ )  $\delta$  173.0, 167.2, 159.4, 140.1, 138.2, 133.0, 129.9, 129.0, 128.8, 126.1, 123.2, 114.3, 113.7, 94.1, 82.3, 69.1, 59.6, 55.3, 53.0, 34.0. HRMS (ESI)  $m/z$ :  $[\text{M} + \text{H}]^+$  Calcd for  $\text{C}_{23}\text{H}_{22}\text{NO}_5^+$  392.1492, found 392.1499.

*Methyl 1-(4-chlorophenyl)-3-oxo-2-phenyl-2,3,6,7-tetrahydro-3a,6-epoxyisoindole-7a(1H)-carboxylate (4v)*

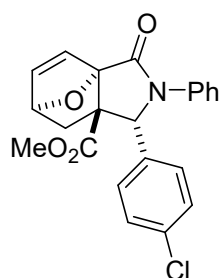

Purification by column chromatography (eluent: petroleum ether/EtOAc = 4:1). White solid (74.2 mg, 94% yield, dr > 20:1), m.p.: 172.1-173.3 °C; <sup>1</sup>H NMR (400 MHz, CDCl<sub>3</sub>) δ 7.45 (d, *J* = 8.0 Hz, 2H), 7.38 (brs, 1H), 7.33 – 7.27 (m, 4H), 7.16 (t, *J* = 7.3 Hz, 1H), 7.07 (brs, 1H), 6.64 (d, *J* = 5.7 Hz, 1H), 6.59 (d, *J* = 5.7 Hz, 1H), 5.41 (s, 1H), 4.99 (d, *J* = 2.9 Hz, 1H), 3.77 (s, 3H), 1.99 (d, *J* = 12.3 Hz, 1H), 1.68 (dd, *J* = 12.2, 4.5 Hz, 1H). <sup>13</sup>C NMR (101 MHz, CDCl<sub>3</sub>) δ 172.7, 167.1, 140.2, 137.9, 135.5, 134.2, 132.8, 130.1, 129.6, 129.3, 129.1, 128.6, 126.3, 123.1, 94.1, 82.4, 68.8, 59.3, 53.1, 34.1. HRMS (ESI) *m/z*: [M + H]<sup>+</sup> Calcd for C<sub>22</sub>H<sub>19</sub>ClNO<sub>4</sub><sup>+</sup> 396.0997, found 396.1002.

*Methyl 3-oxo-2-phenyl-1-(4-(trifluoromethyl)phenyl)-2,3,6,7-tetrahydro-3a,6-epoxyisoindole-7a(1H)-carboxylate (4w)*

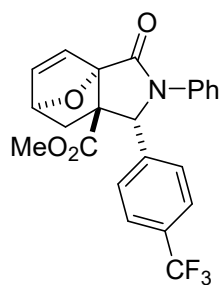

Purification by column chromatography (eluent: petroleum ether/EtOAc = 4:1). White solid (70.4 mg, 82% yield, dr > 20:1), m.p.: 155.1-156.3 °C; <sup>1</sup>H NMR (400 MHz, CDCl<sub>3</sub>) δ 7.58 (brs, 3H), 7.46 (d, *J* = 7.9 Hz, 2H), 7.31 (t, *J* = 7.7 Hz, 2H), 7.25 (brs, 1H), 7.17 (t, *J* = 7.2 Hz, 1H), 6.65 (d, *J* = 5.8 Hz, 1H), 6.60 (d, *J* = 5.7 Hz, 1H), 5.51 (s, 1H), 4.99 (d, *J* = 4.0 Hz, 1H), 3.79 (s, 3H), 2.01 (d, *J* = 12.4 Hz, 1H), 1.62 (dd, *J* = 12.1, 4.3 Hz, 1H). <sup>13</sup>C NMR (101 MHz, CDCl<sub>3</sub>) δ 172.5, 167.1, 141.1, 140.2, 137.8, 132.7, 129.2, 126.4, 125.4, 123.0, 94.1, 82.4, 68.8, 59.3, 53.2, 34.1. <sup>19</sup>F NMR (376 MHz, CDCl<sub>3</sub>) δ -62.60. HRMS (ESI) *m/z*: [M + H]<sup>+</sup> Calcd for C<sub>23</sub>H<sub>19</sub>F<sub>3</sub>NO<sub>4</sub><sup>+</sup> 430.1261, found 430.1240.

*Methyl*                    *1-(4-(methoxycarbonyl)phenyl)-3-oxo-2-phenyl-2,3,6,7-tetrahydro-3a,6-epoxyisoindole-7a(1H)-carboxylate (4x)*

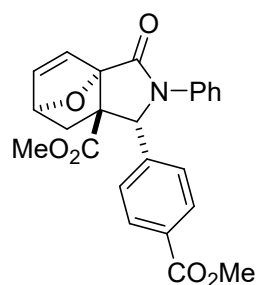

Purification by column chromatography (eluent: petroleum ether/EtOAc = 4:1). White solid (80.5 mg, 96% yield, dr > 20:1), m.p.: 186.4-187.7 °C; <sup>1</sup>H NMR (400 MHz, CDCl<sub>3</sub>) δ 8.00 (brs, 2H), 7.52 (s, 1H), 7.47 (d, *J* = 7.8 Hz, 2H), 7.30 (d, *J* = 7.5 Hz, 2H), 7.23 (brs, 1H), 7.14 (t, *J* = 7.4 Hz, 1H), 6.64 (d, *J* = 5.8 Hz, 1H), 6.59 (d, *J* = 5.7 Hz, 1H), 5.49 (s, 1H), 4.96 (d, *J* = 3.3 Hz, 1H), 3.90 (s, 3H), 3.78 (s, 3H), 1.99 (d, *J* = 12.3 Hz, 1H), 1.64 (dd, *J* = 12.3, 4.4 Hz, 1H). <sup>13</sup>C NMR (101 MHz, CDCl<sub>3</sub>) δ 172.6, 167.1, 166.6, 142.1, 140.2, 137.9, 132.7, 130.2, 129.7, 129.1, 128.8, 128.4, 126.3, 123.0, 94.1, 82.3, 69.0, 59.3, 53.2, 52.3, 34.0. HRMS (ESI) *m/z*: [M + H]<sup>+</sup> Calcd for C<sub>24</sub>H<sub>22</sub>NO<sub>6</sub><sup>+</sup> 420.1442, found 420.1454.

*Methyl*                    *1-(2-methoxyphenyl)-3-oxo-2-phenyl-2,3,6,7-tetrahydro-3a,6-epoxyisoindole-7a(1H)-carboxylate (4y)*

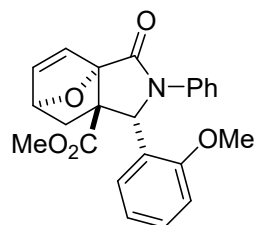

Purification by column chromatography (eluent: petroleum ether/EtOAc = 4:1). White solid (75.1 mg, 96% yield, dr > 20:1), m.p.: 214.5-215.9 °C; <sup>1</sup>H NMR (400 MHz, CDCl<sub>3</sub>) δ 7.57 (d, *J* = 7.8 Hz, 2H), 7.30 (t, *J* = 7.8 Hz, 2H), 7.23 (t, *J* = 7.5 Hz, 2H), 7.13 (t, *J* = 7.2 Hz, 1H), 6.89 – 6.86 (m, 2H), 6.60 – 6.56 (m, 2H), 5.84 (s, 1H), 4.90 (d, *J* = 3.5 Hz, 1H), 3.85 (s, 3H), 3.76 (s, 3H), 2.08 (d, *J* = 12.2 Hz, 1H), 1.54 (dd, *J* = 12.2, 4.4 Hz, 1H). <sup>13</sup>C NMR (101 MHz, CDCl<sub>3</sub>) δ 172.7, 167.6, 156.3, 140.2, 138.4, 132.4, 129.1, 128.9, 128.8, 125.6, 125.0, 122.3, 120.8, 109.7, 94.5, 82.1, 62.9, 58.6, 55.5, 52.9, 33.7. HRMS (ESI) *m/z*: [M + H]<sup>+</sup> Calcd for C<sub>23</sub>H<sub>22</sub>NO<sub>5</sub><sup>+</sup> 392.1492, found 392.1499.

*Methyl 1-(2-chlorophenyl)-3-oxo-2-phenyl-2,3,6,7-tetrahydro-3a,6-epoxyisoindole-7a(1H)-carboxylate (4z)*

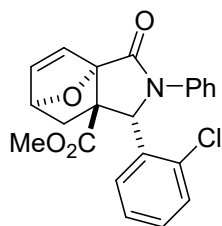

Purification by column chromatography (eluent: petroleum ether/EtOAc = 4:1). White solid (77.4 mg, 98% yield, dr > 20:1), m.p.: 165.7-166.2 °C; <sup>1</sup>H NMR (400 MHz, CDCl<sub>3</sub>) δ 7.54 (d, *J* = 7.7 Hz, 2H), 7.41 – 7.28 (m, 4H), 7.21 (t, *J* = 6.0 Hz, 2H), 7.15 (t, *J* = 7.2 Hz, 2H), 6.63 – 6.56 (m, 2H), 5.92 (s, 1H), 4.93 (d, *J* = 3.6 Hz, 1H), 3.77 (s, 3H), 2.19 (d, *J* = 12.4 Hz, 1H), 1.58 (dd, *J* = 12.4, 4.8 Hz, 1H). <sup>13</sup>C NMR (101 MHz, CDCl<sub>3</sub>) δ 172.2, 167.4, 140.4, 138.0, 134.5, 133.5, 132.1, 130.0, 129.4, 129.2, 129.1, 127.2, 125.9, 122.2, 94.7, 82.3, 65.4, 58.5, 53.1, 33.7. HRMS (ESI) *m/z*: [M + H]<sup>+</sup> Calcd for C<sub>22</sub>H<sub>19</sub>ClNO<sub>4</sub><sup>+</sup> 396.0997, found 396.1002.

*Methyl 3-oxo-2-phenyl-1-(thiophen-2-yl)-2,3,6,7-tetrahydro-3a,6-epoxyisoindole-7a(1H)-carboxylate (4aa)*

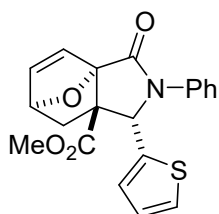

Purification by column chromatography (eluent: petroleum ether/EtOAc = 4:1). White solid (69.7 mg, 95% yield, dr > 20:1), m.p.: 166.6-167.4 °C; <sup>1</sup>H NMR (400 MHz, CDCl<sub>3</sub>) δ 7.40 (d, *J* = 7.9 Hz, 2H), 7.36 – 7.27 (m, 3H), 7.19 (t, *J* = 7.4 Hz, 1H), 7.01 (d, *J* = 3.6 Hz, 1H), 6.93 (t, *J* = 4.1 Hz, 1H), 6.65 – 6.60 (m, 2H), 5.65 (s, 1H), 5.13 (d, *J* = 4.1 Hz, 1H), 3.78 (s, 3H), 2.06 (d, *J* = 12.2 Hz, 1H), 1.98 (dd, *J* = 12.2, 4.2 Hz, 1H). <sup>13</sup>C NMR (101 MHz, CDCl<sub>3</sub>) δ 172.5, 166.6, 140.3, 137.7, 132.3, 129.1, 128.6, 127.1, 126.8, 126.7, 124.1, 93.9, 82.4, 65.8, 59.5, 53.1, 34.1. HRMS (ESI) *m/z*: [M + H]<sup>+</sup> Calcd for C<sub>20</sub>H<sub>18</sub>NO<sub>4</sub>S<sup>+</sup> 368.0951, found 368.0987.

*Benzyl 3-oxo-1,2-diphenyl-2,3,6,7-tetrahydro-3a,6-epoxyisoindole-7a(1H)-carboxylate (4ab)*

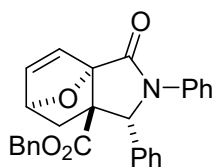

Purification by column chromatography (eluent: petroleum ether/EtOAc = 4:1). White solid (80.4 mg, 92% yield, dr > 20:1), m.p.: 133.7-134.6 °C; <sup>1</sup>H NMR (400 MHz, CDCl<sub>3</sub>) δ 7.43 (brs, 1H), 7.35 – 7.25 (m, 10H), 7.22 (t, *J* = 7.6 Hz, 2H), 7.11 (t, *J* = 7.2 Hz, 1H), 7.06 – 7.02 (m, 1H), 6.55 – 6.50 (m, 2H), 5.32 (s, 1H), 5.27 (d, *J* = 12.0 Hz, 1H), 5.13 (d, *J* = 12.0 Hz, 1H), 4.96 (d, *J* = 4.0 Hz, 1H), 1.98 (d, *J* = 12.2 Hz, 1H), 1.67 (dd, *J* = 12.2, 4.2 Hz, 1H). <sup>13</sup>C NMR (101 MHz, CDCl<sub>3</sub>) δ 182.3, 172.0, 140.0, 138.1, 136.9, 135.0, 132.9, 132.8, 128.9, 128.8, 128.7, 128.6, 128.3, 127.5, 126.0, 123.6, 123.1, 94.1, 82.4, 69.4, 67.5, 59.6, 34.0. HRMS (ESI) *m/z*: [M + H]<sup>+</sup> Calcd for C<sub>28</sub>H<sub>24</sub>NO<sub>4</sub><sup>+</sup> 438.1700, found 438.1715.

*tert-Butyl 3-oxo-1,2-diphenyl-2,3,6,7-tetrahydro-3a,6-epoxyisoindole-7a(1H)-carboxylate (4ac)*

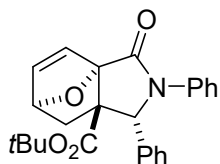

Purification by column chromatography (eluent: petroleum ether/EtOAc = 4:1). White solid (75.8 mg, 94% yield, dr > 20:1), m.p.: 182.4-183.2 °C; <sup>1</sup>H NMR (400 MHz, CDCl<sub>3</sub>) δ 7.50 (d, *J* = 7.8 Hz, 2H), 7.43 (brs, 1H), 7.34 – 7.26 (m, 5H), 7.12 (t, *J* = 7.2 Hz, 2H), 6.67 (d, *J* = 5.7 Hz, 1H), 6.59 (d, *J* = 5.9 Hz, 1H), 5.37 (s, 1H), 4.94 (d, *J* = 4.0 Hz, 1H), 1.94 (d, *J* = 12.2 Hz, 1H), 1.62 (dd, *J* = 12.1, 4.6 Hz, 1H), 1.46 (s, 9H). <sup>13</sup>C NMR (101 MHz, CDCl<sub>3</sub>) δ 171.2, 167.5, 140.0, 138.3, 137.2, 135.5, 132.8, 129.0, 128.3, 128.2, 125.8, 122.7, 94.0, 82.4, 69.7, 60.2, 33.7, 28.0. HRMS (ESI) *m/z*: [M + H]<sup>+</sup> Calcd for C<sub>25</sub>H<sub>26</sub>NO<sub>4</sub><sup>+</sup> 404.1856, found 404.1859.

*Methyl (E)-3-oxo-2-phenyl-1-styryl-2,3,6,7-tetrahydro-3a,6-epoxyisoindole-7a(1H)-carboxylate (4ad)*

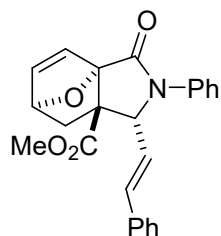

Purification by column chromatography (eluent: petroleum ether/EtOAc = 4:1). White solid (48 mg, 62% yield, dr = 5:1), m.p.: 141.4-142.7 °C; <sup>1</sup>H NMR (400 MHz, CDCl<sub>3</sub>) δ 7.49 (d, *J* = 8.0 Hz, 2H), 7.39 – 7.27 (m, 7H), 7.22 (t, *J* = 7.6 Hz, 1H), 6.65 – 6.62 (m, 2H), 6.46 (d, *J* = 16.1 Hz, 1H), 6.32 (dd, *J* = 16.0, 9.1 Hz, 1H), 5.26 (d, *J* = 4.5 Hz, 1H), 4.84 (d, *J* = 9.1 Hz, 1H), 3.76 (s, 3H), 2.53 (dd, *J* = 12.3, 4.6 Hz, 1H), 2.08 (d, *J* = 12.4 Hz, 1H). <sup>13</sup>C NMR (101 MHz, CDCl<sub>3</sub>) δ 172.6, 166.4, 139.8, 137.8, 135.6, 135.6, 132.3, 129.2, 128.8, 128.5, 127.4, 126.8, 126.8, 124.5, 93.9, 82.6, 69.2, 59.5, 53.0, 33.9. HRMS (ESI) *m/z*: [M + H]<sup>+</sup> Calcd for C<sub>24</sub>H<sub>22</sub>NO<sub>4</sub><sup>+</sup> 388.1543, found 388.1579.

*Methyl 1-cyclohexyl-3-oxo-2-phenyl-2,3,6,7-tetrahydro-3a,6-epoxyisoindole-7a(1H)-carboxylate (4ae)*

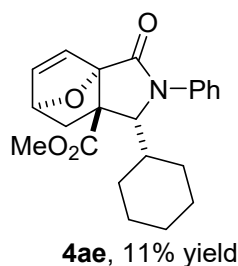

+

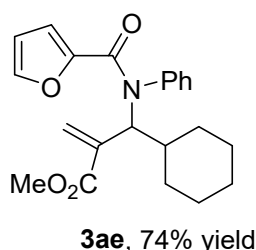

Under standard conditions, the reaction afforded a mixture of **4ae** and intermediate **3ae**, which could not be fully converted even upon prolonged reaction. The two components were separated by column chromatography (eluent: petroleum ether/EtOAc = 4:1).

Characterization data for **4ae**: White solid (8.1 mg, 11% yield, dr > 20:1), m.p.: 133.4-134.5 °C; <sup>1</sup>H NMR (400 MHz, CDCl<sub>3</sub>) δ 7.43 – 7.36 (m, 4H), 7.26 – 7.22 (m, 1H), 6.60 (d, *J* = 5.5 Hz, 1H), 6.52 (d, *J* = 5.7 Hz, 1H), 5.25 (d, *J* = 4.0 Hz, 1H), 4.14 (d, *J* = 7.6 Hz, 1H), 3.72 (s, 3H), 2.45 (dd, *J* = 12.4, 4.8 Hz, 1H), 2.26 (d, *J* = 12.4 Hz, 1H), 1.87 – 1.78 (m, 1H), 1.75 – 1.61 (m, 4H), 1.22 – 1.06 (m, 2H), 1.02 – 0.95 (m, 1H), 0.92 – 0.76 (m, 2H), 0.71 – 0.61 (m, 1H). <sup>13</sup>C NMR (101 MHz, CDCl<sub>3</sub>) δ 173.5, 166.8, 139.5, 139.3, 133.0, 129.0, 126.5, 124.8,



Methyl (1*R*,3*aS*,6*S*,7*aR*)-2-(benzyloxy)-3-oxo-1-phenyl-2,3,6,7-tetrahydro-3*a*,6-epoxyisoindole-7*a*(1*H*)-carboxylate (**4ag**)

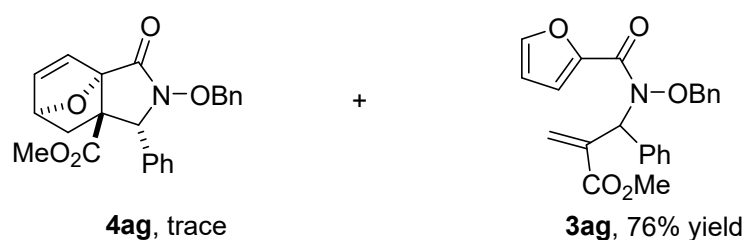

Under standard conditions, the reaction afforded product **4ag** in trace amount; while intermediate **3ag** was isolated as the major product by column chromatography (eluent: petroleum ether/EtOAc = 4:1). The intermediate failed to convert even upon prolonged reaction times or at elevated temperature (toluene, reflux).

Characterization data for **3ag**: Colorless oil (59 mg, 76% yield);  $^1\text{H}$  NMR (400 MHz,  $\text{CDCl}_3$ )  $\delta$  7.60 (d,  $J = 1.7$  Hz, 1H), 7.53 (d,  $J = 8.0$  Hz, 2H), 7.43 – 7.33 (m, 3H), 7.32 – 7.27 (m, 3H), 7.21 (dd,  $J = 3.5, 0.8$  Hz, 1H), 7.09 – 7.04 (m, 2H), 6.82 (s, 1H), 6.50 (s, 1H), 6.49 (dd,  $J = 3.6, 1.6$  Hz, 1H), 5.95 (d,  $J = 1.6$  Hz, 1H), 4.60 (d,  $J = 9.1$  Hz, 1H), 4.05 (d,  $J = 9.1$  Hz, 1H), 3.67 (s, 3H).  $^{13}\text{C}$  NMR (101 MHz,  $\text{CDCl}_3$ )  $\delta$  166.1, 160.2, 146.0, 145.6, 138.3, 135.9, 134.0, 129.7, 129.2, 128.8, 128.7, 128.5, 128.5, 127.6, 118.4, 111.7, 78.8, 62.1, 52.2. HRMS (ESI)  $m/z$ :  $[\text{M} + \text{H}]^+$  Calcd for  $\text{C}_{23}\text{H}_{22}\text{NO}_5^+$  392.1492, found 392.1499.

Methyl 2-benzoyl-3-oxo-1-phenyl-2,3,6,7-tetrahydro-3*a*,6-epoxyisoindole-7*a*(1*H*)-carboxylate (**4ah**)

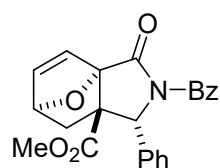

Purification by column chromatography (eluent: petroleum ether/EtOAc = 4:1). White solid (59 mg, 76% yield, dr > 20:1), m.p.: 126.3–127.6 °C;  $^1\text{H}$  NMR (400 MHz,  $\text{CDCl}_3$ )  $\delta$  7.74 (dd,  $J = 8.8, 1.3$  Hz, 2H), 7.57 – 7.51 (m, 1H), 7.46 – 7.41 (m, 3H), 7.38 – 7.34 (m, 3H), 7.31 – 7.27 (m, 1H), 6.58 (dd,  $J = 5.9, 1.6$  Hz, 1H), 6.52 (d,  $J = 5.9$  Hz, 1H), 5.89 (s, 1H), 5.04 (dd,  $J = 4.5, 1.6$  Hz, 1H), 3.77 (s, 3H), 1.98 (d,  $J = 12.3$  Hz, 1H), 1.78 (dd,  $J = 12.3, 4.6$  Hz, 1H).  $^{13}\text{C}$  NMR (101 MHz,  $\text{CDCl}_3$ )  $\delta$  172.4, 169.8, 167.9, 140.4, 137.2, 133.8, 132.7, 131.7,

129.1, 128.8, 128.4, 128.2, 94.1, 82.7, 65.1, 58.3, 53.2, 34.2. HRMS (ESI)  $m/z$ :  $[M + H]^+$   
Calcd for  $C_{23}H_{20}NO_5^+$  390.1336, found 390.1320.

*Methyl 2-(benzylideneamino)-3-oxo-1-phenyl-2,3,6,7-tetrahydro-3a,6-epoxyisoindole-7a(1H)-carboxylate (4ai)*

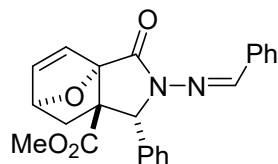

Purification by column chromatography (eluent: petroleum ether/EtOAc = 4:1). White solid (69.9 mg, 90% yield, dr > 20:1), m.p.: 162.6-163.7 °C;  $^1H$  NMR (400 MHz,  $CDCl_3$ )  $\delta$  8.07 (s, 1H), 7.62 (d,  $J = 7.3$  Hz, 2H), 7.45 – 7.29 (m, 6H), 7.24 (d,  $J = 7.8$  Hz, 2H), 6.63 (d,  $J = 5.8$  Hz, 1H), 6.57 (d,  $J = 5.8$  Hz, 1H), 5.38 (s, 1H), 4.96 (d,  $J = 4.4$  Hz, 1H), 3.75 (s, 3H), 1.98 (d,  $J = 12.2$  Hz, 1H), 1.70 (dd,  $J = 12.2, 4.4$  Hz, 1H).  $^{13}C$  NMR (101 MHz,  $CDCl_3$ )  $\delta$  172.6, 164.6, 148.6, 140.1, 135.3, 133.9, 132.7, 130.6, 128.6, 127.9, 92.5, 82.3, 67.5, 59.2, 53.2, 33.4. HRMS (ESI)  $m/z$ :  $[M + H]^+$  Calcd for  $C_{23}H_{21}N_2O_4^+$  389.1496, found 389.1520.

*2-Benzyl 7a-methyl 3-oxo-1-phenyl-6,7-dihydro-3a,6-epoxyisoindole-2,7a(1H,3H)-dicarboxylate (4aj)*

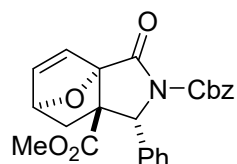

Purification by column chromatography (eluent: petroleum ether/EtOAc = 4:1). White solid (77 mg, 92% yield, dr > 20:1), m.p.: 126.3–127.6 °C;  $^1H$  NMR (400 MHz,  $CDCl_3$ )  $\delta$  7.37 – 7.30 (m, 4H), 7.26 – 7.10 (m, 4H), 7.08 – 7.02 (m, 2H), 6.56 (s, 2H), 5.49 (s, 1H), 5.24 (d,  $J = 12.5$  Hz, 1H), 5.10 (d,  $J = 12.5$  Hz, 1H), 4.94 (d,  $J = 4.4$  Hz, 1H), 3.74 (s, 3H), 1.93 (d,  $J = 12.3$  Hz, 1H), 1.70 (dd,  $J = 12.3, 4.5$  Hz, 1H).  $^{13}C$  NMR (101 MHz,  $CDCl_3$ )  $\delta$  172.3, 166.7, 151.1, 140.4, 137.6, 134.8, 132.2, 128.5, 128.3, 128.2, 127.7, 93.3, 82.6, 68.4, 66.5, 58.4, 53.2, 34.2. HRMS (ESI)  $m/z$ :  $[M + H]^+$  Calcd for  $C_{24}H_{22}NO_6^+$  420.1442, found 420.1454.

*2-(tert-Butyl) 7a-methyl (1R,3aS,6S,7aR)-3-oxo-1-phenyl-6,7-dihydro-3a,6-epoxyisoindole-2,7a(1H,3H)-dicarboxylate (4ak)*



137.5, 134.74, 134.67, 133.2, 133.1, 130.4, 129.4, 128.8, 128.7, 128.2, 126.7, 123.8, 123.7, 119.5, 111.8, 64.3, 52.0. HRMS (ESI)  $m/z$ :  $[M + H]^+$  Calcd for  $C_{24}H_{19}N_2O_6^+$  431.1238, found 431.1218.

## IV. Control experiments

a.

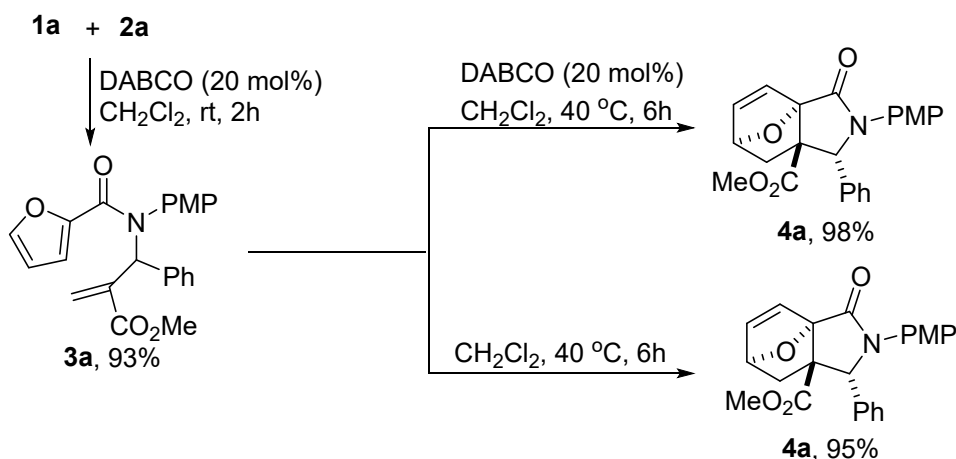

### Step 1: Preparation of Intermediate **3a**

To a sealed tube containing compound **1a** (108.5 mg, 0.5 mmol), and **2a** (175.4 mg, 0.6 mmol, 1.2 equiv) in CH<sub>2</sub>Cl<sub>2</sub> (5.0 mL) was added DABCO (11.2 mg, 0.1 mmol, 20 mol%). The reaction mixture was stirred at room temperature for 2 h. Upon completion, the solvent was removed in *vacuo*, and the crude product was purified by flash chromatography on silica gel (petroleum ether/EtOAc= 4:1) to afford intermediate **3a** (181.9 mg, 93%). Due to its instability at ambient temperature, **3a** used immediately in subsequent reactions.

### Step 2: Conversion to Product **4a**

Intermediate **3a** (78.2 mg, 0.2 mmol) and DABCO (4.5 mg, 0.04 mmol, 20 mol%) were dissolved in CH<sub>2</sub>Cl<sub>2</sub> (2 mL) in a sealed tube and heated to 40 °C for 6 h. Standard workup and purification afforded product **4a** in 98% yield (76.7 mg).

### Control Experiment:

As a control, the reaction was performed under identical conditions without DABCO, product **4a** was isolated in 95% yield.

b.

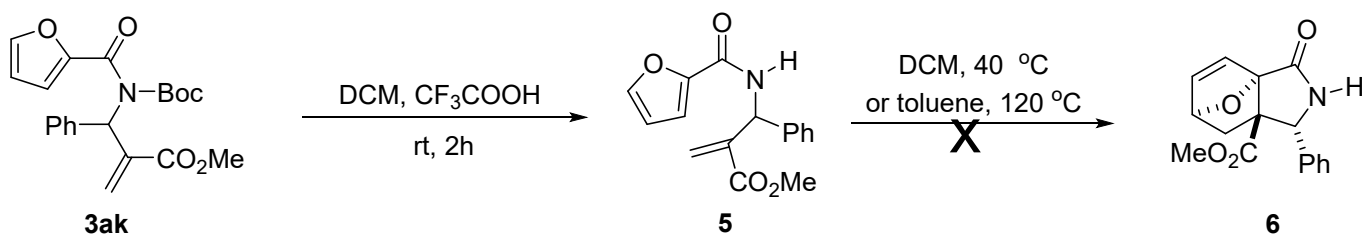

### Step 1: Preparation of Intermediate **5**

Compound **3ak** (115.5 mg, 0.3 mmol) was treated trifluoroacetic acid (0.07 mL, 0.9 mmol, 3 equiv) in CH<sub>2</sub>Cl<sub>2</sub> (3 mL) at room temperature for 2 h. Standard workup and purification by flash chromatography on silica gel (petroleum ether/EtOAc = 4:1) afforded compound **5** as a colorless oil (84.7 mg, 99%). <sup>1</sup>H NMR (400 MHz, CDCl<sub>3</sub>) δ 7.58 (d, *J* = 9.0 Hz, 1H), 7.47 (dd, *J* = 1.8, 0.8 Hz, 1H), 7.34 (d, *J* = 4.4 Hz, 4H), 7.28 (dd, *J* = 4.9, 3.7 Hz, 1H), 7.18 (dd, *J* = 3.6, 0.8 Hz, 1H), 6.52 (dd, *J* = 3.5, 1.8 Hz, 1H), 6.42 (d, *J* = 0.8 Hz, 1H), 6.19 (d, *J* = 9.0 Hz, 1H), 6.01 (d, *J* = 0.9 Hz, 1H), 3.72 (s, 3H). <sup>13</sup>C NMR (101 MHz, CDCl<sub>3</sub>) δ 166.3, 157.7, 147.5, 144.4, 139.2, 138.9, 128.8, 128.0, 127.7, 126.5, 115.2, 112.4, 54.5, 52.2.

*Step 2: IMDA reaction attempts*

Subsequent IMDA attempts proved unsuccessful: No formation of the desired product **6** was detected by LC-MS after stirring compound **5** (57.0 mg, 0.2 mmol) in CH<sub>2</sub>Cl<sub>2</sub> at 40 °C for 24 h. Similarly, heating in toluene at 110°C for 24 h also failed to product **6**.

## V. Gram-scale synthesis and chemical transformations

### a. Gram-scale reaction of 4a

A mixture of **1a** (1.08 g, 5.0 mmol), MBH carbonate **2a** (1.75 mg, 6.0 mmol, 1.2 equiv), and DABCO (112 mg, 1.0 mmol, 20 mol%) was dissolved in DCM (40.0 mL). The reaction mixture was stirred at 40 °C until completion, as monitored by TLC. After removing the solvent under reduced pressure, the residue was purified by flash column chromatography on silica gel (eluent: petroleum ether/EtOAc = 4:1), to afford product **4a** (1.9 g, 97% yield).

### b. Chemical transformations

Synthesis of compound **7**:

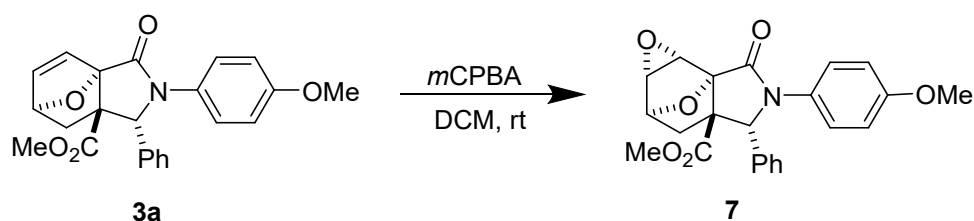

A solution of **3a** (78 mg, 0.2 mmol) in dichloromethane (2.0 mL) was cooled to 0 °C. *m*-CPBA (104 mg, 0.6 mmol, 3.0 equiv) was added, and the mixture was warmed to room temperature and stirred for 3 h. Upon completion, the reaction mixture was diluted with additional dichloromethane and washed sequentially with saturated aqueous NaHCO<sub>3</sub> and brine. The organic phase was dried over Na<sub>2</sub>SO<sub>4</sub>, filtered and concentrated under reduced pressure. The crude residue was purified by flash column chromatography on silica gel (eluent: petroleum ether/EtOAc = 5/1) to afford the desired product **7** (70 mg, 86% yield) as a single isomer. White solid, m.p.: 129.7-130.7 °C. <sup>1</sup>H NMR (400 MHz, CDCl<sub>3</sub>) δ 7.52 (d, *J* = 8.0 Hz, 1H), 7.39 – 7.27 (m, 5H), 7.01 (d, *J* = 6.9 Hz, 1H), 6.80 (d, *J* = 9.0 Hz, 2H), 5.26 (s, 1H), 4.48 (d, *J* = 5.0 Hz, 1H), 3.89 (s, 3H), 3.72 (s, 3H), 3.65 (d, *J* = 3.2 Hz, 1H), 3.41 (d, *J* = 3.2 Hz, 1H), 2.20 (d, *J* = 13.2 Hz, 1H), 1.62 (dd, *J* = 13.2, 5.1 Hz, 1H). <sup>13</sup>C NMR (101 MHz, CDCl<sub>3</sub>) δ 171.9, 165.9, 157.8, 136.2, 130.7, 129.2, 128.6, 128.5, 128.3, 125.1,

114.3, 89.5, 78.3, 70.4, 61.6, 55.4, 53.5, 48.9, 47.6, 34.7. HRMS (ESI)  $m/z$ :  $[M + Na]^+$  Calcd for  $C_{23}H_{21}NNaO_6^+$  430.1261, found 430.1240.

### Synthesis of compound **8**:

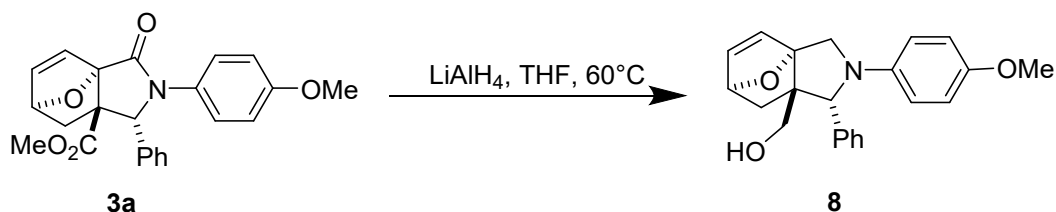

$LiAlH_4$  (30 mg, 0.8 mmol, 4.0 equiv) was slowly added to a suspension of **3a** (78 mg, 0.2 mmol) in anhydrous THF (2.0 mL) at room temperature under  $N_2$  atmosphere. After addition, the mixture was heated to  $60\text{ }^\circ\text{C}$  and stirred for 12 h. The reaction was carefully quenched at  $0\text{ }^\circ\text{C}$  by sequential dropwise addition of  $H_2O$  (2.0 mL), 15% aqueous NaOH (2.0 mL) and  $H_2O$  (2.0 mL) again. The resulting mixture was stirred at room temperature for 30 min, then filtered through a pad of Celite. The filtrate was extracted with diethyl ether, and the combined organic extracts were washed with brine, dried over anhydrous  $Na_2SO_4$ , filtered, and concentrated in *vacuo*. The crude residue was purified by flash column chromatography on silica gel (eluent: petroleum ether/EtOAc = 10:1) to afford product **8** (31 mg, 67% yield) as a white solid, m.p.:  $90.2\text{--}91.1\text{ }^\circ\text{C}$ .  $^1H$  NMR (400 MHz,  $CDCl_3$ )  $\delta$  7.40 – 7.26 (m, 5H), 6.79 – 6.71 (m, 4H), 5.71 – 5.58 (m, 2H), 5.46 (s, 1H), 4.36 (s, 1H), 4.01 (dd,  $J = 7.5, 0.9$  Hz, 1H), 3.72 (s, 3H), 3.61 (d,  $J = 7.5$  Hz, 1H), 2.76 (d,  $J = 19.7$  Hz, 1H), 2.33 – 2.24 (m, 2H), 2.17 (ddt,  $J = 18.0, 4.5, 2.5$  Hz, 1H), 2.04 (t,  $J = 10.8$  Hz, 1H).  $^{13}C$  NMR (101 MHz,  $CDCl_3$ )  $\delta$  153.6, 140.1, 138.9, 129.0, 127.6, 126.8, 123.4, 122.6, 117.0, 114.7, 90.3, 78.4, 76.4, 73.1, 55.6, 49.7, 30.7, 22.4. HRMS (ESI)  $m/z$ :  $[M + Na]^+$  Calcd for  $C_{22}H_{23}NNaO_3^+$  372.1570, found 372.1599.

### Synthesis of compound **9**:

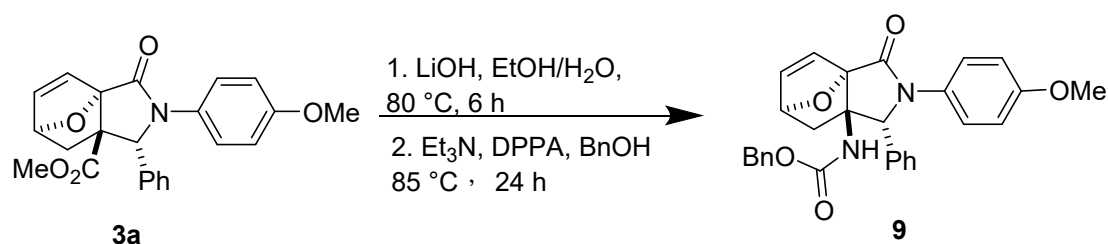

A solution of compound **3a** (78 mg, 0.2 mmol) in EtOH/H<sub>2</sub>O (2:1 v/v, 3.0 mL) was treated with LiOH (5.7 mg, 0.24 mmol, 1.2 equiv) and stirred at 80 °C for 6 h. After cooling, the mixture was neutralized with 1N HCl and extracted with dichloromethane. The combined organics were dried over anhydrous Na<sub>2</sub>SO<sub>4</sub> and concentrated in *vacuo* to afford the crude carboxylic acid, which was used directly in the next step without further purification.

To a solution of the crude carboxylic acid and Et<sub>3</sub>N (22 mg, 0.22 mmol, 1.1 equiv) in dry toluene (2.0 mL) was added dropwise diphenylphosphoryl azide (DPPA, 61 mg, 0.22 mmol, 1.1 equiv). The reaction mixture was stirred at room temperature for 4 h, then BnOH (65 mg, 0.6 mmol, 3.0 equiv) was added. The mixture was heated to 85 °C and stirred for 24 h. After cooling to room temperature, the reaction was quenched with H<sub>2</sub>O and extracted with EtOAc. The combined organics were dried over anhydrous Na<sub>2</sub>SO<sub>4</sub>, filtered, and concentrated. The crude residue was purified by flash column chromatography on silica gel (eluent: petroleum ether/EtOAc = 5:1) to yield the desired product **6** (56 mg, 58% yield) as a white solid, m.p.: 188.7-189.7 °C. <sup>1</sup>H NMR (400 MHz, CDCl<sub>3</sub>) δ 7.67 – 7.24 (m, 10H), 7.21 (s, 2H), 6.70 (d, *J* = 8.7 Hz, 4H), 5.61 – 5.44 (m, 2H), 5.18 – 5.08 (m, 2H), 4.87 (d, *J* = 4.1 Hz, 1H), 3.68 (s, 3H), 2.14 (d, *J* = 8.1 Hz, 1H), 1.37 (d, *J* = 12.5 Hz, 1H). <sup>13</sup>C NMR (101 MHz, CDCl<sub>3</sub>) δ 166.6, 157.2, 156.0, 142.5, 137.4, 135.9, 131.1, 131.0, 128.7, 128.5, 128.3, 127.9, 124.1, 114.1, 93.6, 82.7, 80.0, 67.2, 66.3, 55.4, 39.6, 29.8. HRMS (ESI) *m/z*: [M + H]<sup>+</sup> Calcd for C<sub>29</sub>H<sub>27</sub>N<sub>2</sub>O<sub>5</sub><sup>+</sup> 483.1914, found 483.1904.

#### Synthesis of compound **10**:

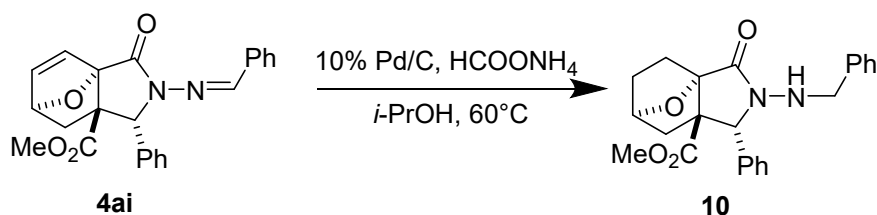

A sealed tube was charged with compound **4ai** (78 mg, 0.2 mmol), 10% Pd/C (21 mg), and isopropyl alcohol (5.0 mL). To the stirring mixture were added ammonium formate (4.2 mg, 5.0 mmol) and H<sub>2</sub>O (96 μL, 6 mmol). The tube was then sealed with a Teflon cap and immersed in a preheated oil bath at 60 °C for 4 hours. After completion, the mixture was cooled to room temperature and filtered through a short pad of Celite, and the filtrate was concentrated under reduced pressure. The crude residue was purified by flash column

chromatography on silica gel (gradient elution: petroleum ether/EtOAc from 100:1 to 5:1) to afford product **10** (72 mg, 92% yield) as a white solid, m.p.:110.7-111.3°C. <sup>1</sup>H NMR (400 MHz, CDCl<sub>3</sub>) δ 7.36 (brs, 2H), 7.32 – 7.21 (m, 7H), 6.92 (brs, 1H), 4.88 (t, *J* = 5.2 Hz, 1H), 4.81 (s, 1H), 4.51 (t, *J* = 5.2 Hz, 1H), 4.18 (dd, *J* = 12.7, 4.8 Hz, 1H), 4.09 (dd, *J* = 12.7, 4.7 Hz, 1H), 3.66 (s, 3H), 2.21 (d, *J* = 12.7 Hz, 1H), 2.13 – 2.02 (m, 1H), 1.97 – 1.88 (m, 1H), 1.65 – 1.56 (m, 2H), 1.40 (ddd, *J* = 12.7, 5.1, 2.3 Hz, 1H). <sup>13</sup>C NMR (101 MHz, CDCl<sub>3</sub>) δ 173.4, 167.8, 137.7, 136.6, 129.9, 129.0, 128.8, 128.53, 128.50, 127.8, 90.1, 80.6, 68.8, 59.8, 53.9, 53.0, 38.5, 29.1, 27.0. HRMS (ESI) *m/z*: [M + H]<sup>+</sup> Calcd for C<sub>23</sub>H<sub>25</sub>N<sub>2</sub>O<sub>4</sub><sup>+</sup> 393.1809, found 393.1802.



|                    |                 |                                    |
|--------------------|-----------------|------------------------------------|
| Hall group         | C -2yc          | C -2yc                             |
| Moiety formula     | C22 H18 Cl N O4 | ?                                  |
| Sum formula        | C22 H18 Cl N O4 | C22 H18 Cl N O4                    |
| Mr                 | 395.82          | 395.82                             |
| Dx,g cm-3          | 1.365           | 1.365                              |
| Z                  | 4               | 4                                  |
| Mu (mm-1)          | 0.227           | 0.227                              |
| F000               | 824.0           | 824.0                              |
| F000'              | 824.98          |                                    |
| h,k,lmax           | 17,22,11        | 17,22,11                           |
| Nref               | 4431[ 2221]     | 4403                               |
| Tmin,Tmax          | 0.976,0.984     |                                    |
| Tmin'              | 0.967           |                                    |
| Correction method= | Not given       |                                    |
| Data completeness= | 1.98/0.99       | Theta(max)= 27.505                 |
| R(reflections)=    | 0.0450( 4037)   | wR2(reflections)=<br>0.1411( 4403) |
| S =                | 1.106           | Npar= 255                          |

## VII. Computational Details

Density functional theory (DFT) calculations were performed using Gaussian 16.<sup>[23]</sup> Geometry optimizations were performed at the B3LYP level of theory with the 6-311G(d, p) basis set, without any symmetry constraints. Frequency calculations at the same level were conducted to verify the nature of all stationary points: all intermediates were confirmed to be true minima on the potential energy surface with no imaginary frequencies, while transition states were identified as first-order saddle points with one and only one imaginary frequency. Thermal corrections were obtained from these frequency analyses. To account for solvent effects, the SMD implicit solvation model was employed using dichloromethane (DCM) as the solvent.

### Compound 3a

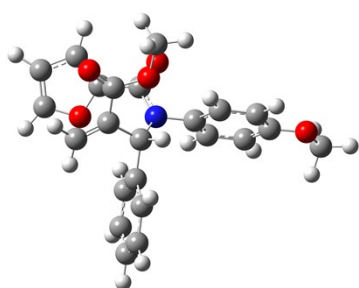

|                                              |                             |
|----------------------------------------------|-----------------------------|
| Zero-point correction=                       | 0.393466 (Hartree/Particle) |
| Thermal correction to Energy=                | 0.419857                    |
| Thermal correction to Enthalpy=              | 0.420801                    |
| Thermal correction to Gibbs Free Energy=     | 0.334440                    |
| Sum of electronic and zero-point Energies=   | -1319.880699                |
| Sum of electronic and thermal Energies=      | -1319.854308                |
| Sum of electronic and thermal Enthalpies=    | -1319.853364                |
| Sum of electronic and thermal Free Energies= | -1319.939725                |

---

| Center | Atomic | Forces (Hartrees/Bohr) |   |   |
|--------|--------|------------------------|---|---|
| Number | Number | X                      | Y | Z |

---

|    |   |              |              |              |
|----|---|--------------|--------------|--------------|
| 1  | 8 | 0.000001355  | -0.000003405 | 0.000003981  |
| 2  | 8 | 0.000005428  | -0.000011270 | 0.000009276  |
| 3  | 8 | -0.000002683 | 0.000003418  | 0.000002491  |
| 4  | 8 | -0.000001001 | -0.000000636 | 0.000004394  |
| 5  | 7 | -0.000003659 | -0.000000127 | 0.000002234  |
| 6  | 6 | 0.000000148  | -0.000000408 | -0.000000213 |
| 7  | 6 | -0.000000079 | 0.000000361  | 0.000000337  |
| 8  | 1 | -0.000000257 | 0.000000912  | 0.000000588  |
| 9  | 6 | -0.000000256 | 0.000000466  | 0.000000746  |
| 10 | 1 | -0.000000144 | 0.000000472  | 0.000001311  |
| 11 | 6 | 0.000001896  | -0.000000469 | -0.000000530 |
| 12 | 6 | 0.000000180  | -0.000001627 | -0.000000654 |
| 13 | 1 | 0.000000415  | -0.000001558 | -0.000000657 |
| 14 | 6 | 0.000000351  | -0.000001228 | -0.000000874 |
| 15 | 1 | -0.000000037 | -0.000001836 | -0.000001473 |
| 16 | 6 | 0.000008708  | 0.000011218  | -0.000005134 |
| 17 | 6 | 0.000002262  | -0.000011500 | 0.000002004  |
| 18 | 1 | -0.000000217 | 0.000002388  | 0.000000332  |
| 19 | 6 | -0.000021242 | -0.000013655 | 0.000010112  |
| 20 | 6 | 0.000004570  | -0.000004699 | -0.000013291 |
| 21 | 6 | 0.000026439  | 0.000011691  | 0.000004731  |
| 22 | 1 | -0.000007118 | 0.000003994  | -0.000002276 |
| 23 | 1 | -0.000001509 | 0.000004710  | -0.000008112 |
| 24 | 6 | 0.000000816  | -0.000004670 | -0.000013241 |
| 25 | 1 | 0.000001141  | -0.000005867 | 0.000004550  |
| 26 | 6 | -0.000005072 | 0.000010640  | 0.000006113  |
| 27 | 1 | 0.000000721  | -0.000001049 | 0.000003944  |
| 28 | 6 | -0.000011012 | 0.000007708  | 0.000007101  |
| 29 | 1 | 0.000001341  | -0.000001465 | 0.000003991  |
| 30 | 6 | 0.000002394  | 0.000001292  | -0.000003186 |

|    |   |              |              |              |
|----|---|--------------|--------------|--------------|
| 31 | 6 | -0.000002364 | -0.000002338 | -0.000002058 |
| 32 | 1 | 0.000000110  | -0.000000435 | -0.000000748 |
| 33 | 6 | -0.000000292 | 0.000000078  | -0.000002705 |
| 34 | 1 | -0.000000290 | -0.000001206 | -0.000003117 |
| 35 | 6 | 0.000000255  | 0.000000551  | -0.000003631 |
| 36 | 1 | -0.000000848 | 0.000000309  | -0.000004279 |
| 37 | 6 | -0.000001164 | 0.000001132  | -0.000002625 |
| 38 | 1 | -0.000001090 | 0.000001998  | -0.000003477 |
| 39 | 6 | -0.000000537 | 0.000002799  | -0.000002224 |
| 40 | 1 | -0.000001187 | 0.000001809  | -0.000002045 |
| 41 | 6 | 0.000000273  | -0.000000397 | 0.000001174  |
| 42 | 6 | 0.000000098  | 0.000002875  | 0.000003297  |
| 43 | 1 | 0.000000484  | 0.000001594  | 0.000002997  |
| 44 | 1 | -0.000000192 | 0.000002430  | 0.000003444  |
| 45 | 1 | 0.000000779  | 0.000000960  | 0.000003600  |
| 46 | 8 | 0.000000380  | -0.000000642 | -0.000000611 |
| 47 | 6 | 0.000000670  | -0.000000863 | -0.000001403 |
| 48 | 1 | 0.000000275  | -0.000001104 | -0.000001368 |
| 49 | 1 | 0.000000325  | -0.000001325 | -0.000002030 |
| 50 | 1 | 0.000000438  | -0.000002025 | -0.000000786 |

-----

**TS**

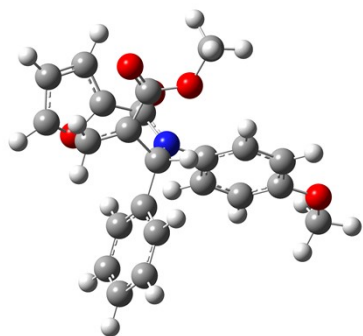

Zero-point correction=

0.393750 (Hartree/Particle)

|                                              |              |
|----------------------------------------------|--------------|
| Thermal correction to Energy=                | 0.418701     |
| Thermal correction to Enthalpy=              | 0.419645     |
| Thermal correction to Gibbs Free Energy=     | 0.337642     |
| Sum of electronic and zero-point Energies=   | -1319.847965 |
| Sum of electronic and thermal Energies=      | -1319.823014 |
| Sum of electronic and thermal Enthalpies=    | -1319.822070 |
| Sum of electronic and thermal Free Energies= | -1319.904073 |

| -----  |        |                        |              |              |  |
|--------|--------|------------------------|--------------|--------------|--|
| Center | Atomic | Forces (Hartrees/Bohr) |              |              |  |
| Number | Number | X                      | Y            | Z            |  |
| -----  |        |                        |              |              |  |
| 1      | 8      | -0.000000408           | -0.000000393 | -0.000000653 |  |
| 2      | 8      | -0.000000620           | 0.000001424  | -0.000000662 |  |
| 3      | 8      | 0.000000732            | 0.000000472  | -0.000000702 |  |
| 4      | 8      | 0.000000965            | 0.000001118  | -0.000001375 |  |
| 5      | 7      | 0.000000349            | 0.000000059  | -0.000000031 |  |
| 6      | 6      | 0.000000385            | -0.000001390 | 0.000001217  |  |
| 7      | 6      | 0.000000617            | -0.000001159 | 0.000000759  |  |
| 8      | 1      | 0.000001233            | -0.000001333 | 0.000000752  |  |
| 9      | 6      | 0.000000193            | -0.000000794 | 0.000000484  |  |
| 10     | 1      | 0.000000944            | -0.000000816 | 0.000000020  |  |
| 11     | 6      | 0.000000293            | -0.000000395 | 0.000000402  |  |
| 12     | 6      | -0.000000630           | -0.000000063 | 0.000000671  |  |
| 13     | 1      | -0.000000572           | -0.000000258 | 0.000000699  |  |
| 14     | 6      | -0.000000061           | -0.000000683 | 0.000001157  |  |
| 15     | 1      | -0.000000257           | -0.000001187 | 0.000001254  |  |
| 16     | 6      | 0.000000125            | 0.000000310  | -0.000000140 |  |
| 17     | 6      | 0.000000055            | 0.000000196  | -0.000000283 |  |
| 18     | 1      | 0.000001011            | -0.000000300 | 0.000000038  |  |
| 19     | 6      | 0.000000177            | 0.000000569  | -0.000000773 |  |

|    |   |              |              |              |
|----|---|--------------|--------------|--------------|
| 20 | 6 | -0.000000236 | 0.000000635  | -0.000000698 |
| 21 | 6 | -0.000000179 | 0.000000908  | -0.000000887 |
| 22 | 1 | 0.000000290  | 0.000001157  | -0.000001239 |
| 23 | 1 | -0.000000433 | 0.000001061  | -0.000000767 |
| 24 | 6 | -0.000000798 | 0.000001425  | -0.000001179 |
| 25 | 1 | -0.000000905 | 0.000001608  | -0.000001077 |
| 26 | 6 | -0.000000170 | 0.000001546  | -0.000001465 |
| 27 | 1 | -0.000000180 | 0.000001911  | -0.000001726 |
| 28 | 6 | -0.000000019 | 0.000001338  | -0.000001177 |
| 29 | 1 | 0.000000323  | 0.000001331  | -0.000001381 |
| 30 | 6 | -0.000000476 | 0.000000059  | 0.000000064  |
| 31 | 6 | -0.000000920 | 0.000000191  | 0.000000249  |
| 32 | 1 | -0.000001219 | 0.000000437  | 0.000000254  |
| 33 | 6 | -0.000001443 | 0.000000303  | 0.000000409  |
| 34 | 1 | -0.000001857 | 0.000000144  | 0.000000654  |
| 35 | 6 | -0.000001183 | -0.000000033 | 0.000000560  |
| 36 | 1 | -0.000001606 | -0.000000108 | 0.000000798  |
| 37 | 6 | -0.000000930 | -0.000000028 | 0.000000322  |
| 38 | 1 | -0.000000551 | -0.000000282 | 0.000000509  |
| 39 | 6 | -0.000000239 | -0.000000364 | 0.000000335  |
| 40 | 1 | 0.000000173  | -0.000000057 | 0.000000062  |
| 41 | 6 | 0.000001168  | 0.000000801  | -0.000001027 |
| 42 | 6 | 0.000001850  | 0.000000152  | -0.000000832 |
| 43 | 1 | 0.000001961  | -0.000000099 | -0.000000756 |
| 44 | 1 | 0.000002057  | 0.000000267  | -0.000001211 |
| 45 | 1 | 0.000001700  | 0.000000470  | -0.000001191 |
| 46 | 8 | 0.000000353  | -0.000001805 | 0.000001525  |
| 47 | 6 | -0.000000801 | -0.000001923 | 0.000001839  |
| 48 | 1 | 0.000000248  | -0.000002338 | 0.000002127  |
| 49 | 1 | -0.000000362 | -0.000002191 | 0.000002183  |
| 50 | 1 | -0.000000145 | -0.000001892 | 0.000001890  |

-----  
Compound **4a**

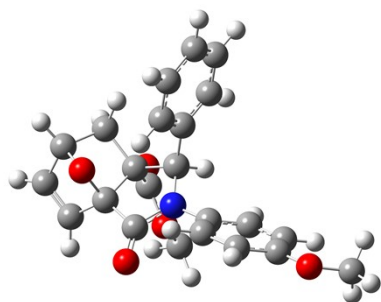

|                                              |                             |
|----------------------------------------------|-----------------------------|
| Zero-point correction=                       | 0.396783 (Hartree/Particle) |
| Thermal correction to Energy=                | 0.421422                    |
| Thermal correction to Enthalpy=              | 0.422366                    |
| Thermal correction to Gibbs Free Energy=     | 0.340712                    |
| Sum of electronic and zero-point Energies=   | -1319.881924                |
| Sum of electronic and thermal Energies=      | -1319.857285                |
| Sum of electronic and thermal Enthalpies=    | -1319.856340                |
| Sum of electronic and thermal Free Energies= | -1319.937994                |

-----

| Center<br>Number | Atomic<br>Number | Forces (Hartrees/Bohr) |              |              |
|------------------|------------------|------------------------|--------------|--------------|
|                  |                  | X                      | Y            | Z            |
| 1                | 8                | -0.000001339           | 0.000000134  | -0.000000305 |
| 2                | 8                | 0.000000491            | 0.000000272  | -0.000000739 |
| 3                | 8                | 0.000000745            | -0.000000987 | 0.000000412  |
| 4                | 8                | -0.000001667           | -0.000000361 | -0.000000306 |
| 5                | 7                | -0.000004486           | 0.000008101  | 0.000006427  |
| 6                | 6                | 0.000006875            | -0.000005837 | 0.000026978  |
| 7                | 6                | 0.000002934            | 0.000006098  | -0.000009721 |
| 8                | 1                | 0.000003427            | -0.000000190 | 0.000008287  |
| 9                | 6                | 0.000004217            | 0.000004274  | -0.000000012 |

-----

|    |   |              |              |              |
|----|---|--------------|--------------|--------------|
| 10 | 1 | 0.000001877  | 0.000000292  | -0.000000026 |
| 11 | 6 | 0.000003878  | -0.000005572 | -0.000002992 |
| 12 | 6 | -0.000002543 | -0.000000457 | -0.000008476 |
| 13 | 1 | -0.000004054 | -0.000004543 | 0.000010719  |
| 14 | 6 | -0.000005887 | -0.000003000 | -0.000004049 |
| 15 | 1 | 0.000005760  | 0.000002443  | 0.000009719  |
| 16 | 6 | 0.000001152  | 0.000000764  | -0.000001039 |
| 17 | 6 | -0.000000005 | -0.000003790 | -0.000005140 |
| 18 | 1 | 0.000003965  | 0.000002794  | 0.000002865  |
| 19 | 6 | 0.000000969  | -0.000000718 | -0.000000885 |
| 20 | 6 | -0.000001228 | 0.000000131  | -0.000001695 |
| 21 | 6 | 0.000000426  | -0.000004856 | 0.000001300  |
| 22 | 1 | 0.000000345  | 0.000000653  | -0.000005348 |
| 23 | 1 | -0.000002647 | 0.000003046  | -0.000000011 |
| 24 | 6 | -0.000001487 | -0.000002136 | -0.000003143 |
| 25 | 1 | 0.000001011  | 0.000002536  | -0.000001066 |
| 26 | 6 | 0.000002030  | 0.000000656  | -0.000002924 |
| 27 | 1 | -0.000002255 | -0.000000832 | -0.000001750 |
| 28 | 6 | 0.000000438  | -0.000002544 | -0.000002992 |
| 29 | 1 | -0.000001033 | 0.000001535  | -0.000000359 |
| 30 | 6 | -0.000000640 | -0.000000002 | 0.000000236  |
| 31 | 6 | 0.000001986  | -0.000000910 | -0.000000115 |
| 32 | 1 | -0.000000832 | 0.000001546  | -0.000001539 |
| 33 | 6 | 0.000001063  | 0.000001415  | 0.000001668  |
| 34 | 1 | 0.000000786  | 0.000000426  | -0.000003376 |
| 35 | 6 | -0.000000788 | 0.000001863  | 0.000000777  |
| 36 | 1 | 0.000001674  | -0.000001248 | -0.000001674 |
| 37 | 6 | -0.000001883 | 0.000001365  | -0.000002720 |
| 38 | 1 | 0.000001533  | -0.000001755 | 0.000001229  |
| 39 | 6 | 0.000000818  | 0.000000040  | -0.000003645 |
| 40 | 1 | -0.000000379 | 0.000000126  | 0.000003246  |

|    |   |              |              |              |
|----|---|--------------|--------------|--------------|
| 41 | 6 | -0.000001083 | 0.000003287  | -0.000002664 |
| 42 | 6 | -0.000001835 | -0.000001995 | 0.000000541  |
| 43 | 1 | -0.000002537 | -0.000003968 | -0.000000022 |
| 44 | 1 | -0.000002304 | -0.000000173 | -0.000000215 |
| 45 | 1 | 0.000000102  | -0.000002165 | 0.000000055  |
| 46 | 8 | -0.000000547 | 0.000007709  | -0.000020402 |
| 47 | 6 | -0.000003015 | -0.000002346 | 0.000003654  |
| 48 | 1 | -0.000000596 | -0.000000263 | 0.000002417  |
| 49 | 1 | 0.000000656  | -0.000000039 | 0.000003862  |
| 50 | 1 | -0.000004086 | -0.000000817 | 0.000004956  |

-----

**TS'**

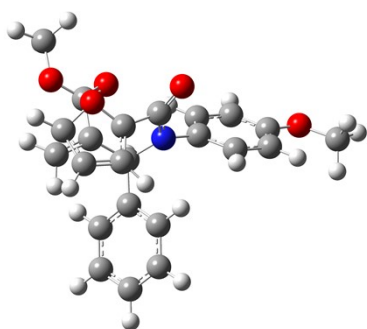

|                                              |                             |
|----------------------------------------------|-----------------------------|
| Zero-point correction=                       | 0.393784 (Hartree/Particle) |
| Thermal correction to Energy=                | 0.418528                    |
| Thermal correction to Enthalpy=              | 0.419473                    |
| Thermal correction to Gibbs Free Energy=     | 0.338792                    |
| Sum of electronic and zero-point Energies=   | -1319.823256                |
| Sum of electronic and thermal Energies=      | -1319.798512                |
| Sum of electronic and thermal Enthalpies=    | -1319.797568                |
| Sum of electronic and thermal Free Energies= | -1319.878248                |

-----

| Center<br>Number | Atomic<br>Number | Forces (Hartrees/Bohr) |   |   |
|------------------|------------------|------------------------|---|---|
|                  |                  | X                      | Y | Z |

---

|    |   |              |              |              |
|----|---|--------------|--------------|--------------|
| 1  | 6 | -0.000000170 | -0.000000381 | 0.000000300  |
| 2  | 8 | 0.000000429  | 0.000001035  | 0.000001022  |
| 3  | 8 | 0.000000595  | 0.000001677  | 0.000000841  |
| 4  | 6 | 0.000000329  | 0.000001532  | 0.000000451  |
| 5  | 7 | -0.000000271 | 0.000000084  | 0.000000077  |
| 6  | 6 | -0.000000175 | -0.000000074 | 0.000000155  |
| 7  | 6 | 0.000000345  | 0.000001864  | -0.000000547 |
| 8  | 6 | 0.000000339  | 0.000001275  | 0.000000321  |
| 9  | 6 | 0.000000259  | 0.000000263  | 0.000000316  |
| 10 | 6 | -0.000000260 | 0.000000658  | -0.000000349 |
| 11 | 6 | 0.000000145  | 0.000001704  | 0.000000094  |
| 12 | 6 | 0.000000026  | 0.000002039  | -0.000000604 |
| 13 | 6 | 0.000000164  | -0.000000906 | 0.000001144  |
| 14 | 6 | 0.000000433  | -0.000001584 | 0.000001116  |
| 15 | 6 | 0.000000329  | -0.000001114 | 0.000000936  |
| 16 | 6 | 0.000000151  | -0.000000487 | 0.000000448  |
| 17 | 6 | 0.000000974  | 0.000000427  | 0.000000763  |
| 18 | 8 | 0.000000054  | -0.000001615 | 0.000000966  |
| 19 | 6 | -0.000000176 | -0.000001425 | 0.000000859  |
| 20 | 6 | -0.000000389 | -0.000000400 | -0.000001075 |
| 21 | 6 | -0.000000621 | -0.000000471 | -0.000001378 |
| 22 | 6 | -0.000001290 | -0.000000665 | -0.000002422 |
| 23 | 6 | -0.000001206 | -0.000000391 | -0.000002703 |
| 24 | 6 | -0.000001013 | 0.000000144  | -0.000002417 |
| 25 | 6 | -0.000000616 | 0.000000190  | -0.000001263 |
| 26 | 6 | 0.000000823  | -0.000000203 | 0.000001061  |
| 27 | 8 | 0.000000635  | -0.000001057 | 0.000000947  |
| 28 | 8 | 0.000000535  | 0.000000241  | 0.000001124  |
| 29 | 6 | 0.000000812  | -0.000000158 | 0.000001927  |
| 30 | 1 | -0.000000253 | -0.000000676 | -0.000000013 |

|    |   |              |              |              |
|----|---|--------------|--------------|--------------|
| 31 | 1 | -0.000000112 | 0.000001890  | -0.000001043 |
| 32 | 1 | -0.000000029 | 0.000000391  | -0.000000162 |
| 33 | 1 | -0.000000292 | 0.000000731  | -0.000000961 |
| 34 | 1 | 0.000000417  | 0.000002077  | 0.000000158  |
| 35 | 1 | -0.000000132 | 0.000002363  | -0.000001258 |
| 36 | 1 | 0.000000224  | -0.000001193 | 0.000001227  |
| 37 | 1 | 0.000000305  | -0.000002063 | 0.000001475  |
| 38 | 1 | 0.000000120  | -0.000000112 | 0.000000373  |
| 39 | 1 | 0.000000128  | 0.000000522  | -0.000000093 |
| 40 | 1 | 0.000000204  | -0.000001936 | 0.000001063  |
| 41 | 1 | 0.000000453  | -0.000001011 | 0.000001036  |
| 42 | 1 | -0.000000076 | -0.000001393 | 0.000000142  |
| 43 | 1 | -0.000000684 | -0.000001126 | -0.000001197 |
| 44 | 1 | -0.000001309 | -0.000001123 | -0.000002590 |
| 45 | 1 | -0.000001517 | -0.000000234 | -0.000003269 |
| 46 | 1 | -0.000001060 | 0.000000583  | -0.000002591 |
| 47 | 1 | -0.000000409 | 0.000000556  | -0.000001007 |
| 48 | 1 | 0.000000811  | 0.000000222  | 0.000002032  |
| 49 | 1 | 0.000001142  | 0.000000068  | 0.000002428  |
| 50 | 1 | 0.000000880  | -0.000000736 | 0.000002141  |

-----

Compound **4a'**

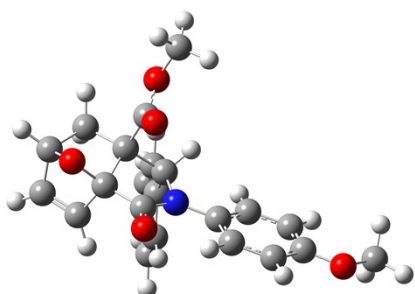

Zero-point correction=

0.396979 (Hartree/Particle)

|                                              |              |
|----------------------------------------------|--------------|
| Thermal correction to Energy=                | 0.421304     |
| Thermal correction to Enthalpy=              | 0.422248     |
| Thermal correction to Gibbs Free Energy=     | 0.342369     |
| Sum of electronic and zero-point Energies=   | -1319.851482 |
| Sum of electronic and thermal Energies=      | -1319.827157 |
| Sum of electronic and thermal Enthalpies=    | -1319.826213 |
| Sum of electronic and thermal Free Energies= | -1319.906092 |

| -----  |        |                        |              |              |
|--------|--------|------------------------|--------------|--------------|
| Center | Atomic | Forces (Hartrees/Bohr) |              |              |
| Number | Number | X                      | Y            | Z            |
| -----  |        |                        |              |              |
| 1      | 6      | 0.000001788            | -0.000000618 | 0.000001449  |
| 2      | 8      | 0.000000541            | -0.000000856 | -0.000000133 |
| 3      | 8      | 0.000000908            | 0.000000101  | 0.000003458  |
| 4      | 6      | 0.000001897            | -0.000002452 | 0.000001485  |
| 5      | 7      | 0.000001573            | -0.000001557 | 0.000000708  |
| 6      | 6      | -0.000001610           | -0.000002495 | 0.000001642  |
| 7      | 6      | -0.000004229           | 0.000000072  | -0.000005640 |
| 8      | 6      | -0.000000712           | -0.000000051 | -0.000001233 |
| 9      | 6      | -0.000002186           | 0.000000518  | -0.000002828 |
| 10     | 6      | 0.000000391            | 0.000004445  | -0.000002826 |
| 11     | 6      | 0.000001326            | 0.000000497  | -0.000002707 |
| 12     | 6      | 0.000000870            | 0.000001427  | -0.000002131 |
| 13     | 6      | 0.000000246            | -0.000000147 | 0.000002102  |
| 14     | 6      | 0.000000136            | -0.000004458 | 0.000004122  |
| 15     | 6      | -0.000000203           | -0.000002421 | 0.000003031  |
| 16     | 6      | -0.000000225           | -0.000004144 | 0.000002871  |
| 17     | 6      | 0.000001674            | -0.000000742 | 0.000001275  |
| 18     | 8      | 0.000000615            | -0.000002975 | 0.000004091  |
| 19     | 6      | -0.000000015           | -0.000001211 | 0.000005309  |

|    |   |              |              |              |
|----|---|--------------|--------------|--------------|
| 20 | 6 | 0.000002418  | 0.000000075  | 0.000000158  |
| 21 | 6 | -0.000001508 | 0.000001568  | -0.000002617 |
| 22 | 6 | 0.000001745  | 0.000001348  | -0.000002905 |
| 23 | 6 | 0.000002390  | 0.000001461  | -0.000003093 |
| 24 | 6 | 0.000003752  | 0.000000160  | -0.000002370 |
| 25 | 6 | 0.000001996  | -0.000000720 | -0.000000555 |
| 26 | 6 | 0.000002302  | 0.000002911  | 0.000002599  |
| 27 | 8 | -0.000004121 | -0.000000061 | -0.000001422 |
| 28 | 8 | -0.000002619 | 0.000001919  | -0.000001476 |
| 29 | 6 | -0.000004000 | 0.000002369  | 0.000000898  |
| 30 | 1 | -0.000001190 | 0.000003580  | -0.000001121 |
| 31 | 1 | 0.000002377  | -0.000000699 | -0.000001484 |
| 32 | 1 | -0.000000877 | 0.000003278  | -0.000001784 |
| 33 | 1 | -0.000001215 | 0.000001043  | -0.000003317 |
| 34 | 1 | -0.000000388 | 0.000002449  | -0.000002381 |
| 35 | 1 | 0.000002699  | 0.000000309  | -0.000003915 |
| 36 | 1 | 0.000000730  | -0.000003434 | 0.000002497  |
| 37 | 1 | 0.000000155  | -0.000003721 | 0.000004084  |
| 38 | 1 | -0.000001426 | -0.000003060 | 0.000002203  |
| 39 | 1 | -0.000001994 | 0.000002851  | -0.000001177 |
| 40 | 1 | -0.000000587 | -0.000003244 | 0.000004968  |
| 41 | 1 | -0.000000227 | -0.000003379 | 0.000003703  |
| 42 | 1 | -0.000001007 | -0.000001142 | 0.000003365  |
| 43 | 1 | -0.000000354 | 0.000002014  | -0.000001914 |
| 44 | 1 | 0.000000719  | 0.000002244  | -0.000003786 |
| 45 | 1 | 0.000002401  | 0.000000058  | -0.000003970 |
| 46 | 1 | 0.000003013  | -0.000001031 | -0.000002874 |
| 47 | 1 | 0.000004289  | 0.000000219  | -0.000000274 |
| 48 | 1 | -0.000003940 | 0.000003057  | 0.000000727  |
| 49 | 1 | -0.000004037 | 0.000002329  | 0.000001038  |
| 50 | 1 | -0.000004281 | 0.000002318  | 0.000002151  |

-----

## VIII. References

- [1] Zhou Y, Zhang S, He H, *et al.* Design and synthesis of highly selective pyruvate dehydrogenase complex E1 inhibitors as bactericides. *Bioorganic & medicinal chemistry*, 2018, 26(1): 84-95.
- [2] Goulding E, Ward L C, Allan F E, *et al.* Development of the Esterase PestE for Amide Bond Synthesis Under Aqueous Conditions: Enzyme Cascades for Converting Waste PET into Tamibarotene[J]. *Angewandte Chemie International Edition*, 2025, 64(2): e202414162.
- [3] Fu Z, Wang X, Tao S, *et al.* Manganese catalyzed direct amidation of esters with amines[J]. *The Journal of Organic Chemistry*, 2021, 86(3): 2339-2358.
- [4] Song G, Li Q, Nong D Z, *et al.* Ni-Catalyzed Photochemical C–N Coupling of Amides with (Hetero) aryl Chlorides[J]. *Chemistry–A European Journal*, 2023, 29(37): e202300458.
- [5] Hwang S, Choi S Y, Lee J H, *et al.* Identification of a potent and noncytotoxic inhibitor of melanin production[J]. *Bioorganic & medicinal chemistry*, 2010, 18(15): 5602-5609.
- [6] Shepelenko K E, Gnatiuk I G, Minyaev M E, *et al.* Synthesis of furo[2, 3-c]quinolinones via intramolecular C (3)–H arylation of furan core under Pd/NHC-catalysis[J]. *Mendeleev Communications*, 2024, 34(2): 198-200.
- [7] Sprague D J, Park S K, Gramberg S, *et al.* Target-based discovery of a broad-spectrum flukicide[J]. *Nature structural & molecular biology*, 2024, 31(9): 1386-1393.
- [8] Parmentier M, Palamini P, Gosselin B, *et al.* One-pot synthesis of substituted amides from nitriles under mild reaction conditions in aqueous surfactant TPGS-750-M[J]. *Catalysis today*, 2024, 442: 114915.
- [9] Rodríguez-Enríquez F, Vina D, Uriarte E, *et al.* 7-Amidocoumarins as multitarget agents against neurodegenerative diseases: Substitution pattern modulation[J]. *ChemMedChem*, 2021, 16(1): 179-186.
- [10] Su M, Buchwald S L. A Bulky Biaryl Phosphine Ligand Allows for Palladium-Catalyzed Amidation of Five-Membered Heterocycles as Electrophiles[J]. *Angewandte Chemie International Edition*, 2012, 51(19): 4710-4713.

- [11] Xie Z, Yu C A, Xie L, *et al.* Pyridine-mediated efficient synthesis of (benzo) thiazoles-containing amides via the acylation of 2-amino (benzo) thiazoles under ultrasonic irradiation[J]. *Journal of Molecular Structure*, 2024, 1309: 138200.
- [12] Liu C, Li Y, Sheng R, *et al.* Synthesis of N-methylpyridine-chlorofuranformamide analogs as novel OPG up-regulators and inhibitors of RANKL-induced osteoclastogenesis[J]. *Bioorganic Chemistry*, 2021, 116: 105361.
- [13] Gallardo-Macias R, Kumar P, Jaskowski M, *et al.* Optimization of N-benzyl-5-nitrofuranyl-2-carboxamide as an antitubercular agent[J]. *Bioorganic & medicinal chemistry letters*, 2019, 29(4): 601-606.
- [14] Gao J, Ma R, Poovan F, *et al.* Streamlining the synthesis of amides using Nickel-based nanocatalysts[J]. *Nature Communications*, 2023, 14(1): 5013.
- [15] Lu G, Yuan X, Wang J, *et al.* PVP– I Catalyzed Oxidation of N-substituted Benzylamines to Benzamides[J]. *ChemistrySelect*, 2024, 9(1): e202303532.
- [16] Qi S S, Sun X P, Sun Y B, *et al.* Synthesis of Chiral Diarylmethylamides via Catalytic Asymmetric Aza-Michael Addition of Amides to ortho-Quinomethanes[J]. *The Journal of Organic Chemistry*, 2024, 89(2): 928-938.
- [17] Ahmed H E A, Abdel-Salam H A, Shaker M A. Synthesis, characterization, molecular modeling, and potential antimicrobial and anticancer activities of novel 2-aminoisoindoline-1, 3-dione derivatives[J]. *Bioorganic Chemistry*, 2016, 66: 1-11.
- [18] Yamaji M, Tomonari K, Ikuma K, *et al.* Blue fluorescence from N, O-coordinated BF<sub>2</sub> complexes having aromatic chromophores in solution and the solid state[J]. *Photochemical & Photobiological Sciences*, 2019, 18(12): 2884-2892.
- [19] Borah P, Bora R M, Kyndiah L, *et al.* An adaptable and efficient approach for the formation of C–N bonds using copper Schiff-base graphitic carbon nitride as a reusable and heterogeneous catalyst[J]. *New Journal of Chemistry*, 2025, 49(23): 9954-9964.
- [20] Zheng Z, Chen Z, Zhou Y, *et al.* Synthesis and SAR study of novel diimide skeleton compounds with the anti-inflammatory activities in vitro and in vivo[J]. *Bioorganic & Medicinal Chemistry*, 2023, 90: 117353.

- [21] Qian H, Zhang T, Song L, *et al.* Di-and Tetranuclear Palladium (II) Complexes Containing C, N-Bidentate Furoylhydrazone for Suzuki–Miyaura Reactions[J]. *European Journal of Organic Chemistry*, 2017, 2017(10): 1337-1342.
- [22] Kanbayashi N, Takenaka K, Okamura T, *et al.* Asymmetric auto-tandem catalysis with a planar-chiral ruthenium complex: sequential allylic amidation and atom-transfer radical cyclization[J]. *Angewandte Chemie International Edition*, 2013, 52(18): 4897-4901.
- [23] M. J. Frisch, G. W. Trucks, H. B. Schlegel, G. E. Scuseria, M. A. Robb, J. R. Cheeseman, G. Scalmani, V. Barone, G. A. Petersson, H. Nakatsuji, X. Li, M. Caricato, A. V. Marenich, J. Bloino, B. G. Janesko, R. Gomperts, B. Mennucci, H. P. Hratchian, J. V. Ortiz, A. F. Izmaylov, J. L. Sonnenberg, Williams, F. Ding, F. Lipparini, F. Egidi, J. Goings, B. Peng, A. Petrone, T. Henderson, D. Ranasinghe, V. G. Zakrzewski, J. Gao, N. Rega, G. Zheng, W. Liang, M. Hada, M. Ehara, K. Toyota, R. Fukuda, J. Hasegawa, M. Ishida, T. Nakajima, Y. Honda, O. Kitao, H. Nakai, T. Vreven, K. Throssell, J. A. Montgomery Jr., J. E. Peralta, F. Ogliaro, M. J. Bearpark, J. J. Heyd, E. N. Brothers, K. N. Kudin, V. N. Staroverov, T. A. Keith, R. Kobayashi, J. Normand, K. Raghavachari, A. P. Rendell, J. C. Burant, S. S. Iyengar, J. Tomasi, M. Cossi, J. M. Millam, M. Klene, C. Adamo, R. Cammi, J. W. Ochterski, R. L. Martin, K. Morokuma, O. Farkas, J. B. Foresman, D. J. Fox, Wallingford, CT, 2016.

# IX. NMR Spectra

$^1\text{H}$  NMR (400 MHz) in  $\text{CDCl}_3$

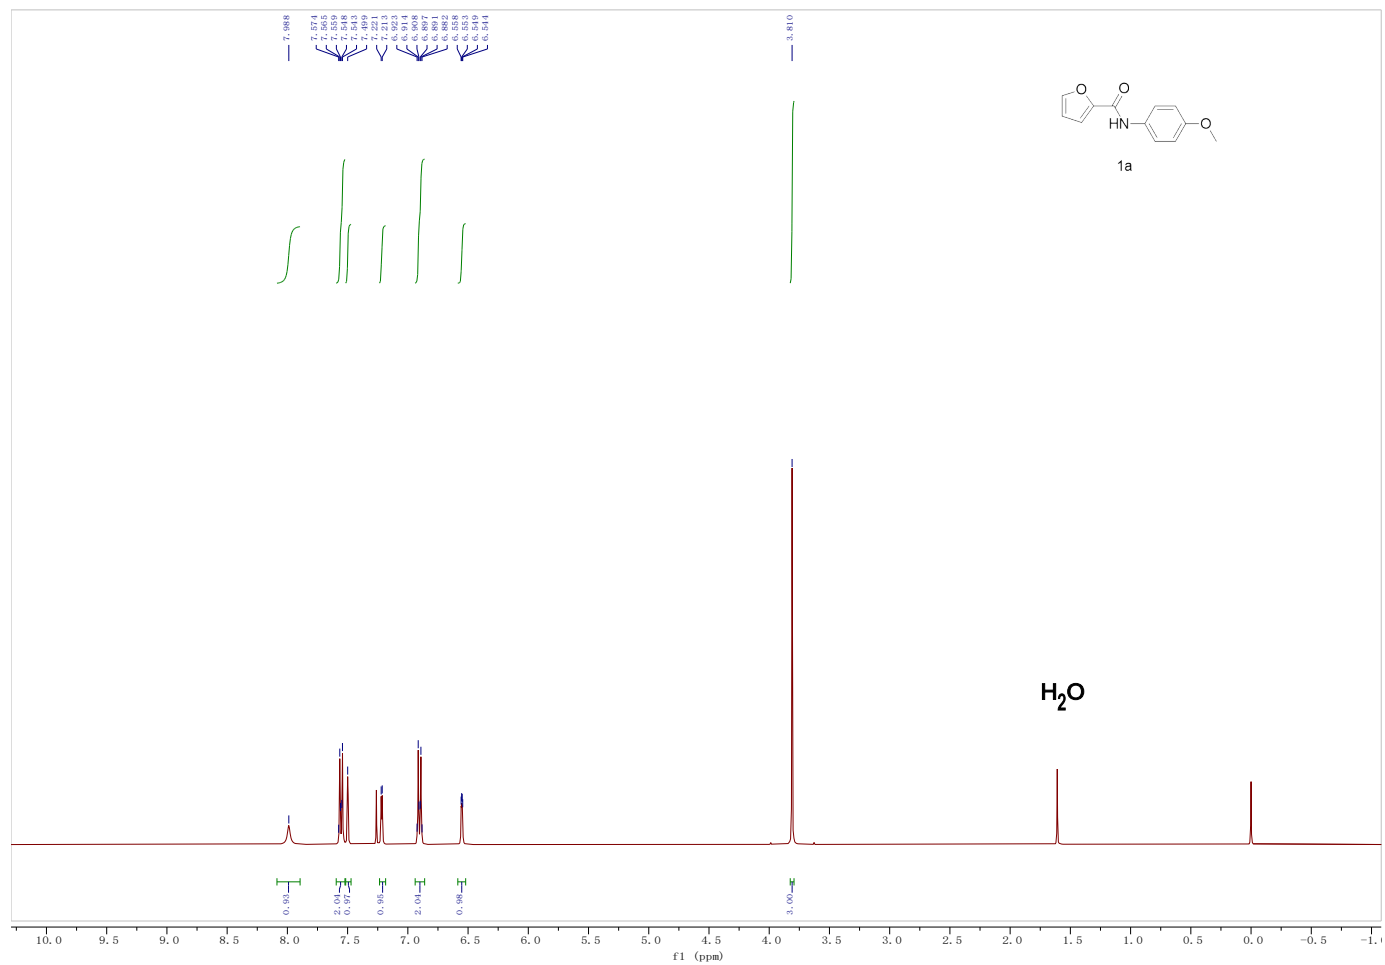

$^1\text{H}$  NMR (400 MHz) in  $\text{CDCl}_3$

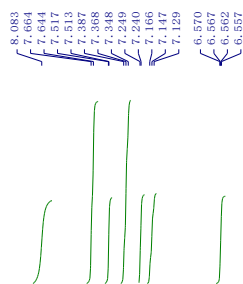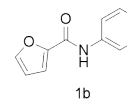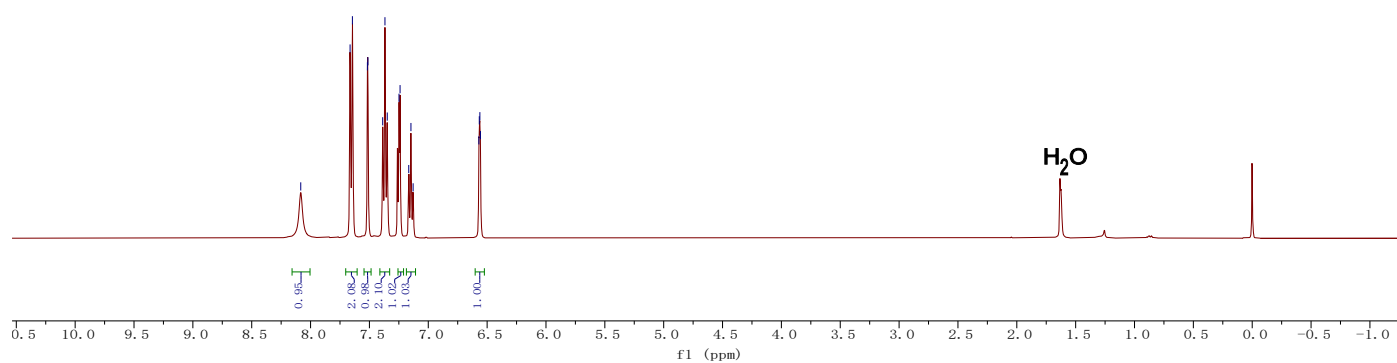

$^1\text{H}$  NMR (400 MHz) in  $\text{CDCl}_3$

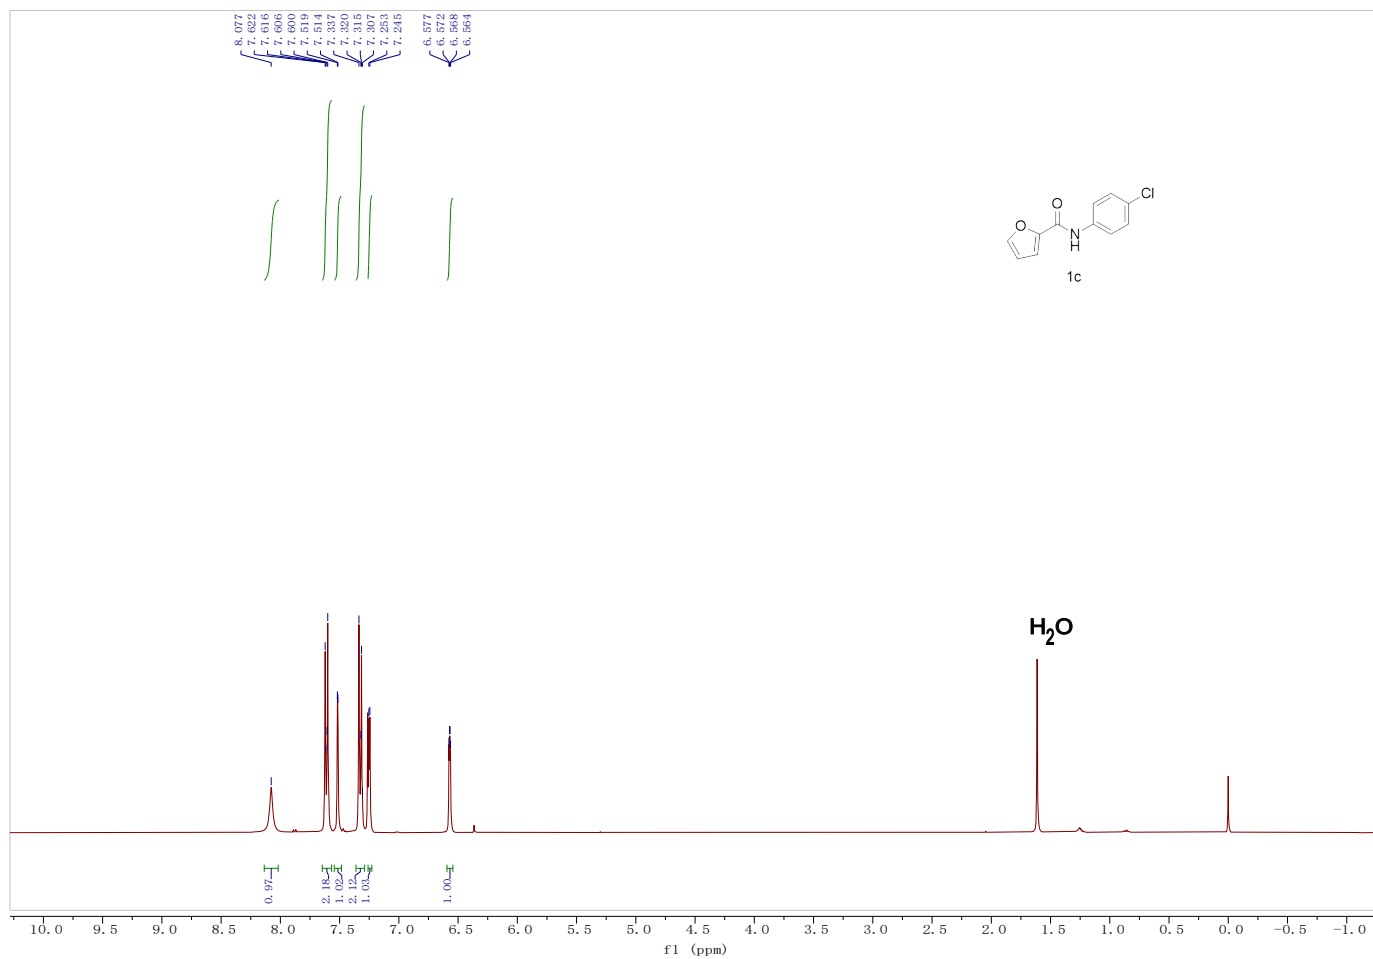

$^1\text{H}$  NMR (400 MHz) in  $\text{CDCl}_3$

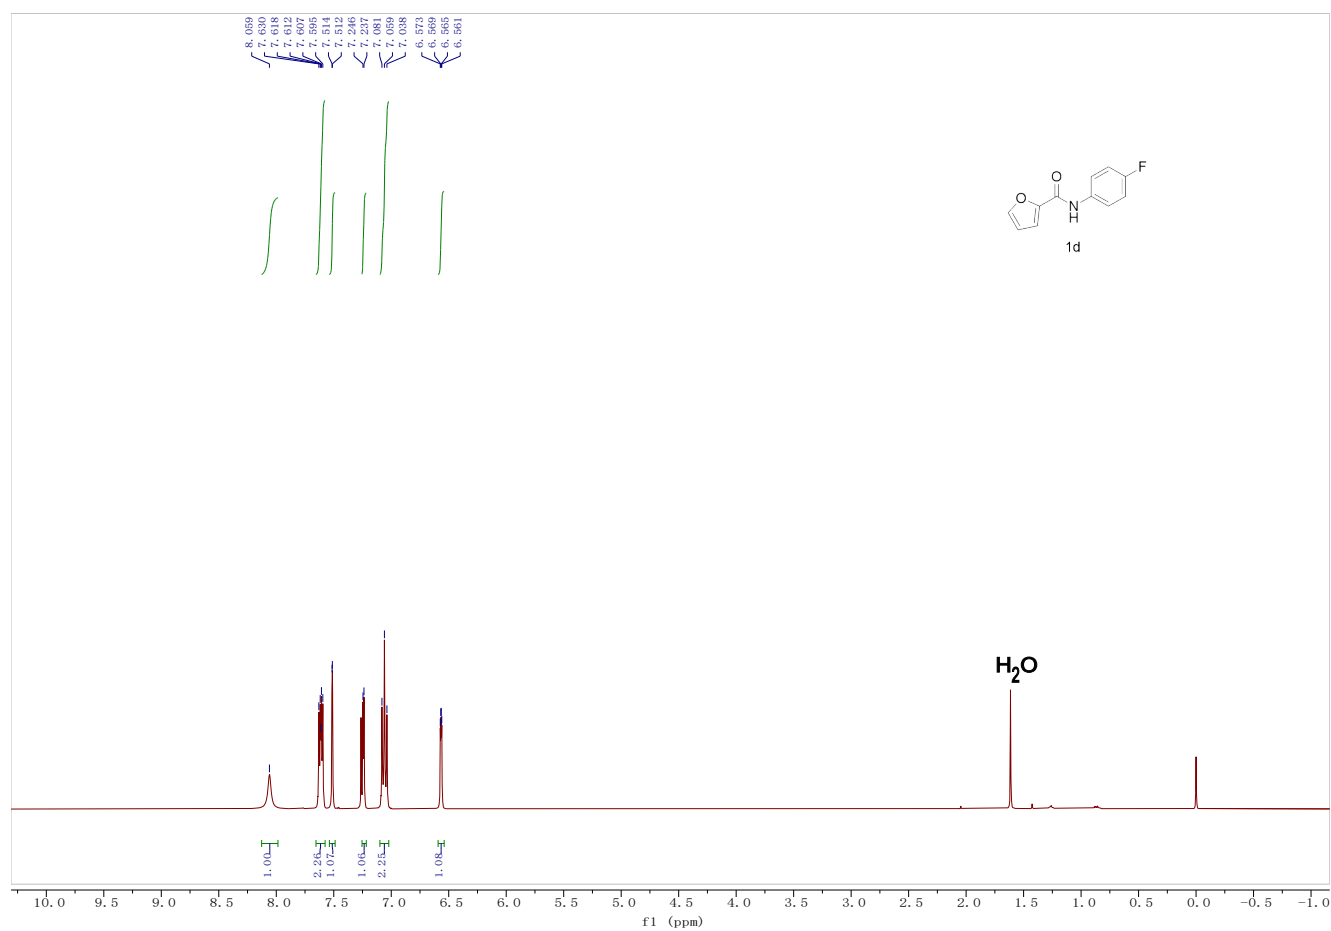

$^1\text{H}$  NMR (400 MHz) in  $\text{CDCl}_3$

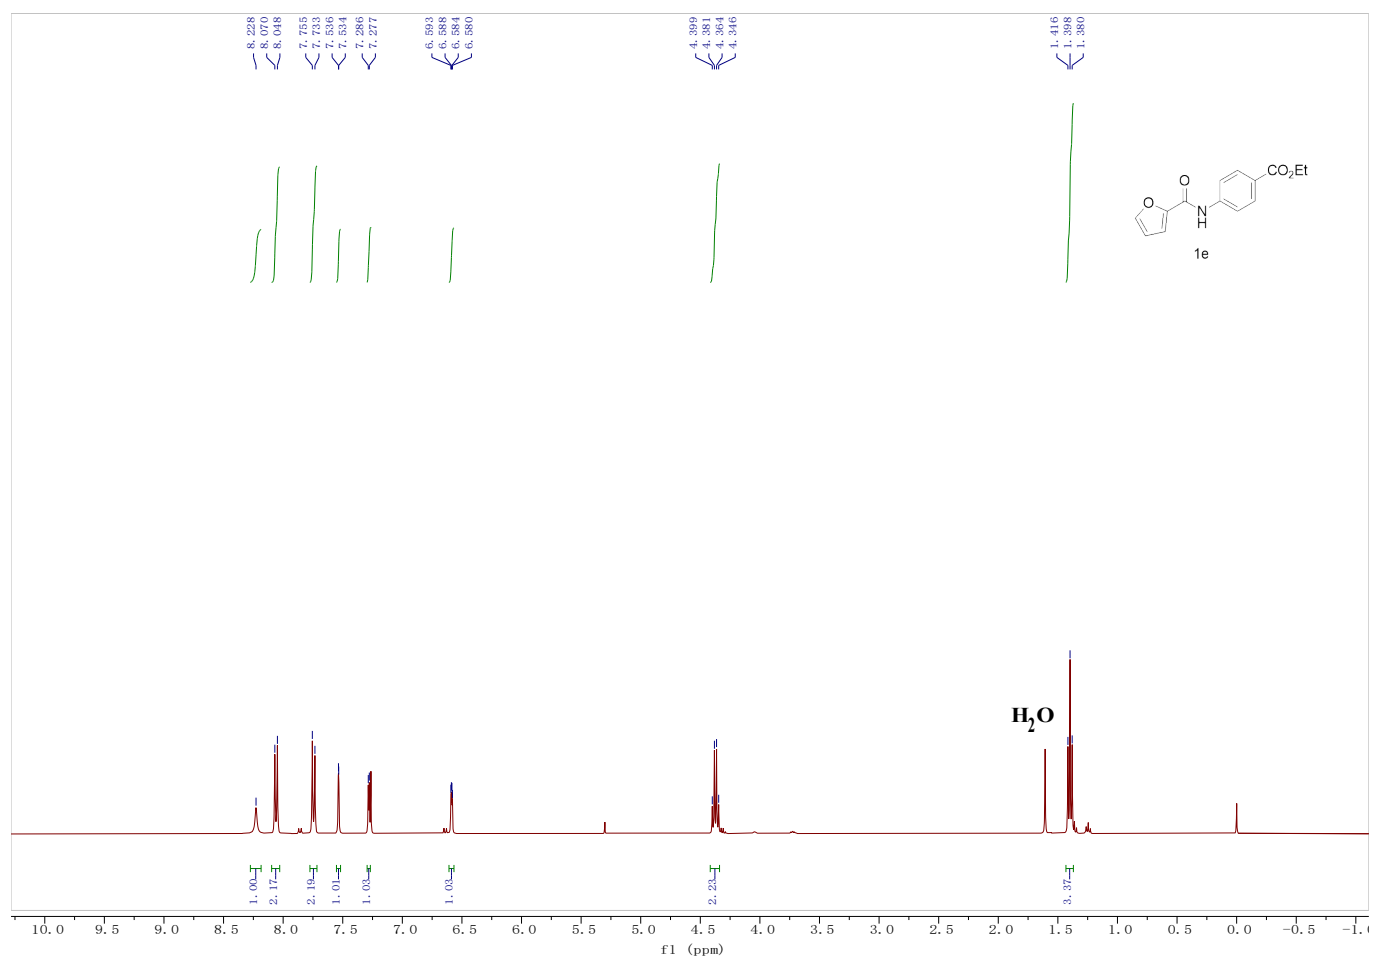

$^1\text{H}$  NMR (400 MHz) in  $\text{CDCl}_3$

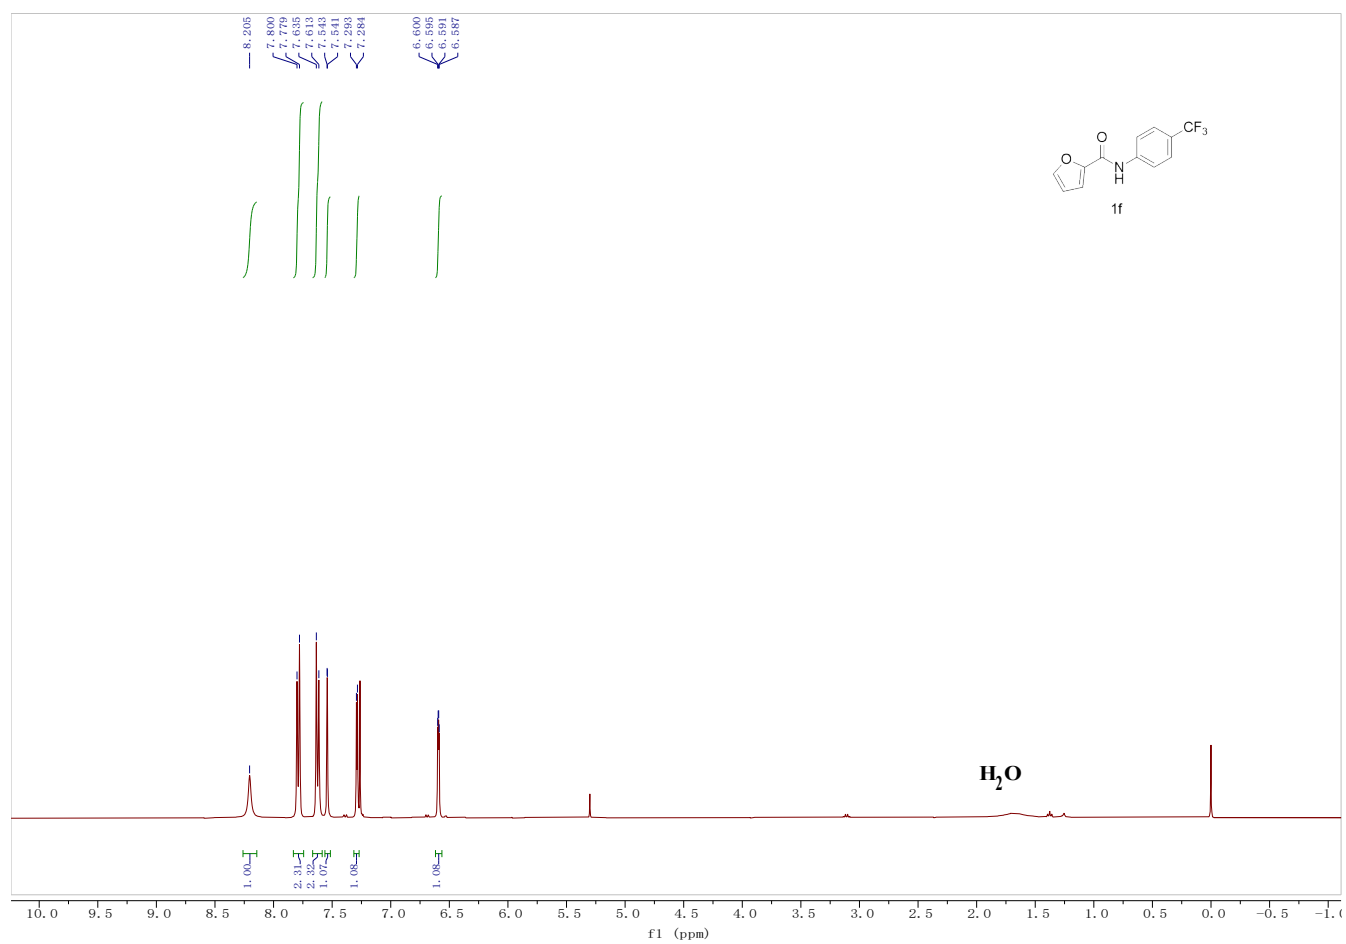

# $^1\text{H}$ NMR (400 MHz) in $\text{DMSO-}d_6$

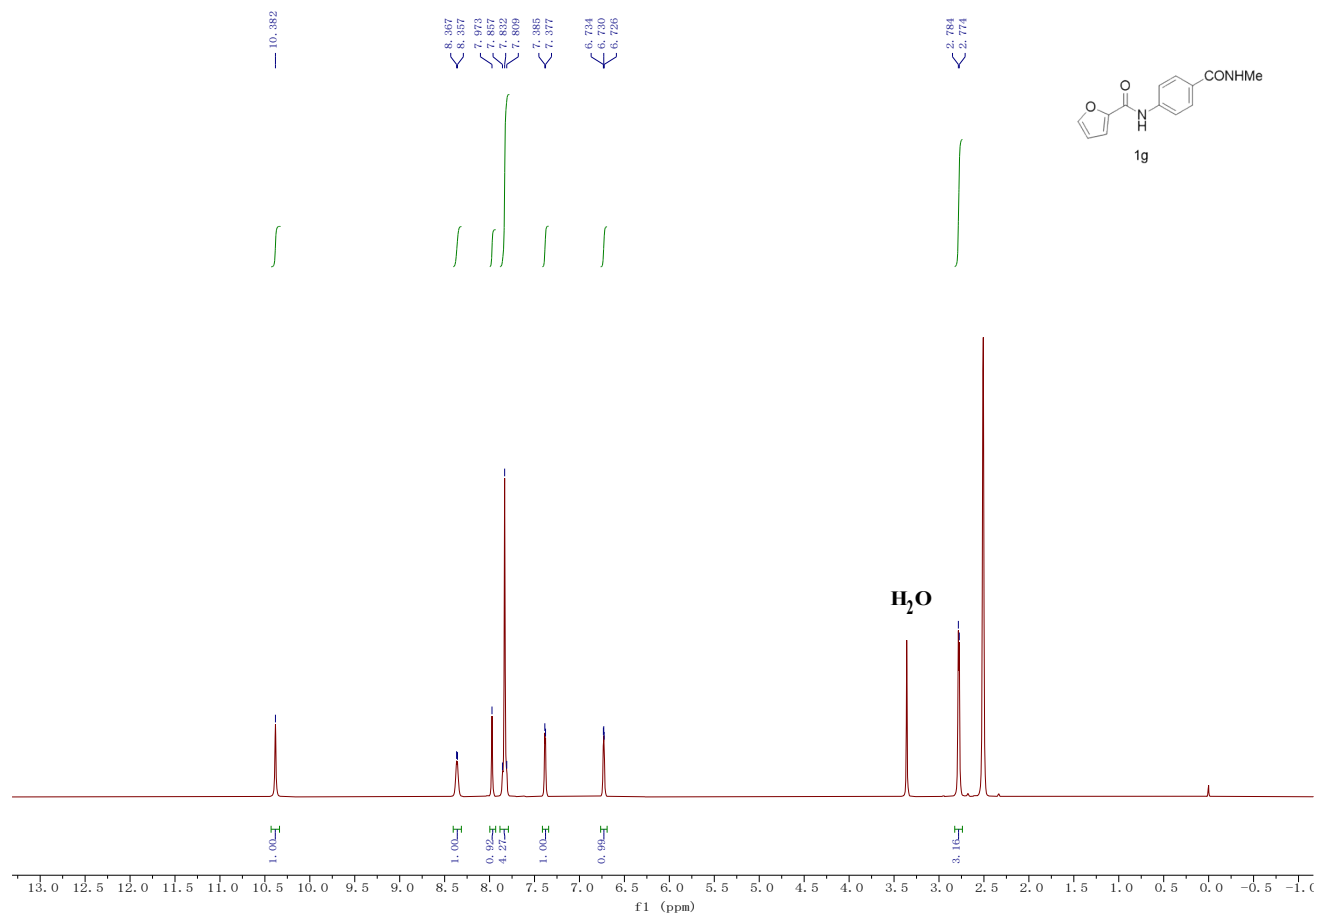

# $^{13}\text{C}$ NMR (101 MHz) in $\text{DMSO-}d_6$

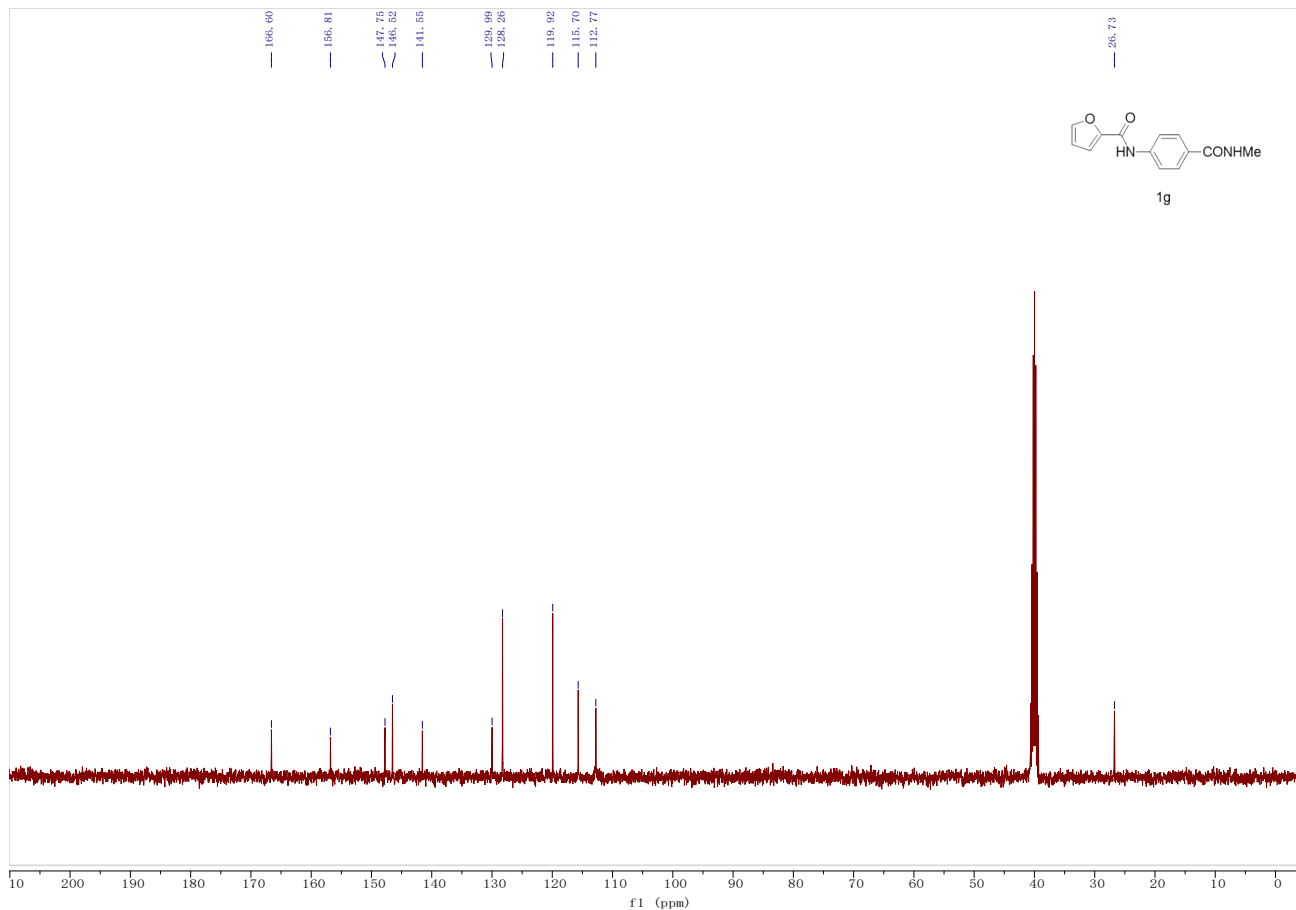

$^1\text{H}$  NMR (400 MHz) in  $\text{CDCl}_3$

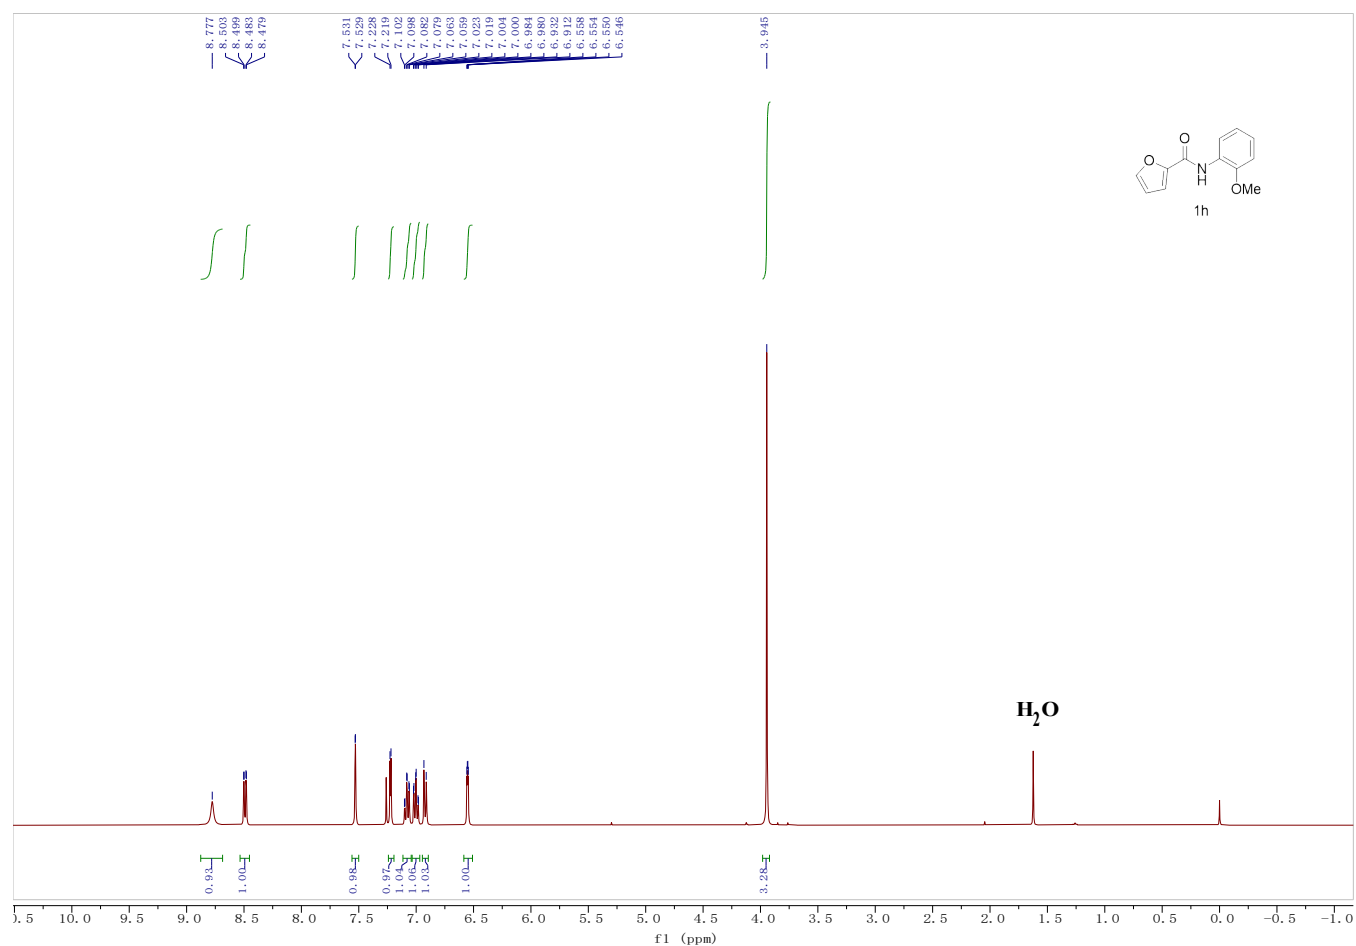

$^1\text{H}$  NMR (400 MHz) in  $\text{CDCl}_3$

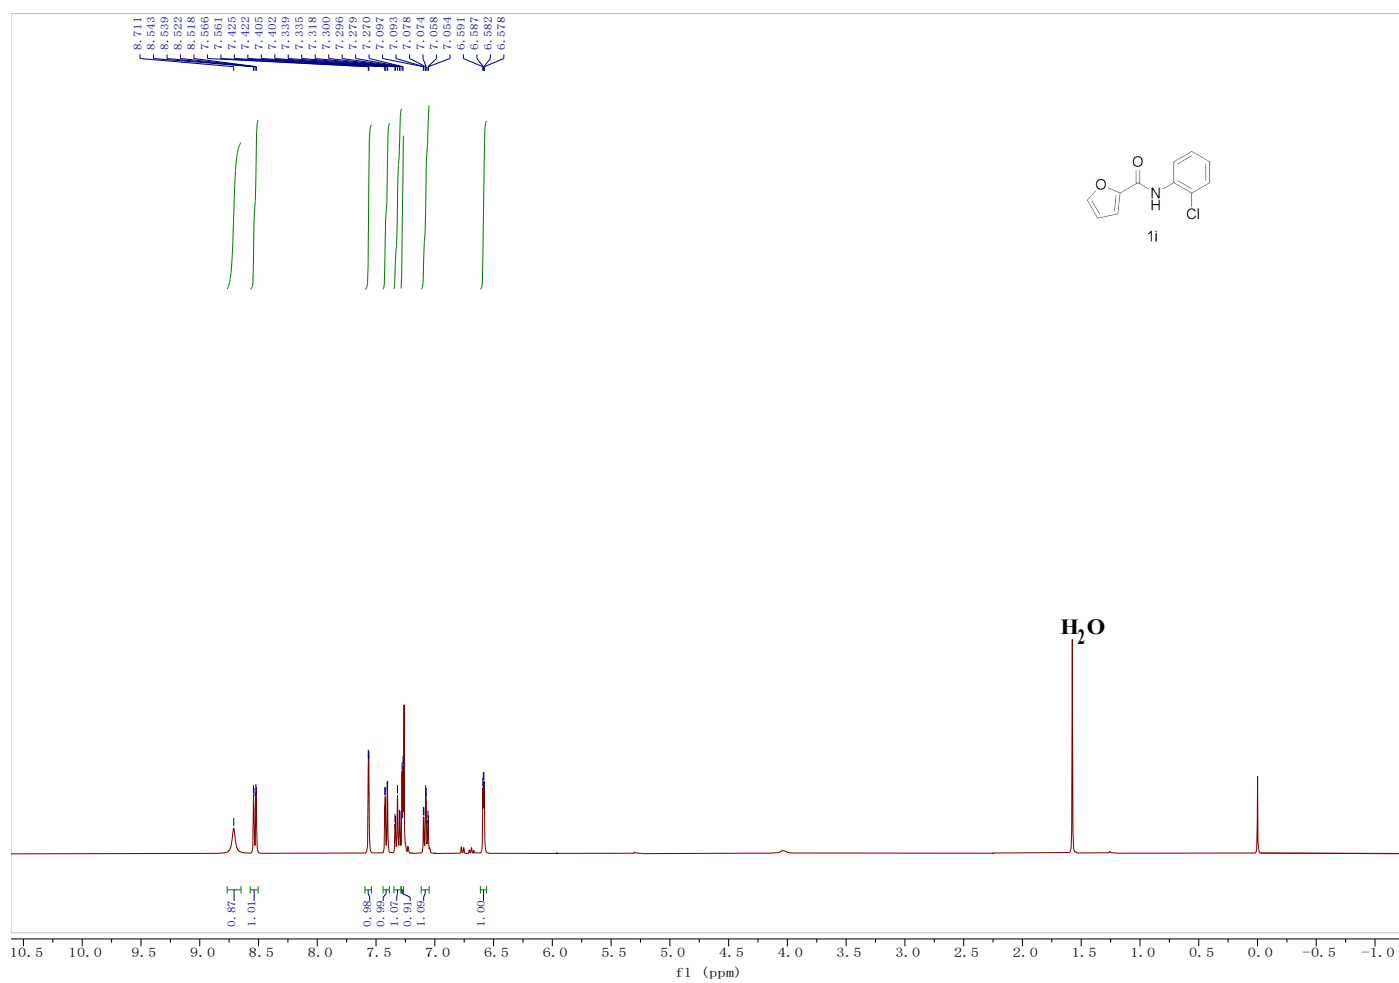

$^1\text{H}$  NMR (400 MHz) in  $\text{CDCl}_3$

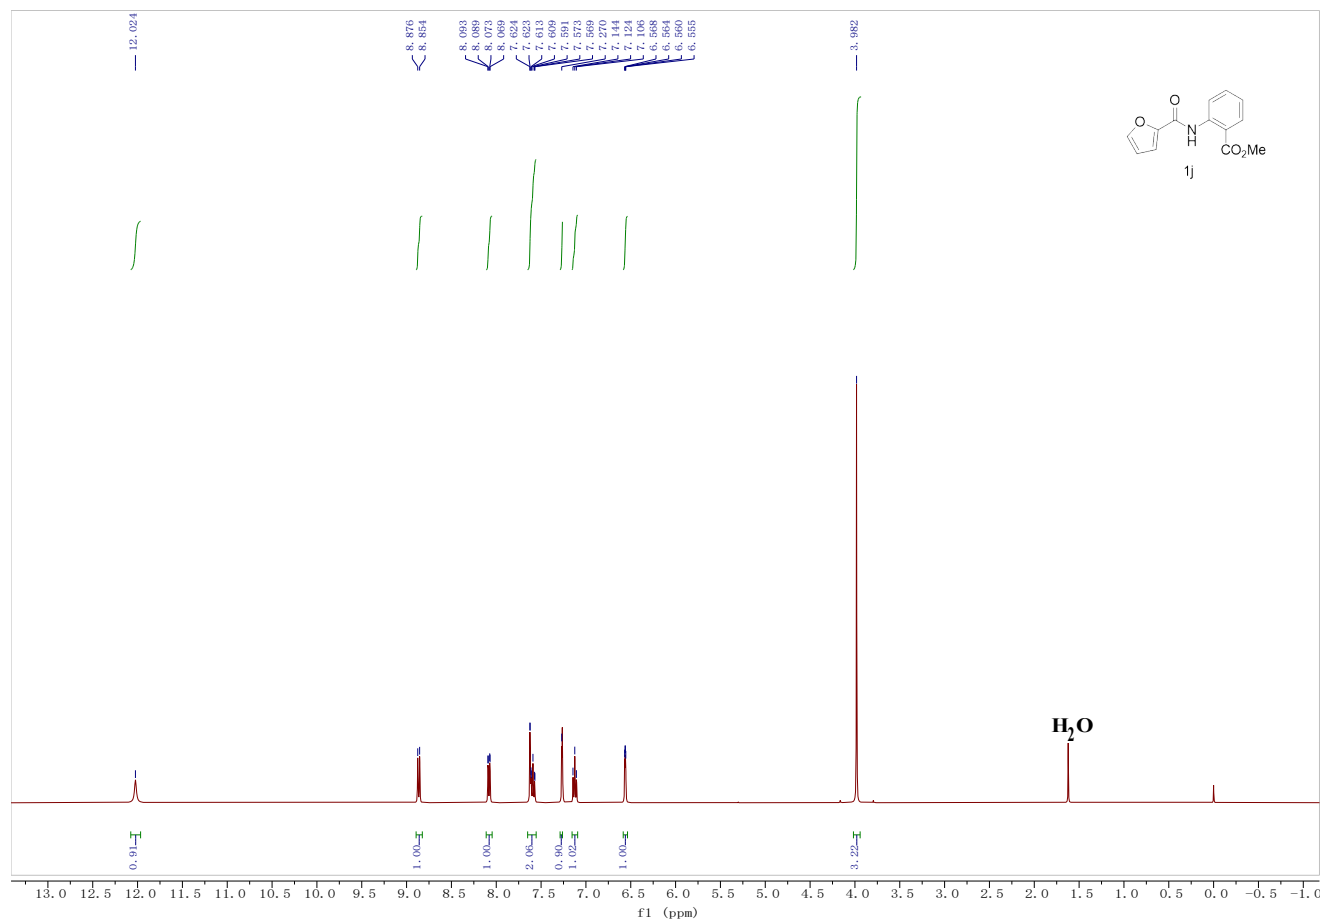

$^1\text{H}$  NMR (400 MHz) in  $\text{CDCl}_3$

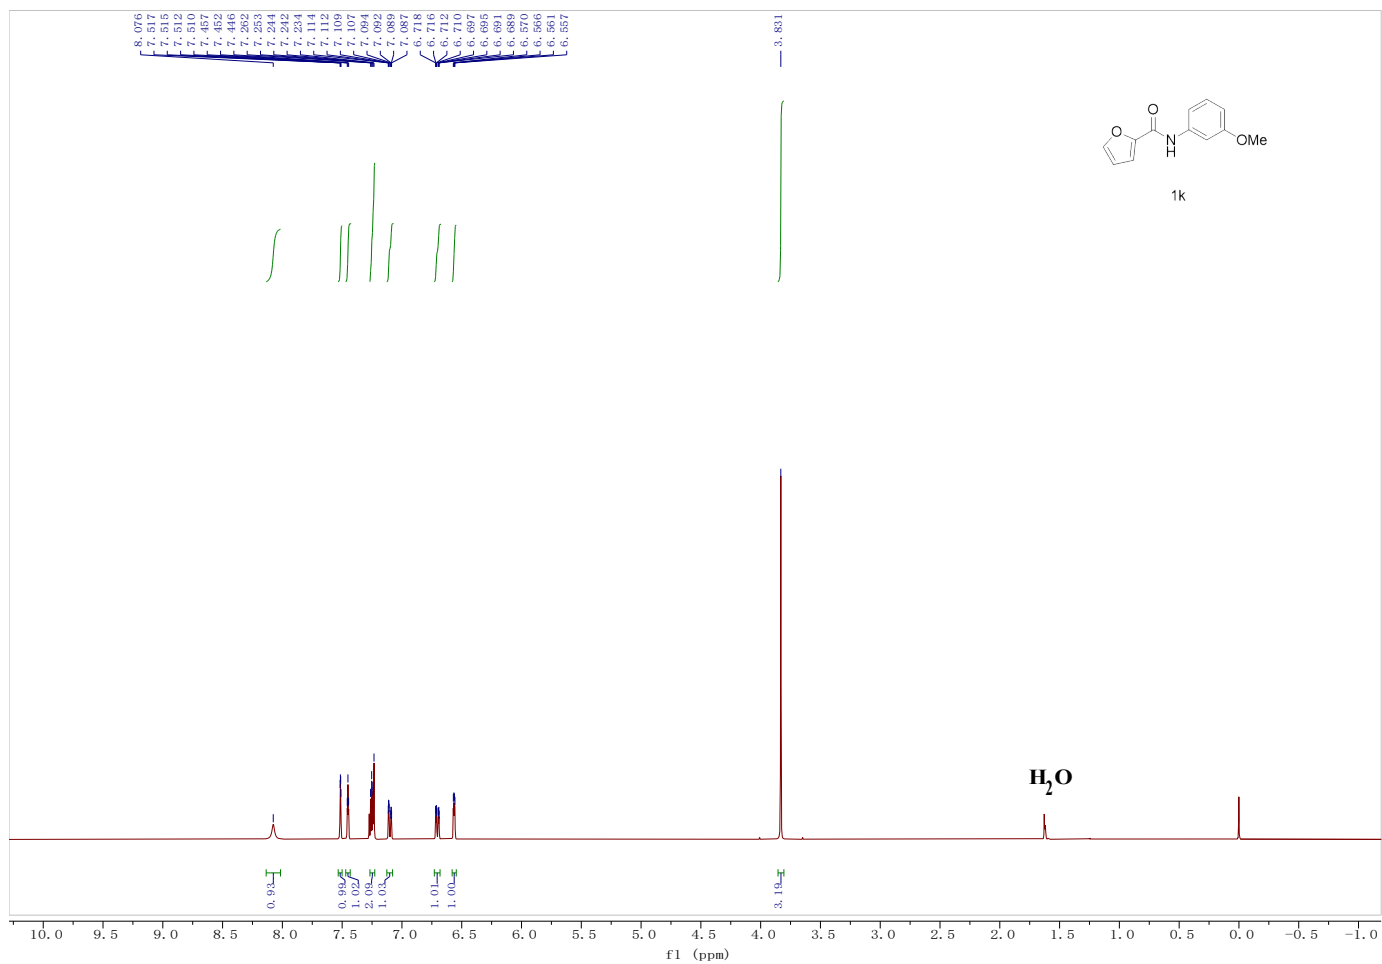

$^1\text{H}$  NMR (400 MHz) in  $\text{DMSO-}d_6$

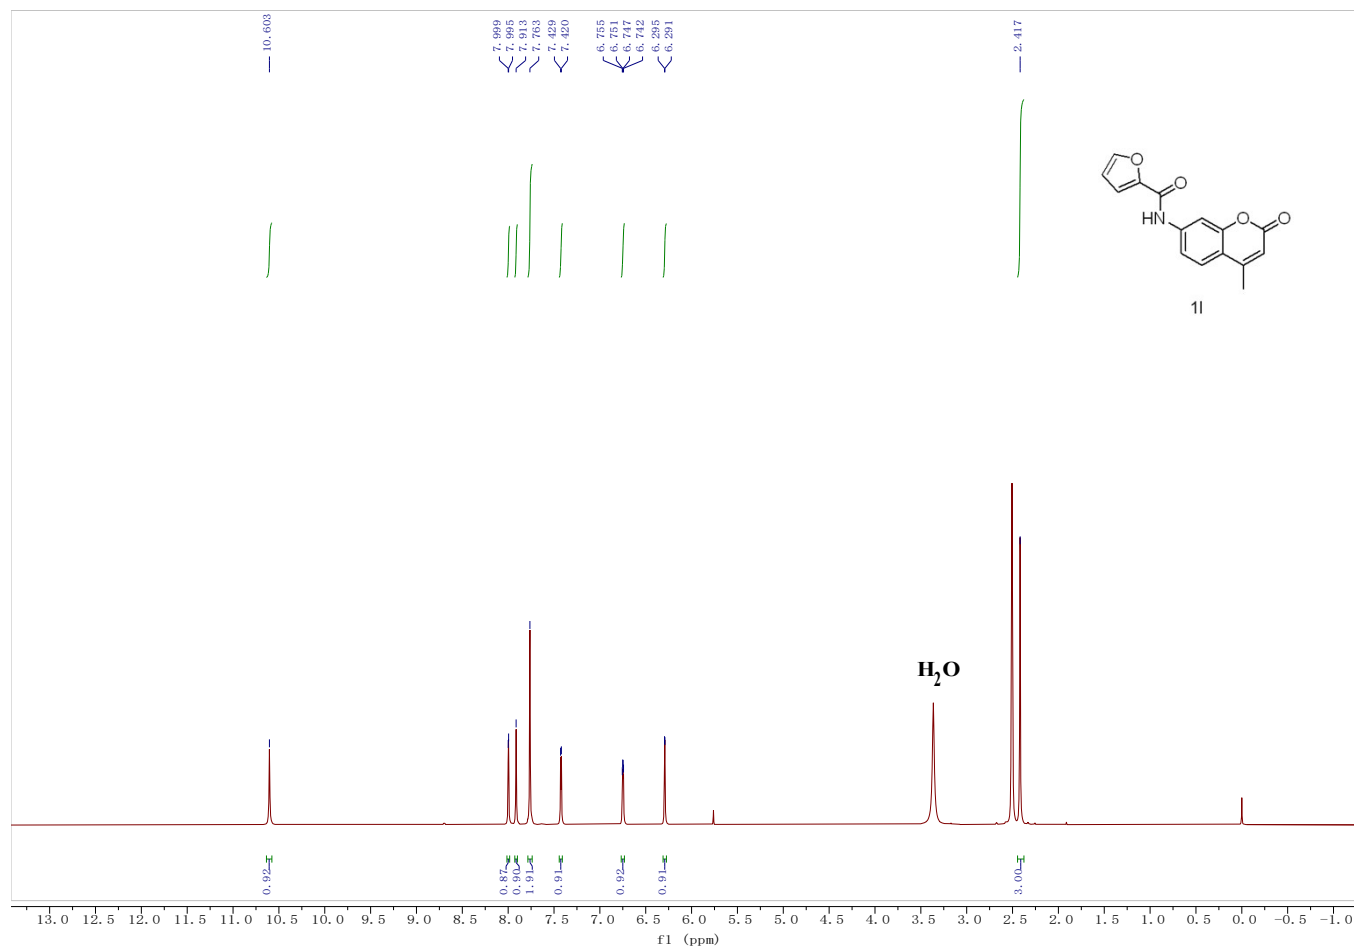

$^1\text{H}$  NMR (400 MHz) in  $\text{DMSO-}d_6$

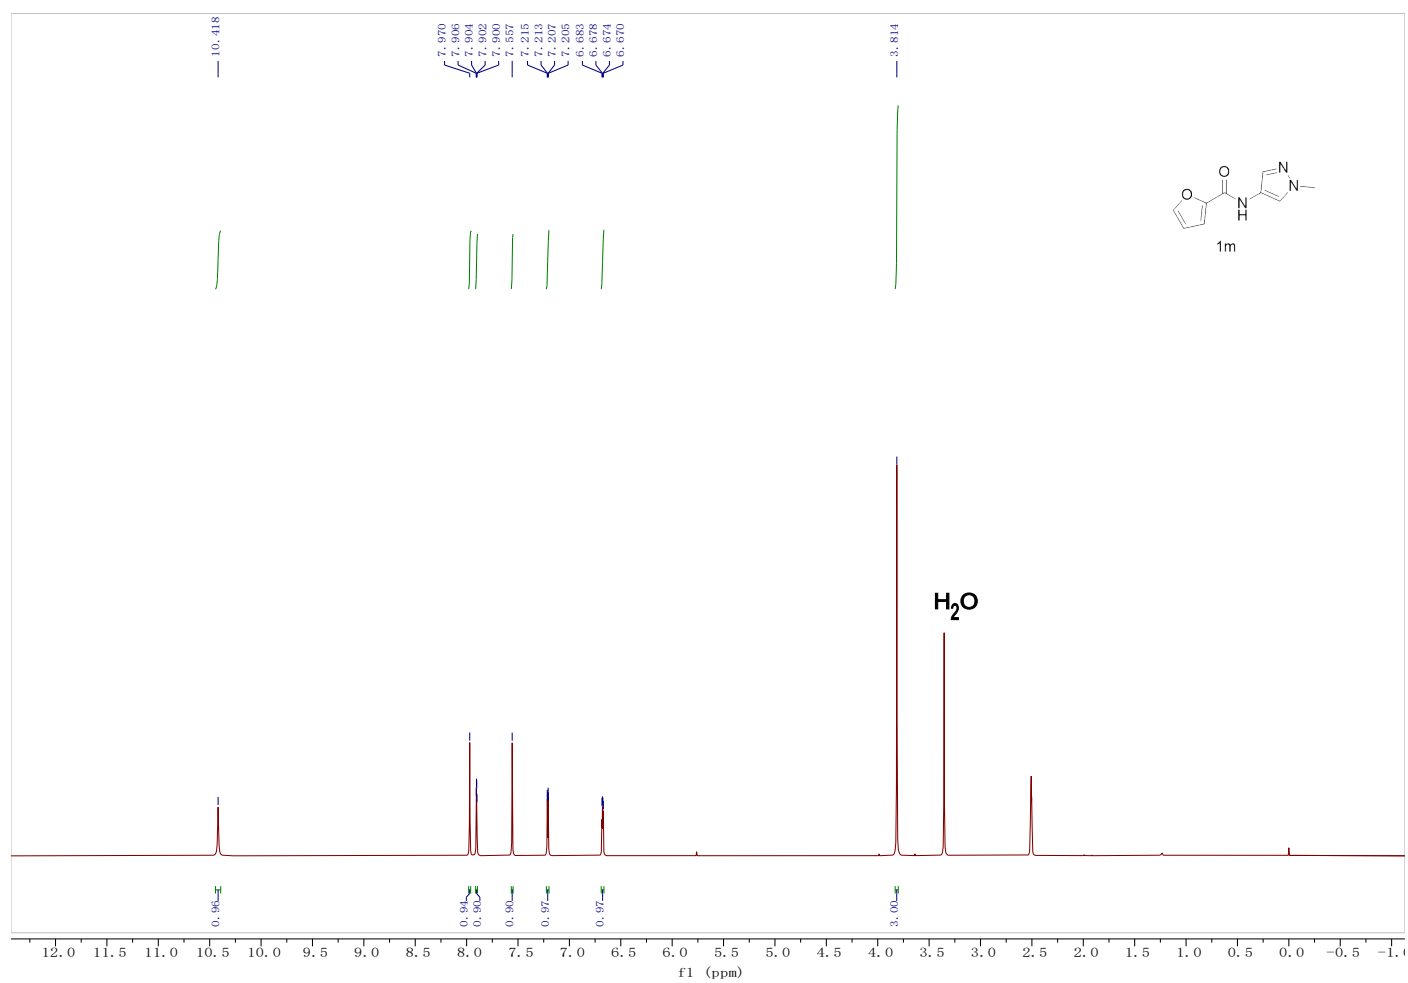

$^1\text{H}$  NMR (400 MHz) in  $\text{CDCl}_3$

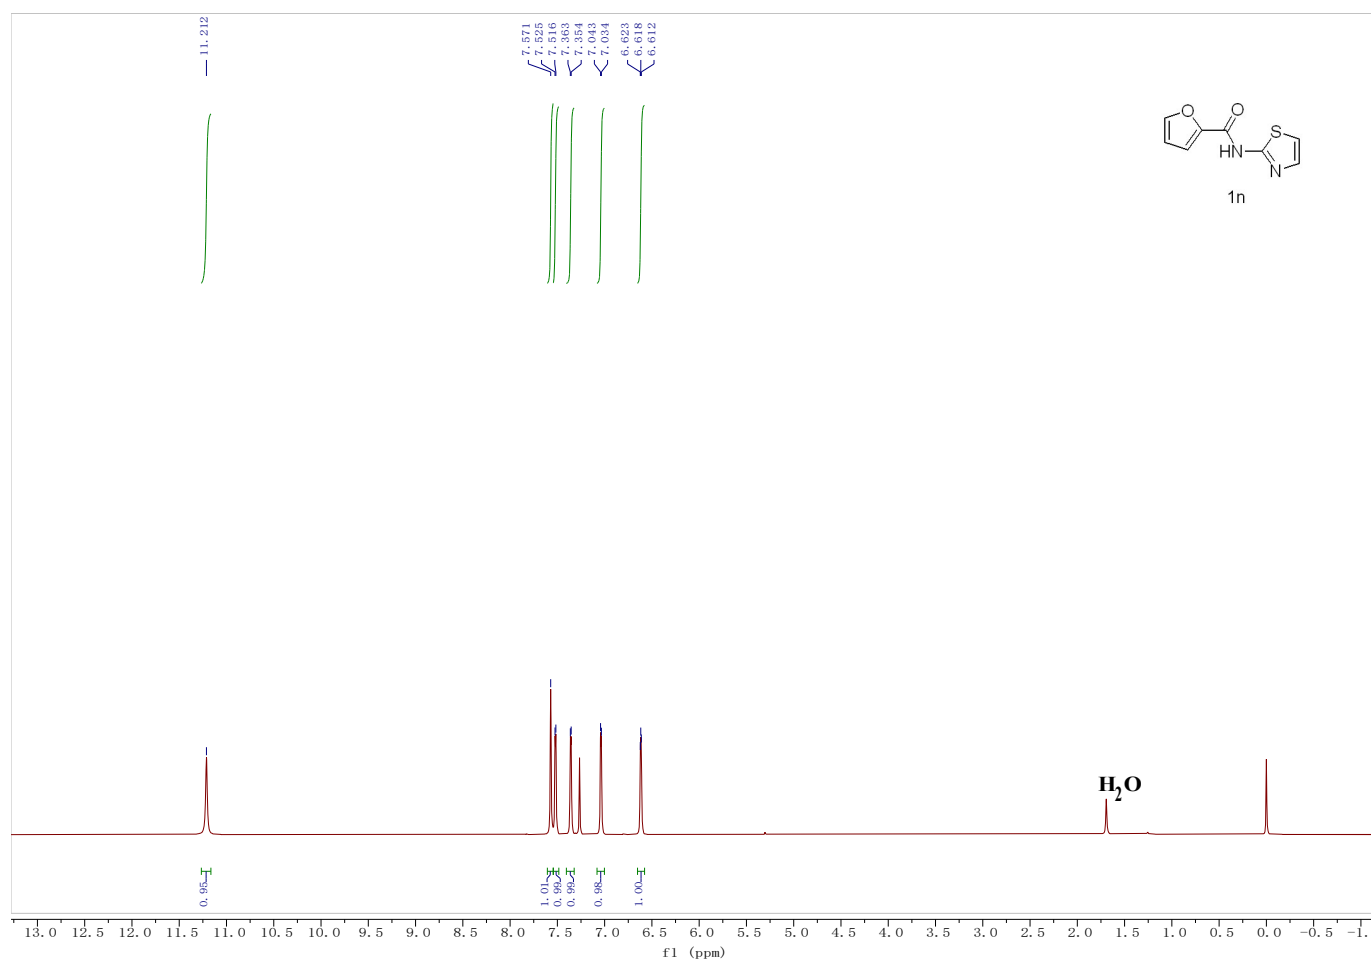

$^1\text{H}$  NMR (400 MHz) in  $\text{CDCl}_3$

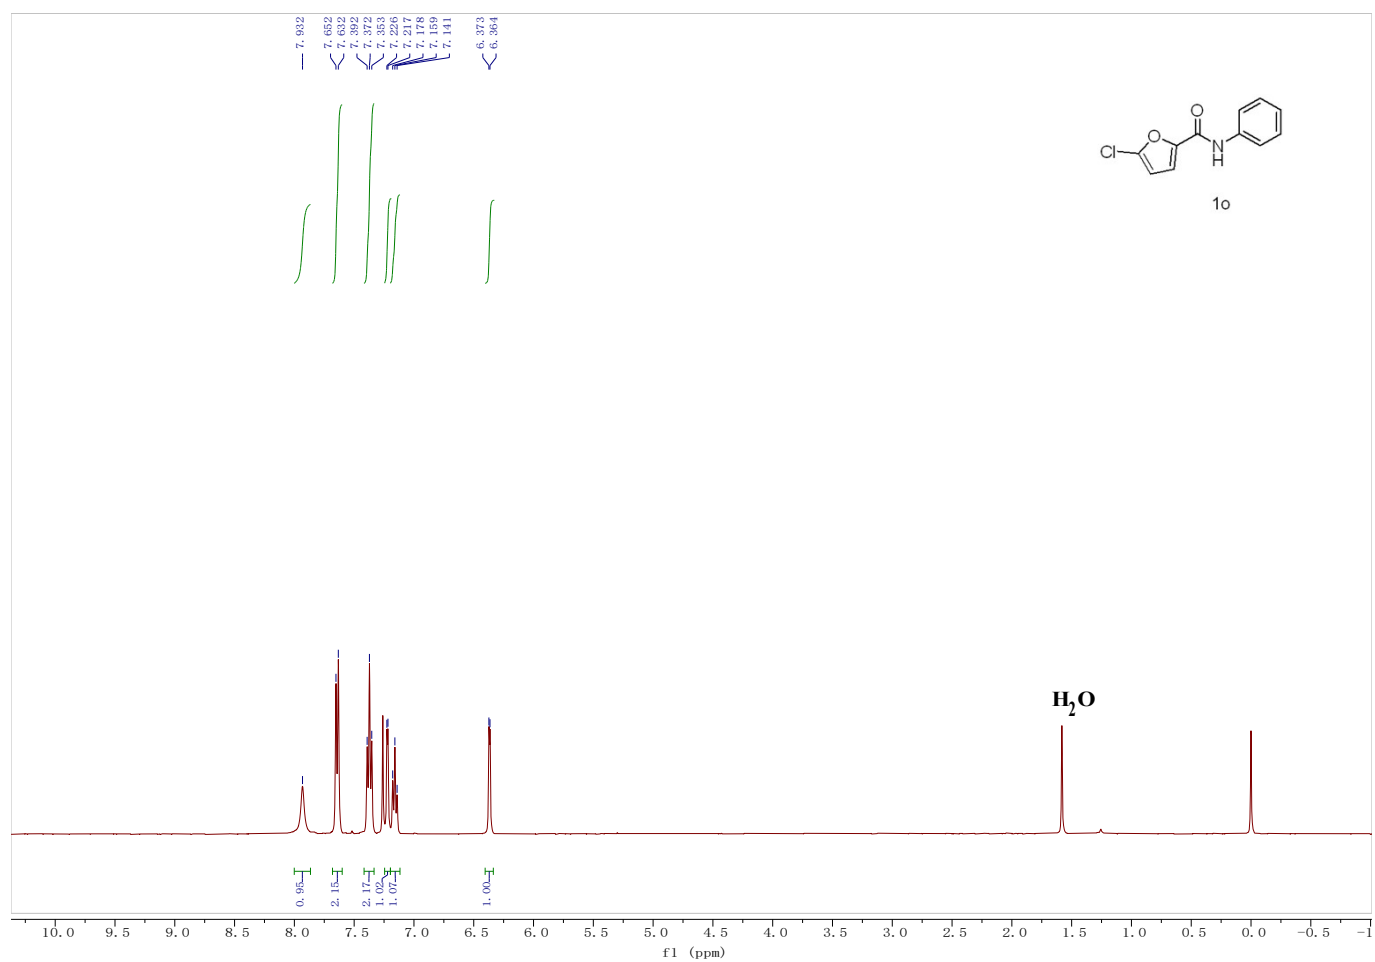

$^1\text{H}$  NMR (400 MHz) in  $\text{CDCl}_3$

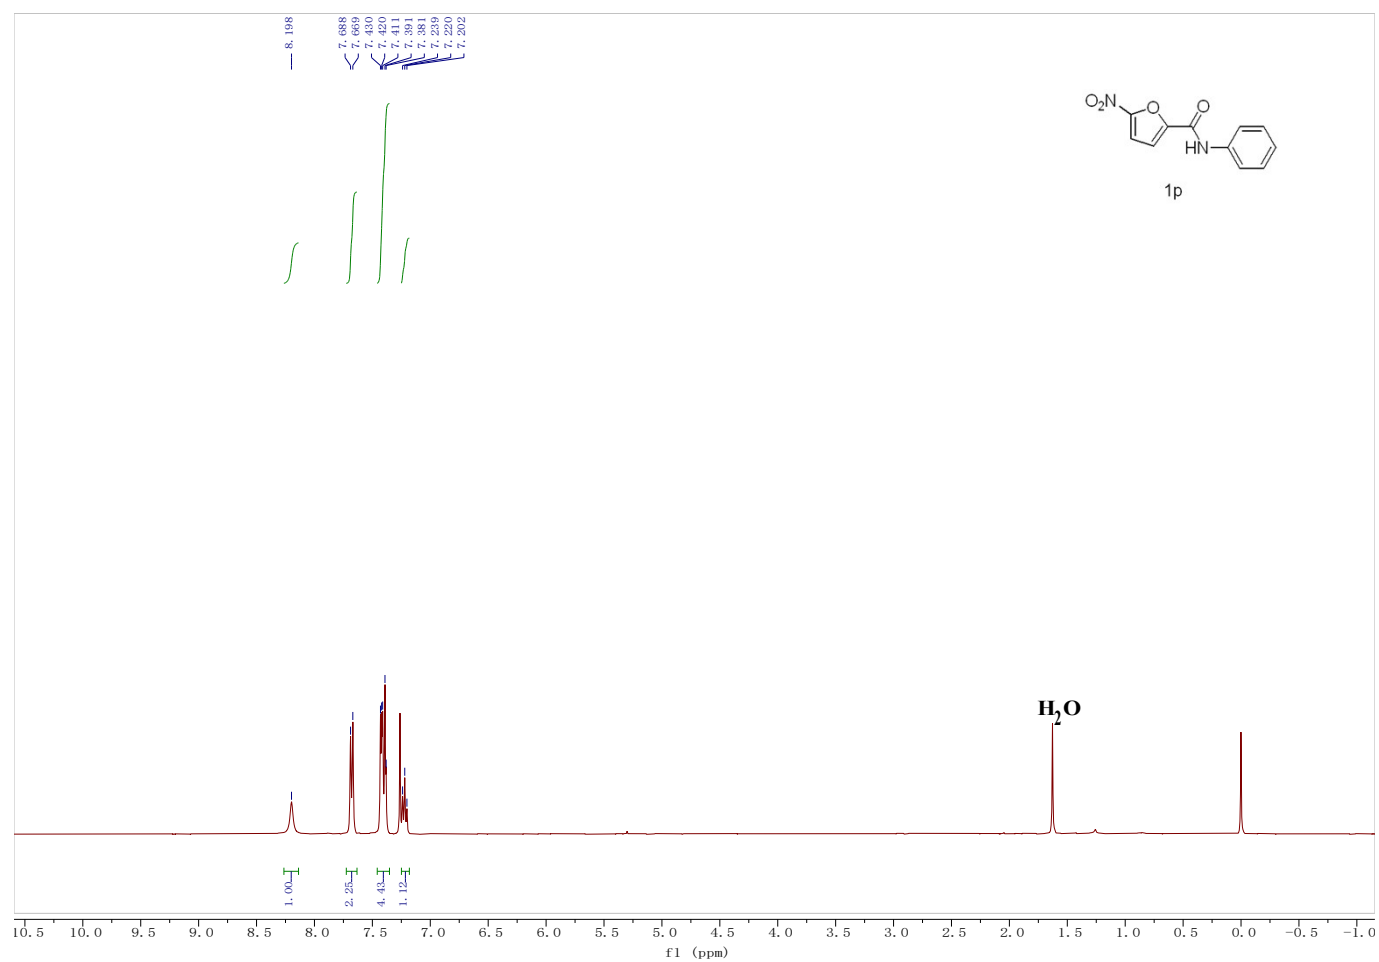

$^1\text{H}$  NMR (400 MHz) in  $\text{CDCl}_3$

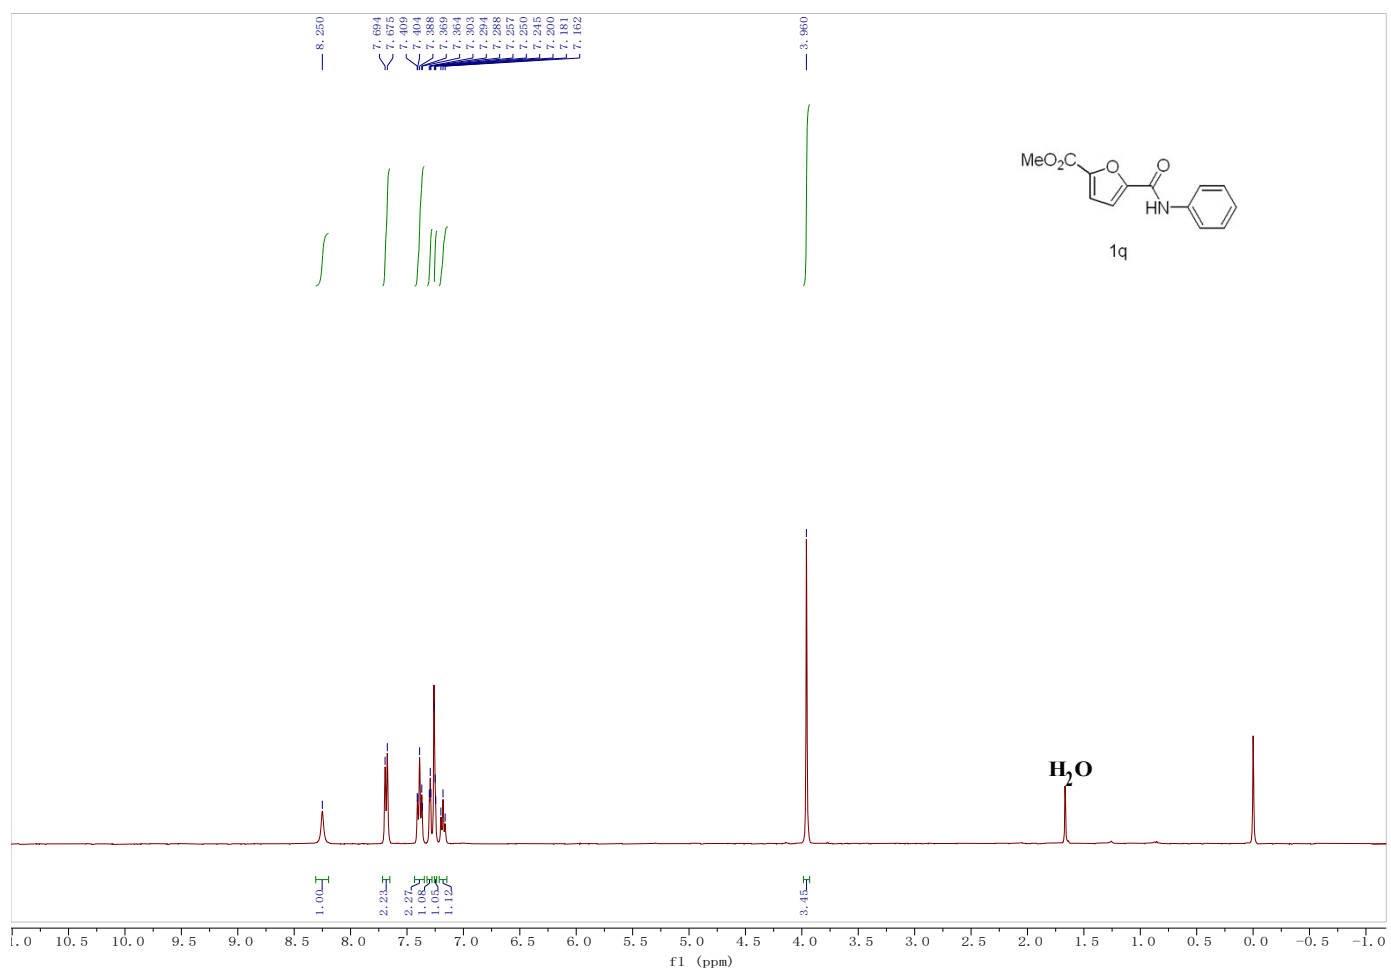

$^1\text{H}$  NMR (400 MHz) in  $\text{CDCl}_3$

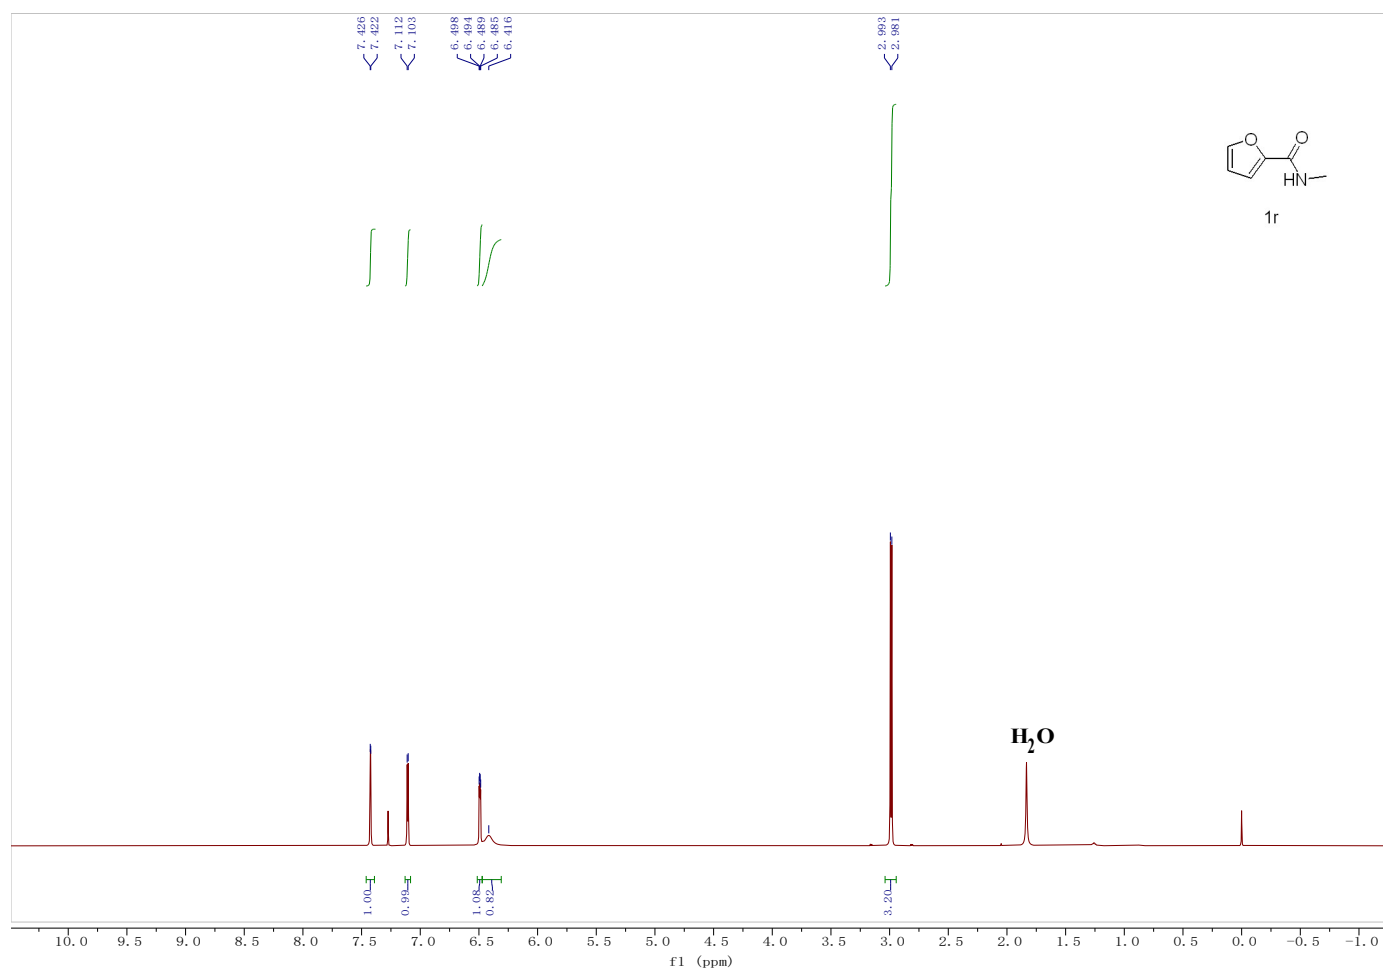

$^1\text{H}$  NMR (400 MHz) in  $\text{CDCl}_3$

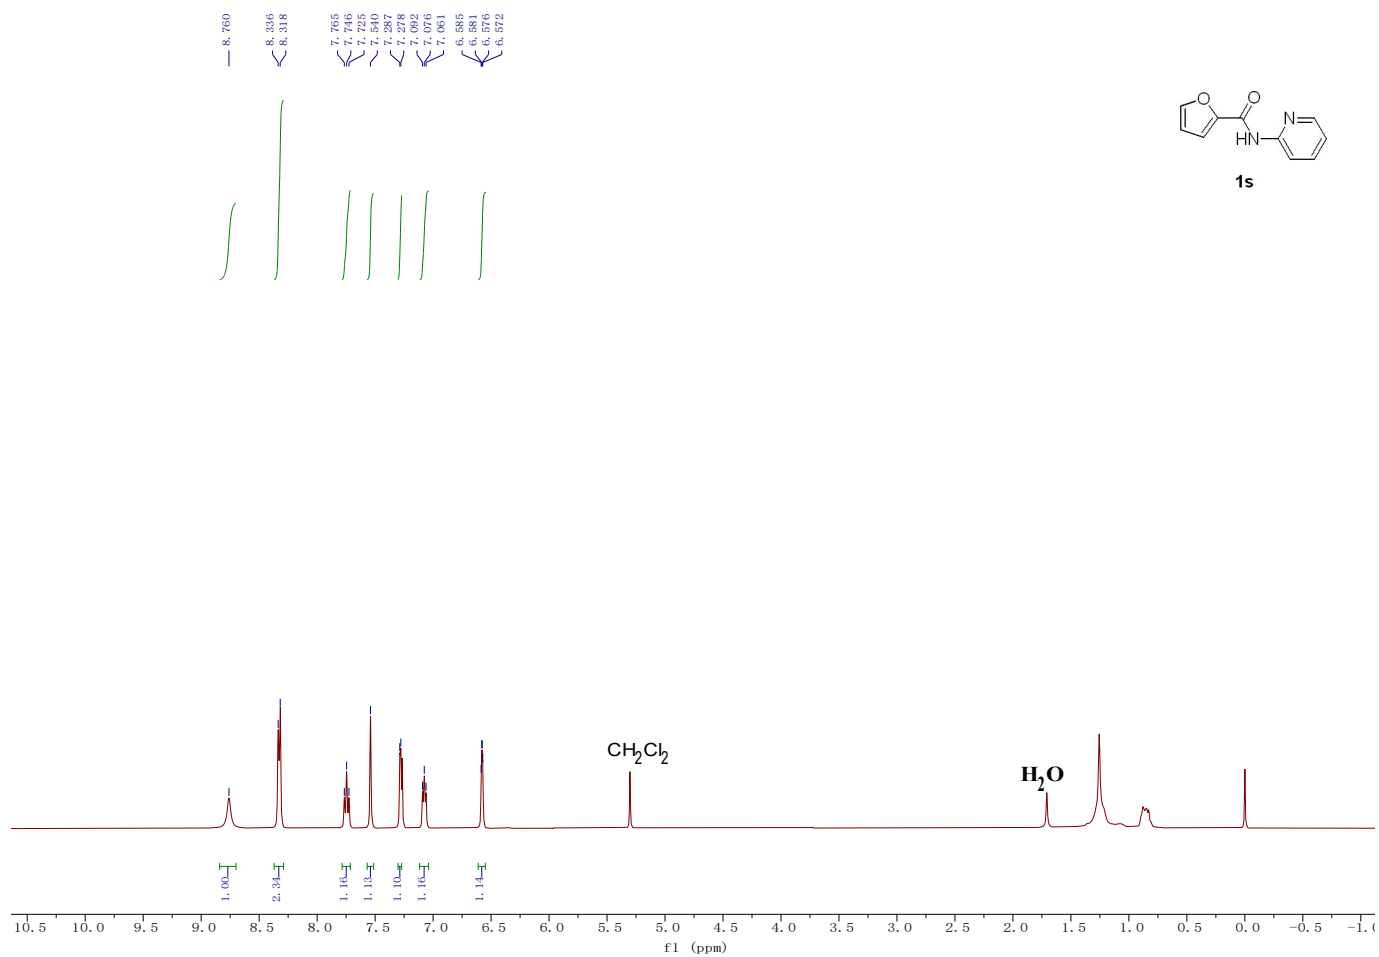

$^1\text{H}$  NMR (400 MHz) in  $\text{CDCl}_3$

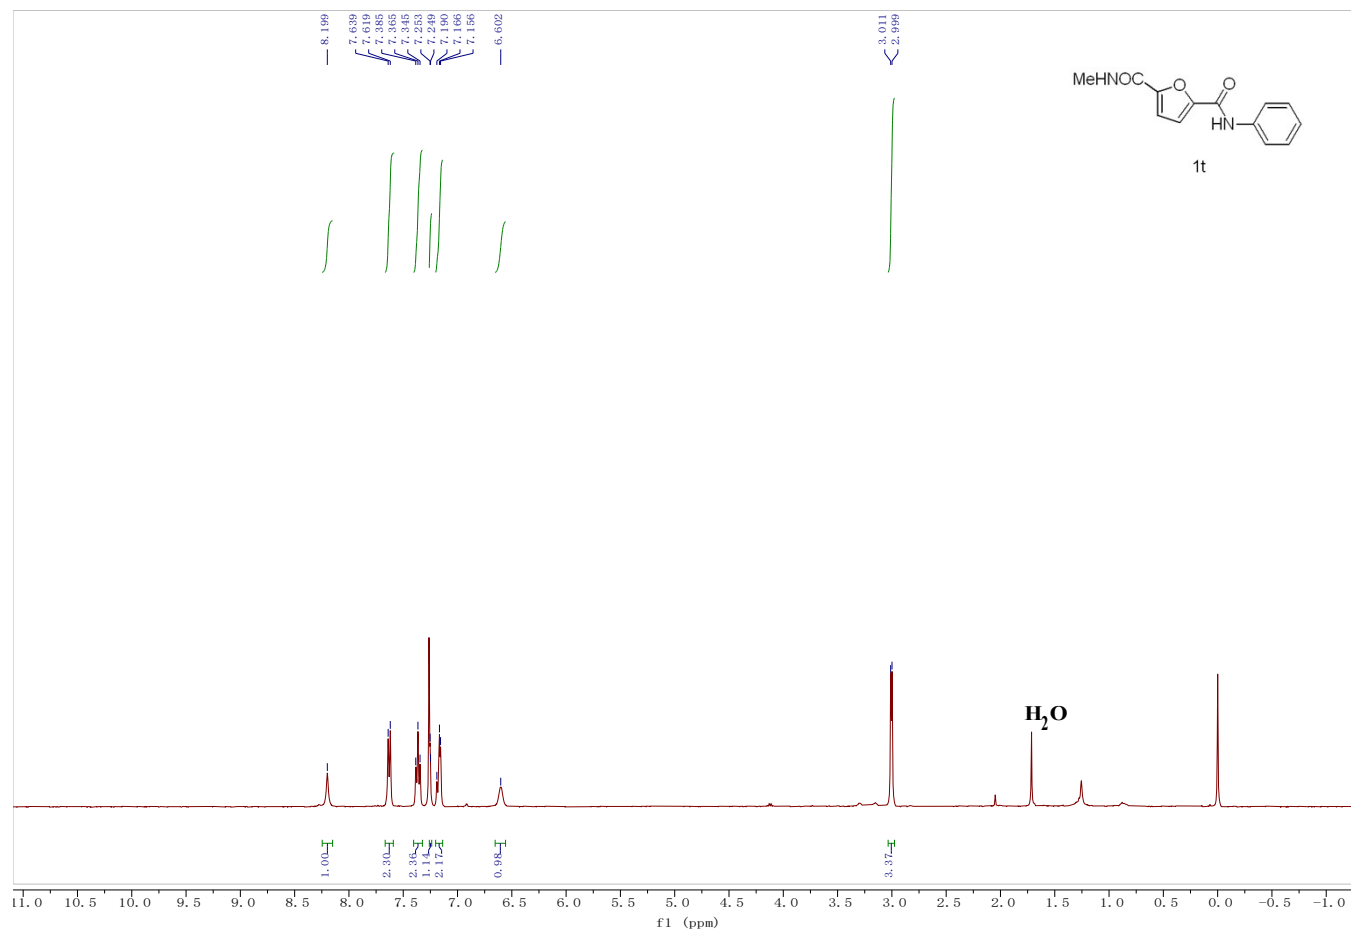

$^{13}\text{C}$  NMR (400 MHz) in  $\text{DMSO-}d_6$

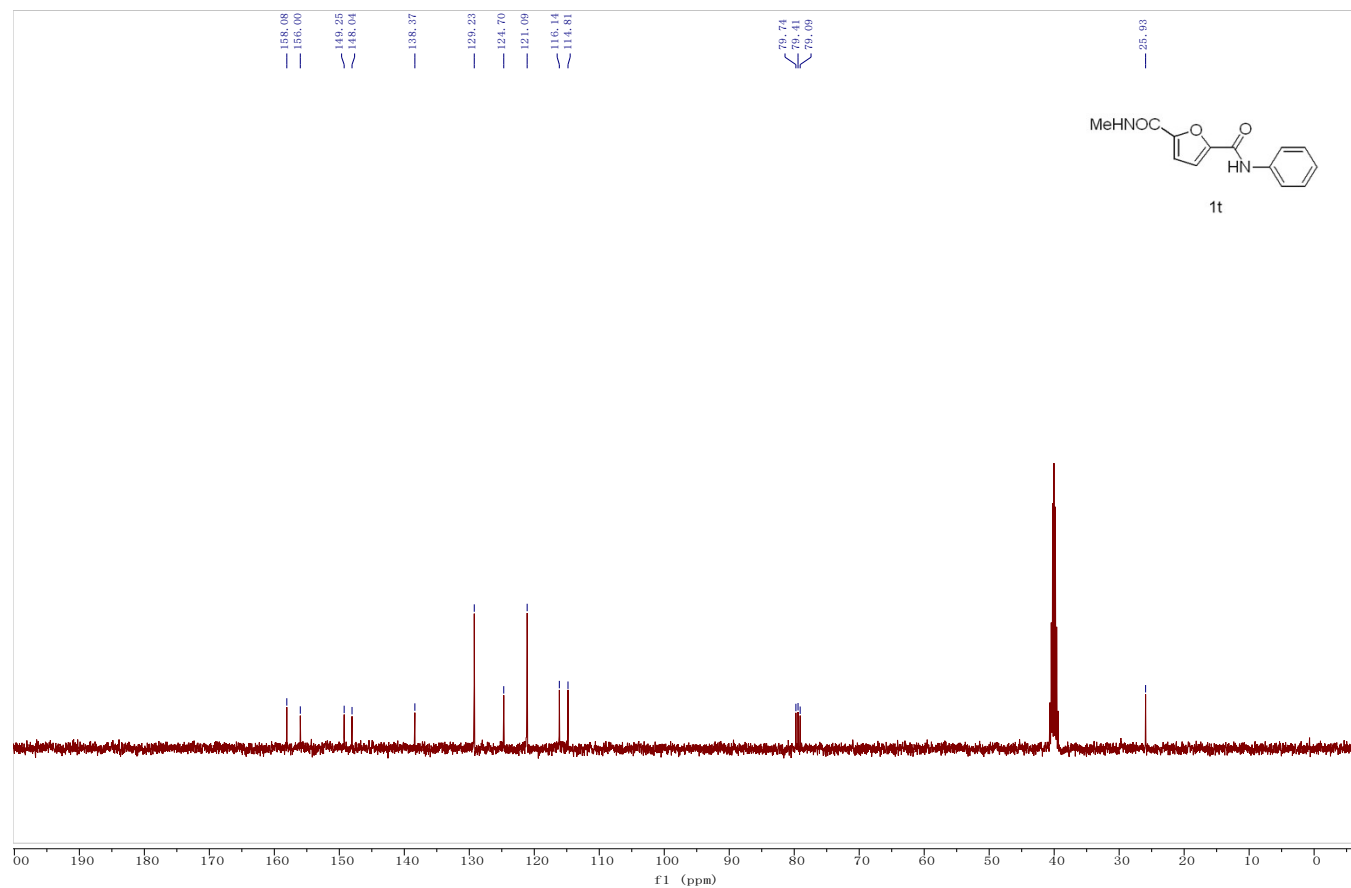

$^1\text{H}$  NMR (400 MHz) in  $\text{CDCl}_3$

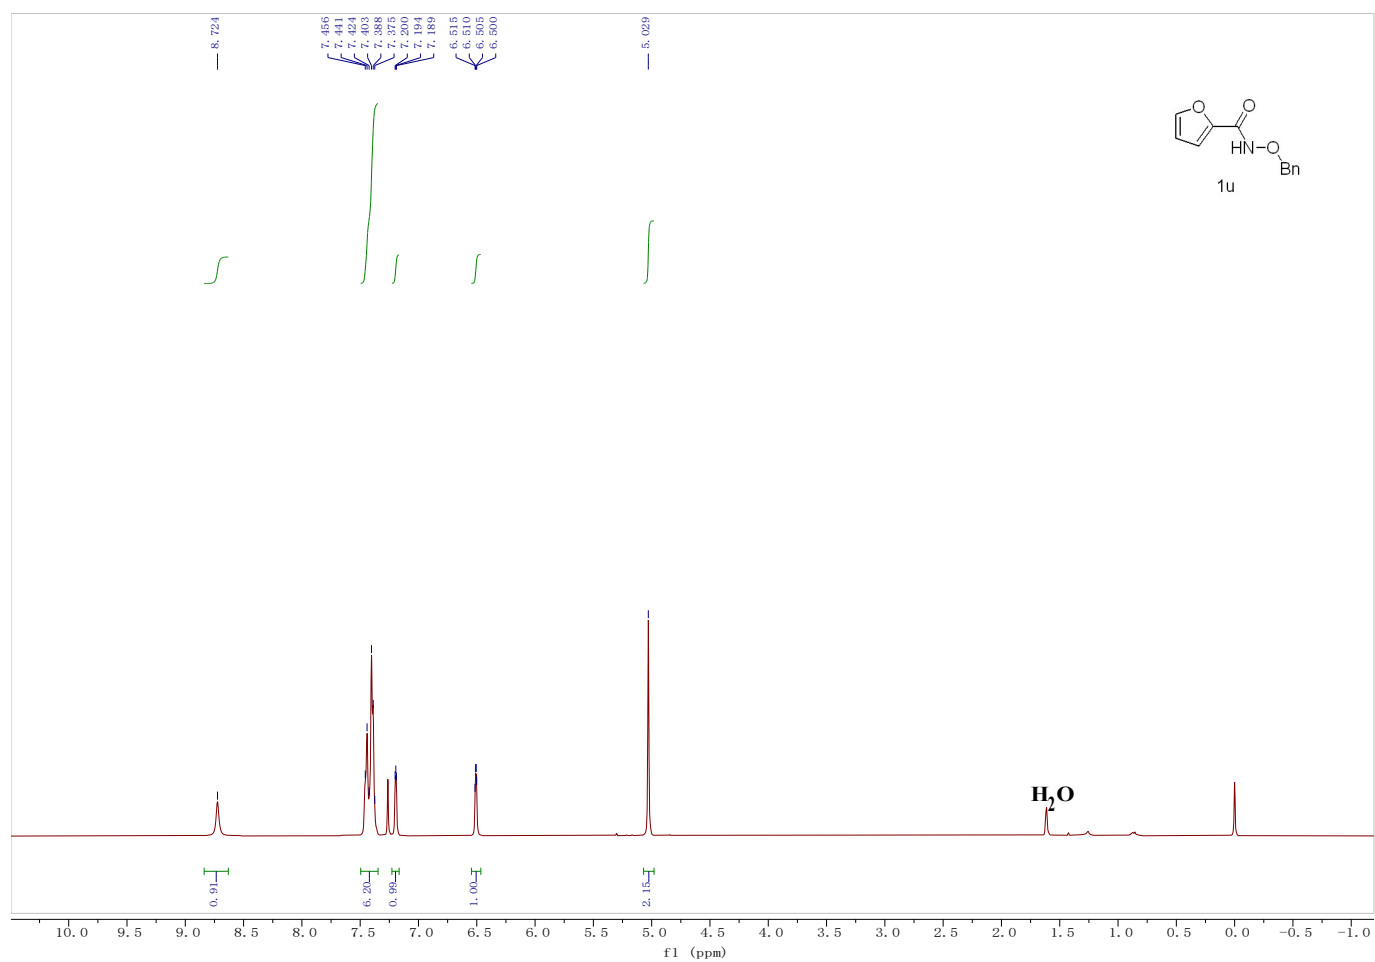

$^1\text{H}$  NMR (400 MHz) in  $\text{CDCl}_3$

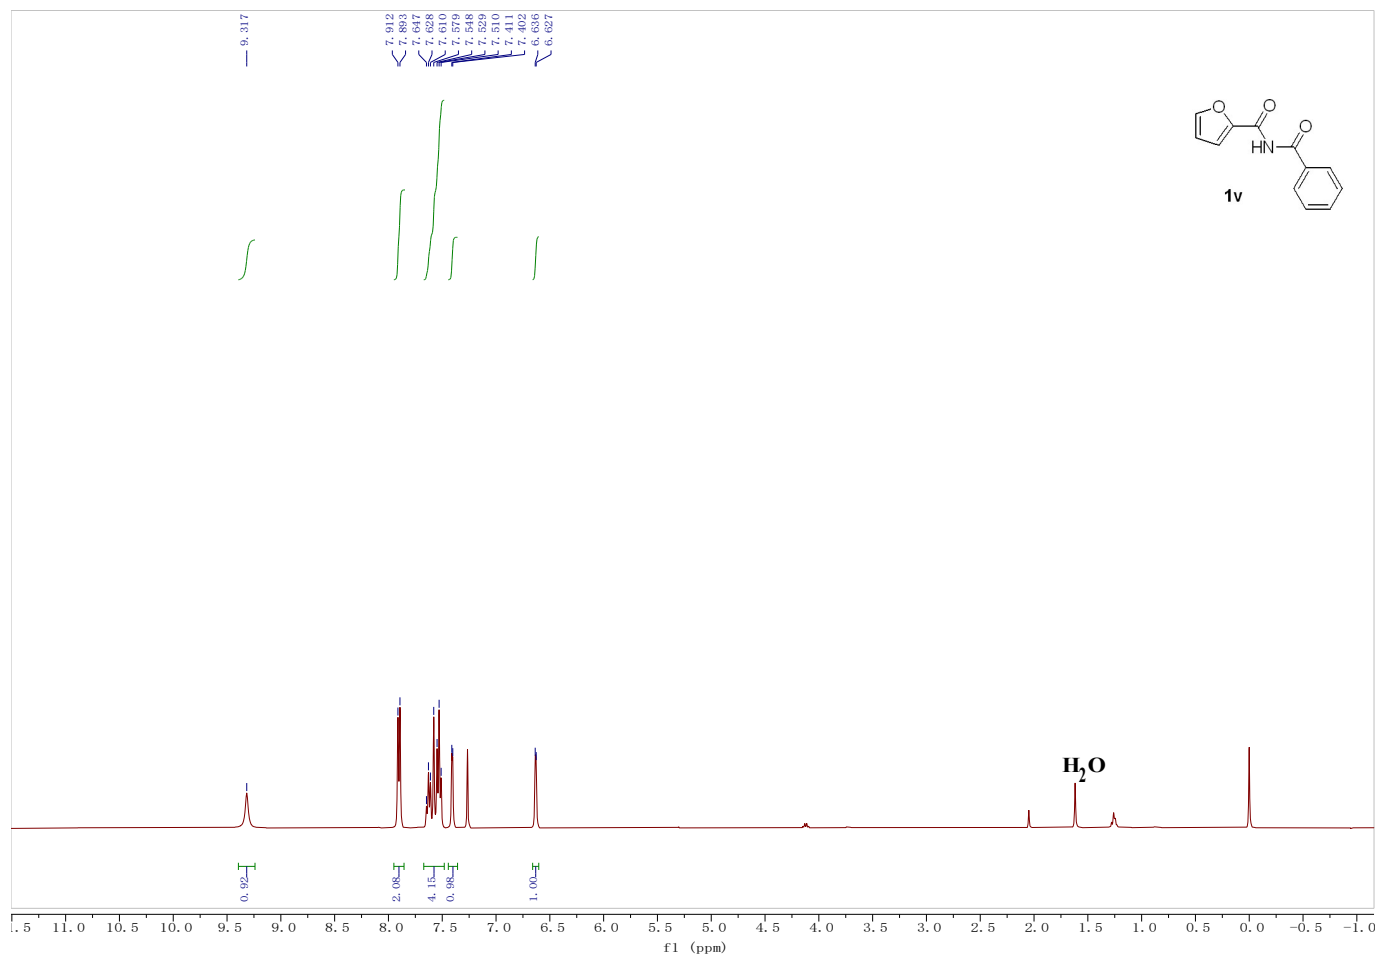

<sup>1</sup>H NMR (400 MHz) in DMSO-*d*<sub>6</sub>

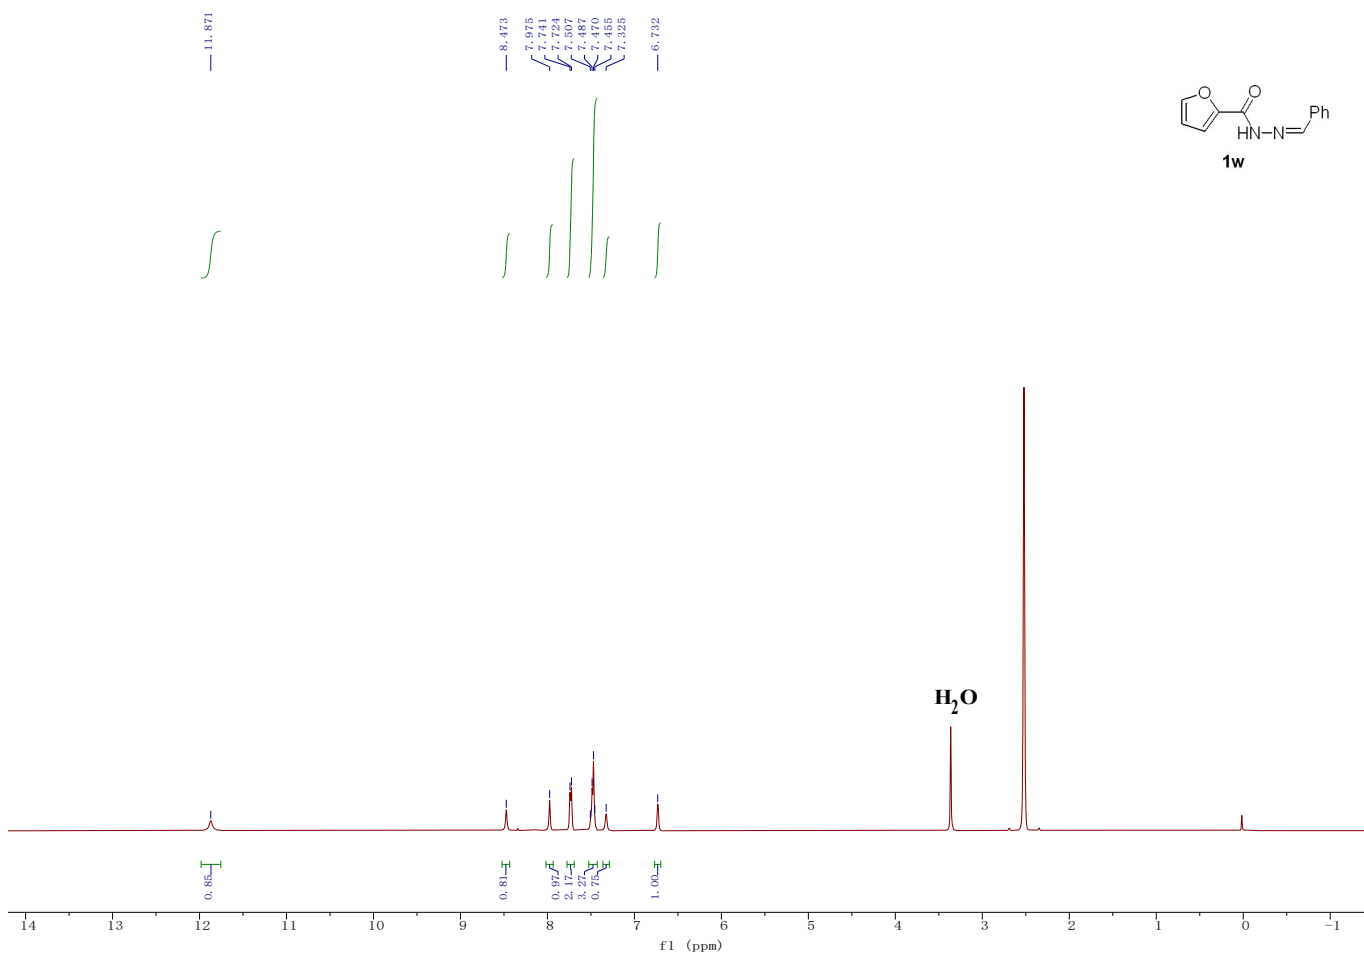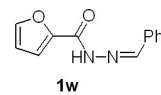

$^1\text{H}$  NMR (400 MHz) in  $\text{CDCl}_3$

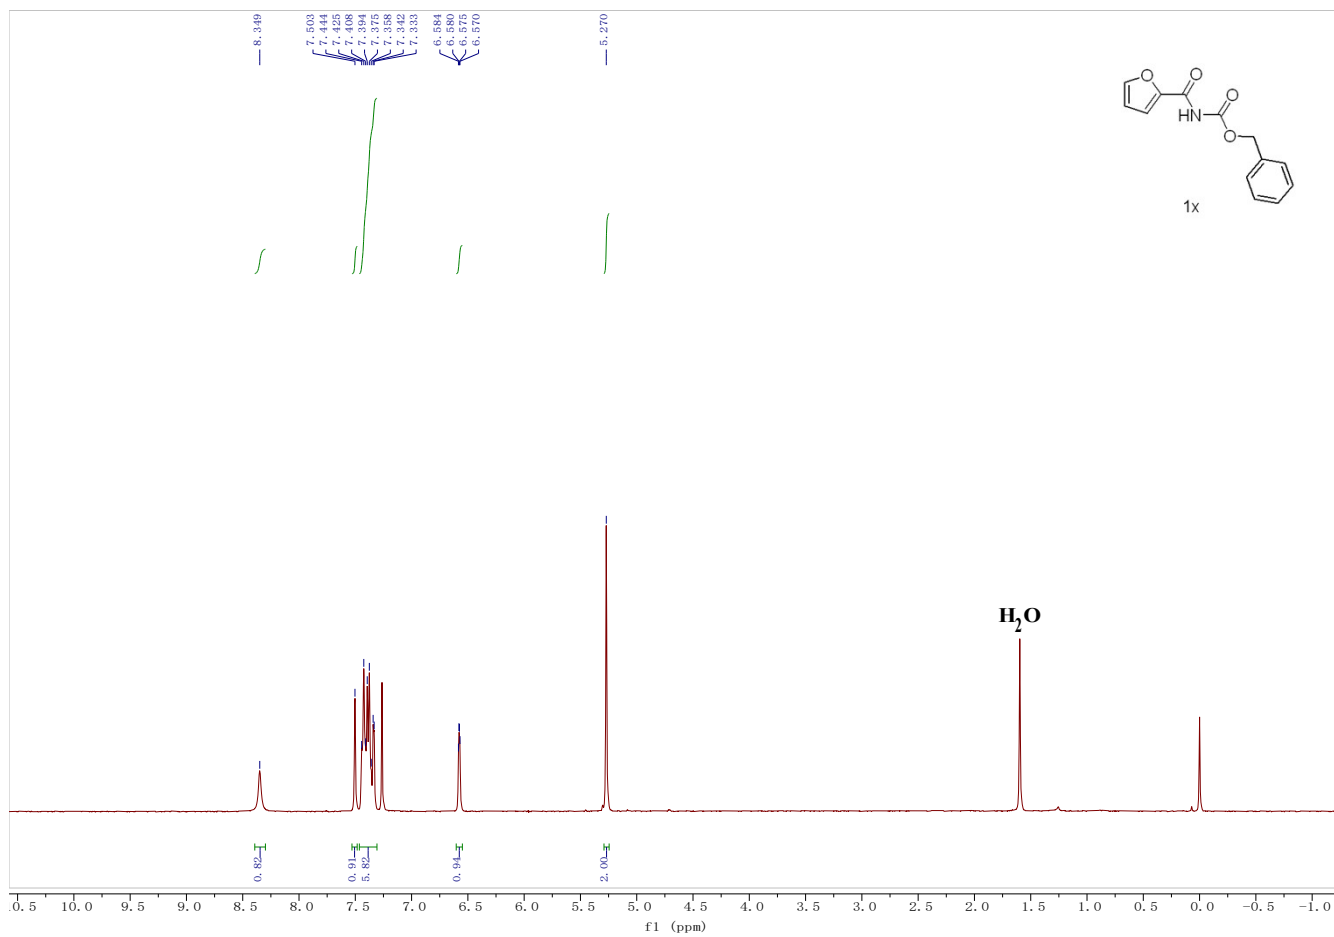

$^{13}\text{C}$  NMR (101 MHz) in  $\text{CDCl}_3$

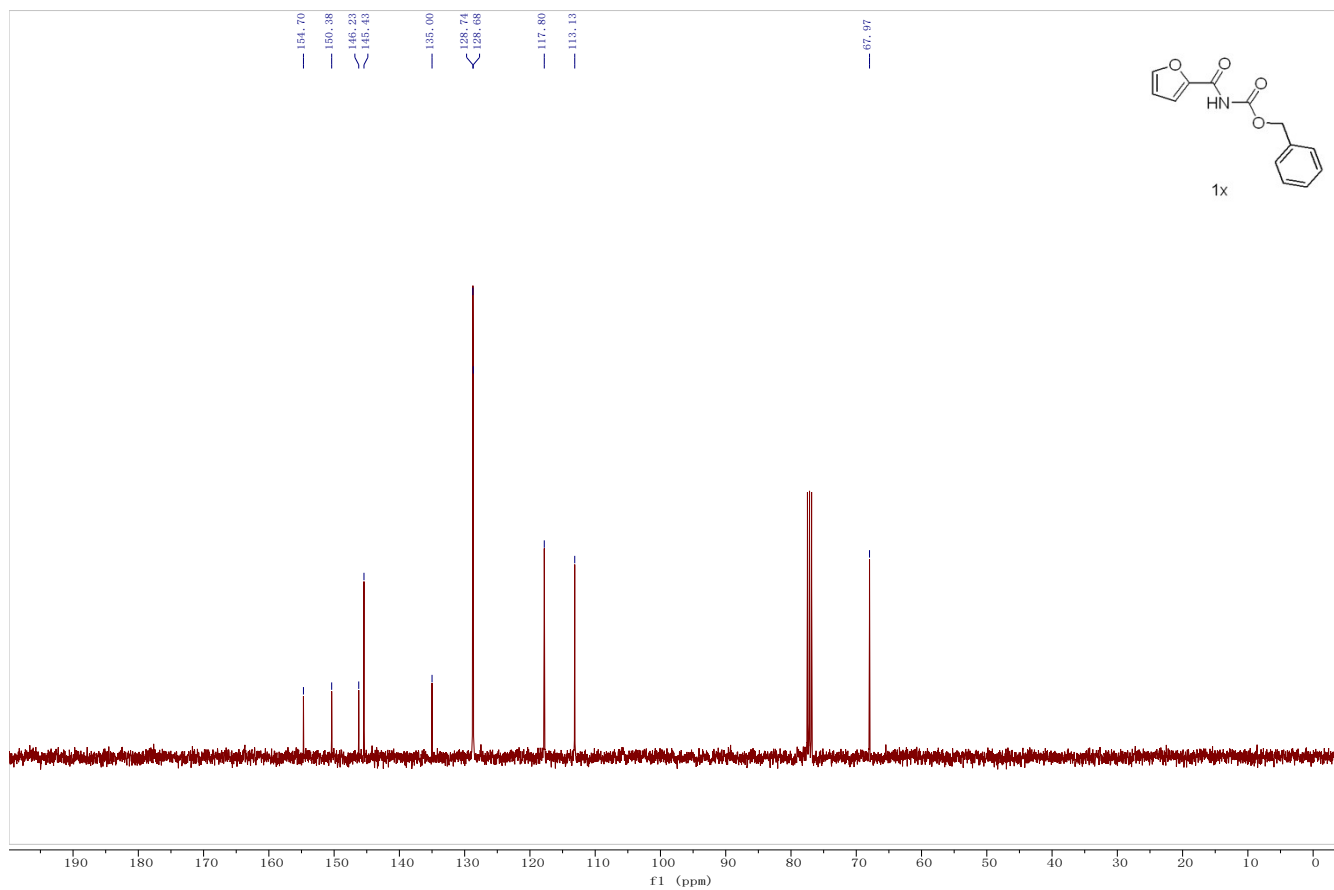

<sup>1</sup>H NMR (400 MHz) in CDCl<sub>3</sub>

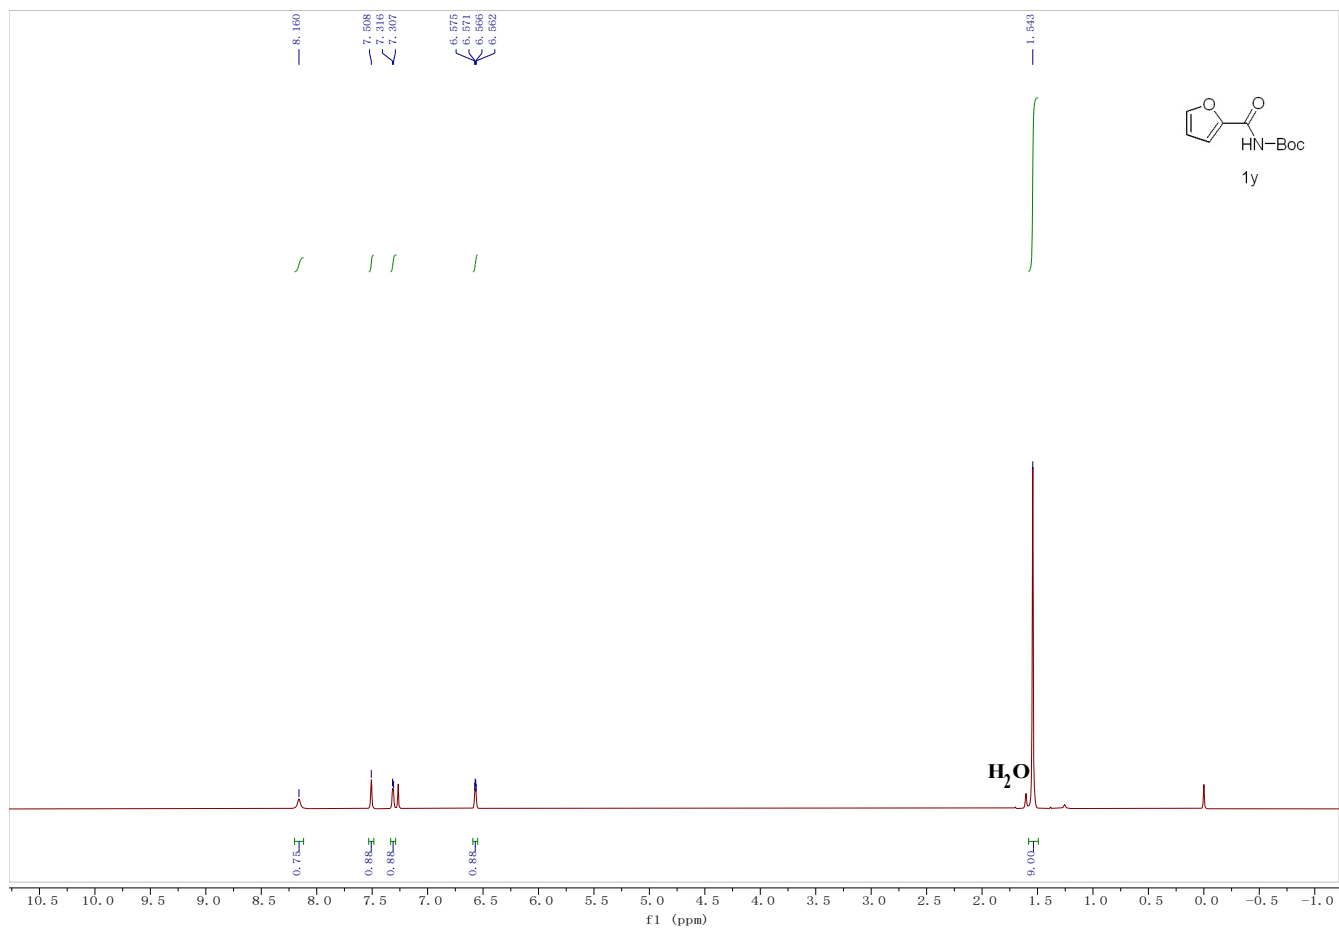

<sup>13</sup>C NMR (101 MHz) in CDCl<sub>3</sub>

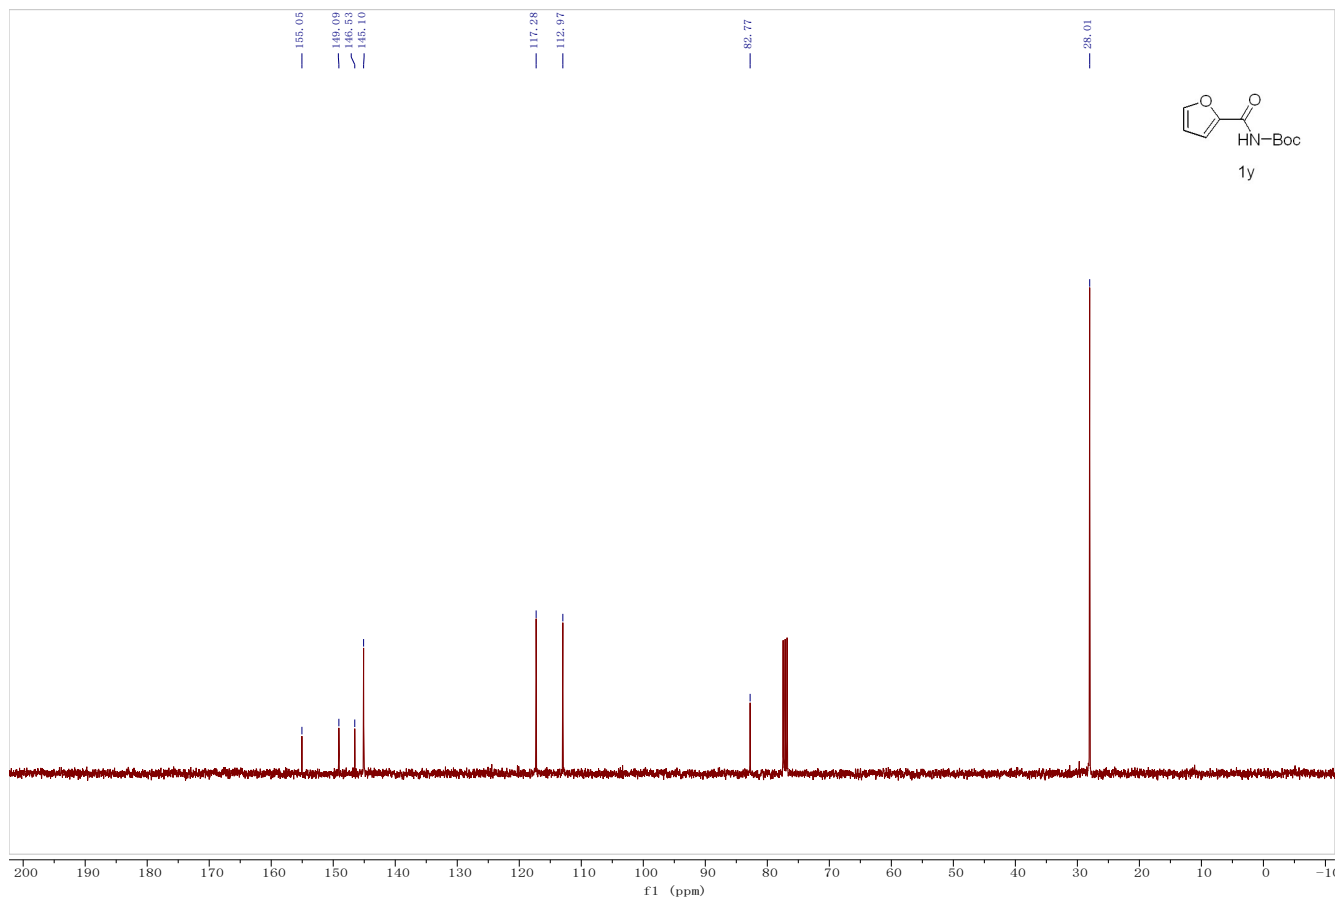

$^1\text{H}$  NMR (400 MHz) in  $\text{CDCl}_3$

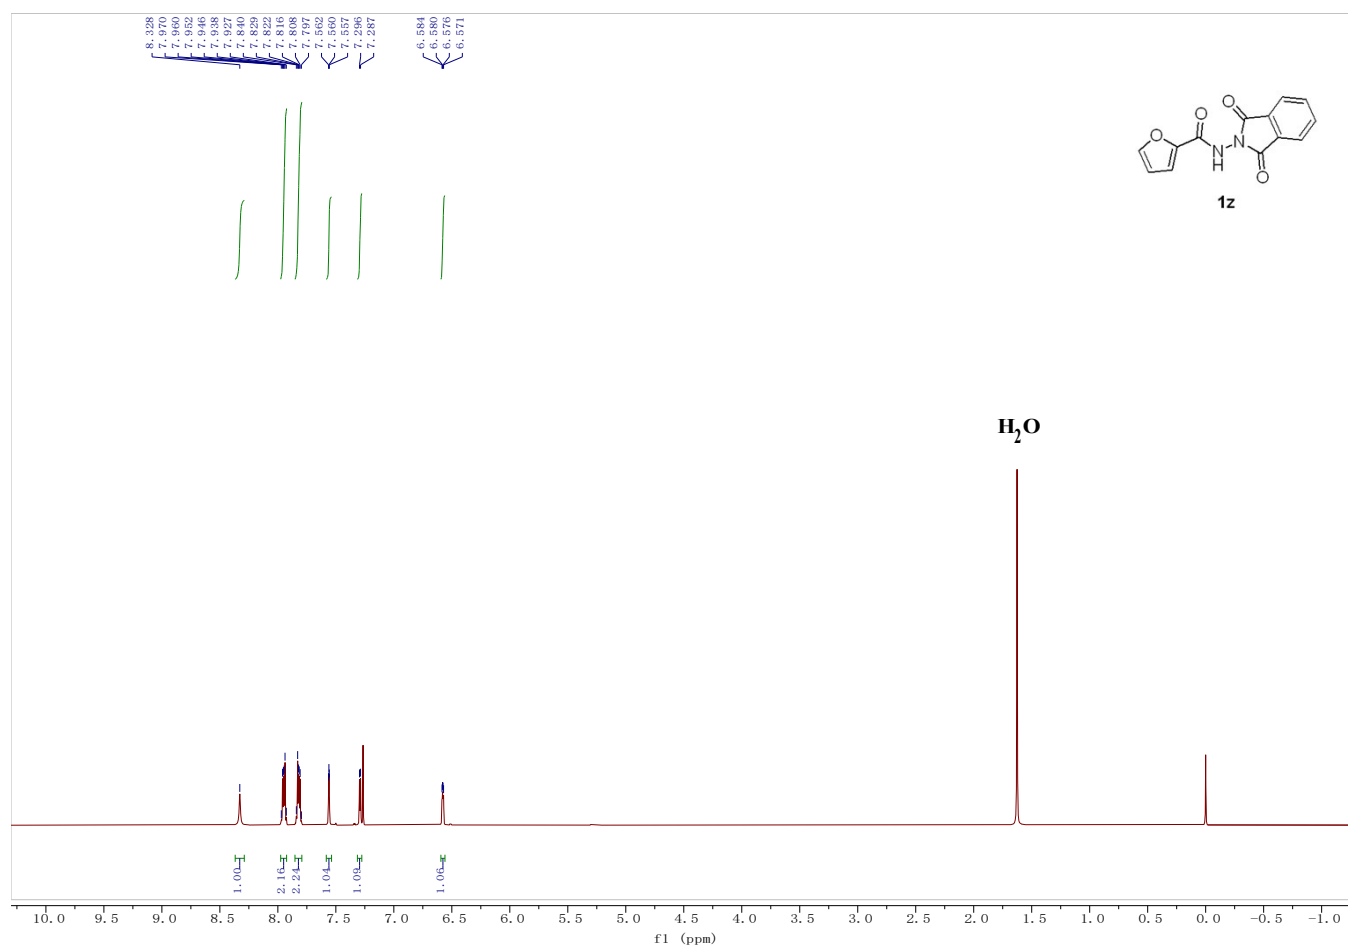

$^1\text{H}$  NMR (400 MHz) in  $\text{CDCl}_3$

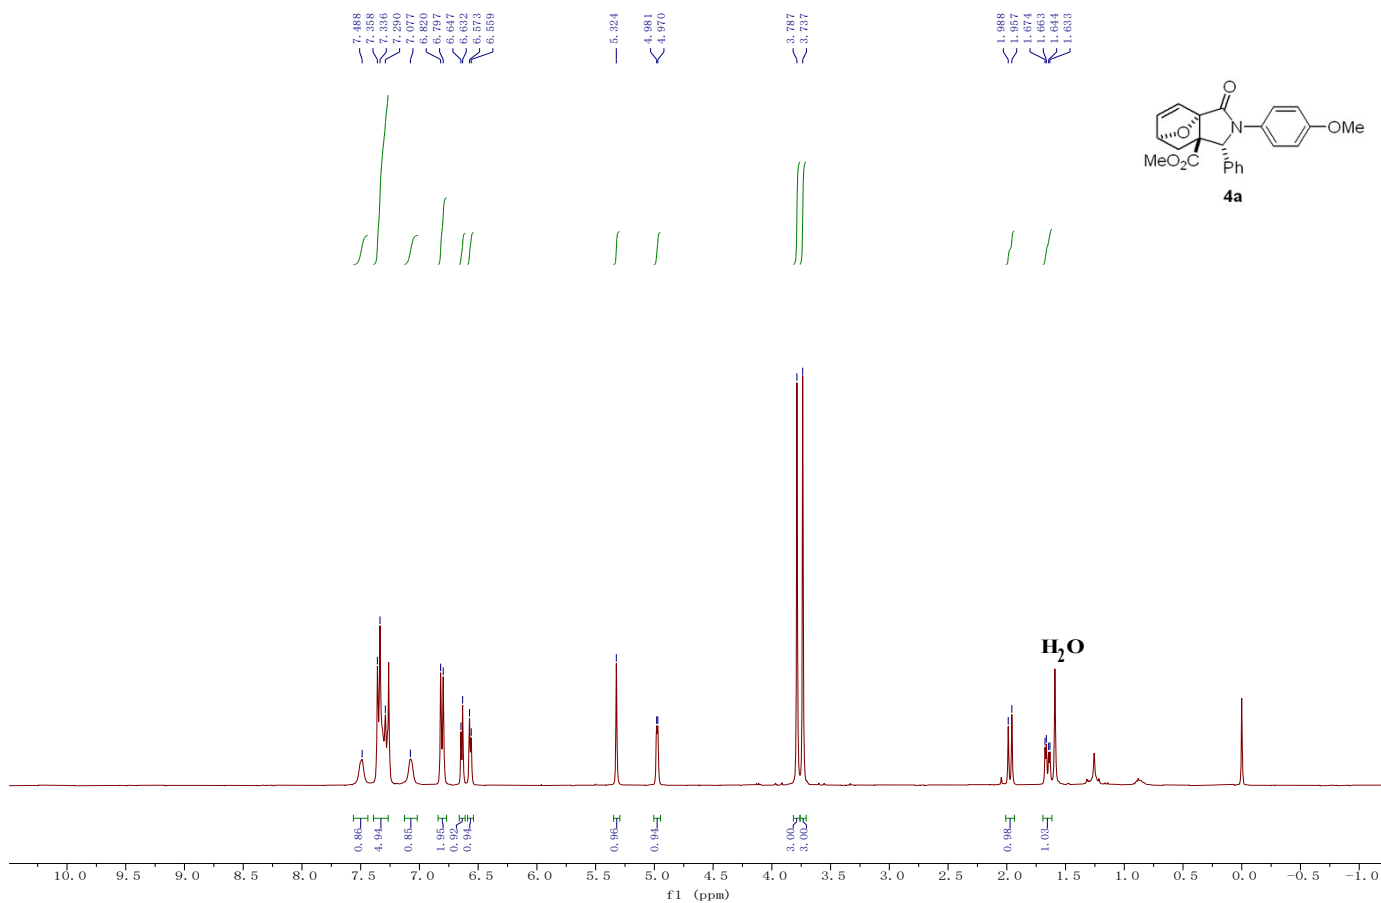

$^{13}\text{C}$  NMR (101 MHz) in  $\text{CDCl}_3$

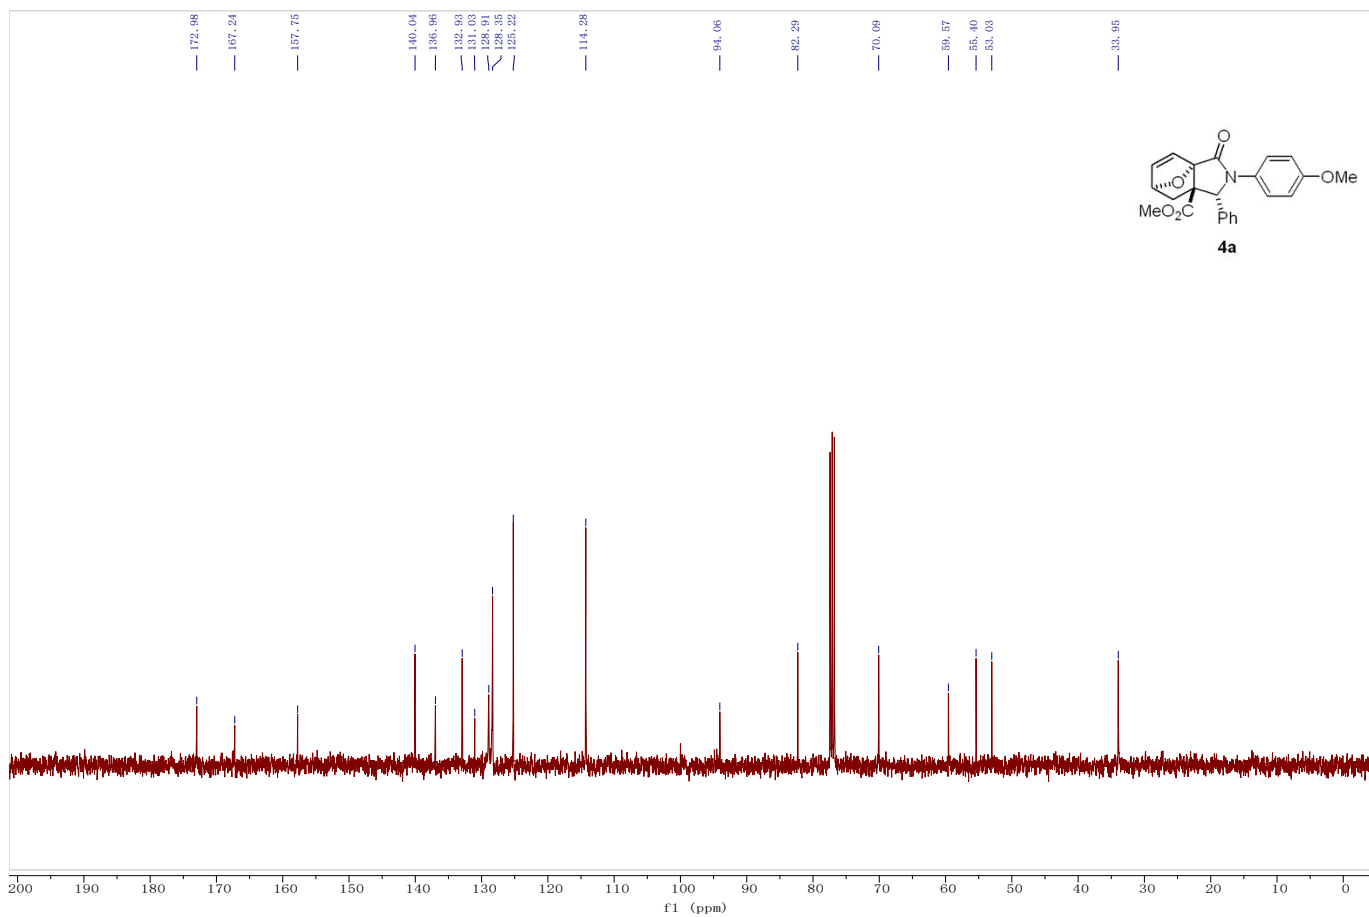

$^1\text{H}$  NMR (400 MHz) in  $\text{CDCl}_3$

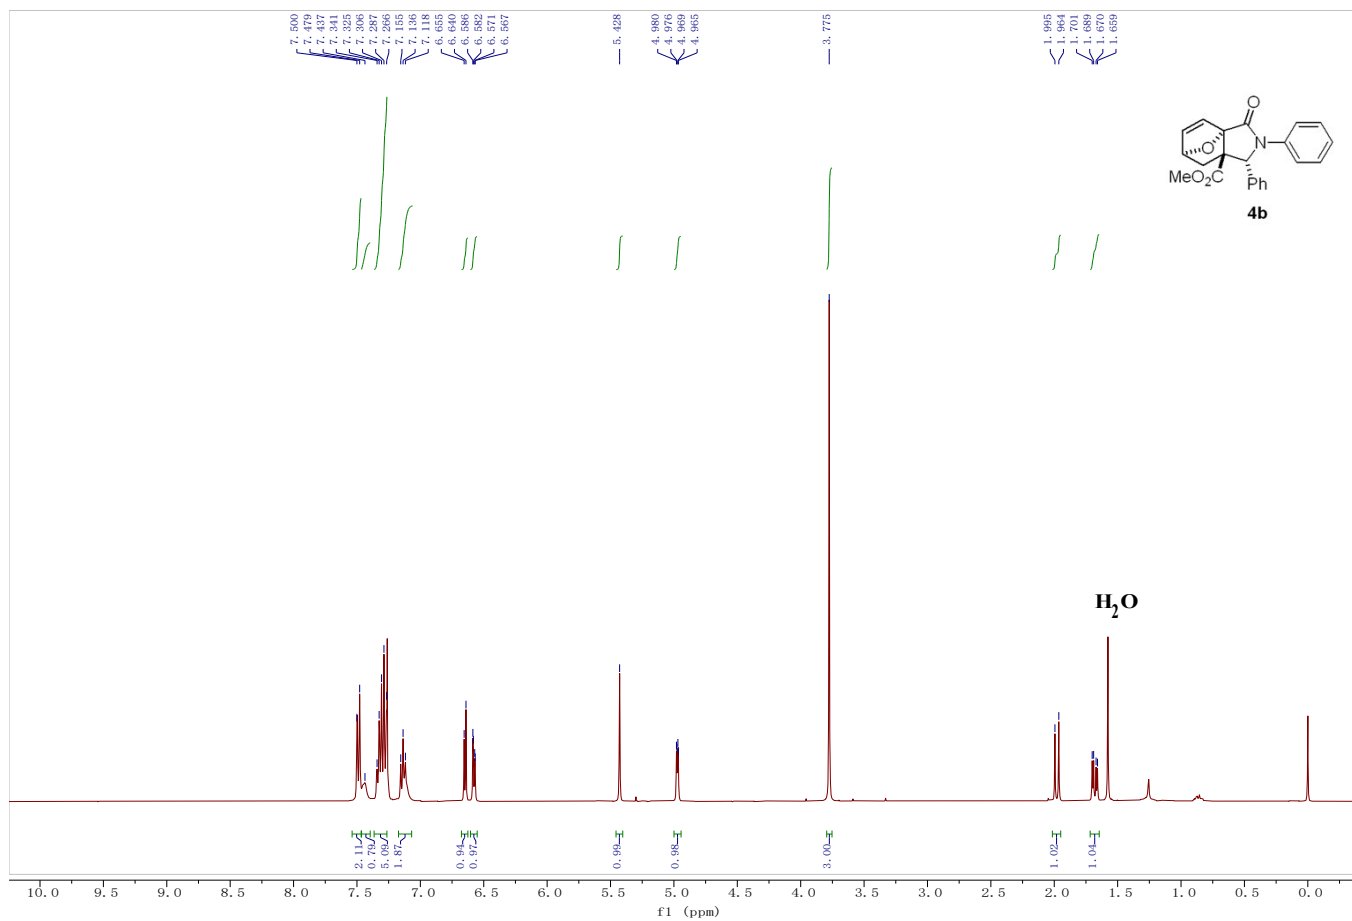

$^{13}\text{C}$  NMR (101 MHz) in  $\text{CDCl}_3$

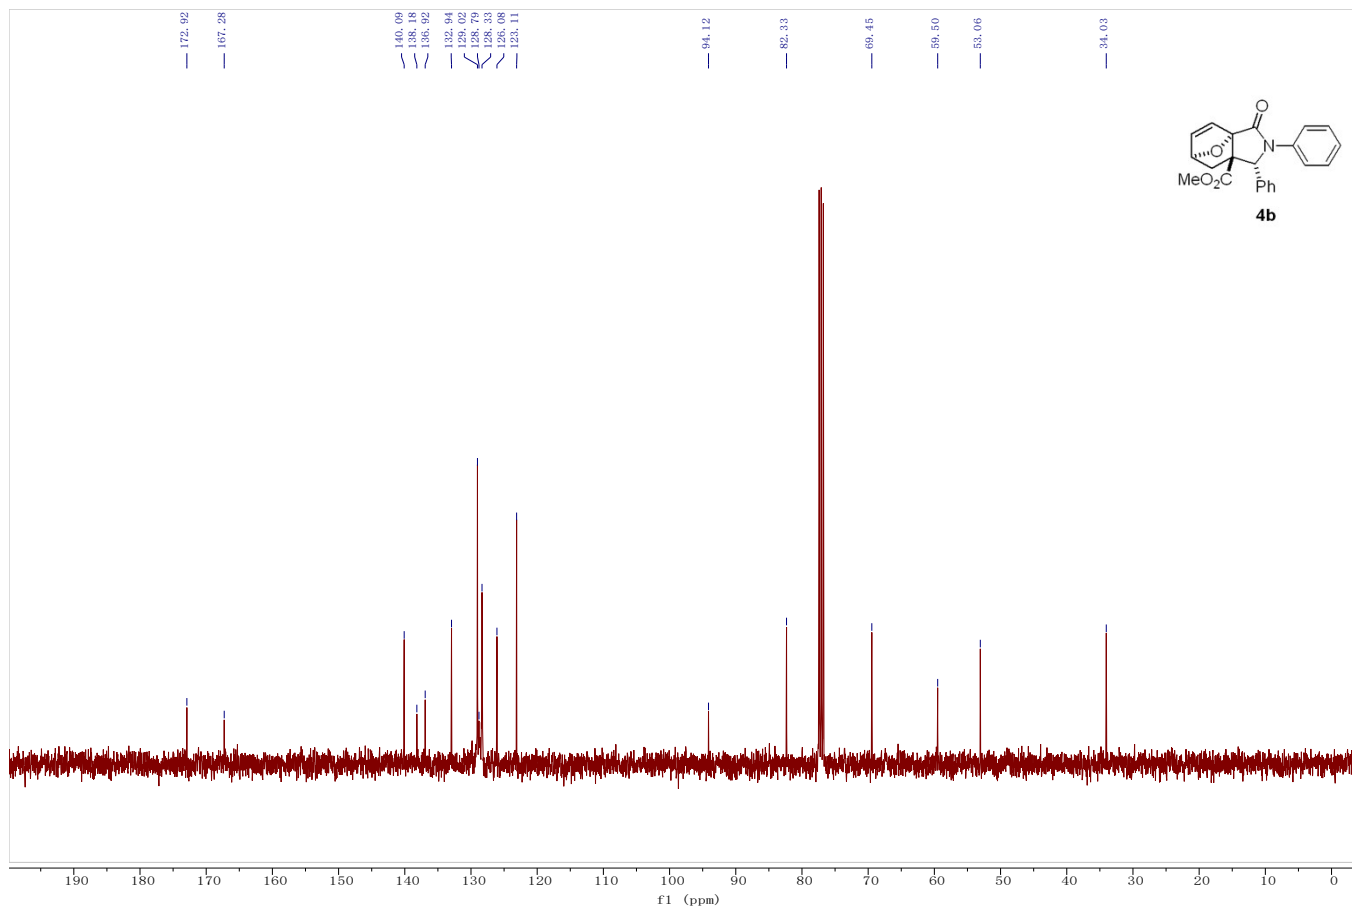

$^1\text{H}$  NMR (400 MHz) in  $\text{CDCl}_3$

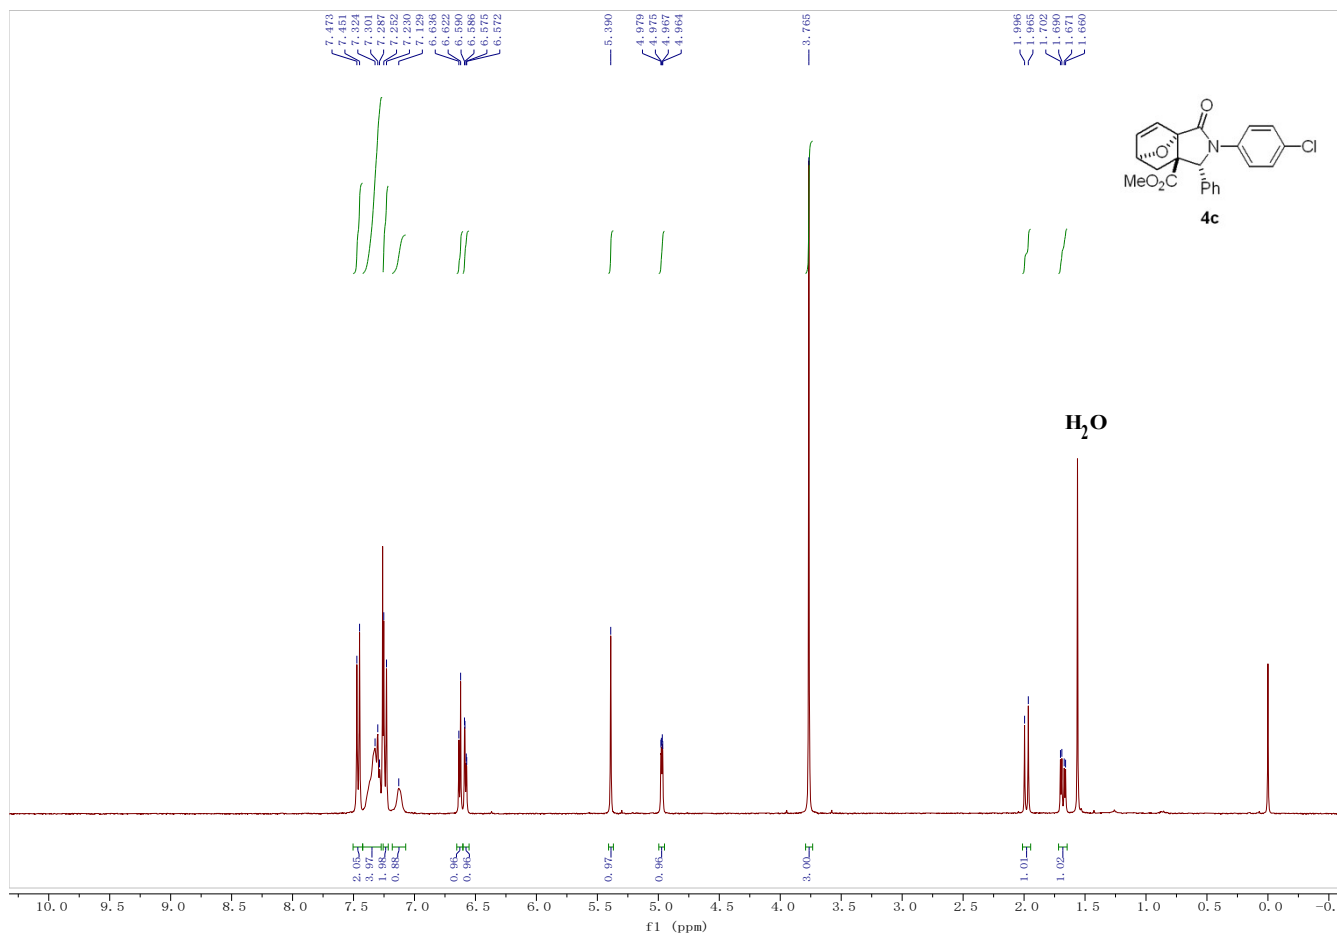

$^{13}\text{C}$  NMR (101 MHz) in  $\text{CDCl}_3$

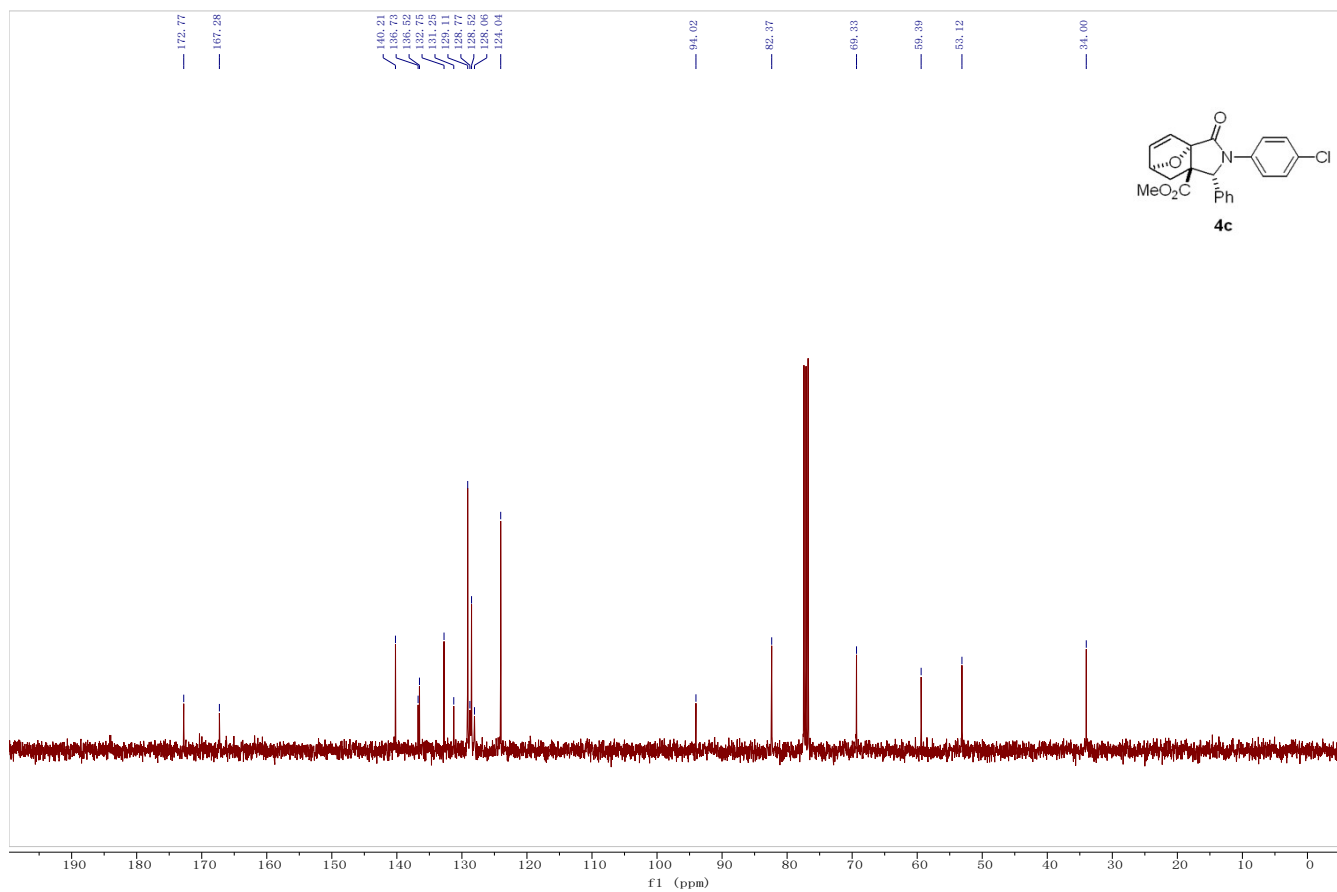

$^1\text{H}$  NMR (400 MHz) in  $\text{CDCl}_3$

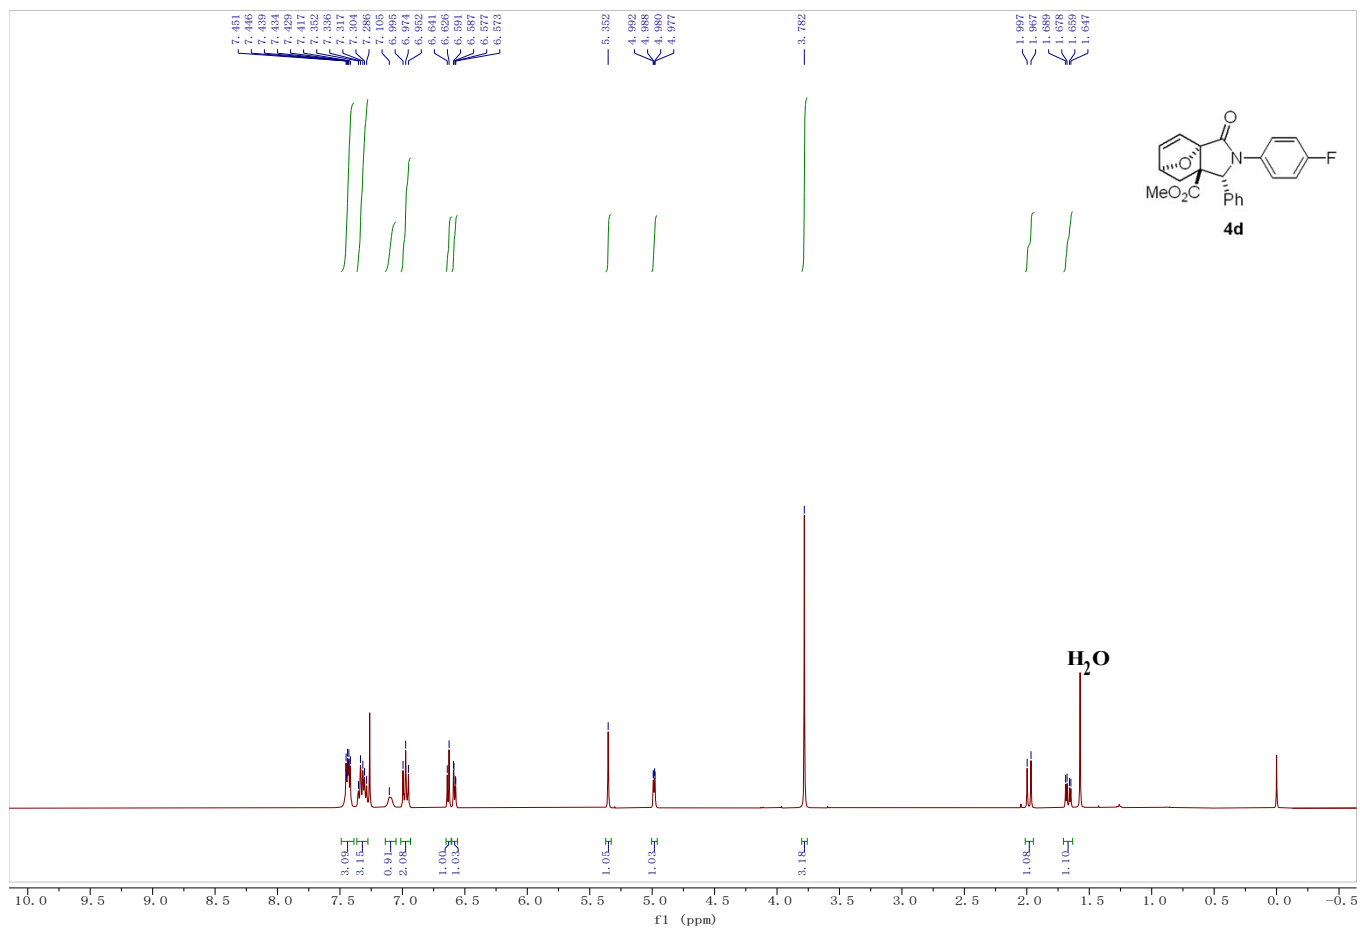

$^{13}\text{C}$  NMR (101 MHz) in  $\text{CDCl}_3$

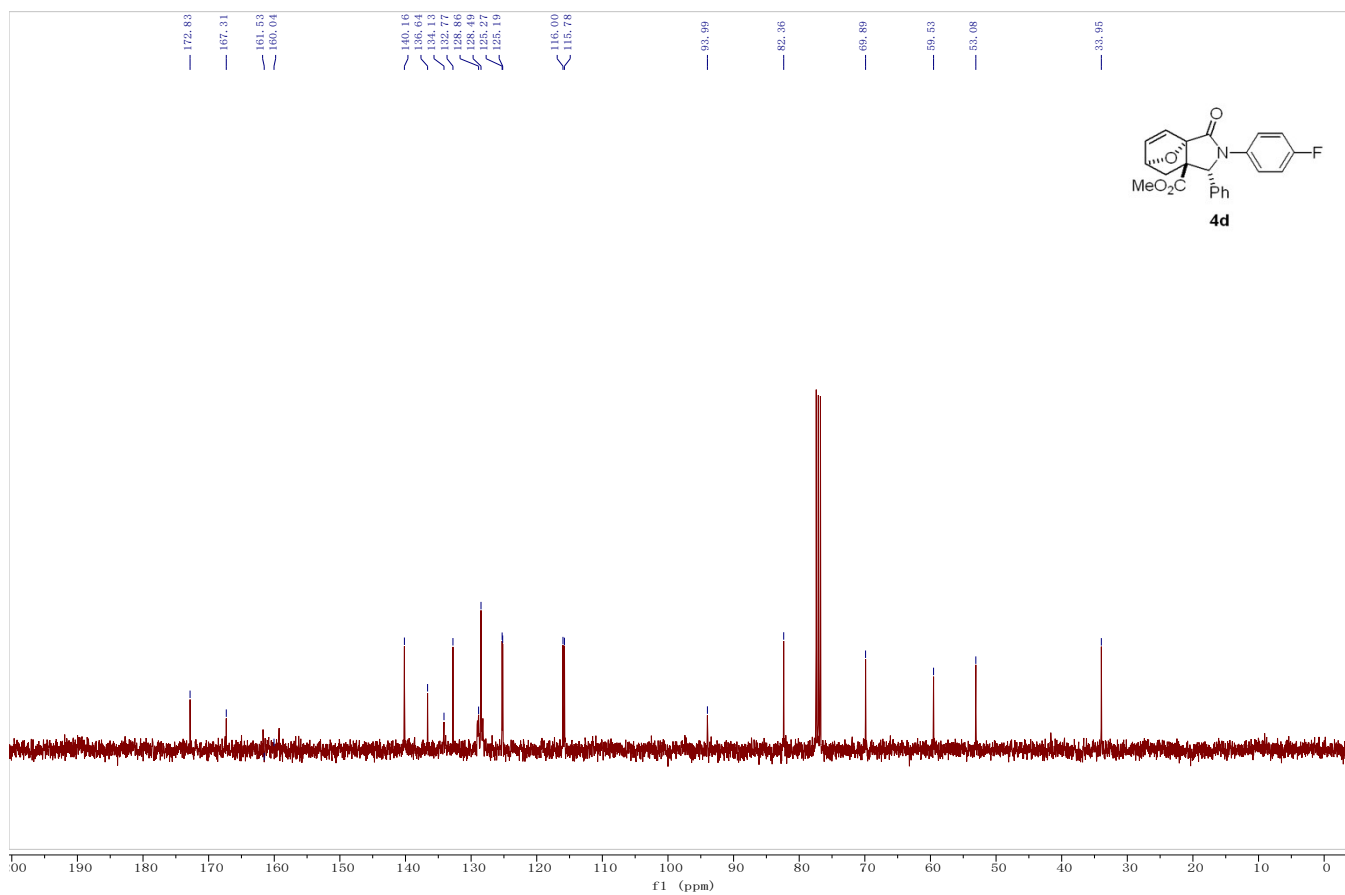

$^{19}\text{F}$  NMR (376 MHz) in  $\text{CDCl}_3$

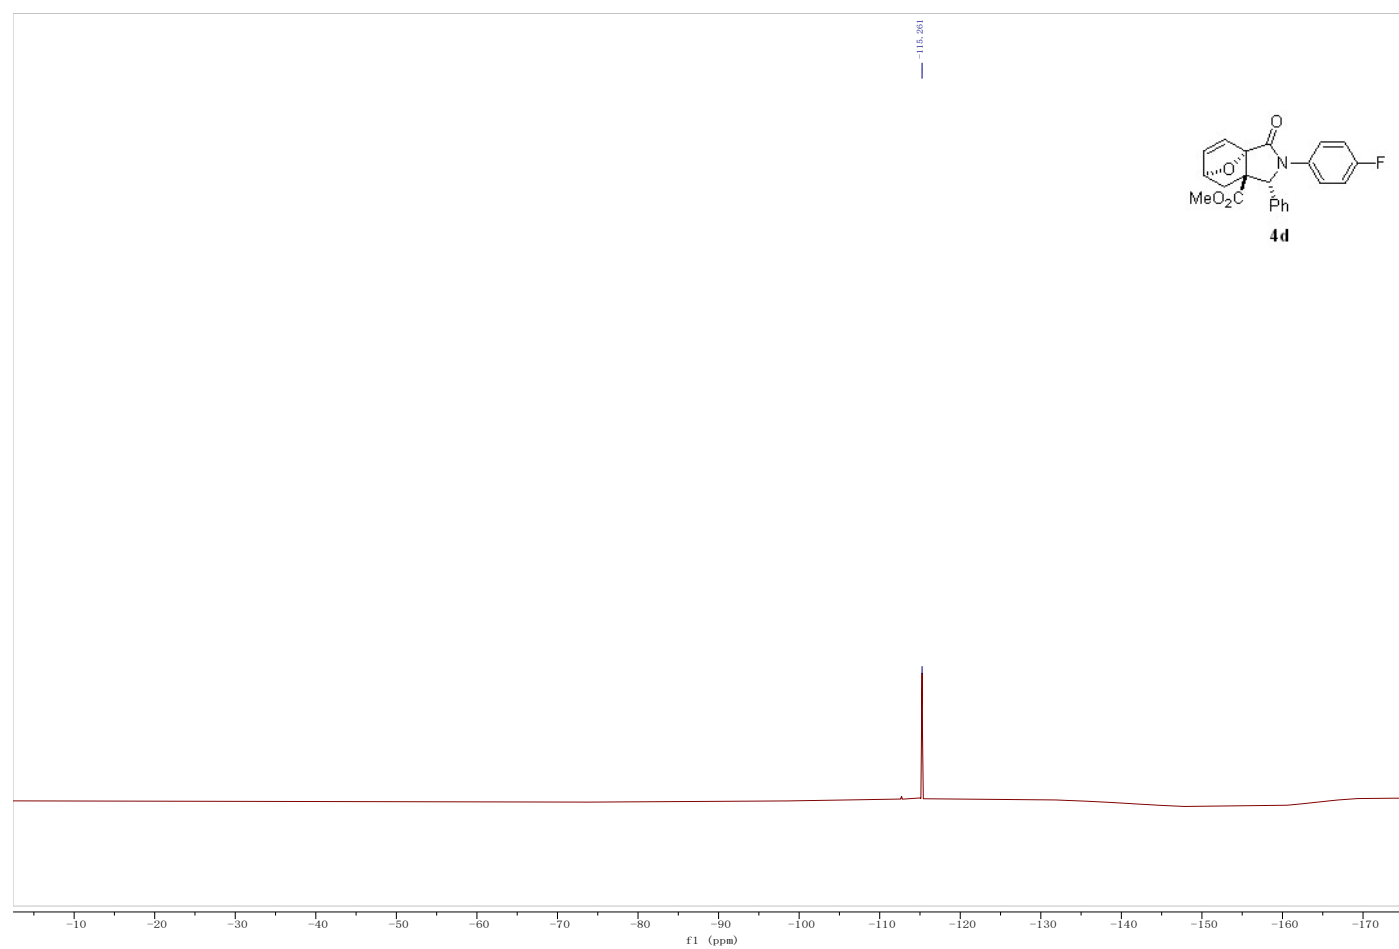

$^1\text{H}$  NMR (400 MHz) in  $\text{CDCl}_3$

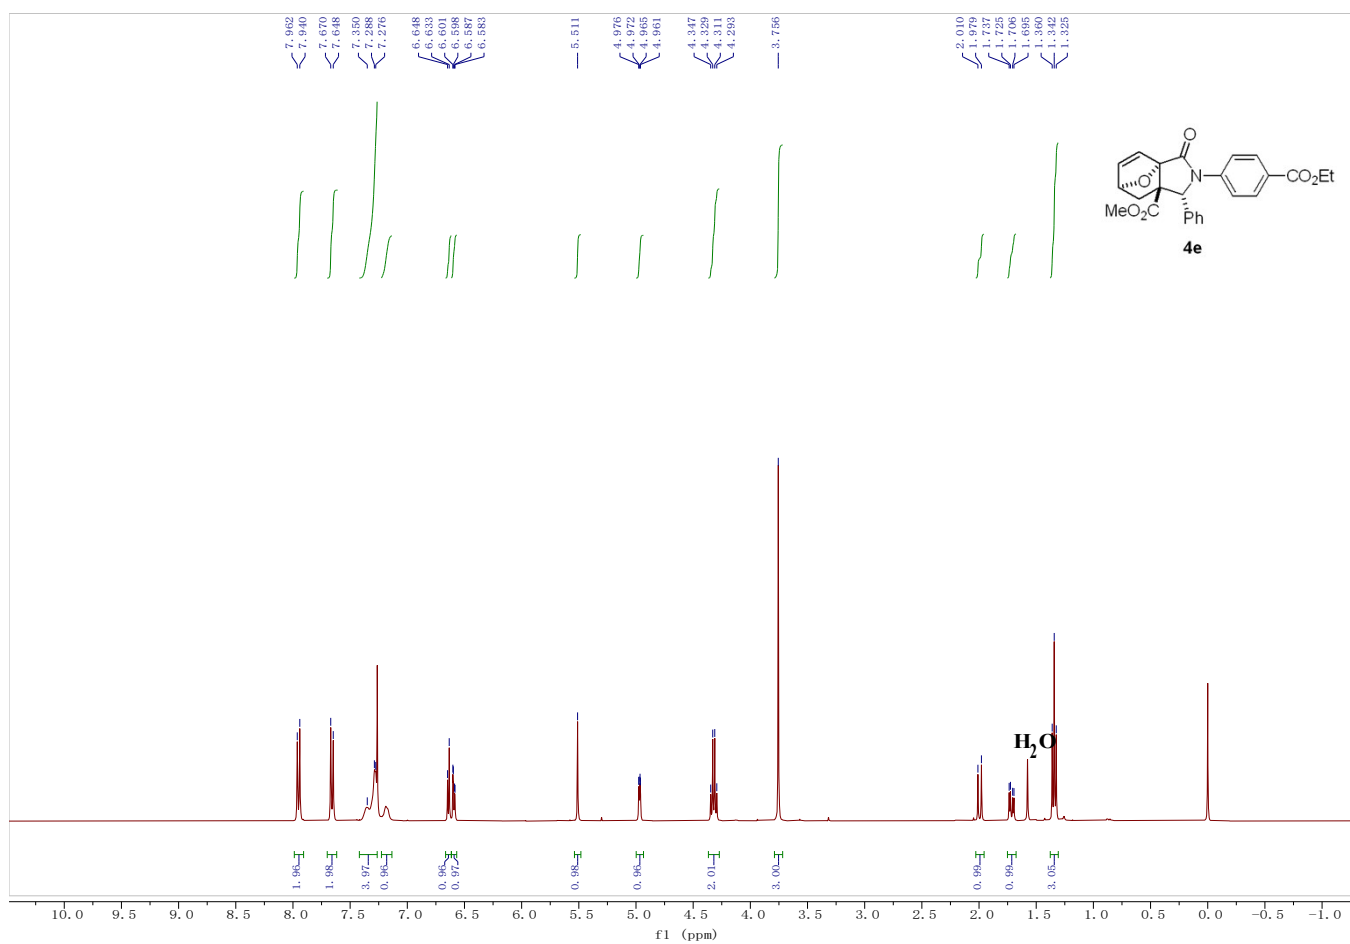

$^{13}\text{C}$  NMR (101 MHz) in  $\text{CDCl}_3$

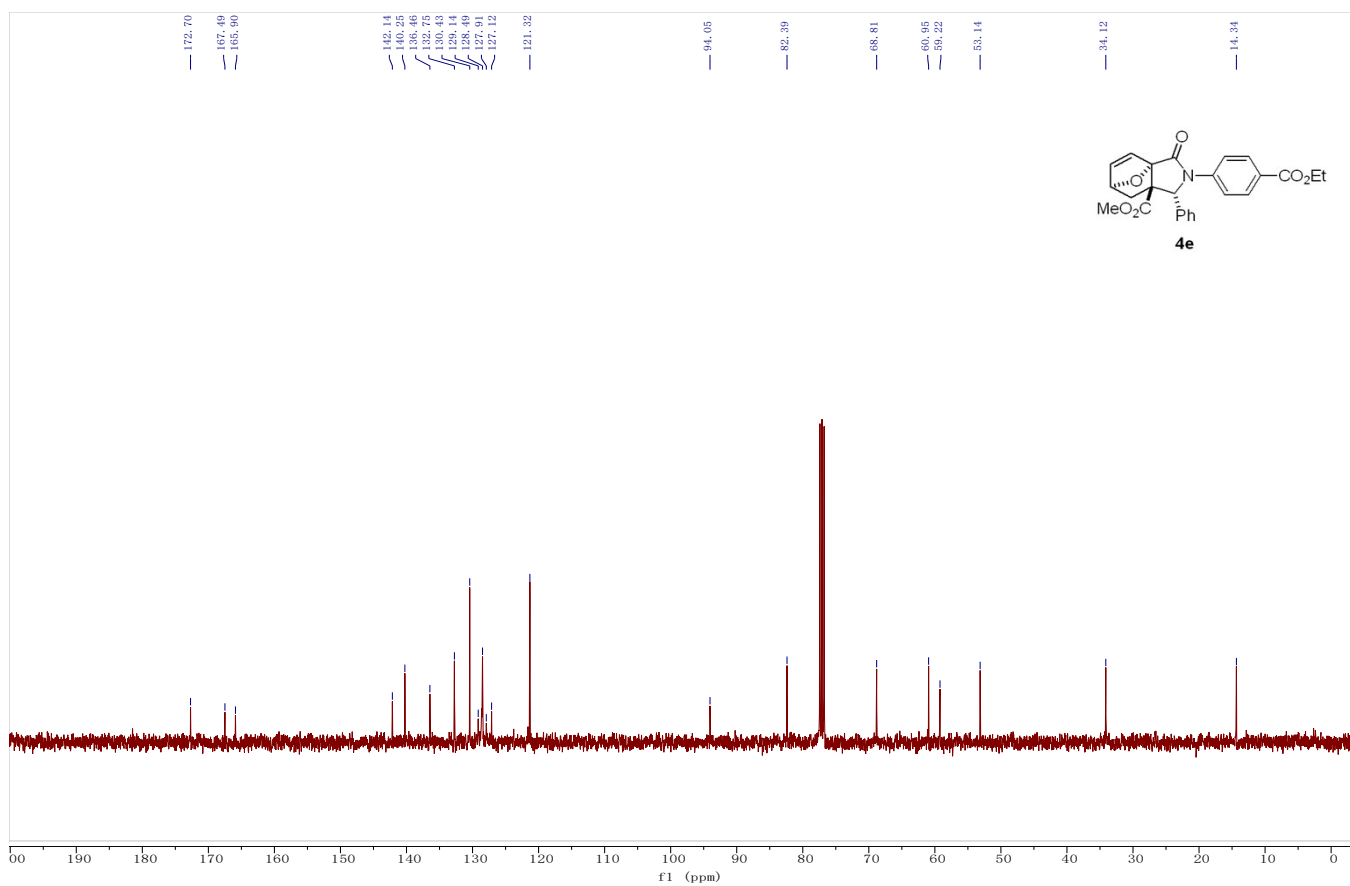

$^1\text{H}$  NMR (400 MHz) in  $\text{CDCl}_3$

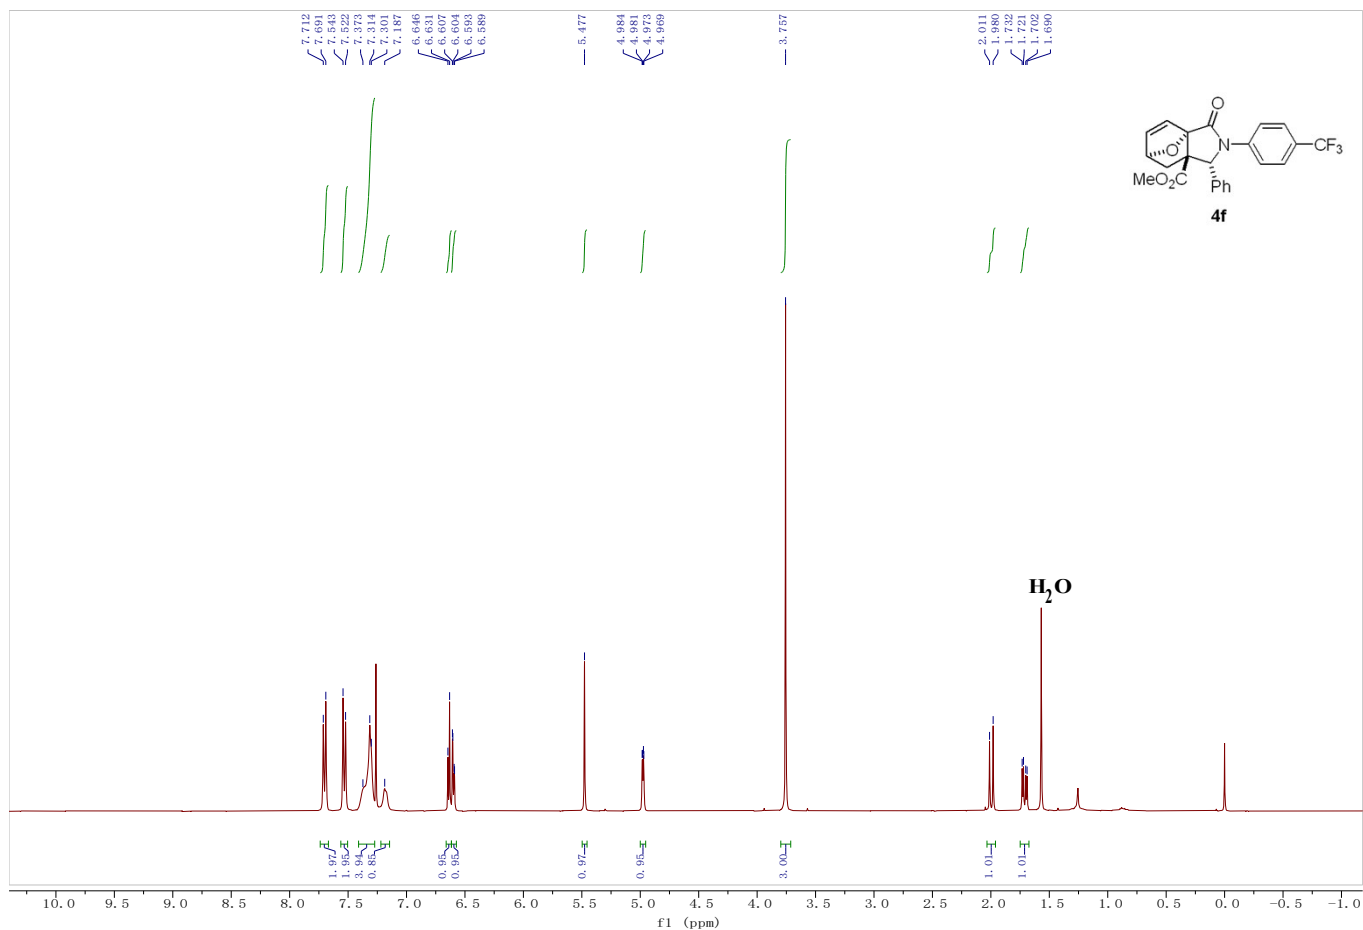

$^{13}\text{C}$  NMR (101 MHz) in  $\text{CDCl}_3$

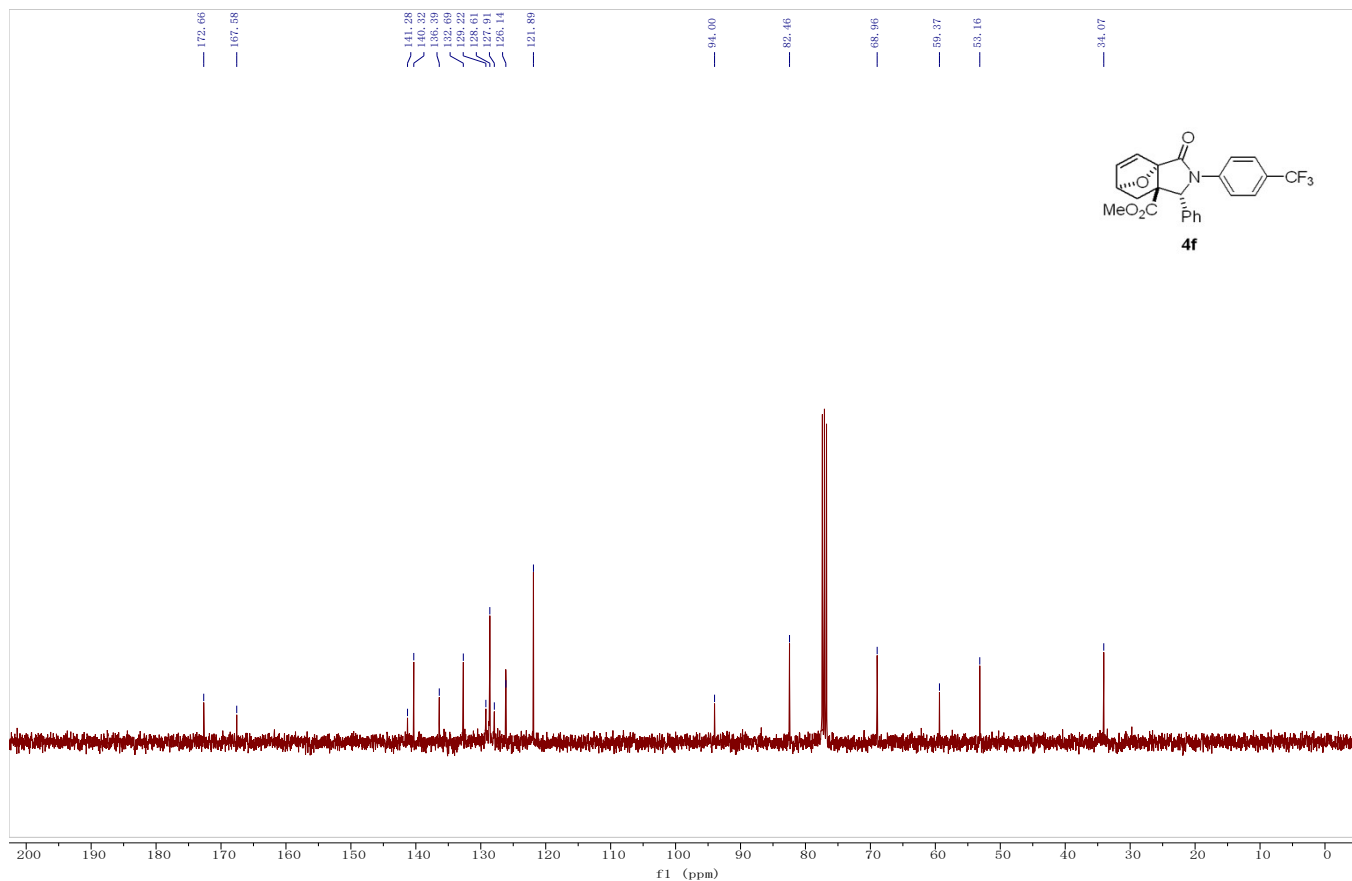

$^{19}\text{F}$  NMR (376 MHz) in  $\text{CDCl}_3$

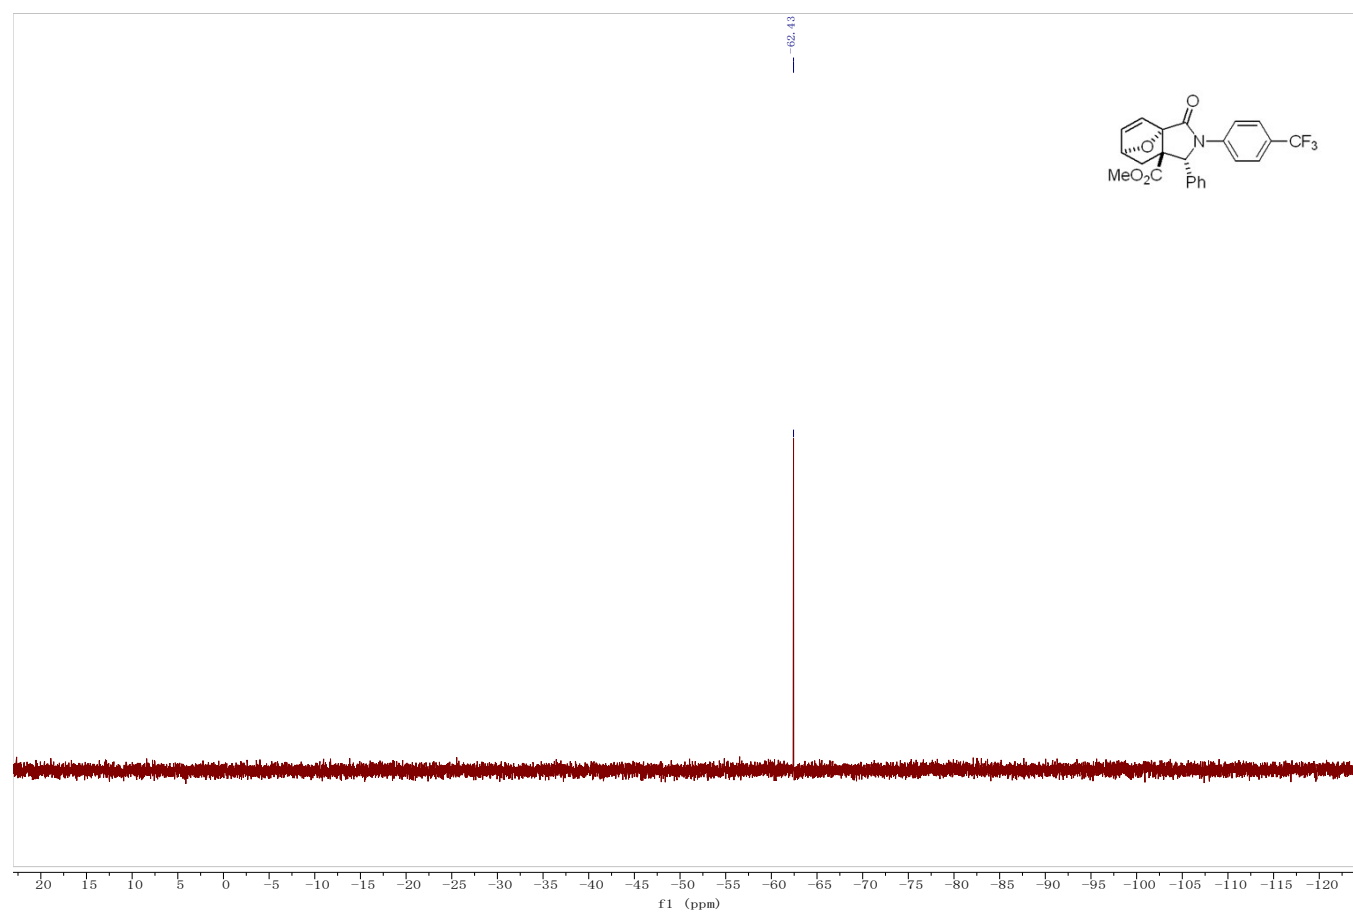

# $^1\text{H}$ NMR (400 MHz) in $\text{CDCl}_3$

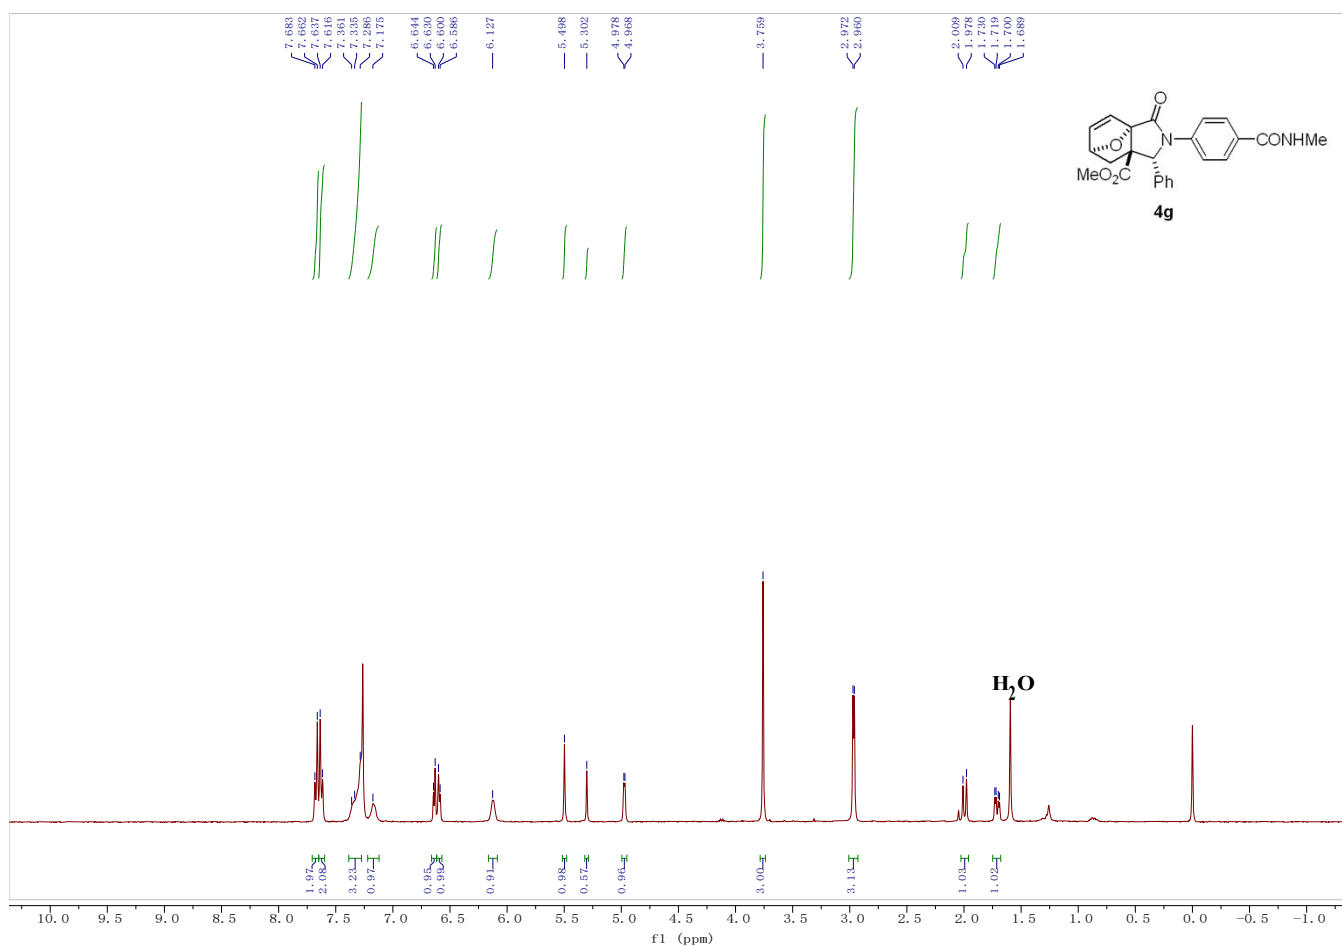

# $^{13}\text{C}$ NMR (101 MHz) in $\text{CDCl}_3$

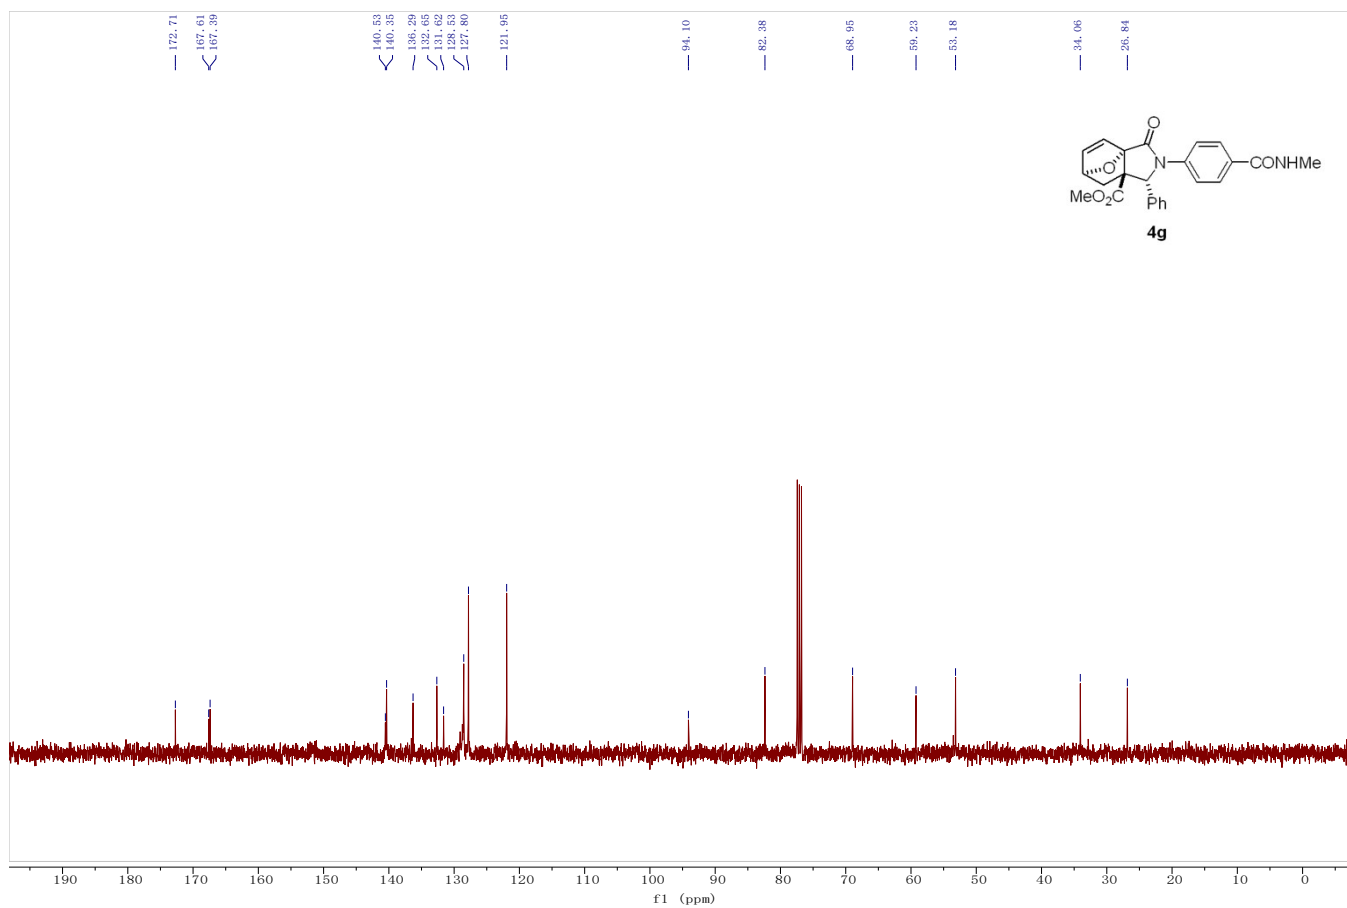

$^1\text{H}$  NMR (400 MHz) in  $\text{CDCl}_3$

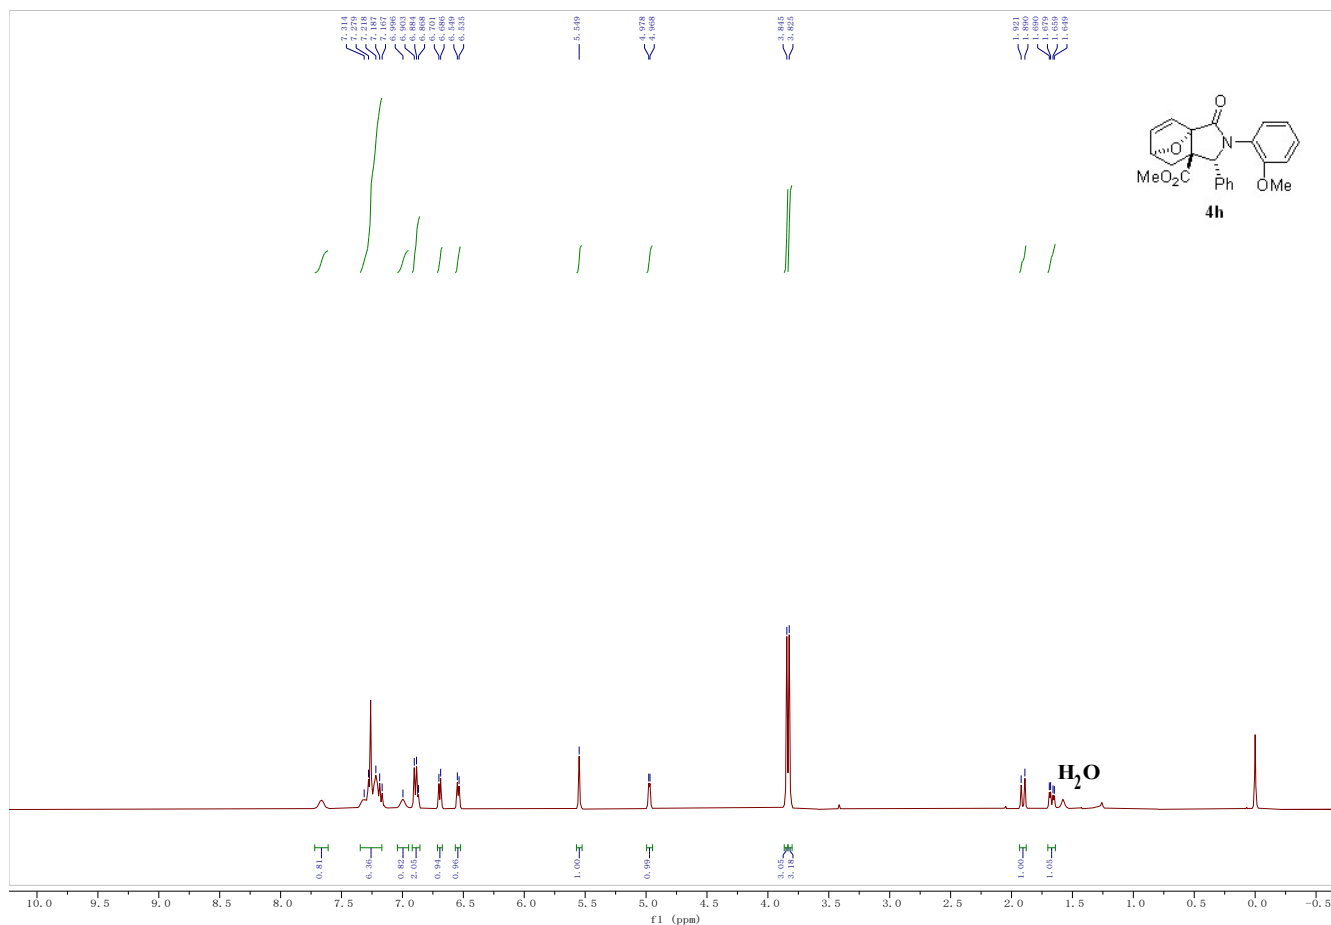

$^{13}\text{C}$  NMR (101 MHz) in  $\text{CDCl}_3$

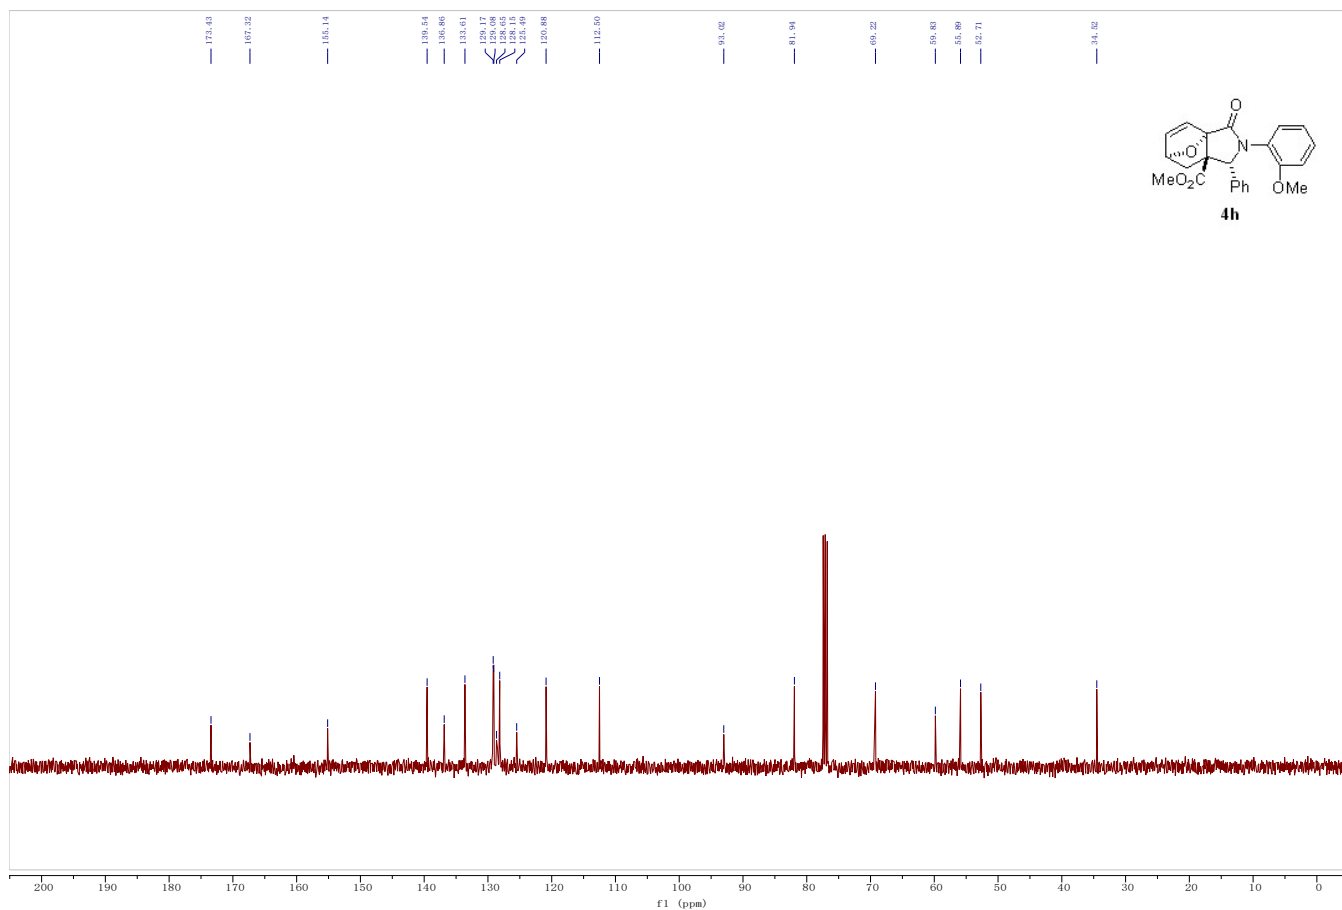

$^1\text{H}$  NMR (400 MHz) in  $\text{CDCl}_3$

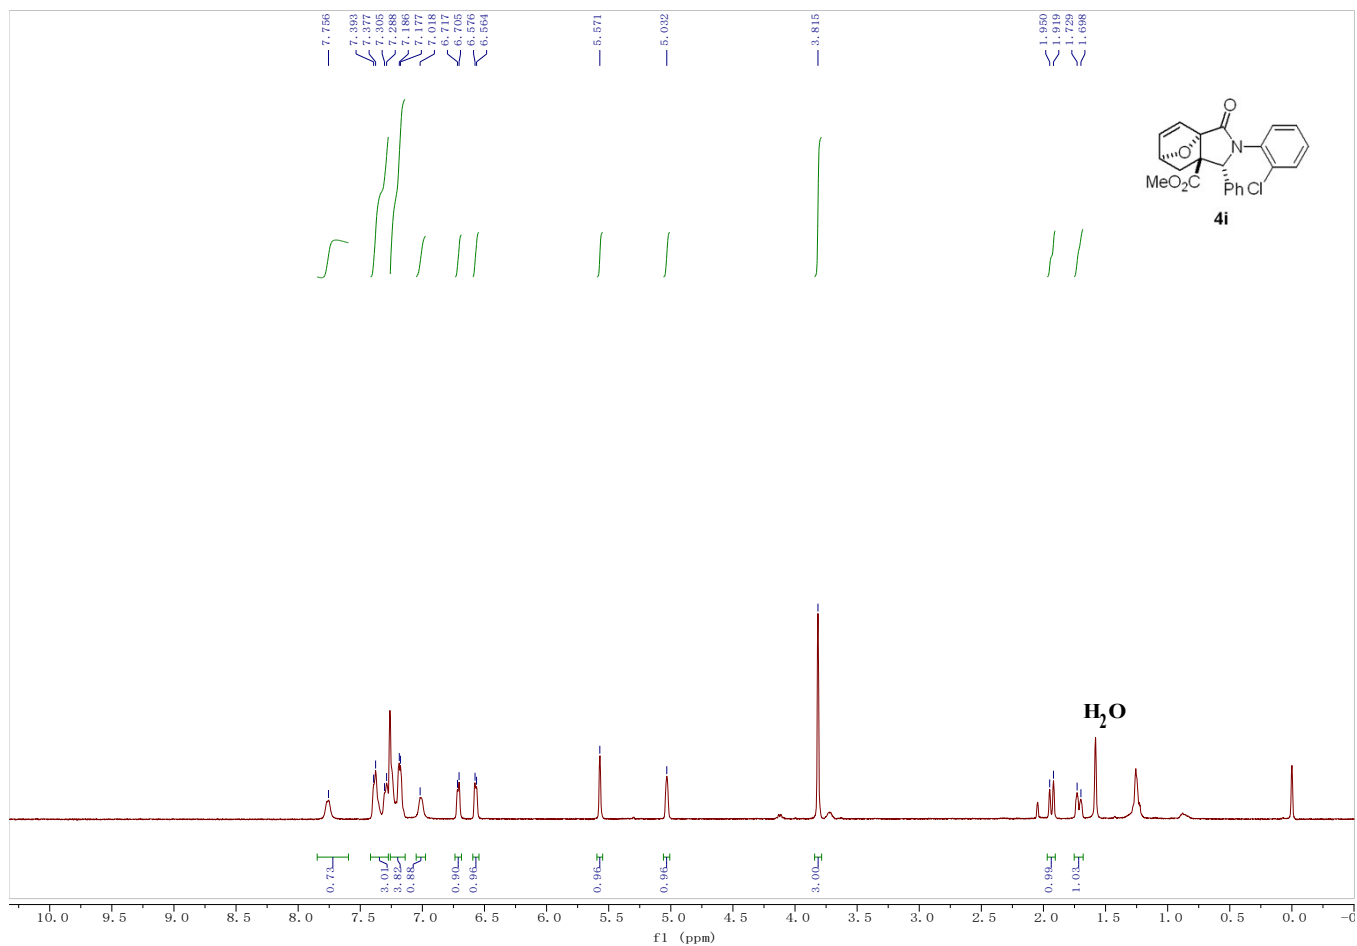

$^{13}\text{C}$  NMR (101 MHz) in  $\text{CDCl}_3$

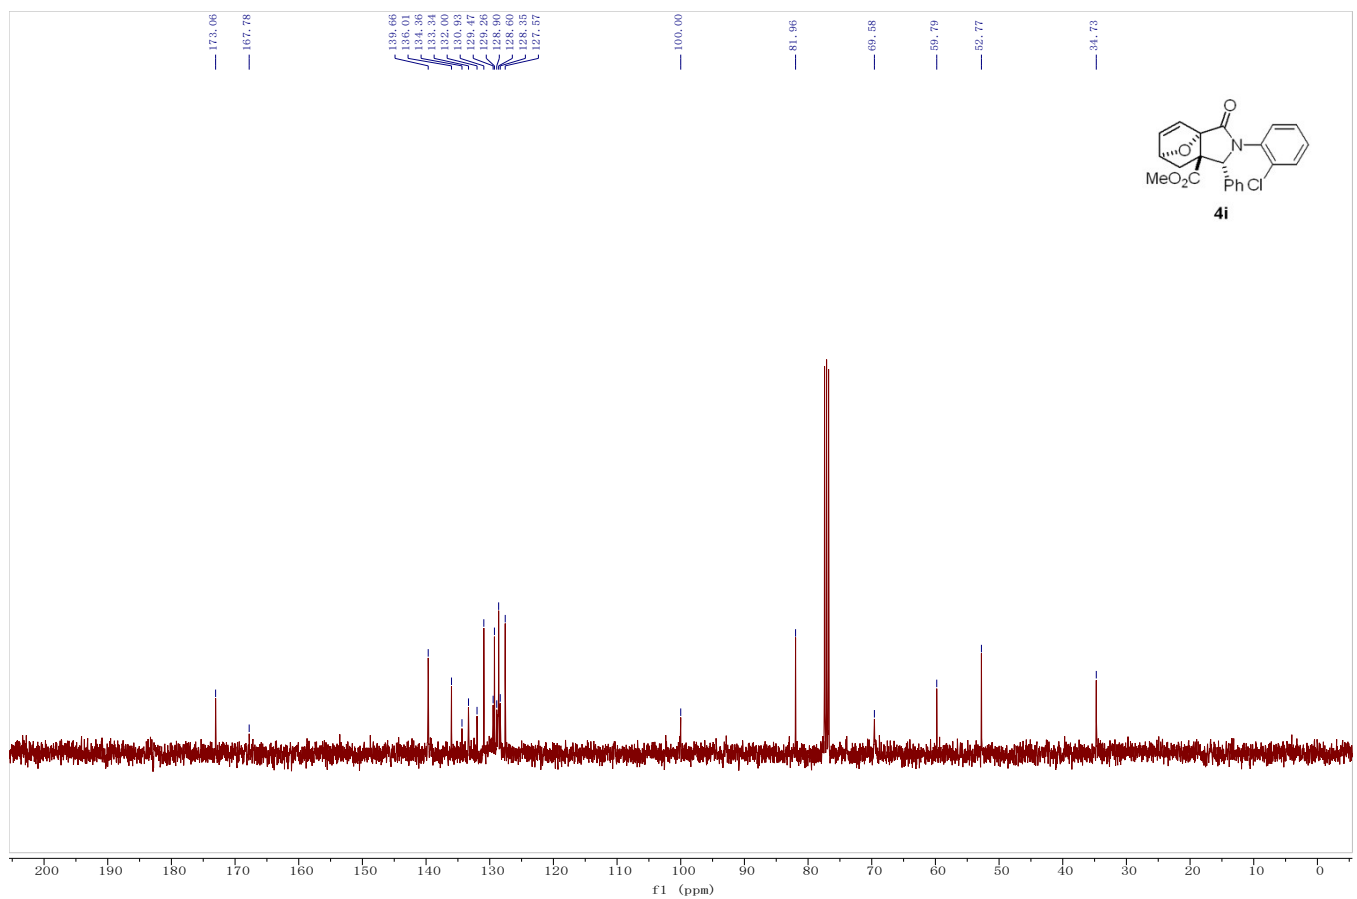

$^1\text{H}$  NMR (400 MHz) in  $\text{CDCl}_3$

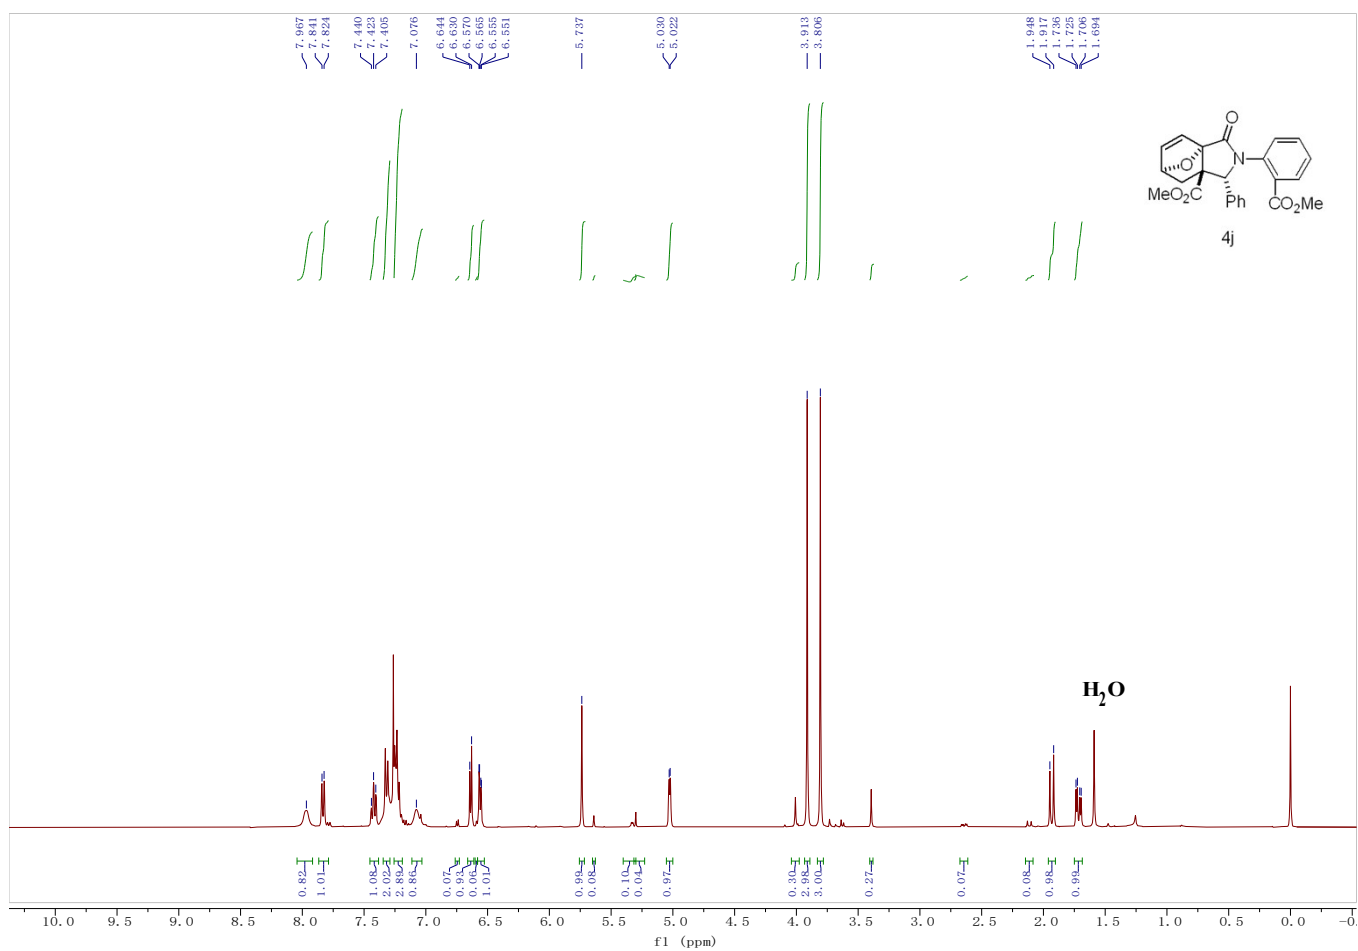

$^{13}\text{C}$  NMR (101 MHz) in  $\text{CDCl}_3$

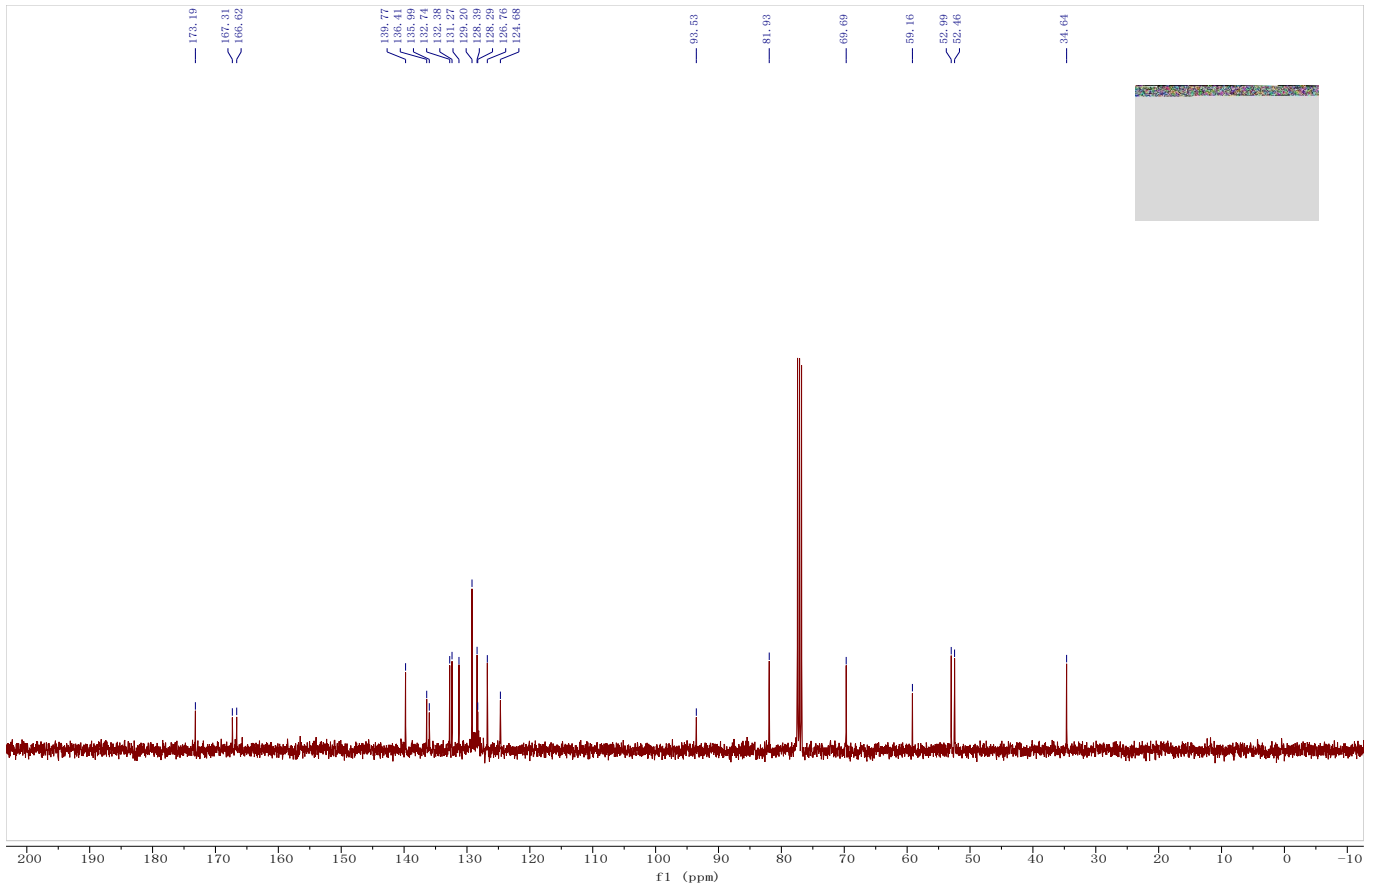

$^1\text{H}$  NMR (400 MHz) in  $\text{CDCl}_3$

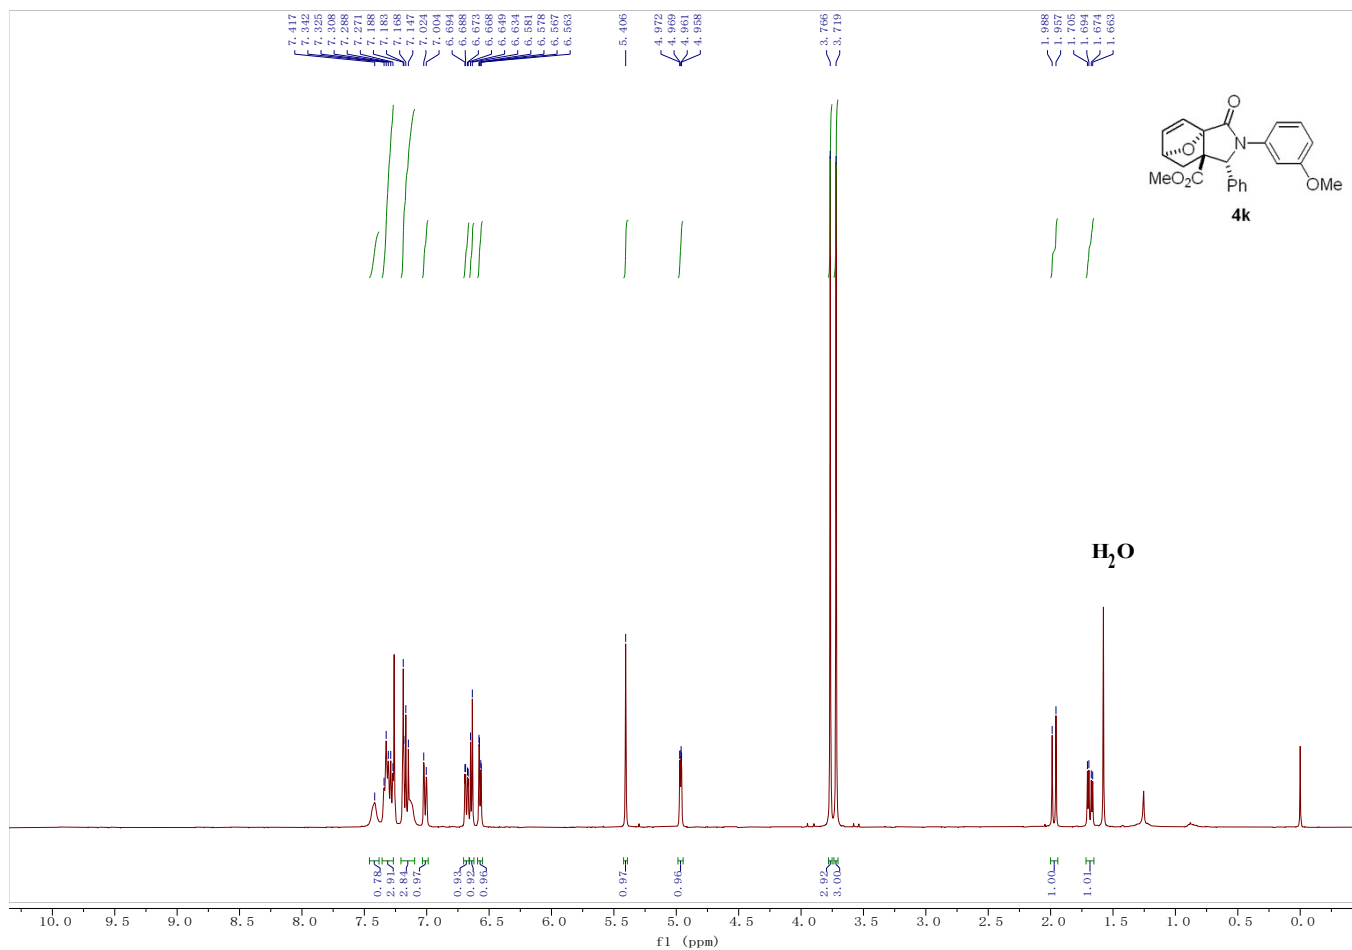

$^{13}\text{C}$  NMR (101 MHz) in  $\text{CDCl}_3$

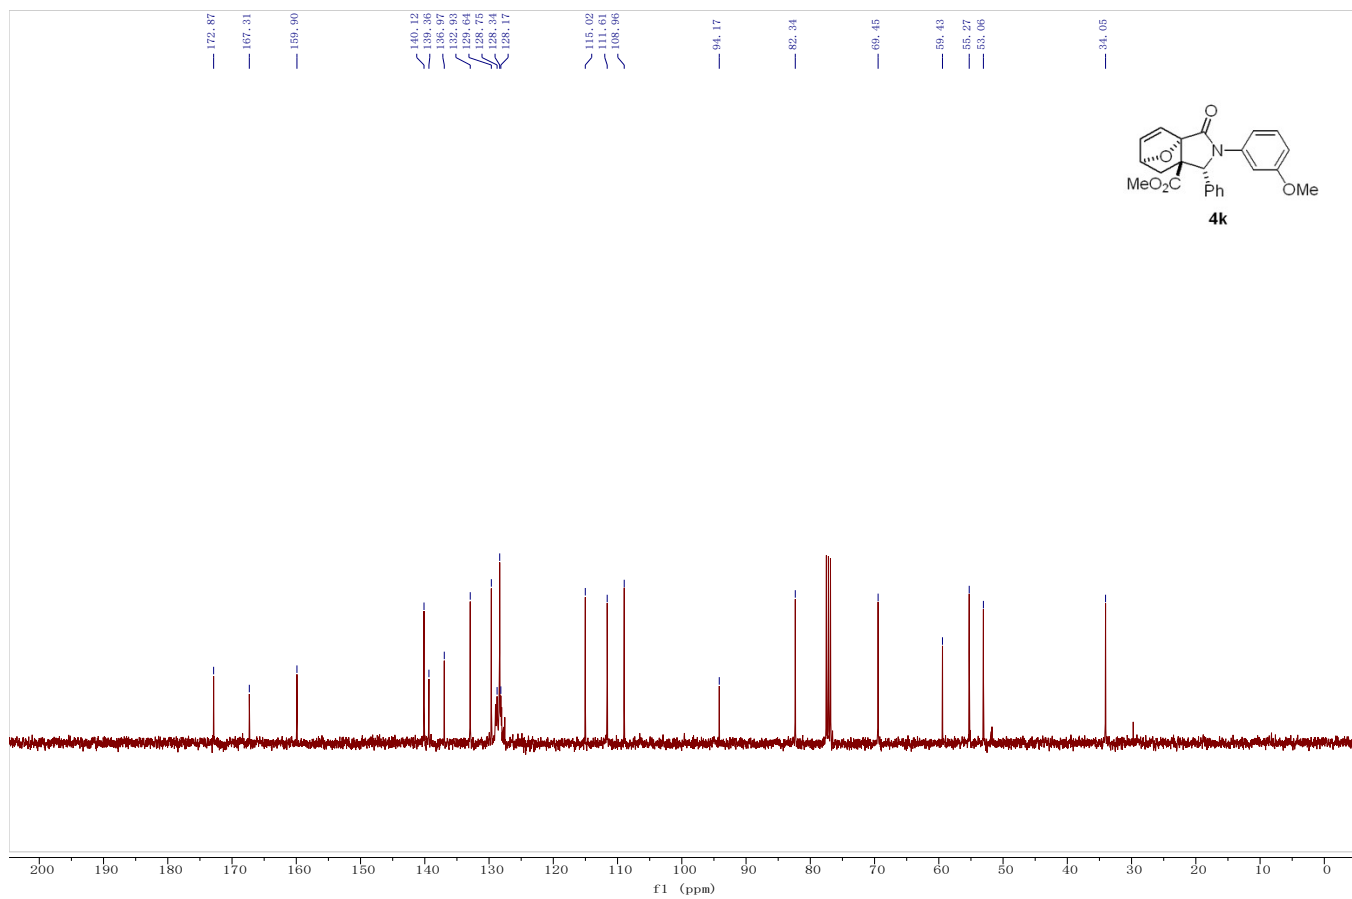

# $^1\text{H}$ NMR (400 MHz) in $\text{CDCl}_3$

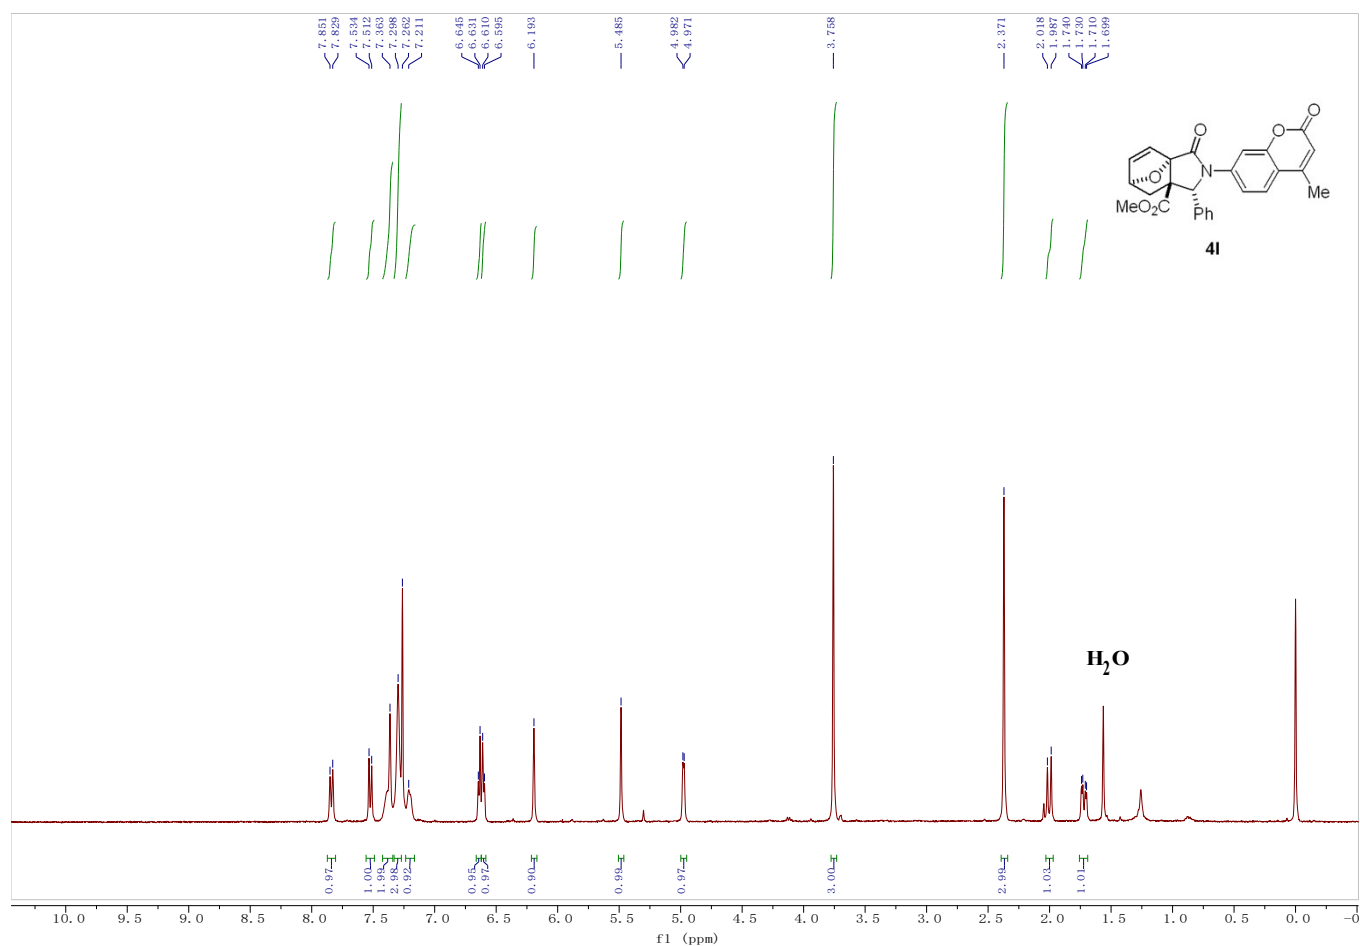

# $^{13}\text{C}$ NMR (101 MHz) in $\text{CDCl}_3$

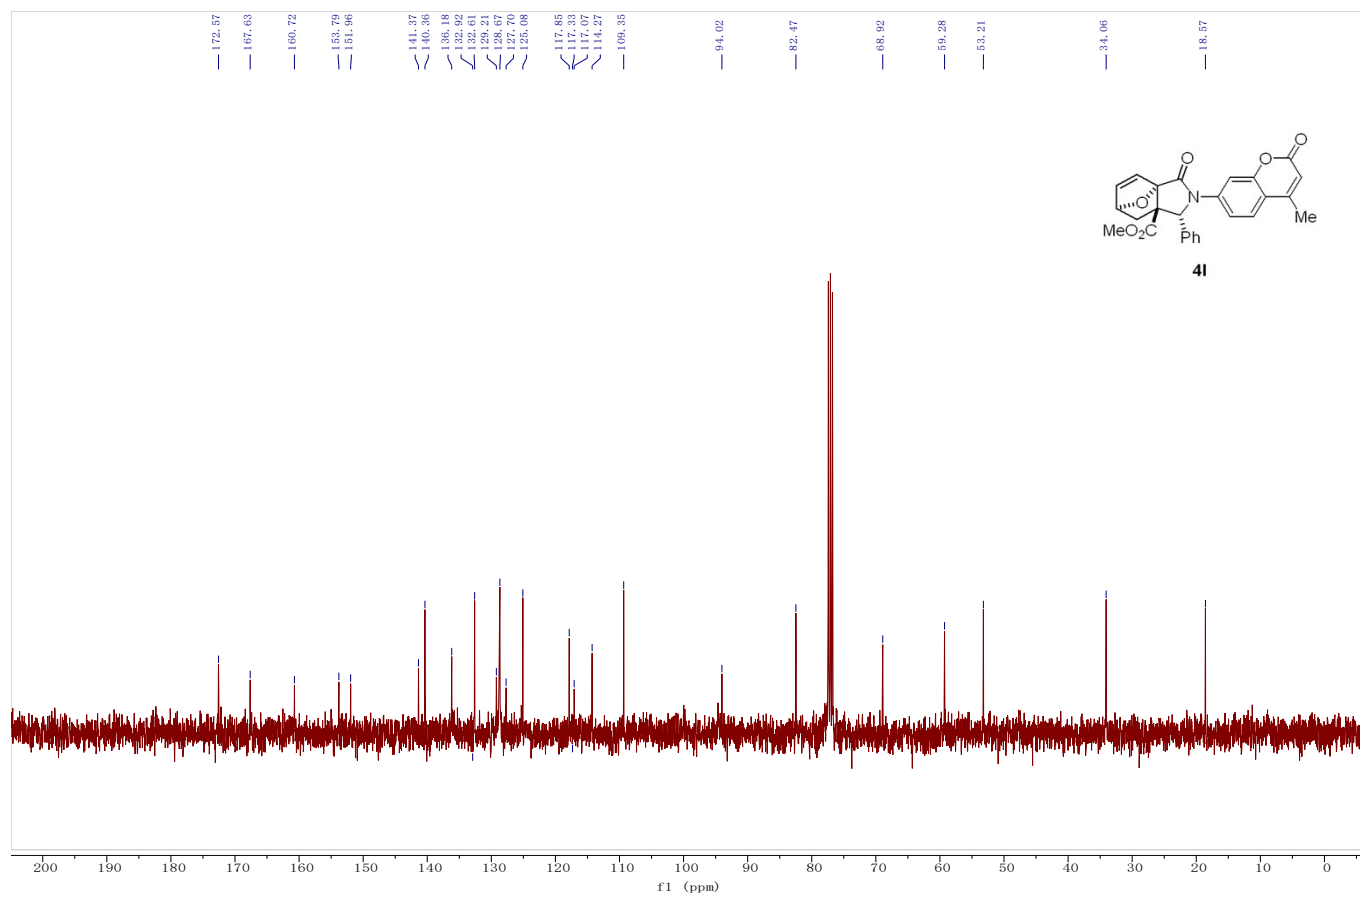

$^1\text{H}$  NMR (400 MHz) in  $\text{CDCl}_3$

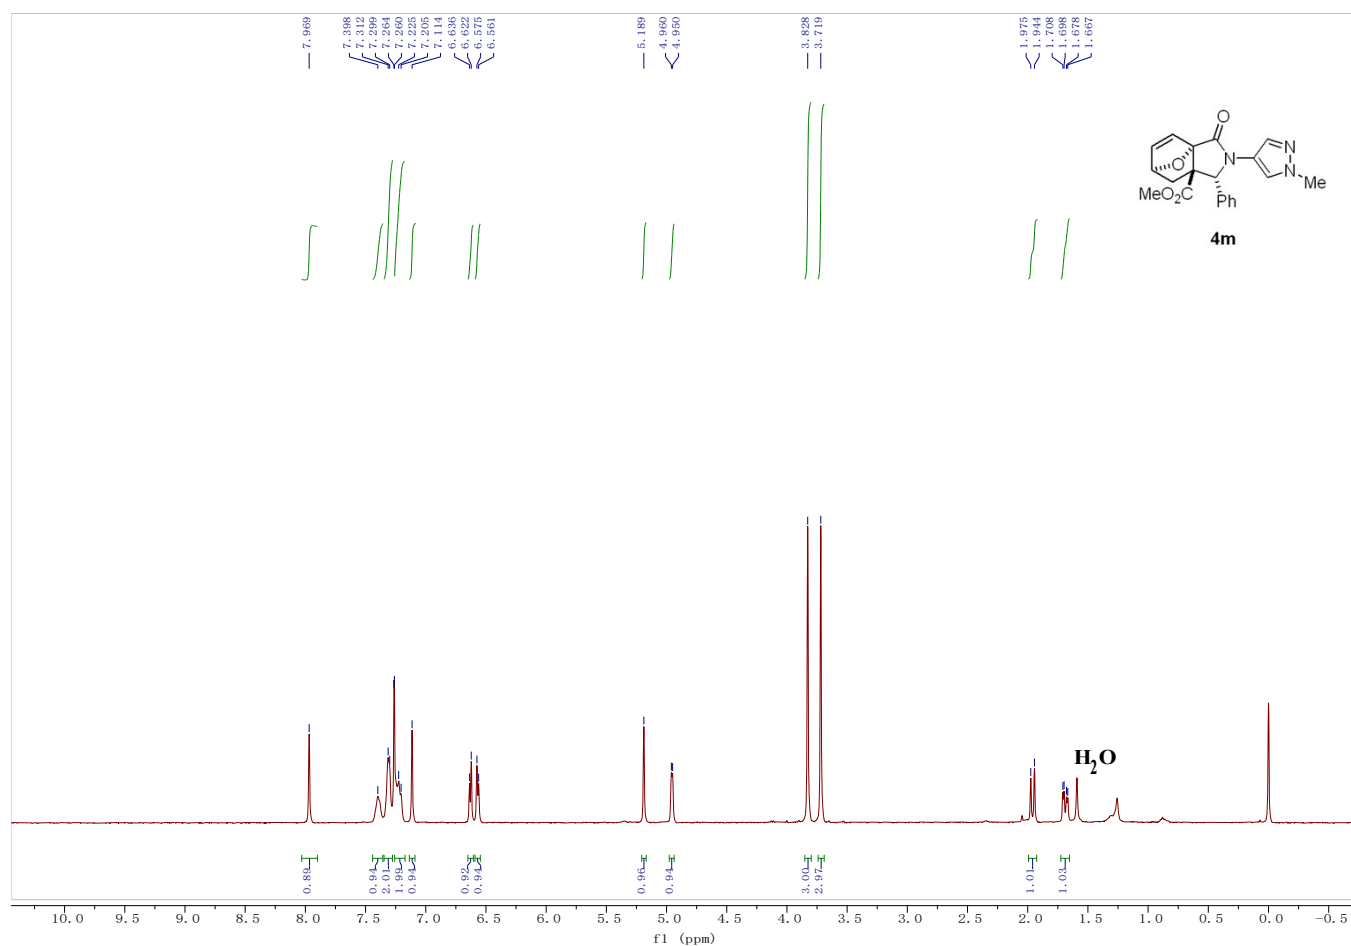

$^{13}\text{C}$  NMR (101 MHz) in  $\text{CDCl}_3$

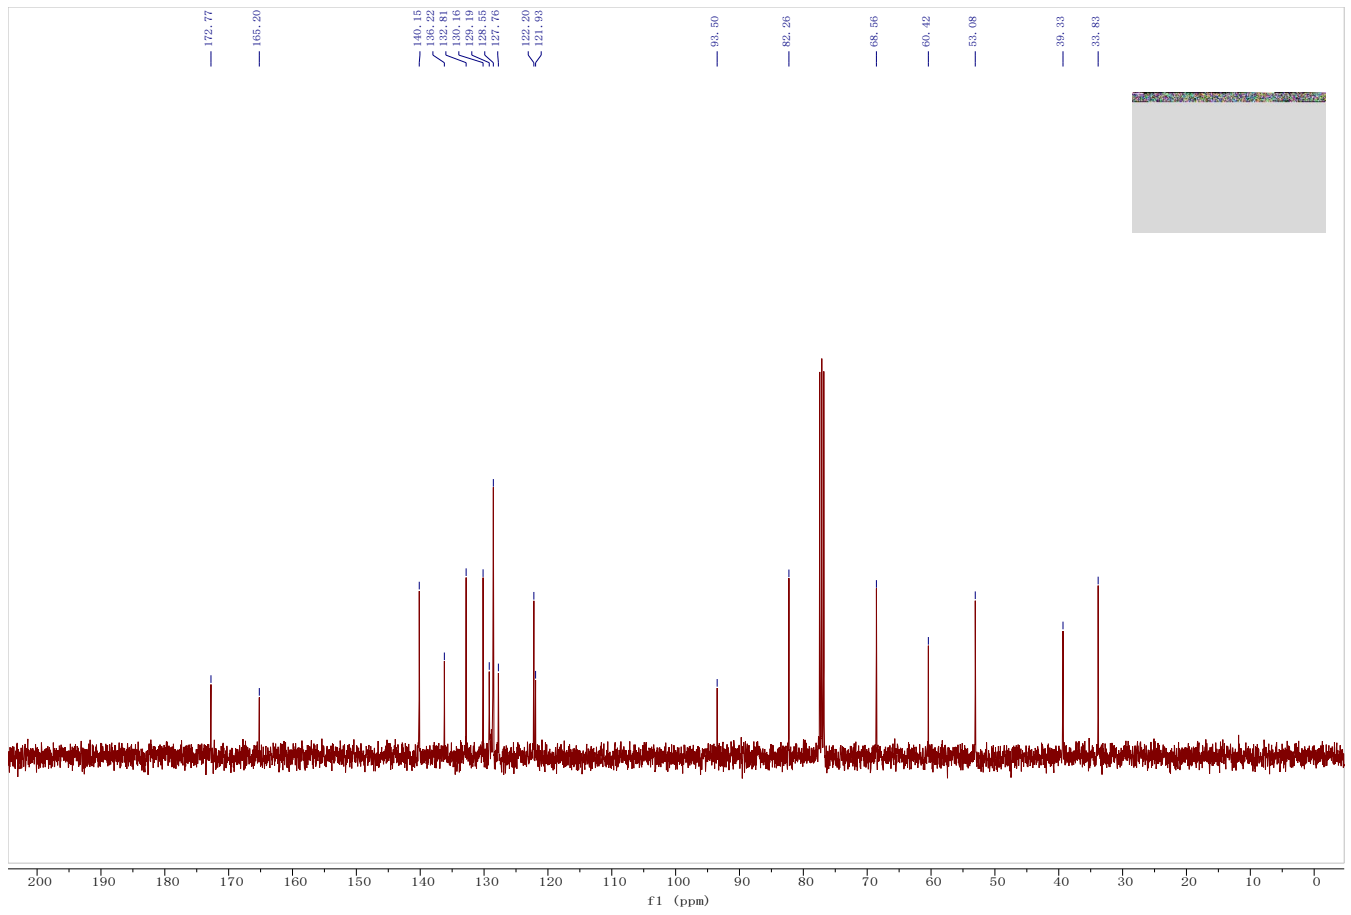

$^1\text{H}$  NMR (400 MHz) in  $\text{CDCl}_3$

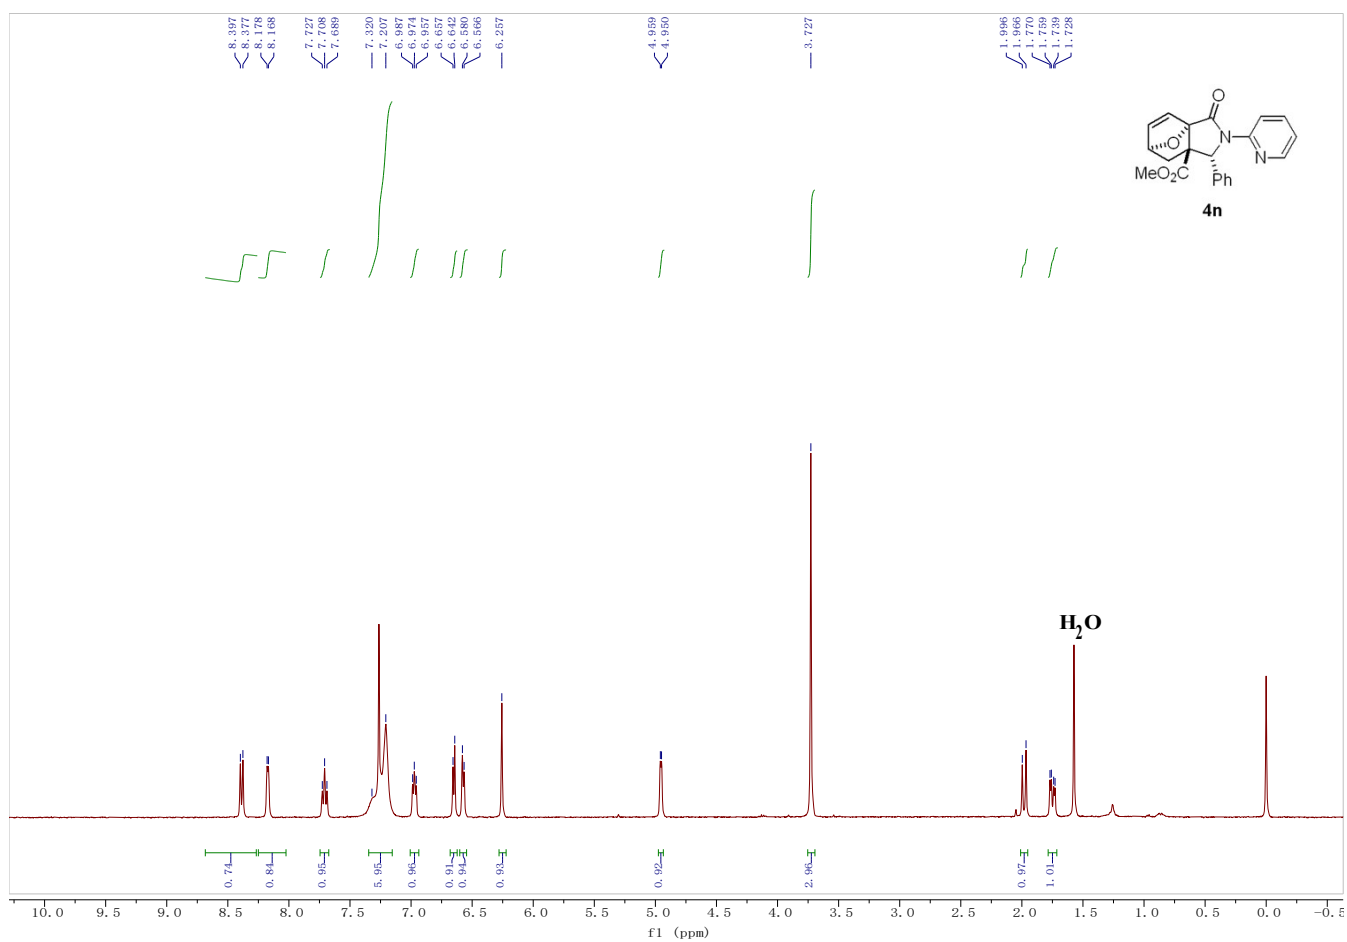

$^{13}\text{C}$  NMR (101 MHz) in  $\text{CDCl}_3$

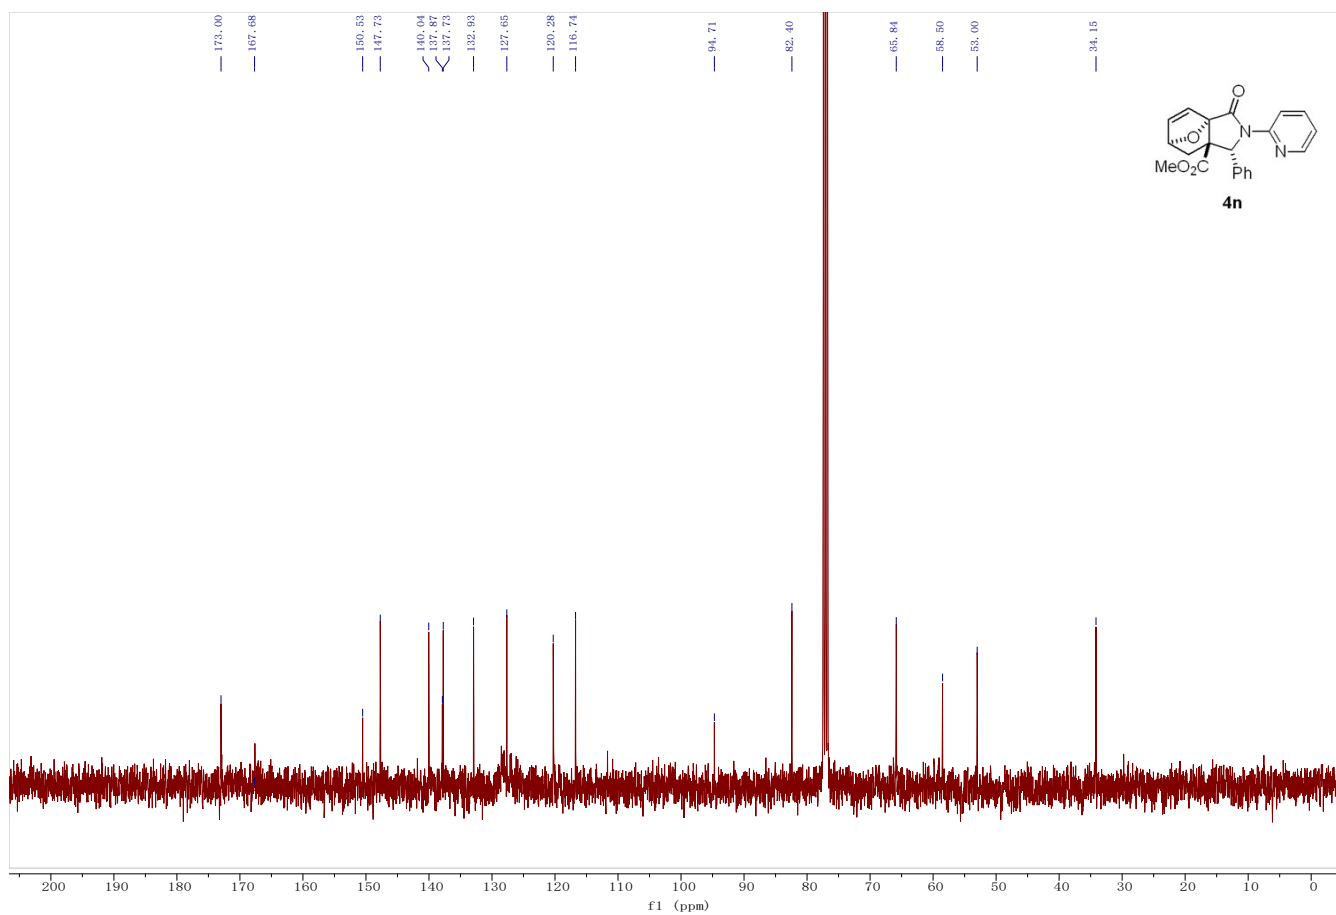

$^1\text{H}$  NMR (400 MHz) in  $\text{CDCl}_3$

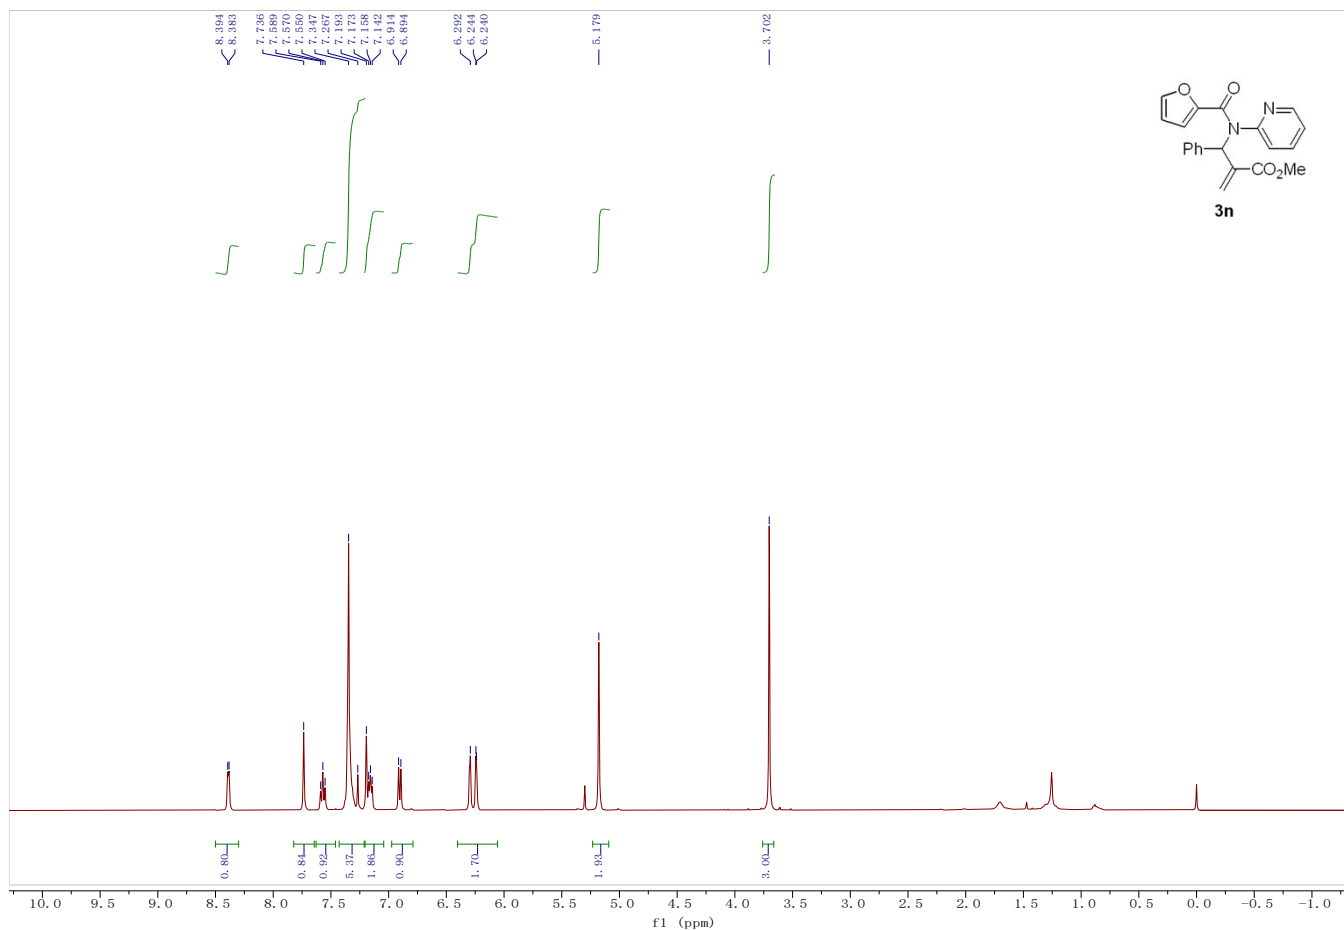

$^{13}\text{C}$  NMR (101 MHz) in  $\text{CDCl}_3$

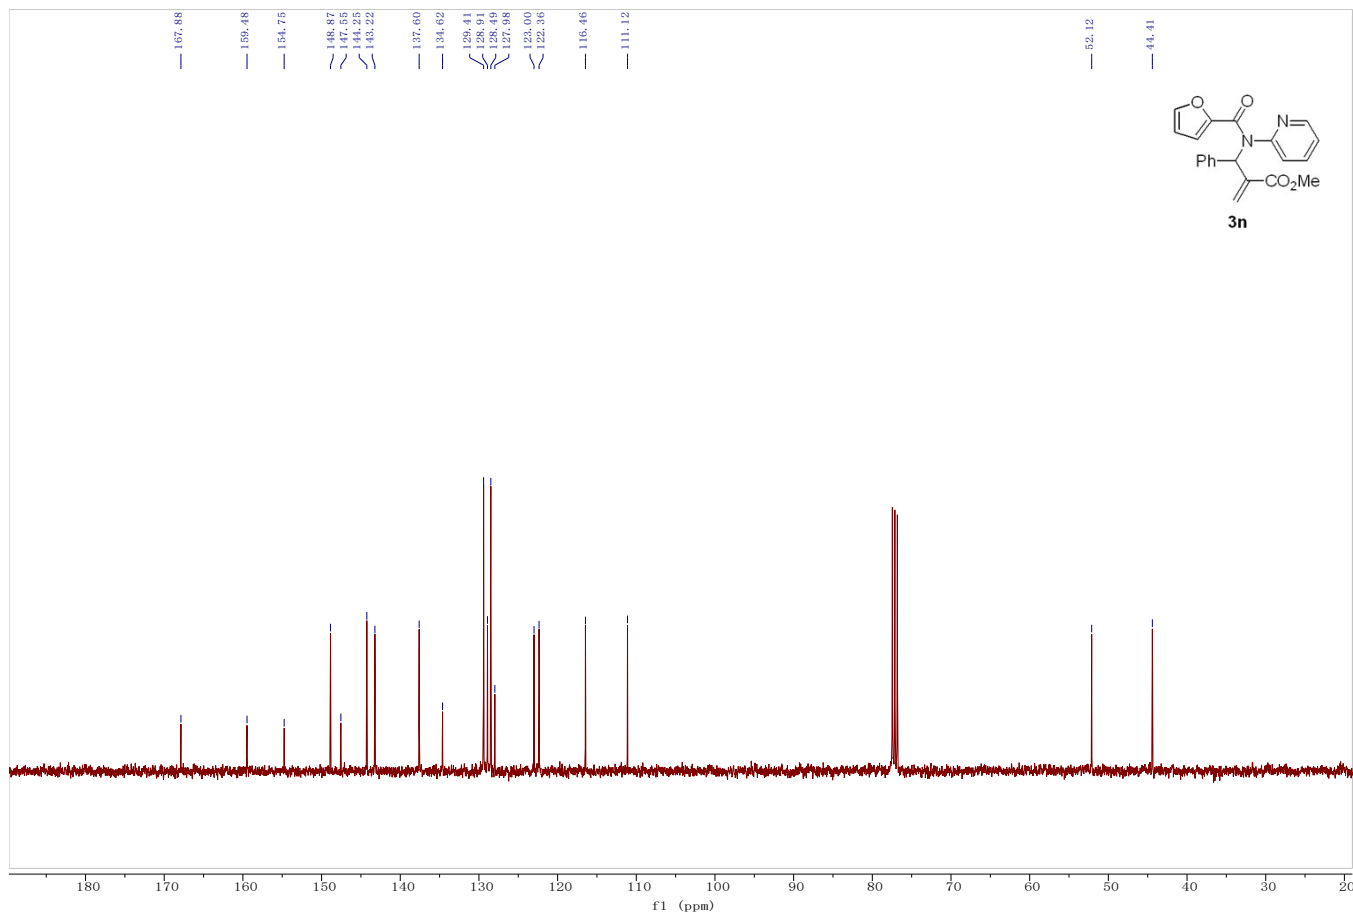

$^1\text{H}$  NMR (400 MHz) in  $\text{CDCl}_3$

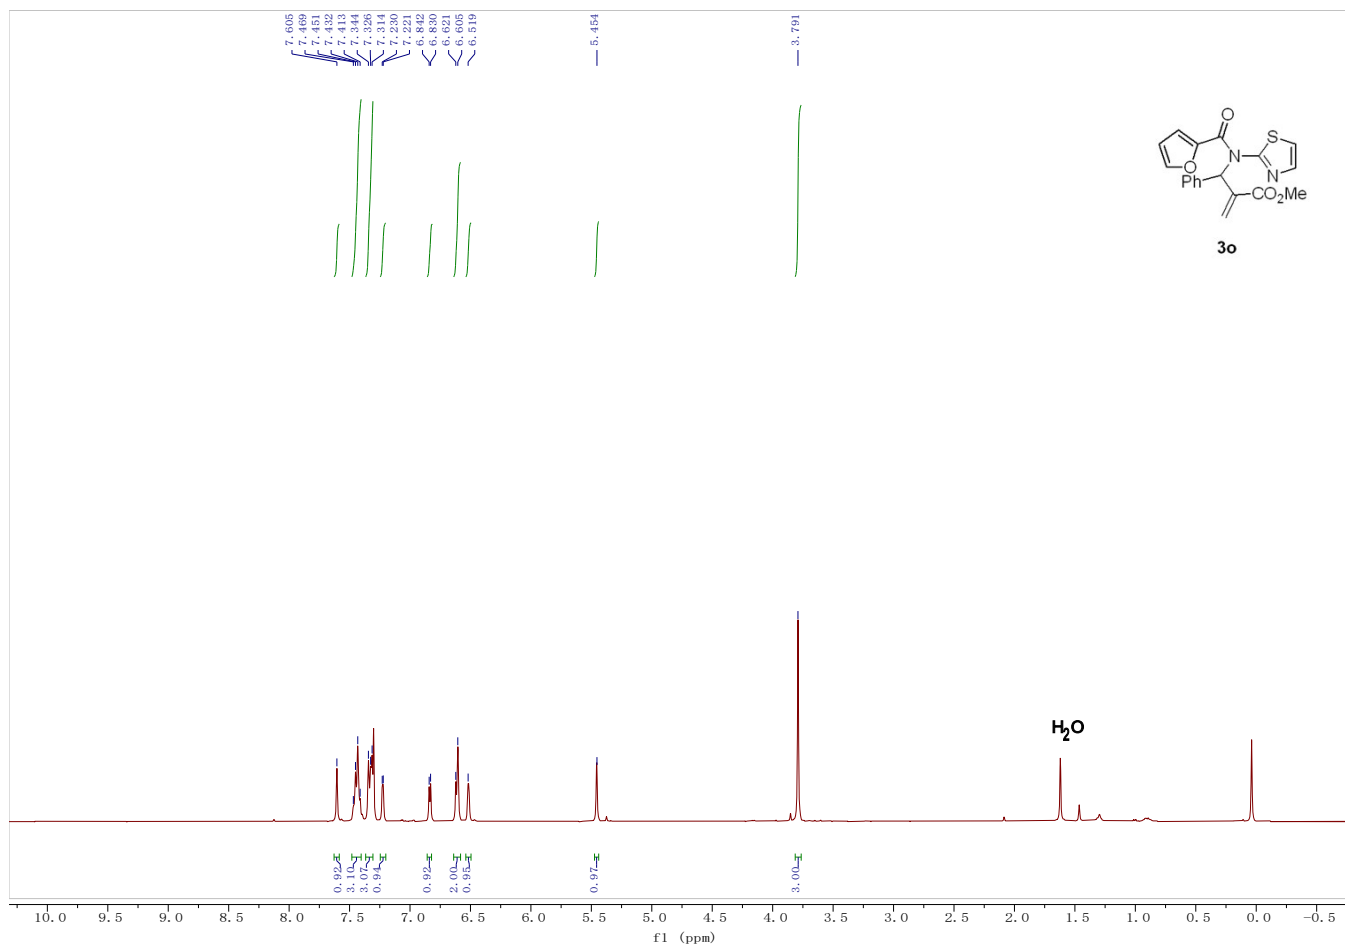

$^{13}\text{C}$  NMR (101 MHz) in  $\text{CDCl}_3$

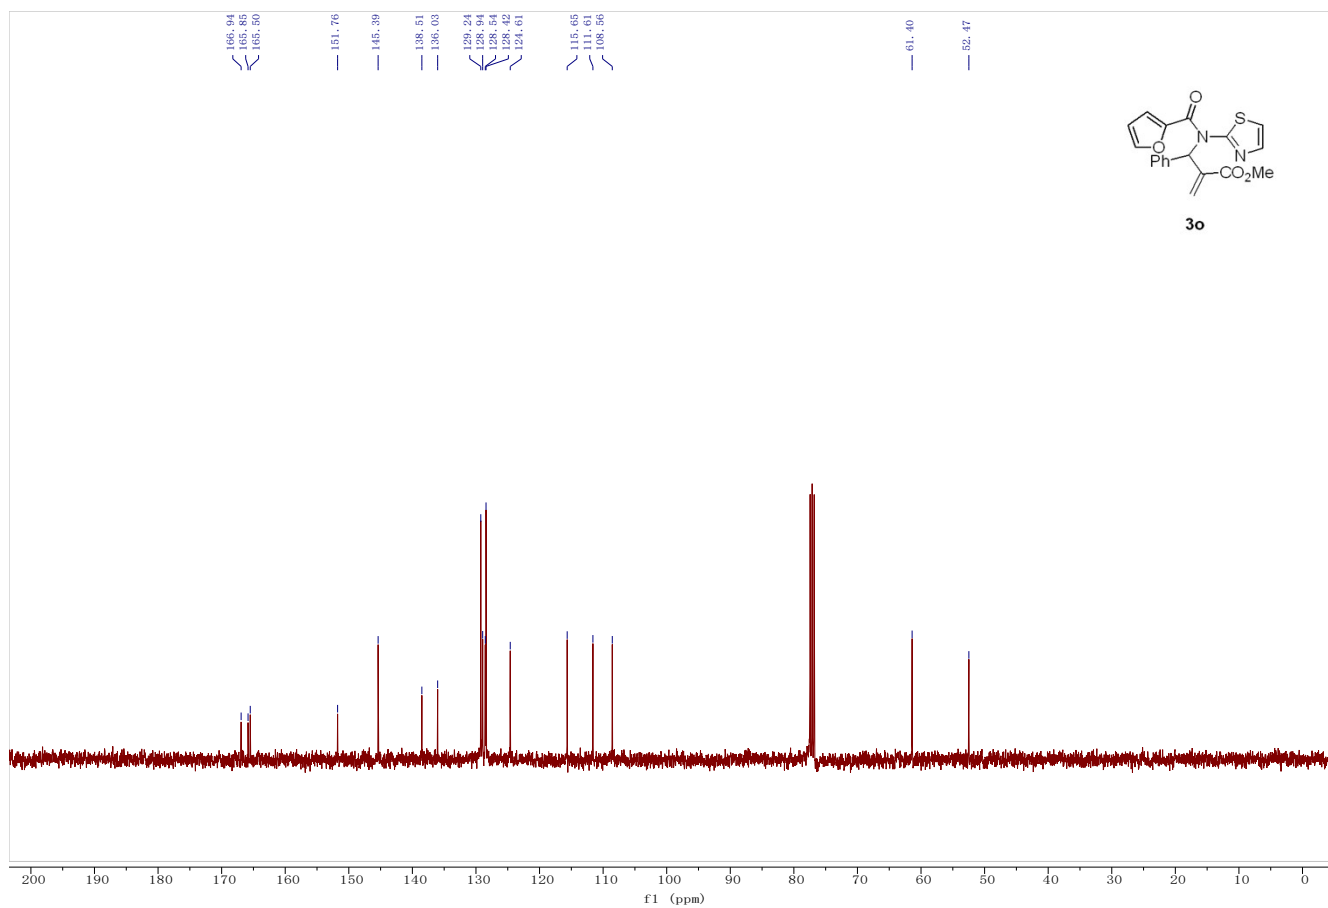

$^1\text{H}$  NMR (400 MHz) in  $\text{CDCl}_3$

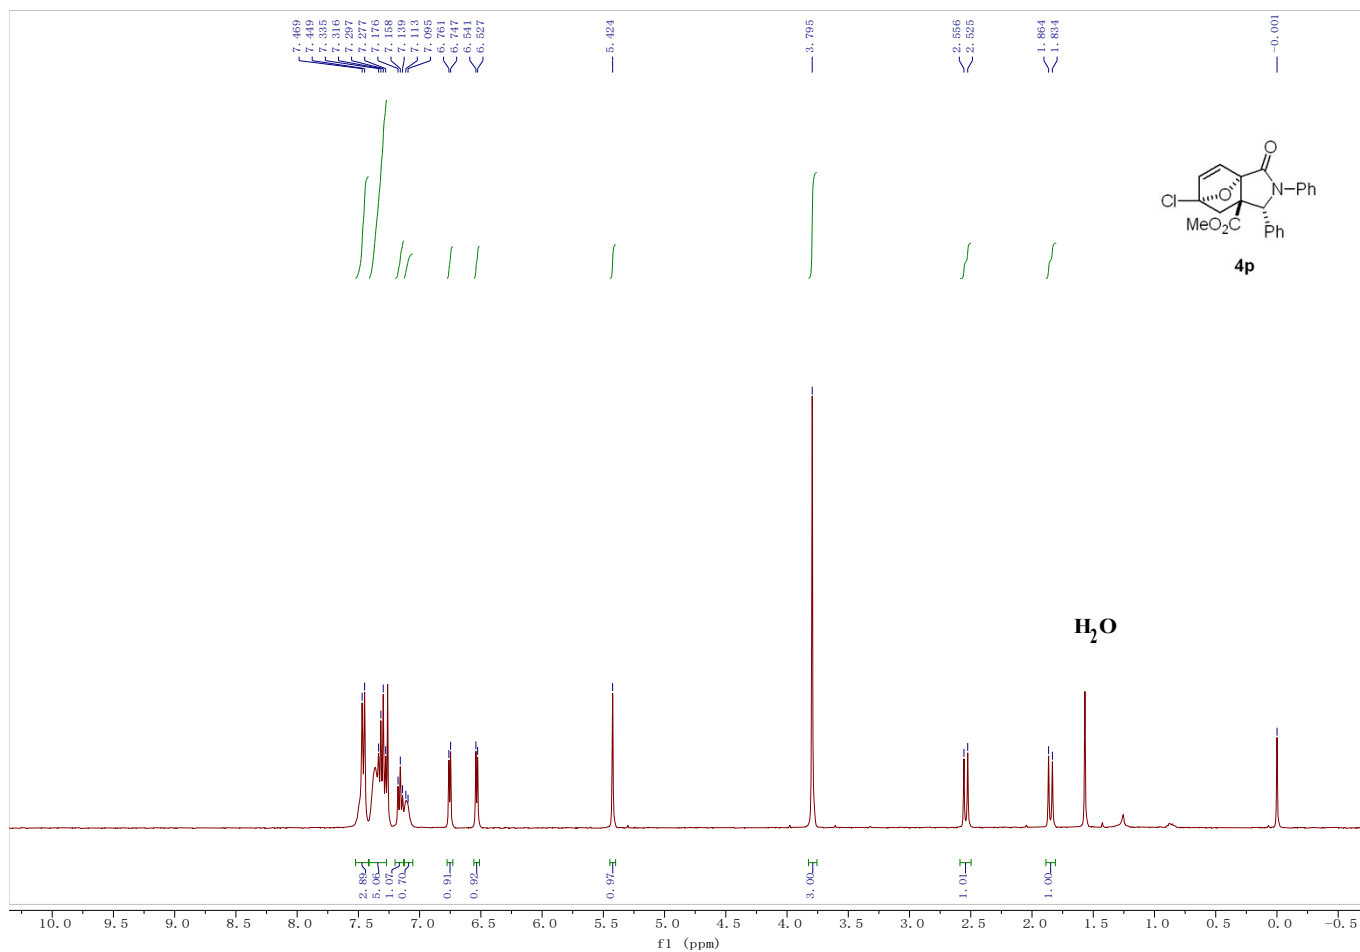

$^{13}\text{C}$  NMR (101 MHz) in  $\text{CDCl}_3$

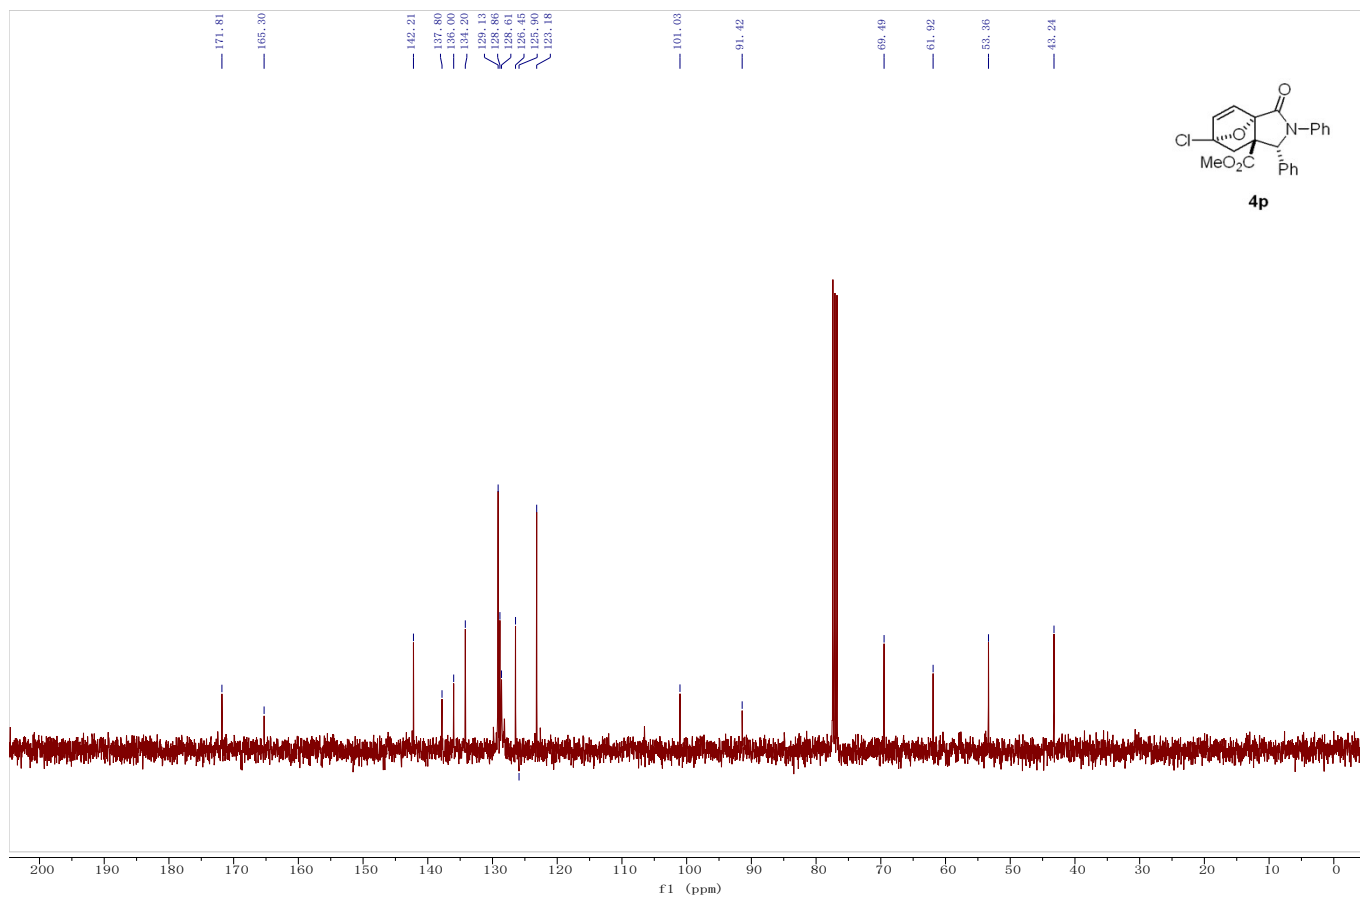

$^1\text{H}$  NMR (400 MHz) in  $\text{CDCl}_3$

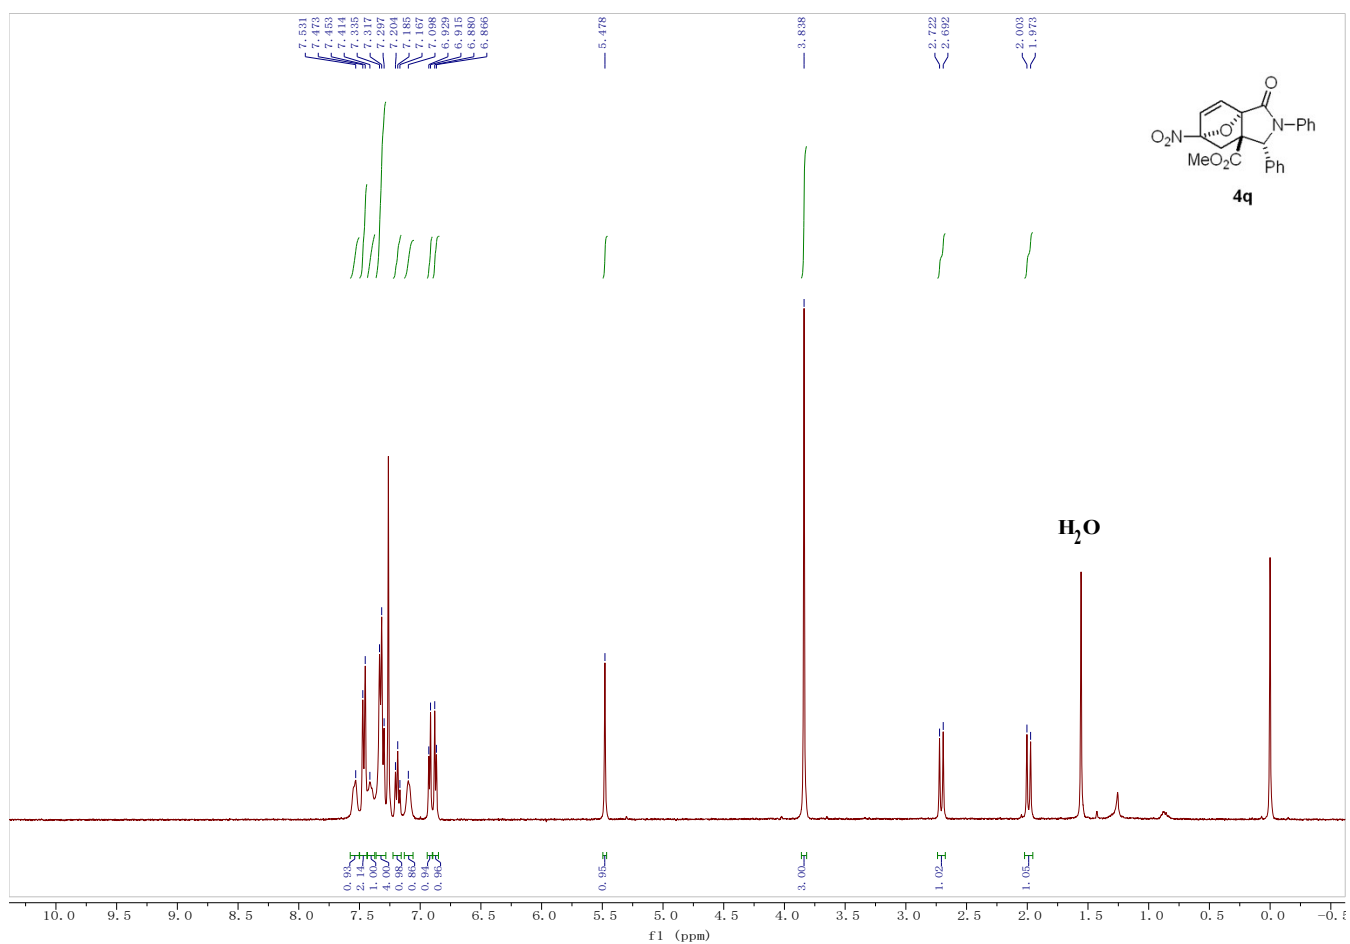

$^{13}\text{C}$  NMR (101 MHz) in  $\text{CDCl}_3$

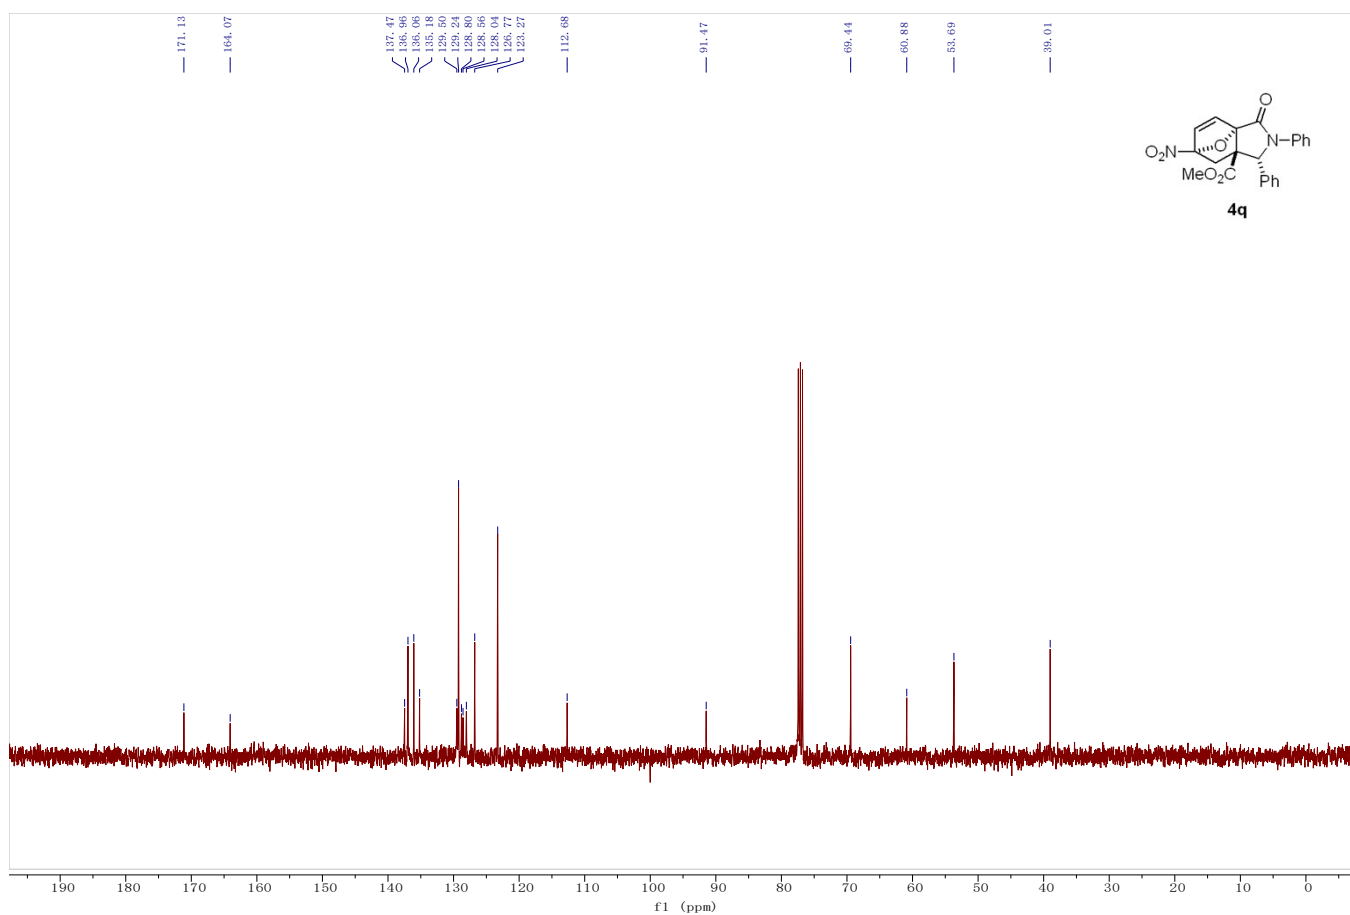

<sup>1</sup>H NMR (400 MHz) in CDCl<sub>3</sub>

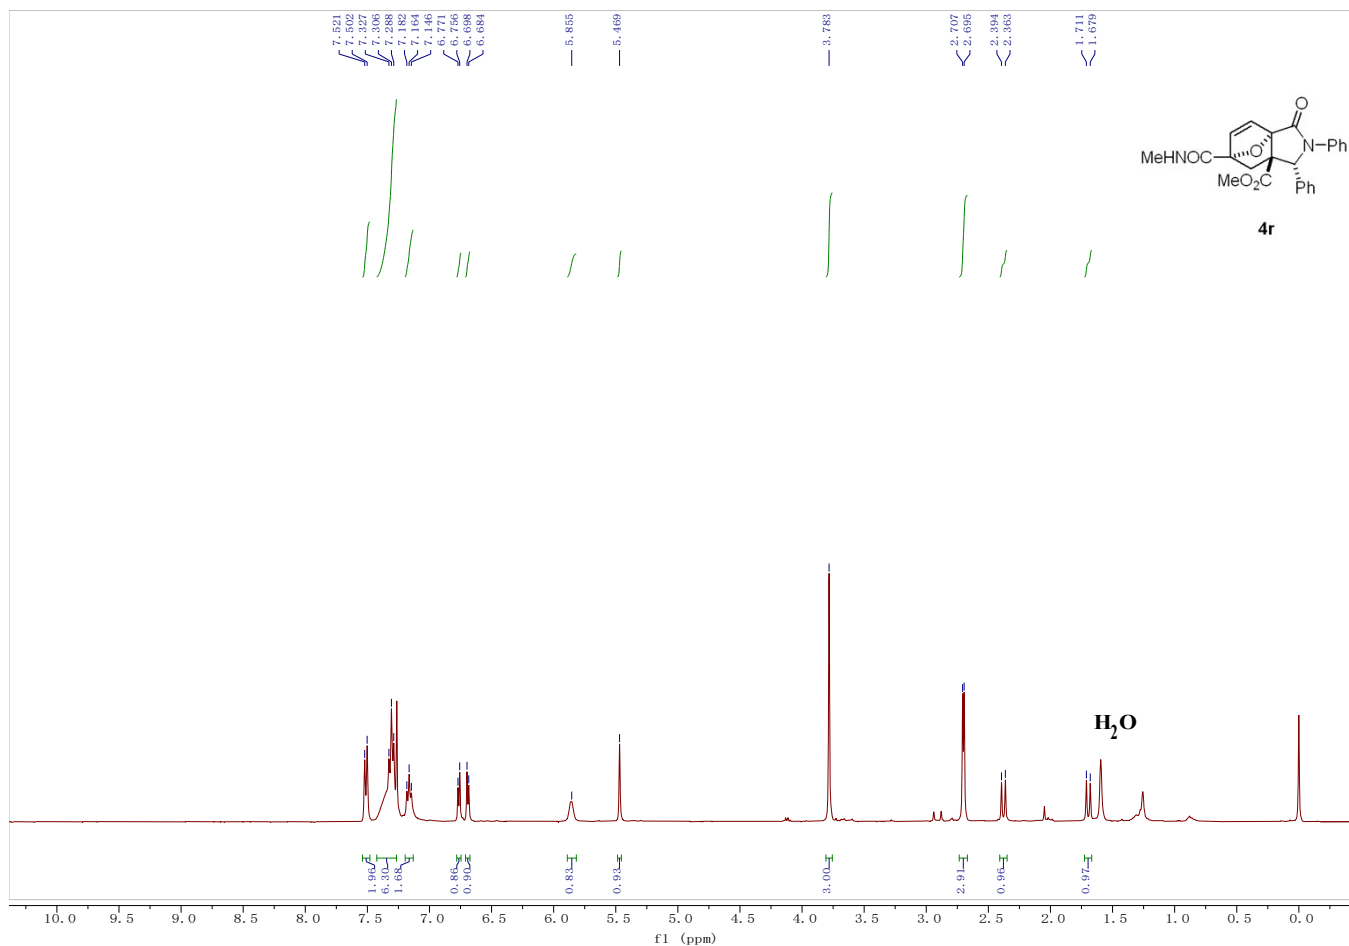

<sup>13</sup>C NMR (101 MHz) in CDCl<sub>3</sub>

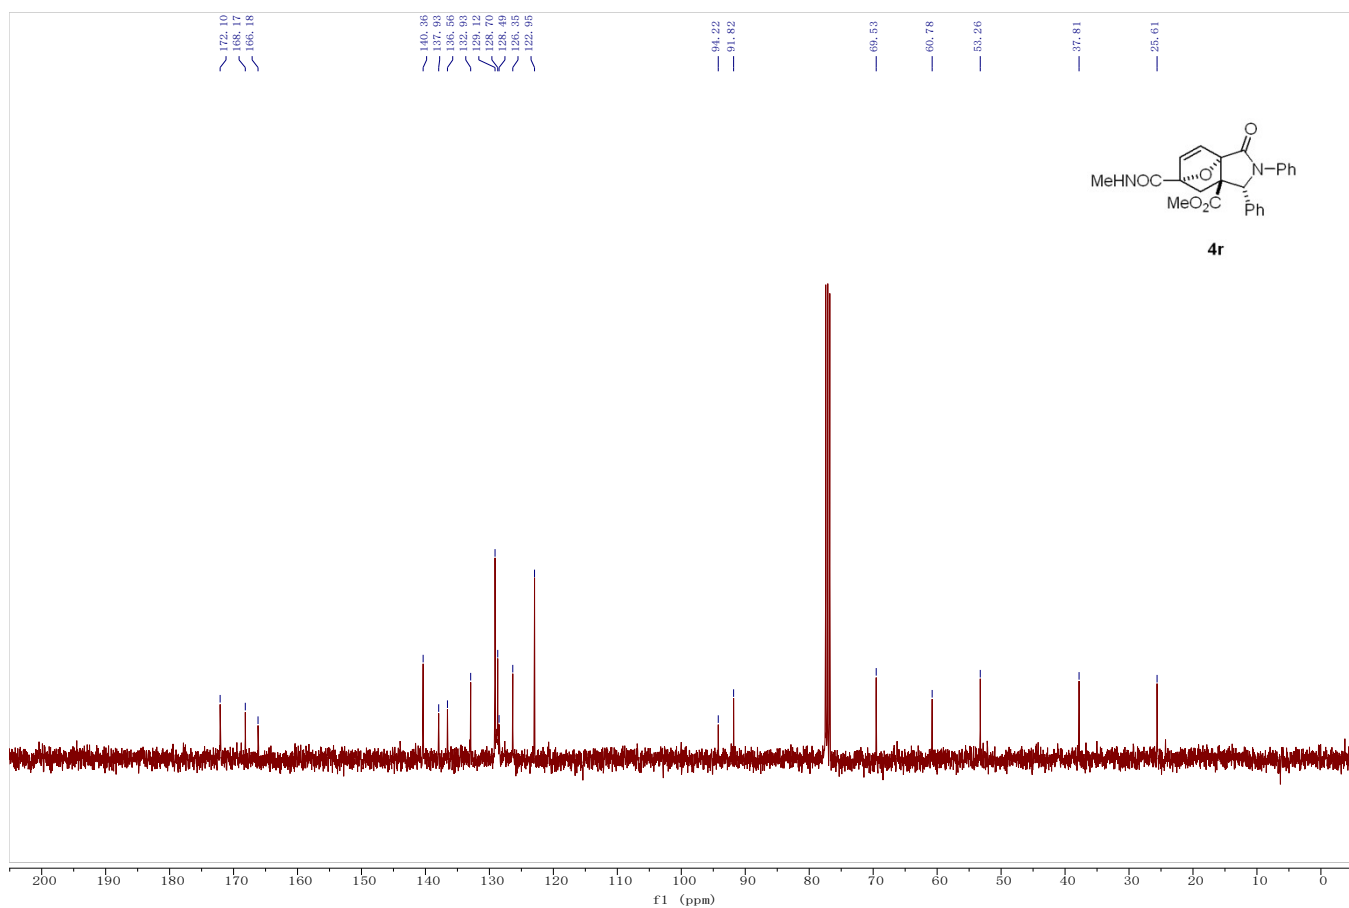

$^1\text{H}$  NMR (400 MHz) in  $\text{CDCl}_3$

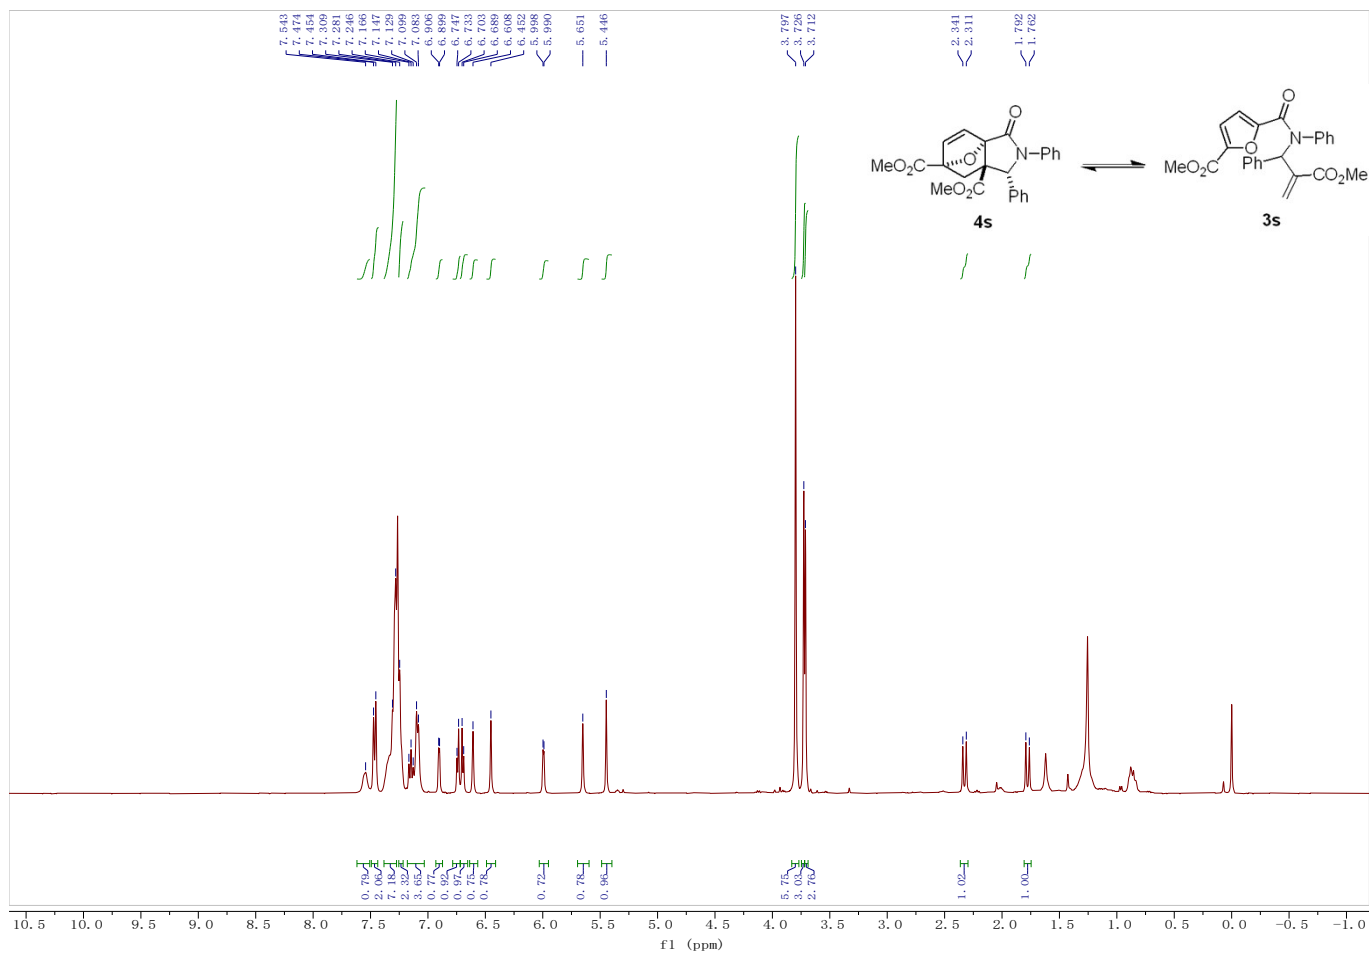

$^1\text{H}$  NMR (400 MHz) in  $\text{CDCl}_3$

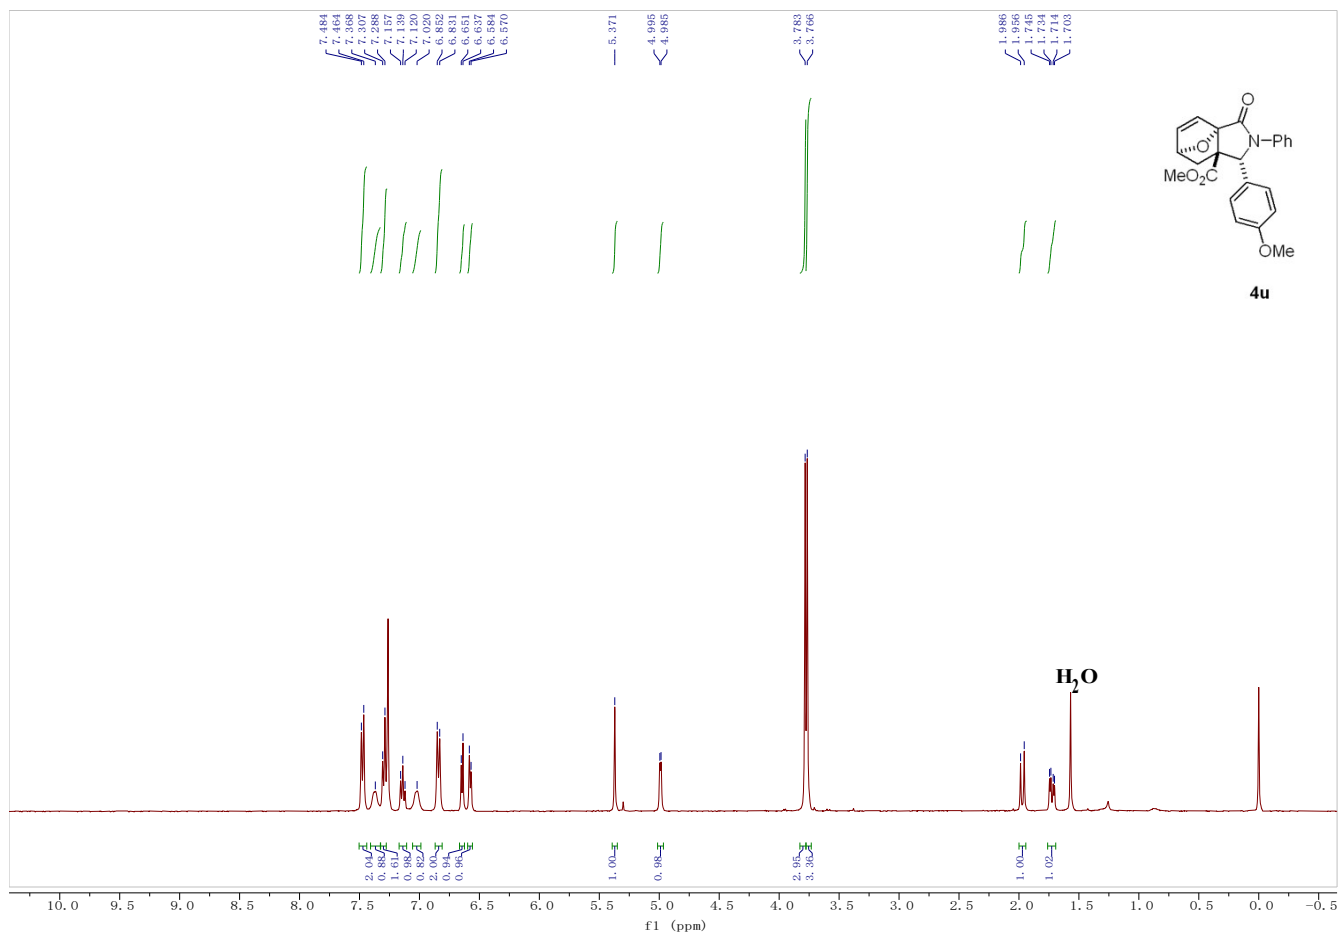

$^{13}\text{C}$  NMR (101 MHz) in  $\text{CDCl}_3$

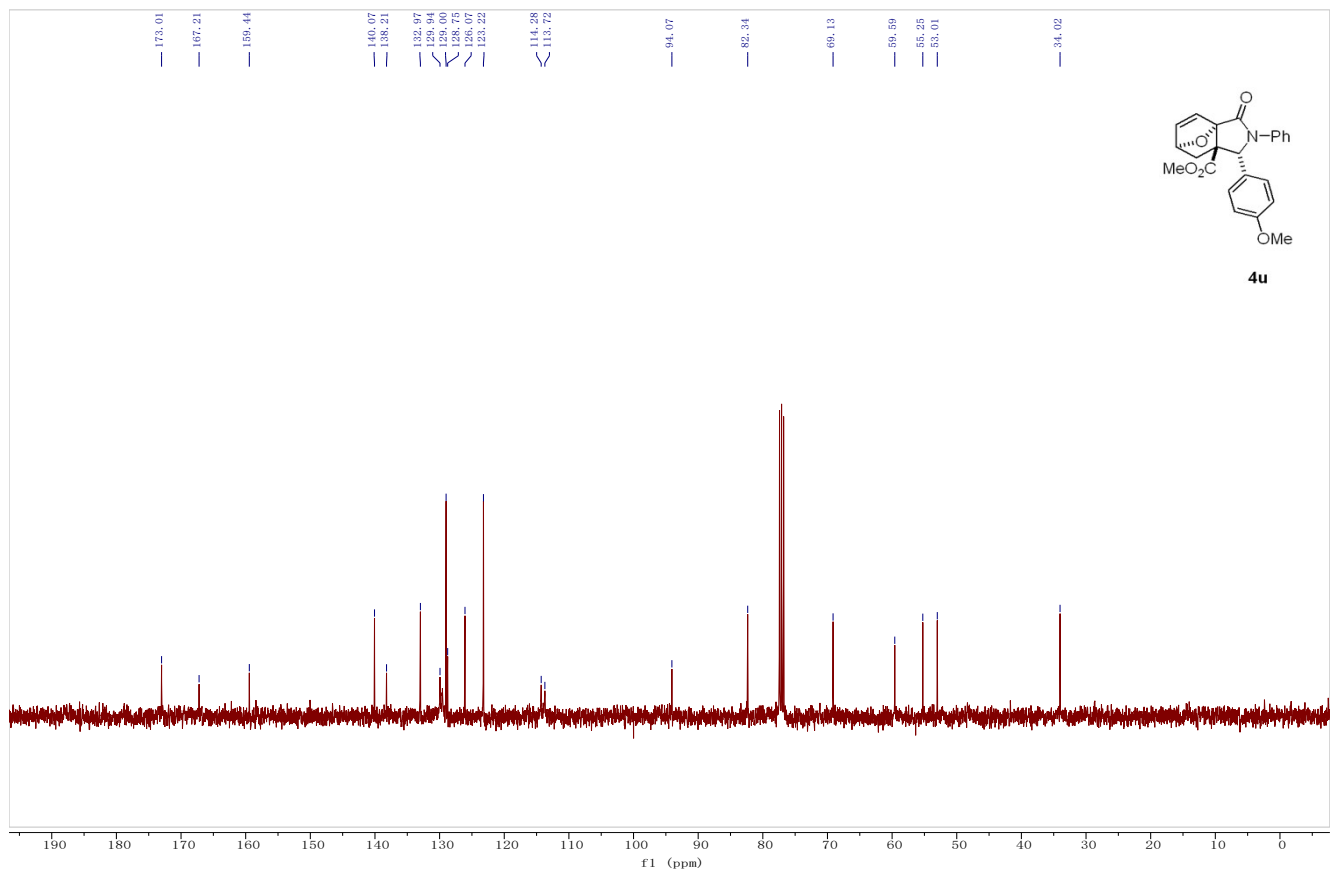

$^1\text{H}$  NMR (400 MHz) in  $\text{CDCl}_3$

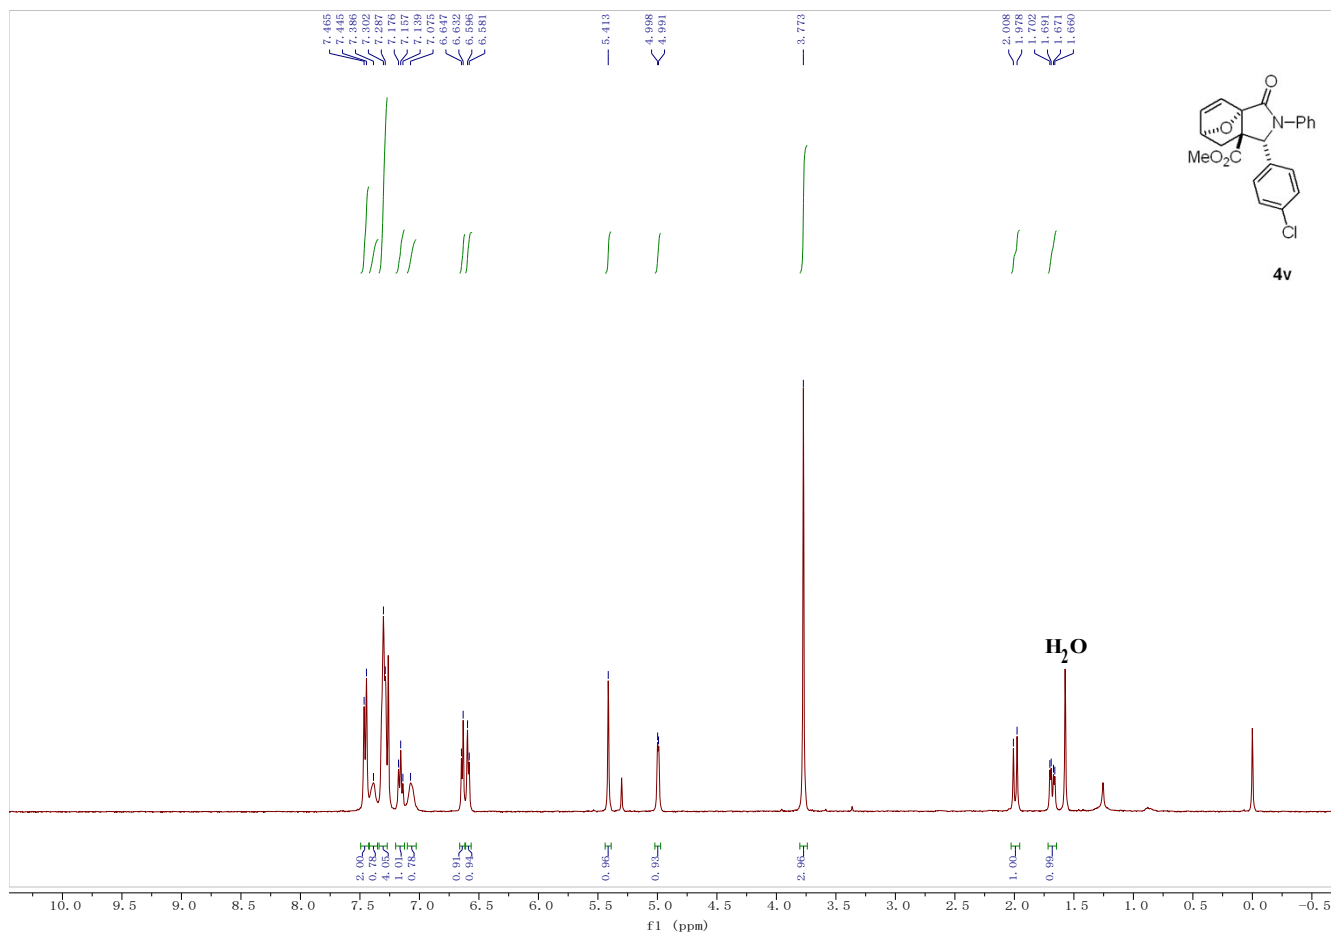

$^{13}\text{C}$  NMR (101 MHz) in  $\text{CDCl}_3$

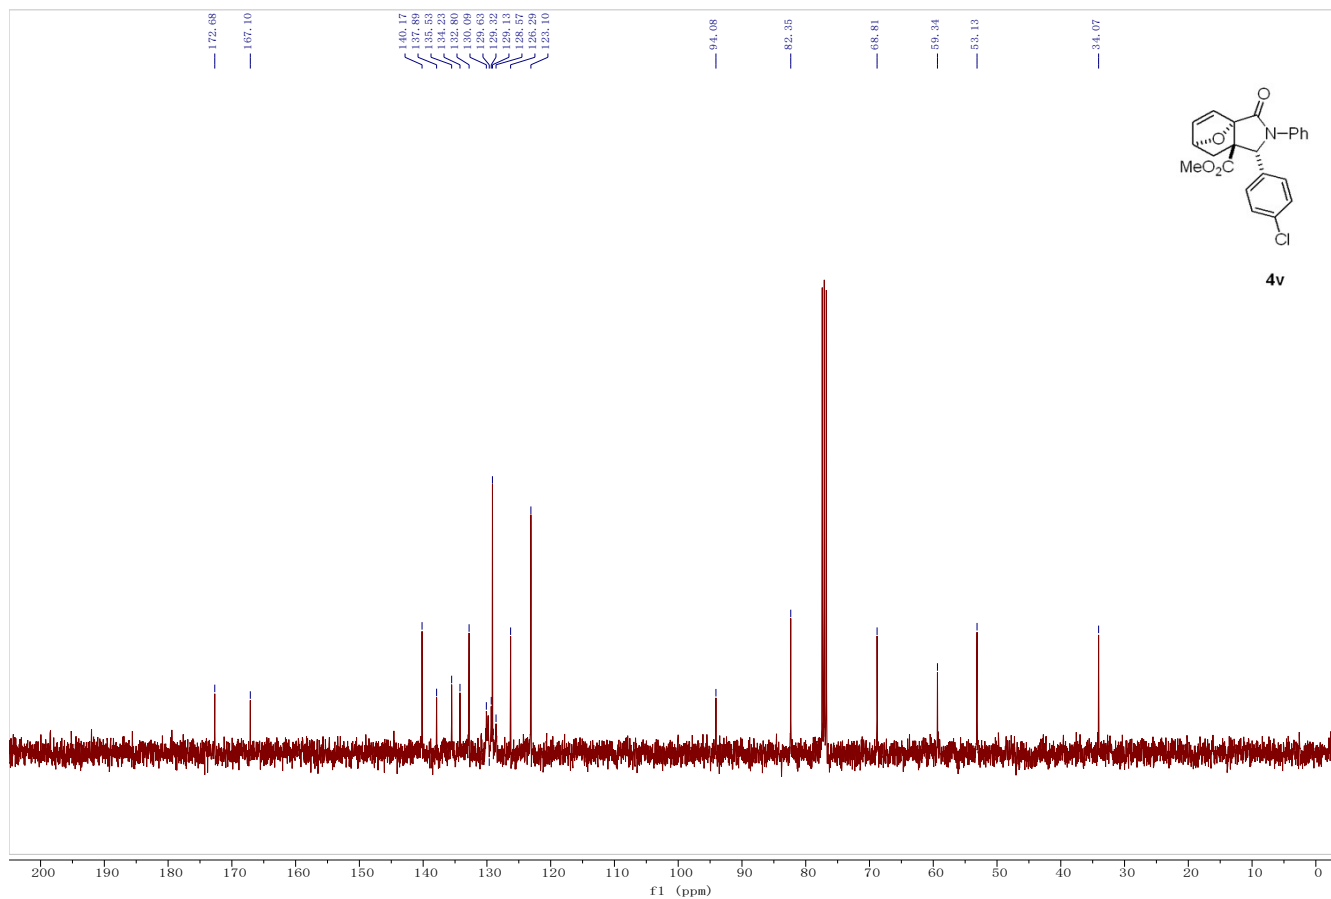

# $^1\text{H}$ NMR (400 MHz) in $\text{CDCl}_3$

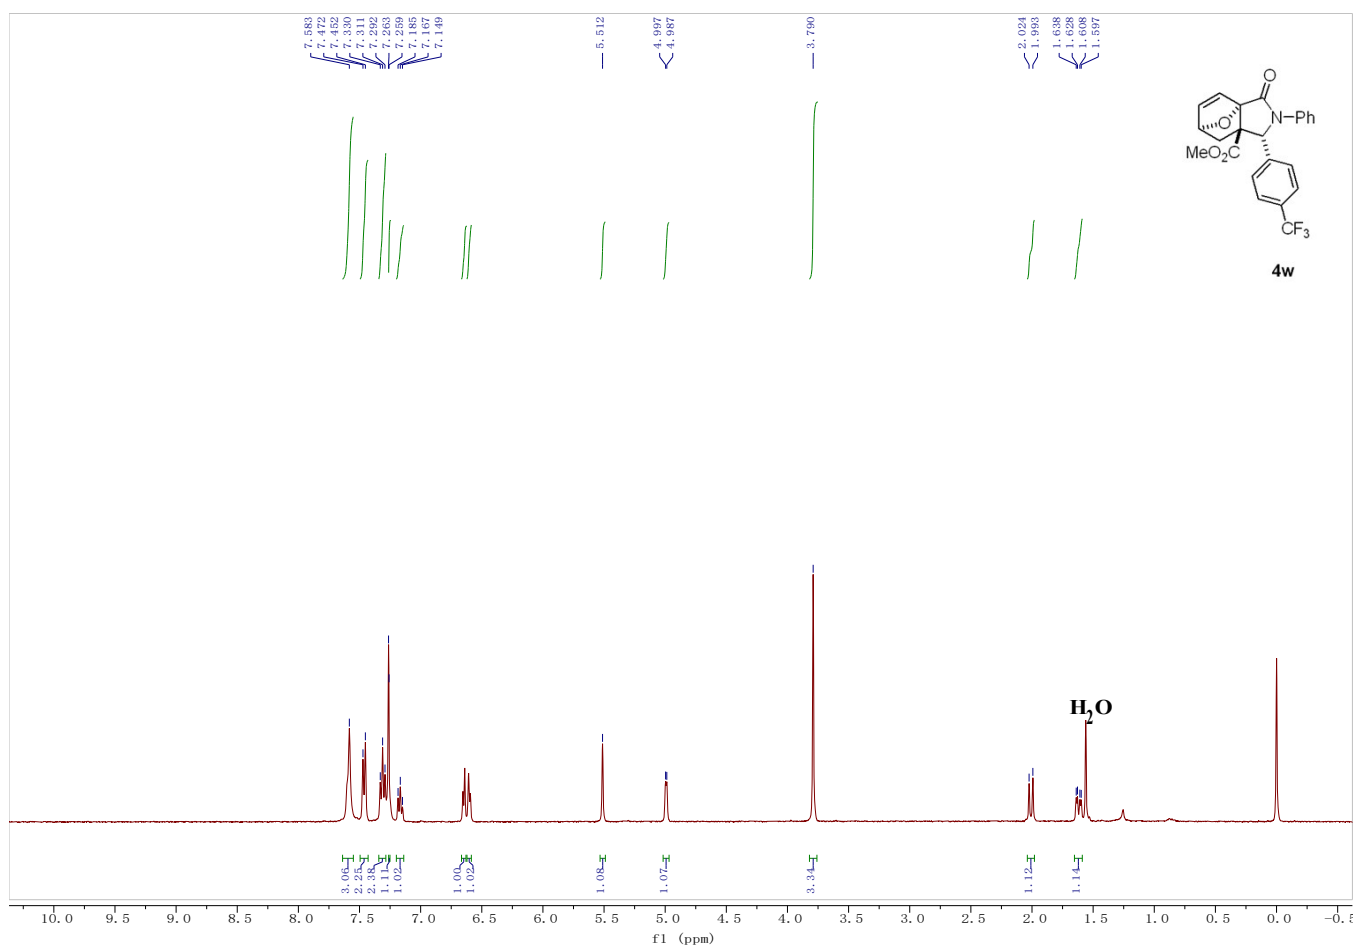

# $^{13}\text{C}$ NMR (101 MHz) in $\text{CDCl}_3$

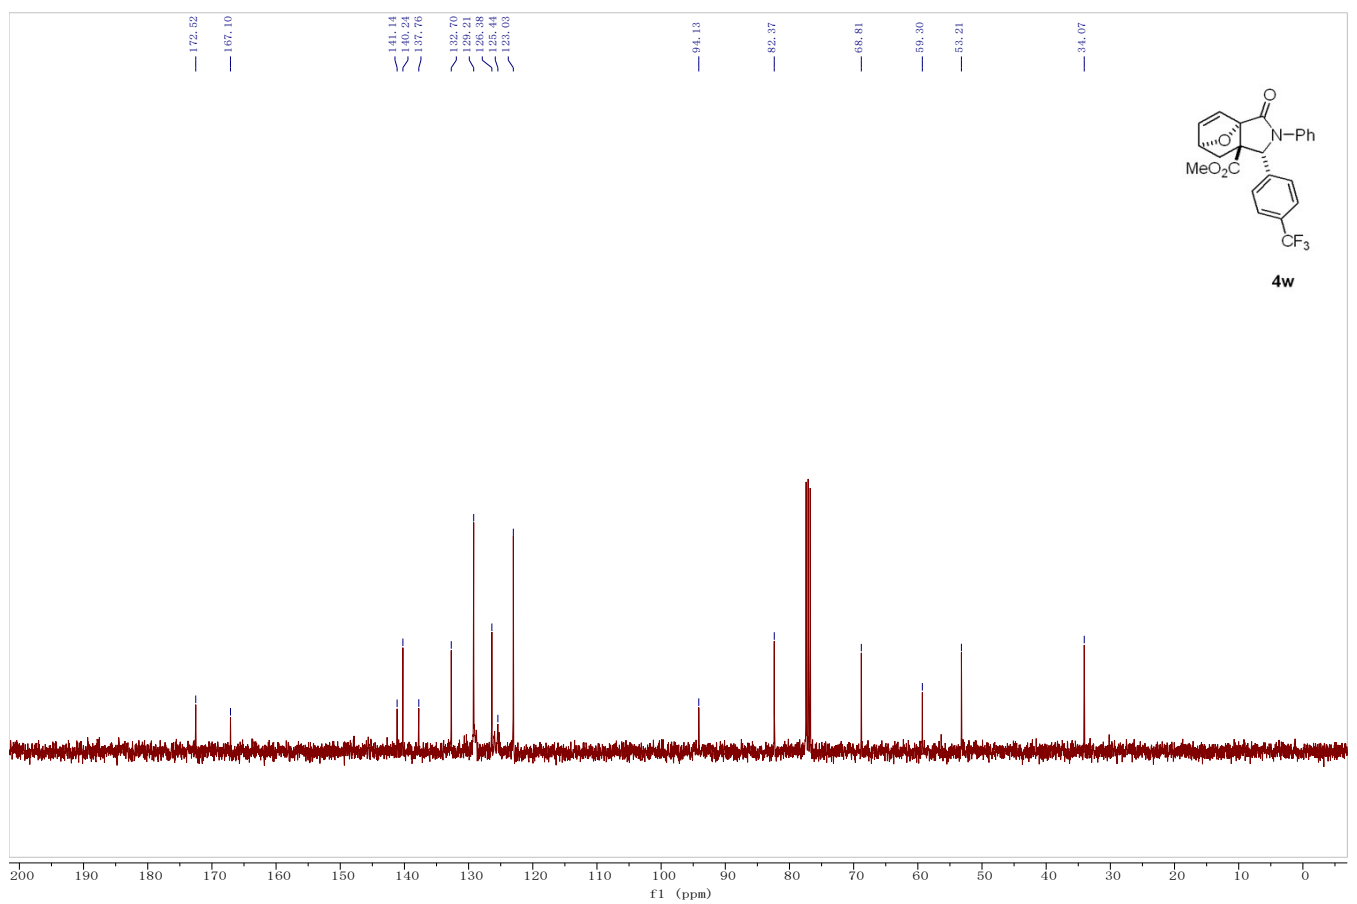

$^{19}\text{F}$  NMR (376 MHz) in  $\text{CDCl}_3$

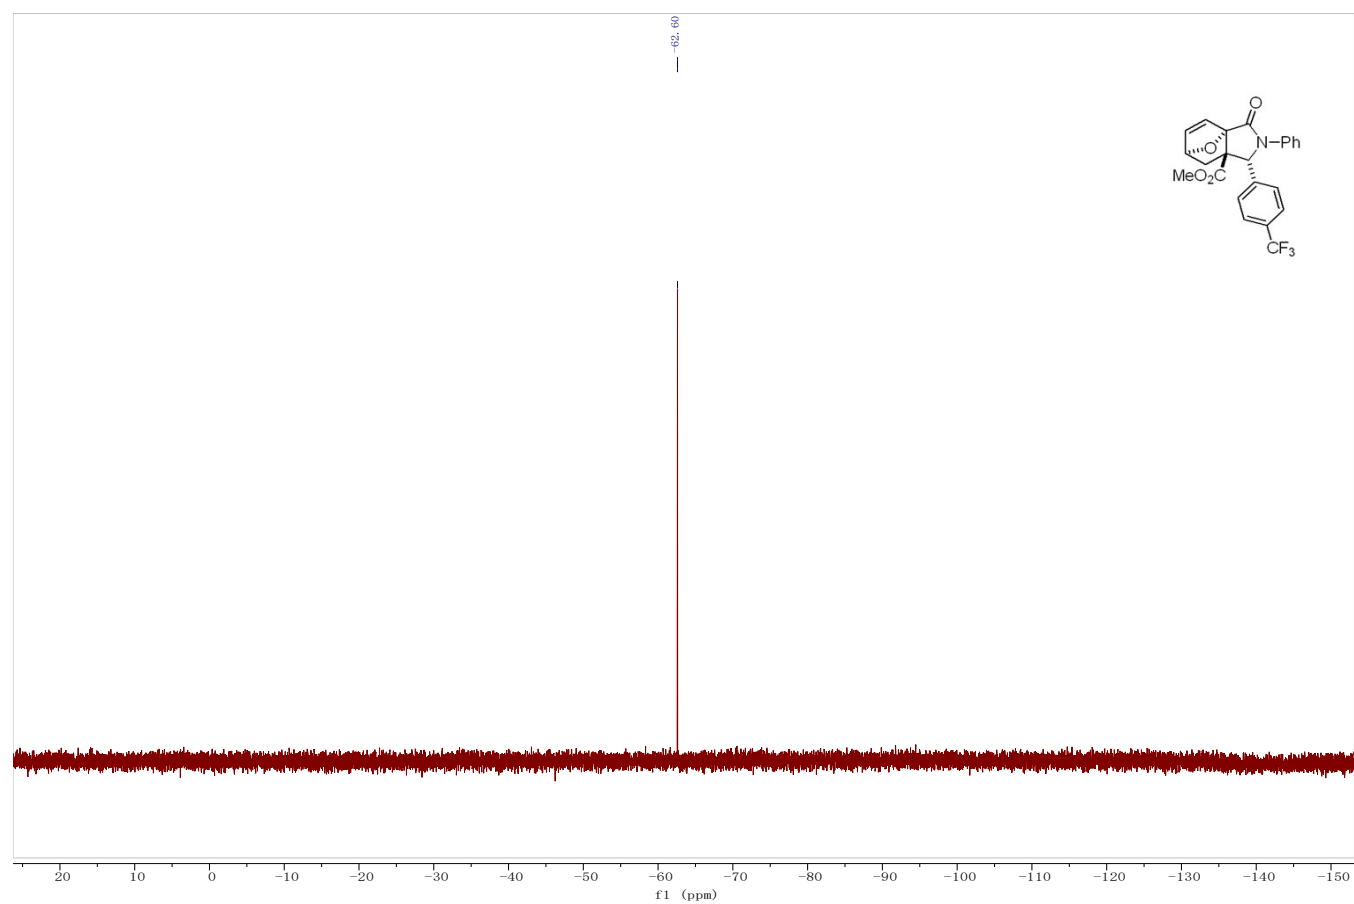

$^1\text{H}$  NMR (400 MHz) in  $\text{CDCl}_3$

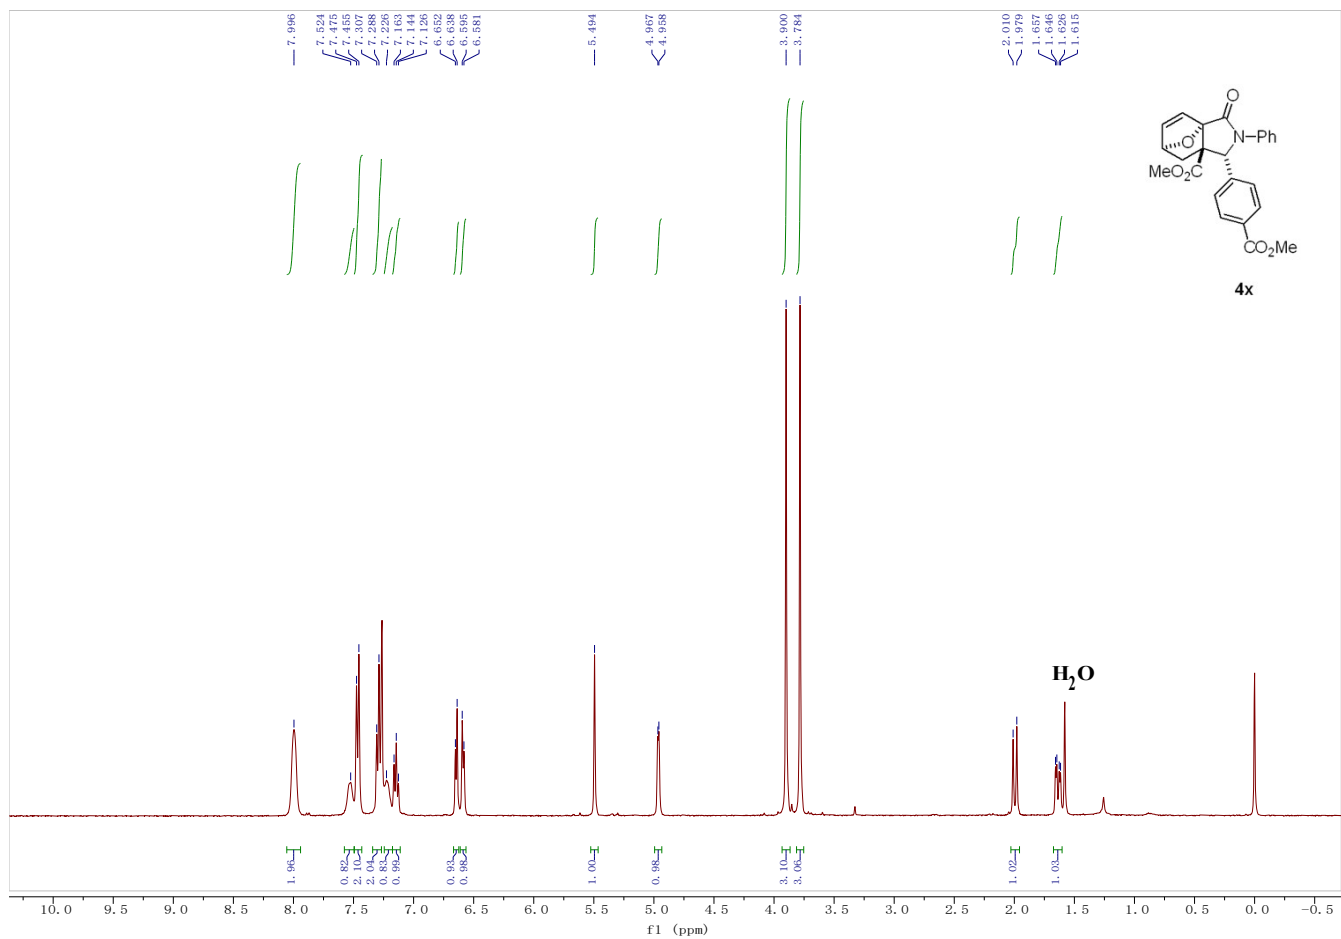

$^{13}\text{C}$  NMR (101 MHz) in  $\text{CDCl}_3$

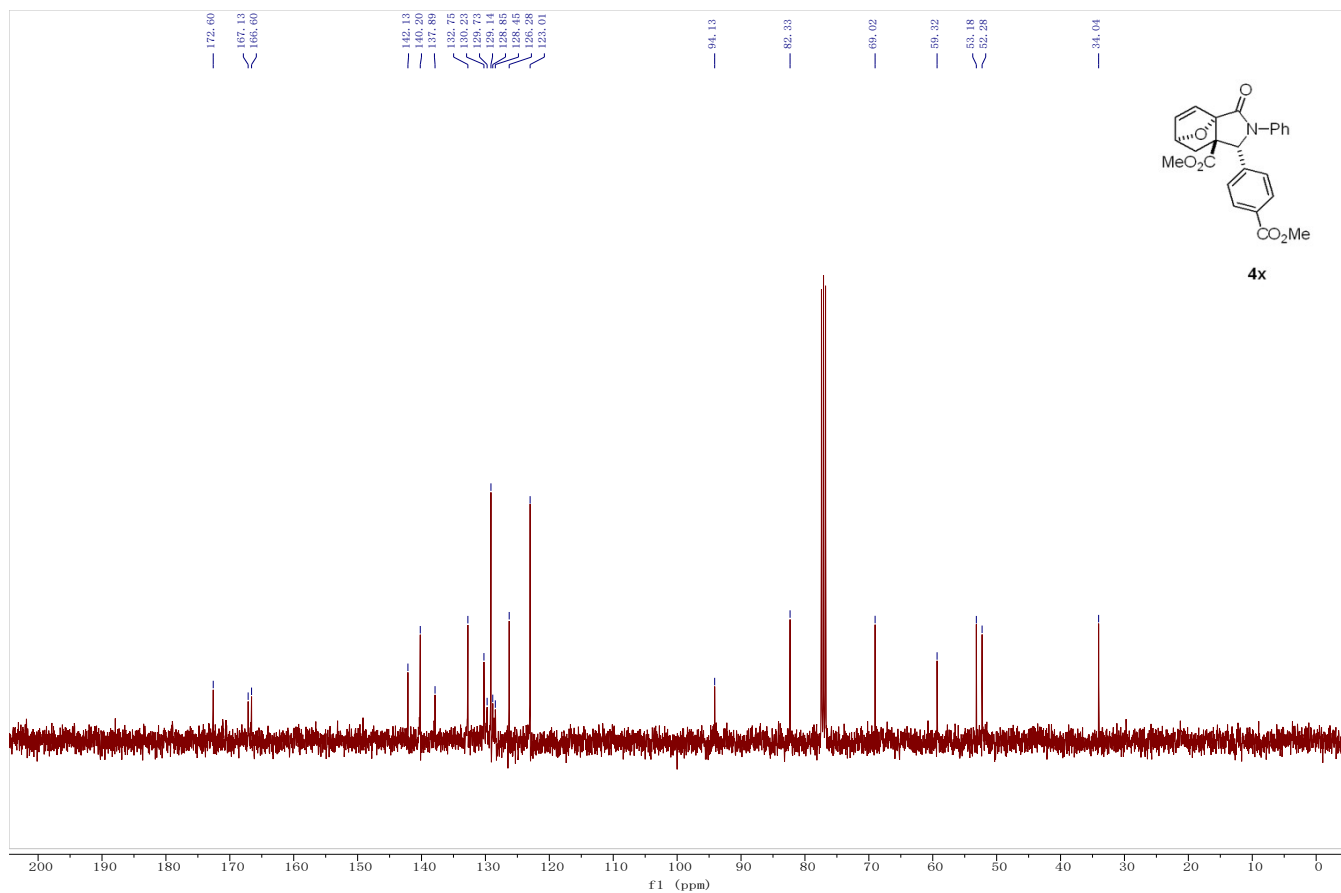

# $^1\text{H}$ NMR (400 MHz) in $\text{CDCl}_3$

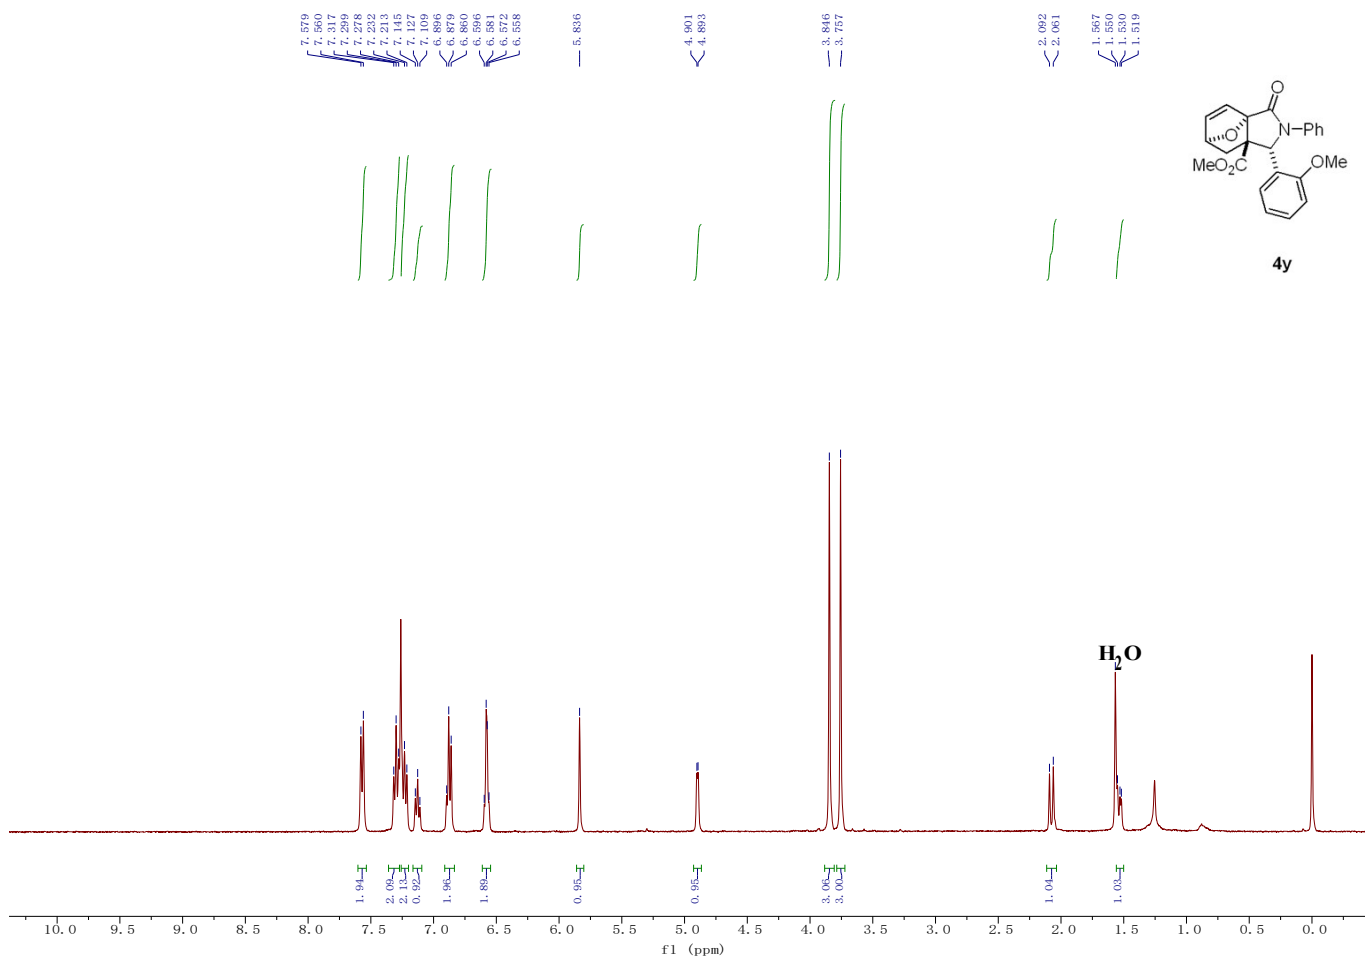

# $^{13}\text{C}$ NMR (101 MHz) in $\text{CDCl}_3$

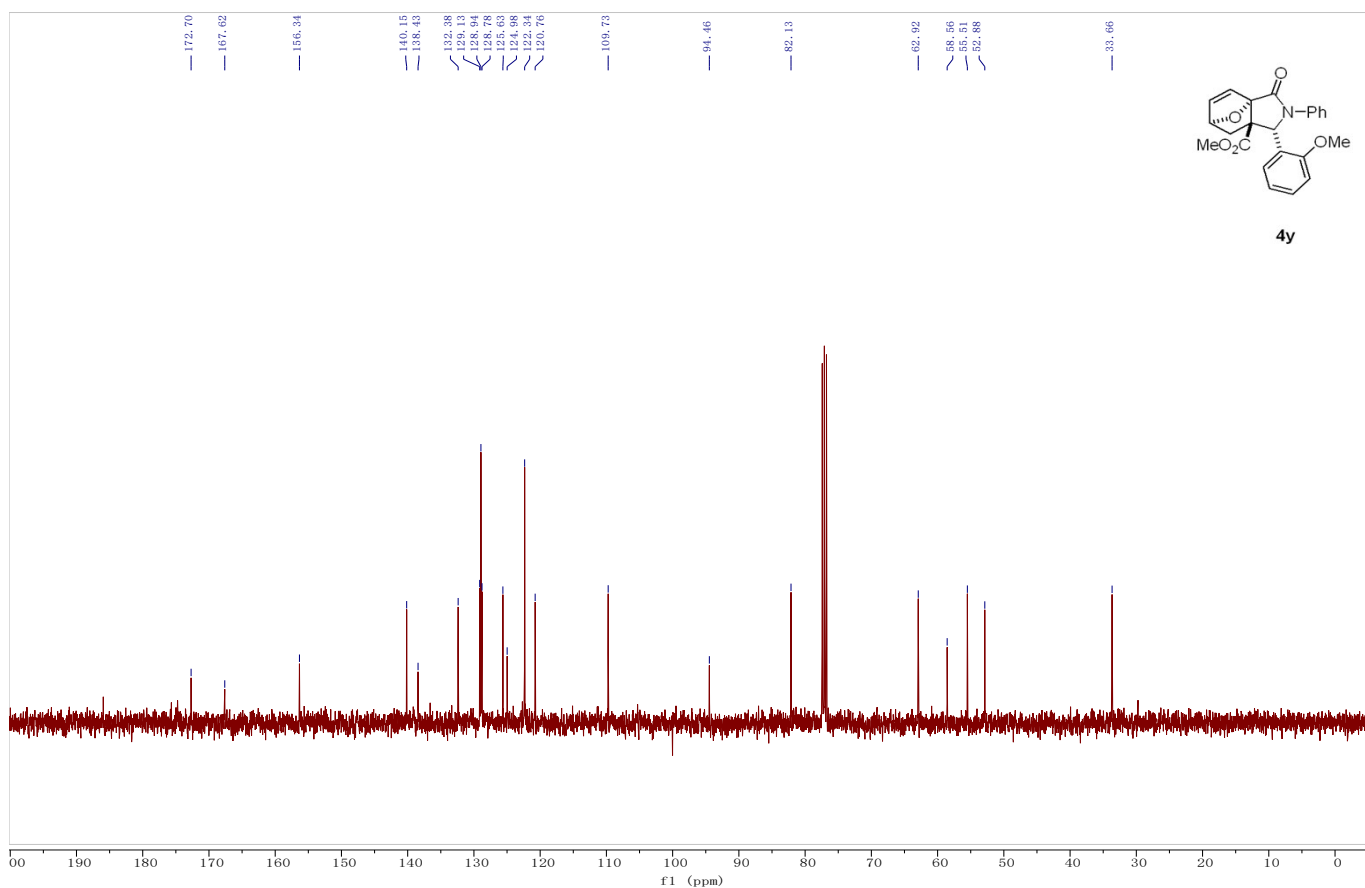

$^1\text{H}$  NMR (400 MHz) in  $\text{CDCl}_3$

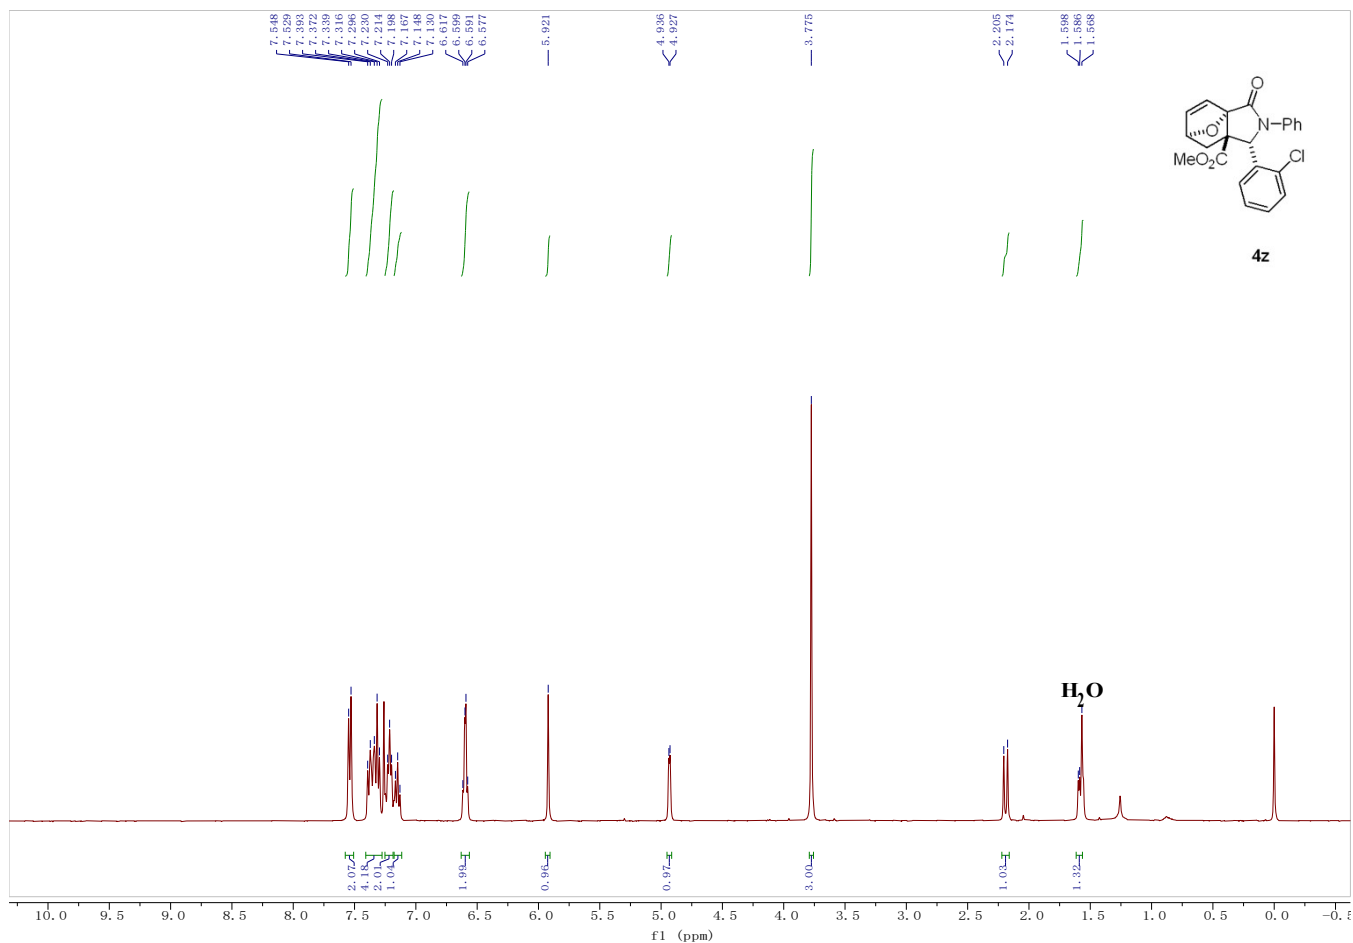

$^{13}\text{C}$  NMR (101 MHz) in  $\text{CDCl}_3$

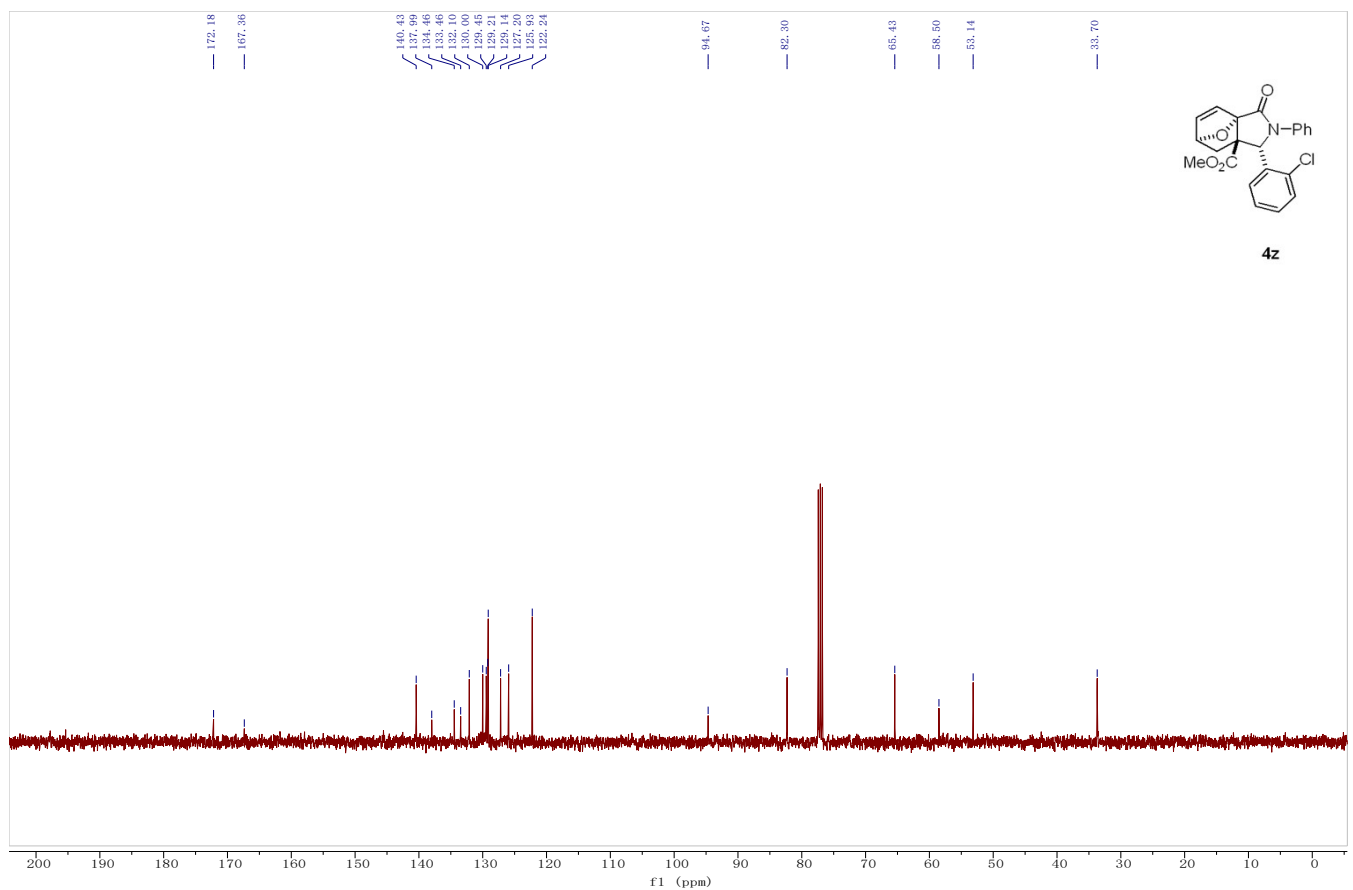

$^1\text{H}$  NMR (400 MHz) in  $\text{CDCl}_3$

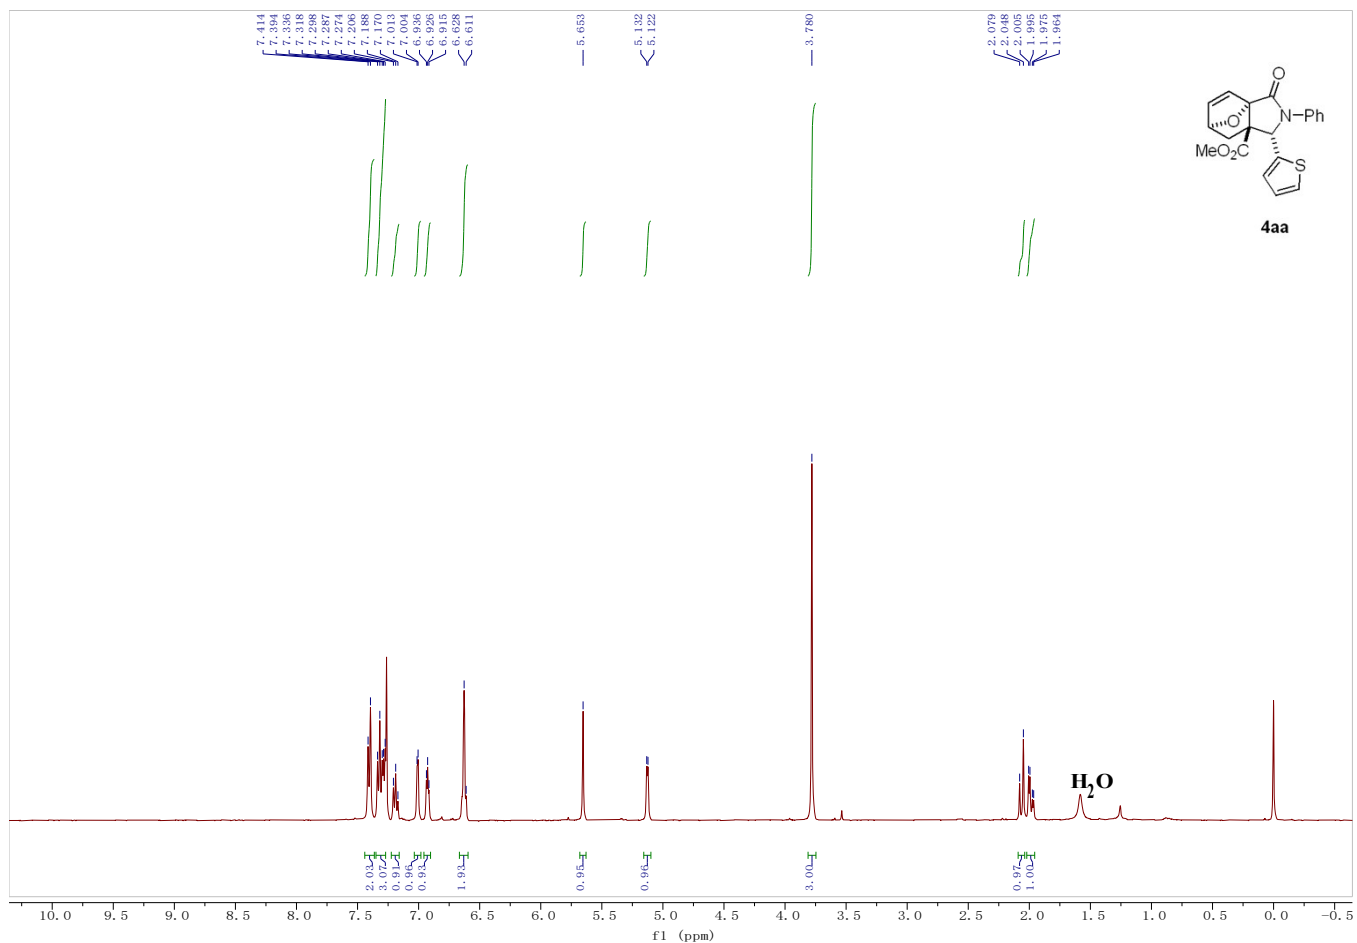

$^{13}\text{C}$  NMR (101 MHz) in  $\text{CDCl}_3$

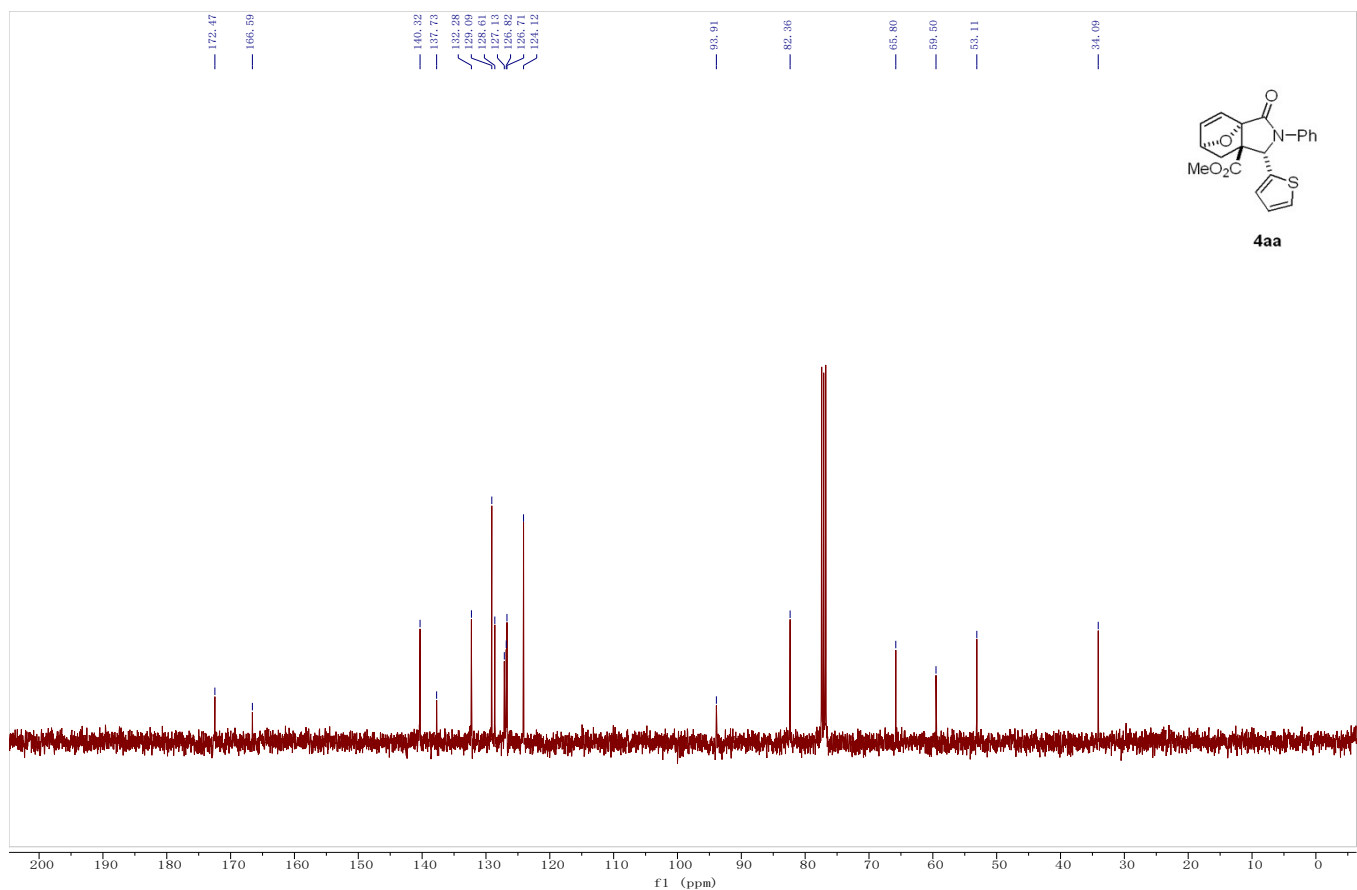

$^1\text{H}$  NMR (400 MHz) in  $\text{CDCl}_3$

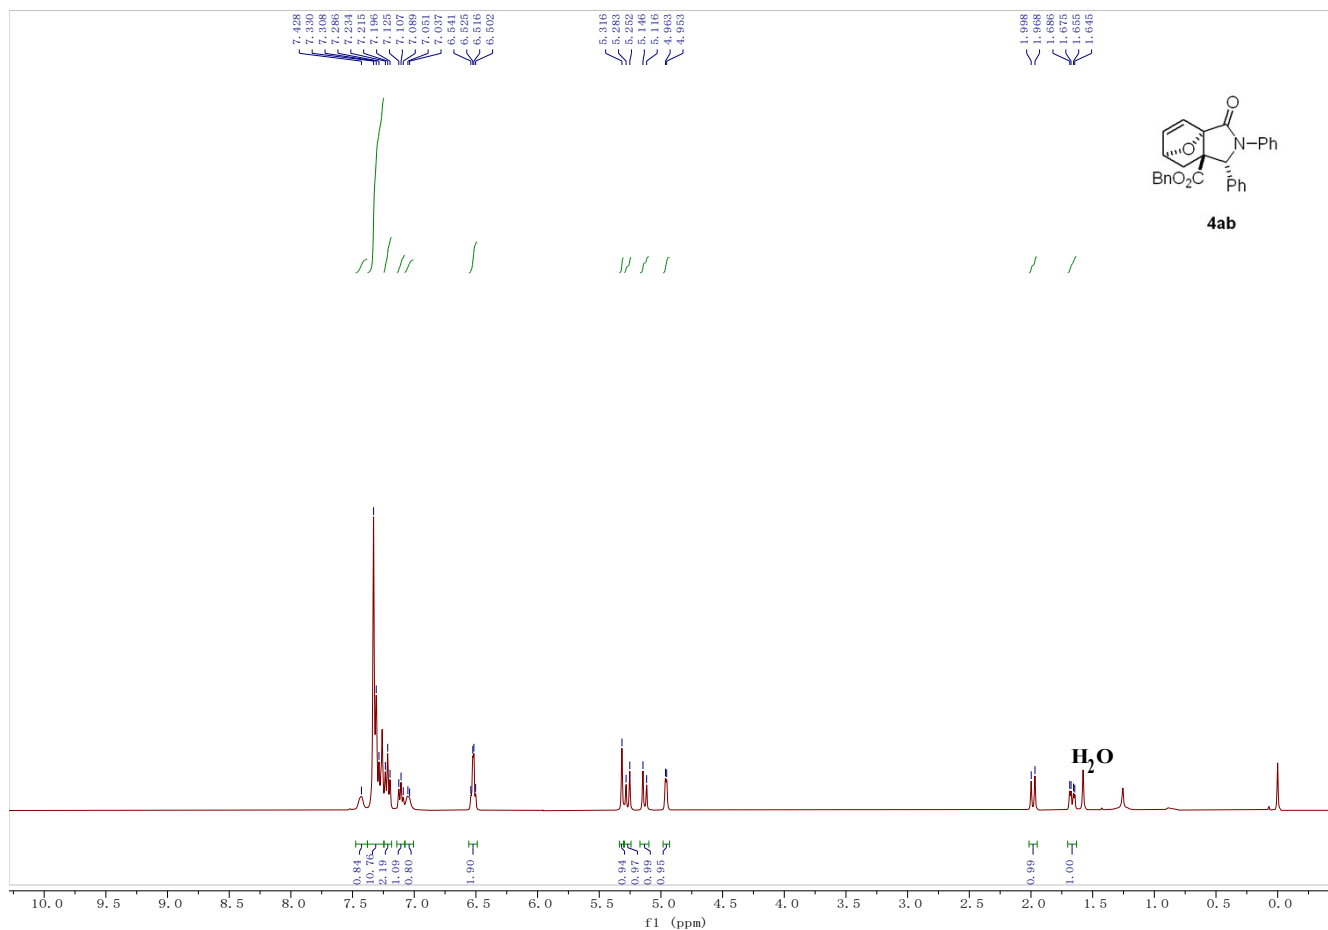

$^{13}\text{C}$  NMR (101 MHz) in  $\text{CDCl}_3$

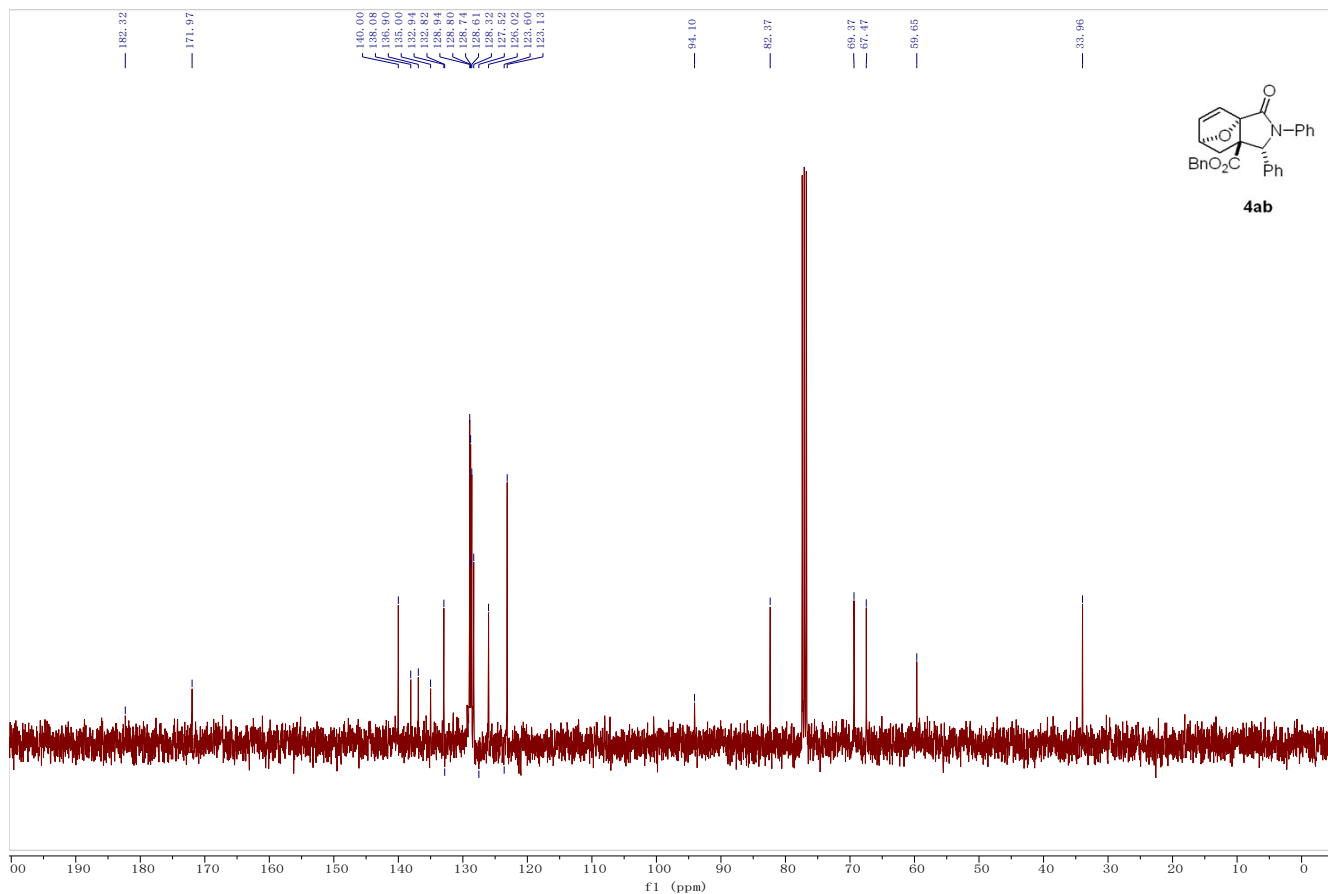

$^1\text{H}$  NMR (400 MHz) in  $\text{CDCl}_3$

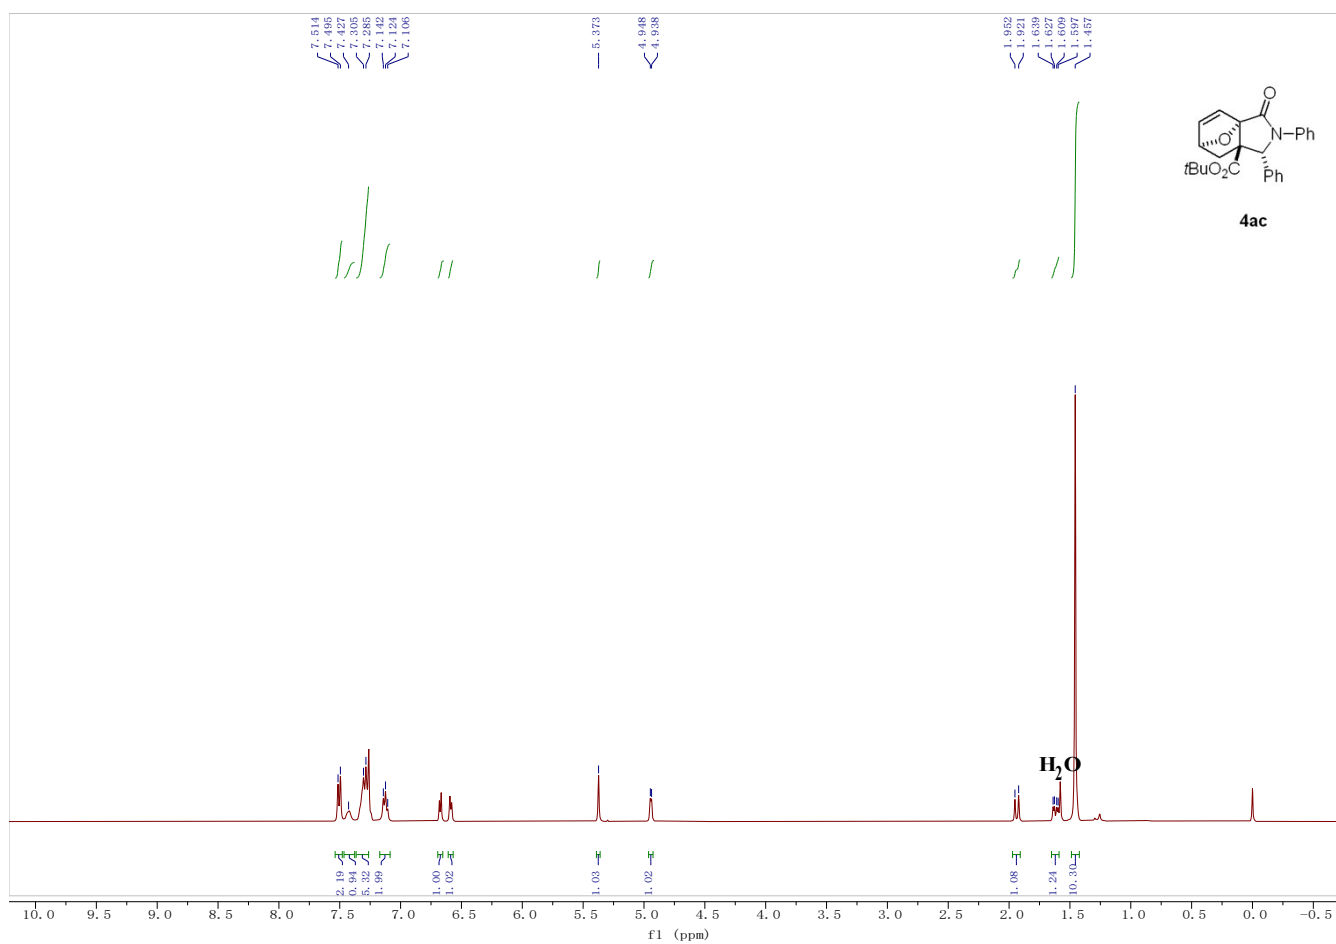

$^{13}\text{C}$  NMR (101 MHz) in  $\text{CDCl}_3$

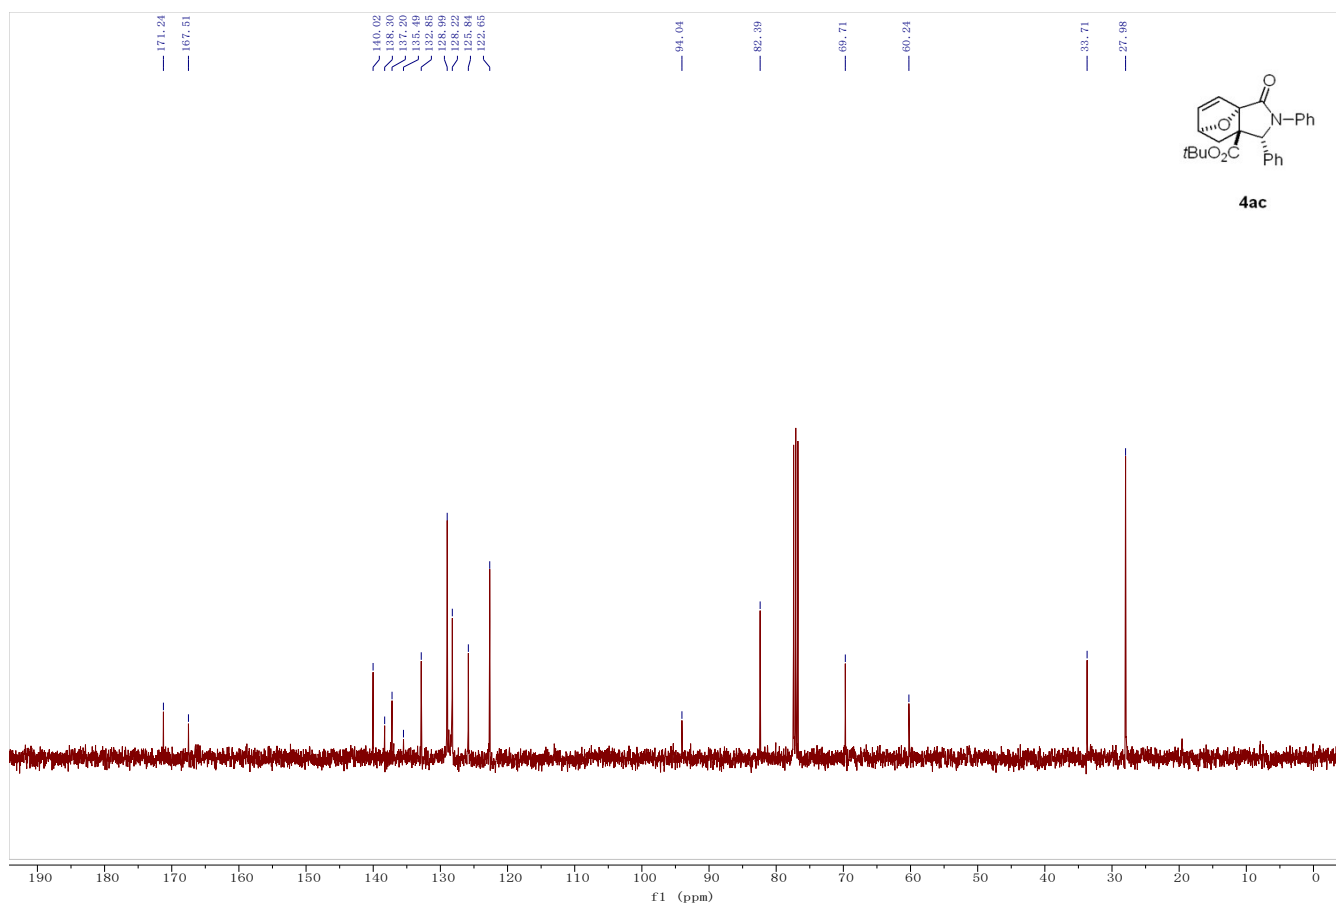

$^1\text{H}$  NMR (400 MHz) in  $\text{CDCl}_3$

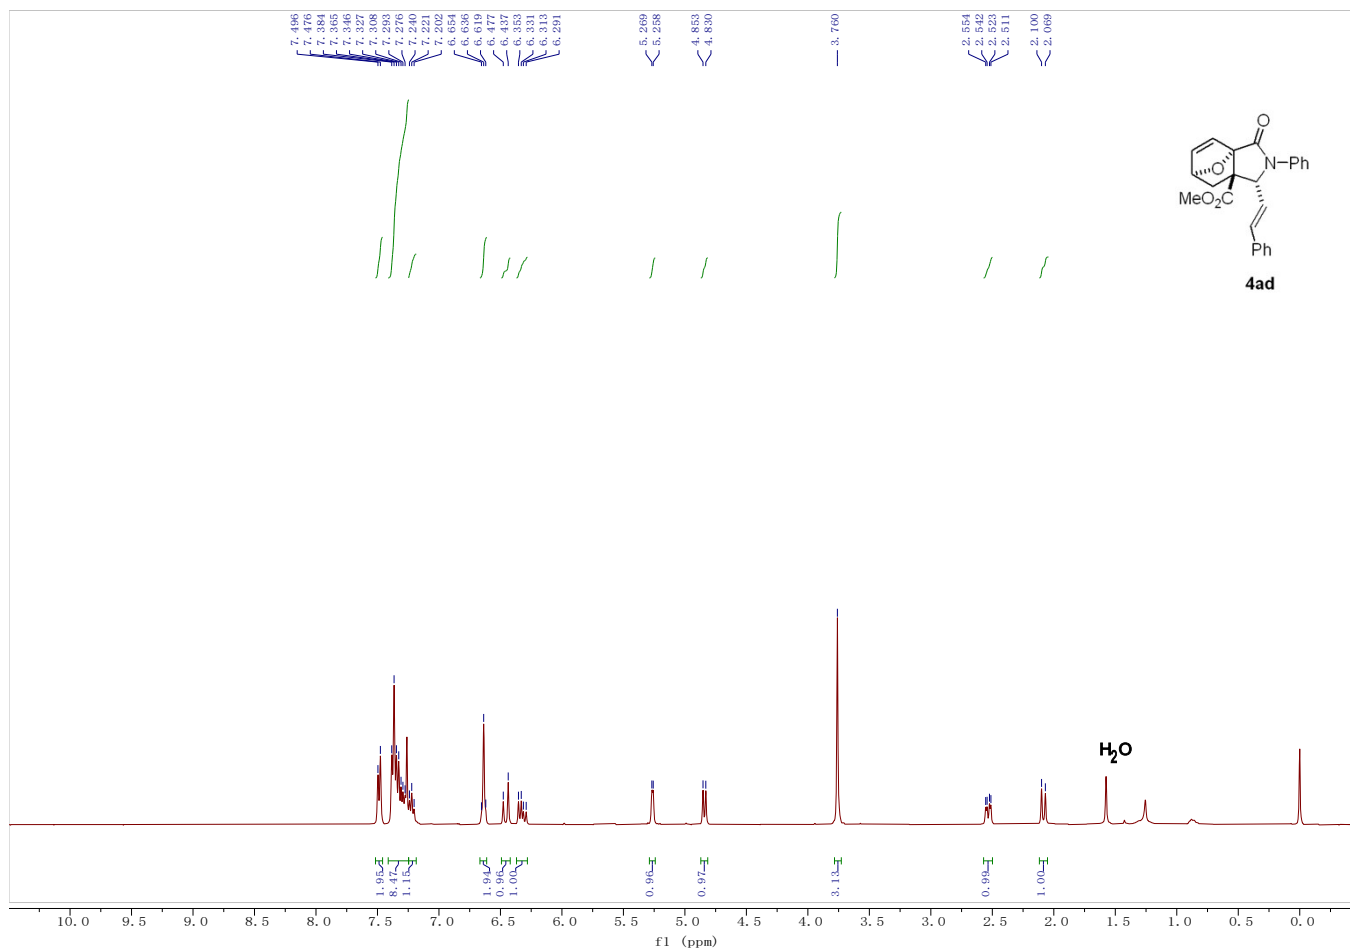

$^{13}\text{C}$  NMR (101 MHz) in  $\text{CDCl}_3$

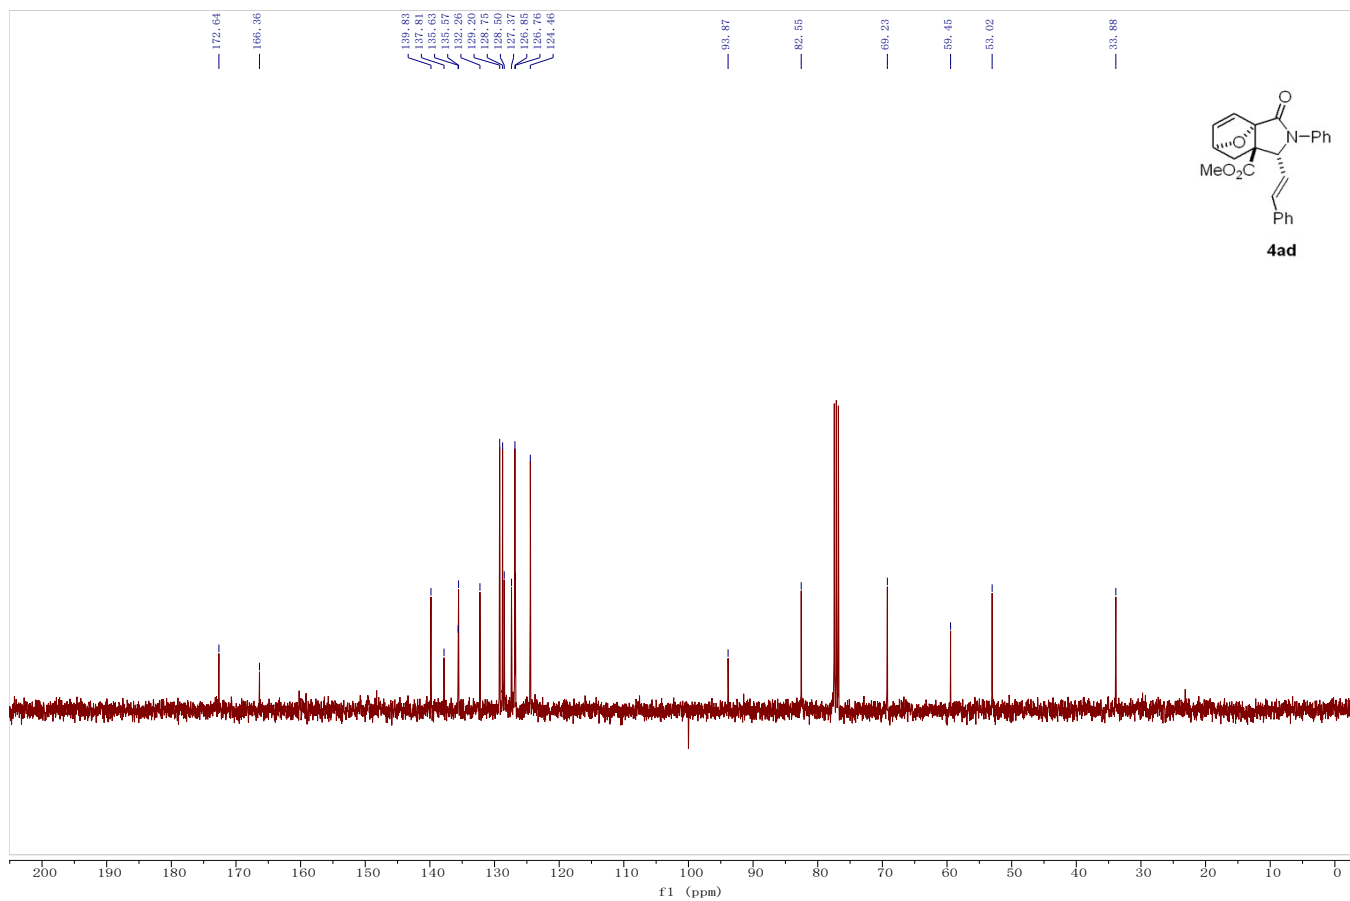

$^1\text{H}$  NMR (400 MHz) in  $\text{CDCl}_3$

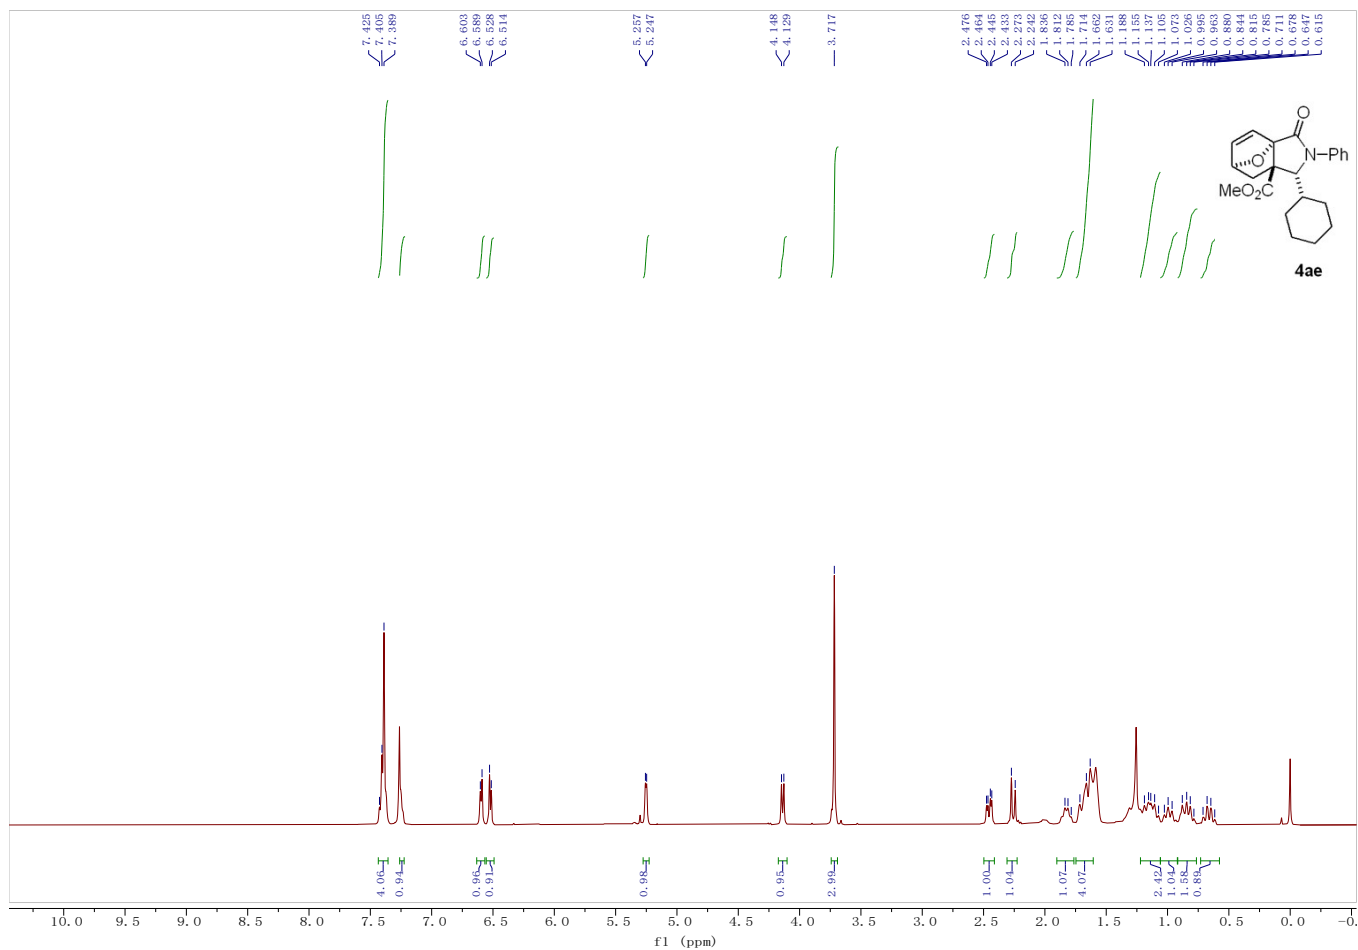

$^{13}\text{C}$  NMR (101 MHz) in  $\text{CDCl}_3$

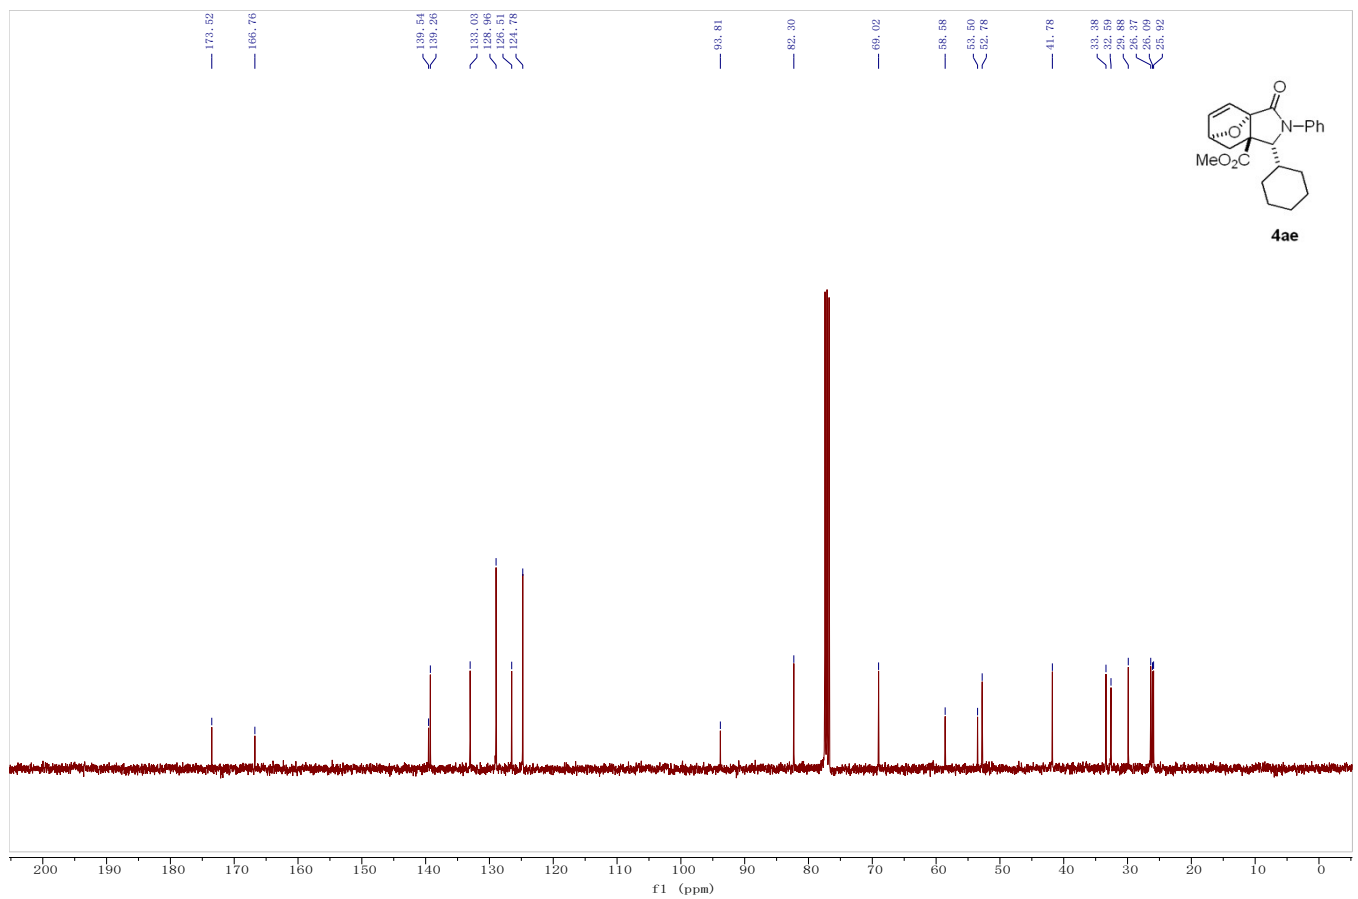

$^1\text{H}$  NMR (400 MHz) in  $\text{CDCl}_3$

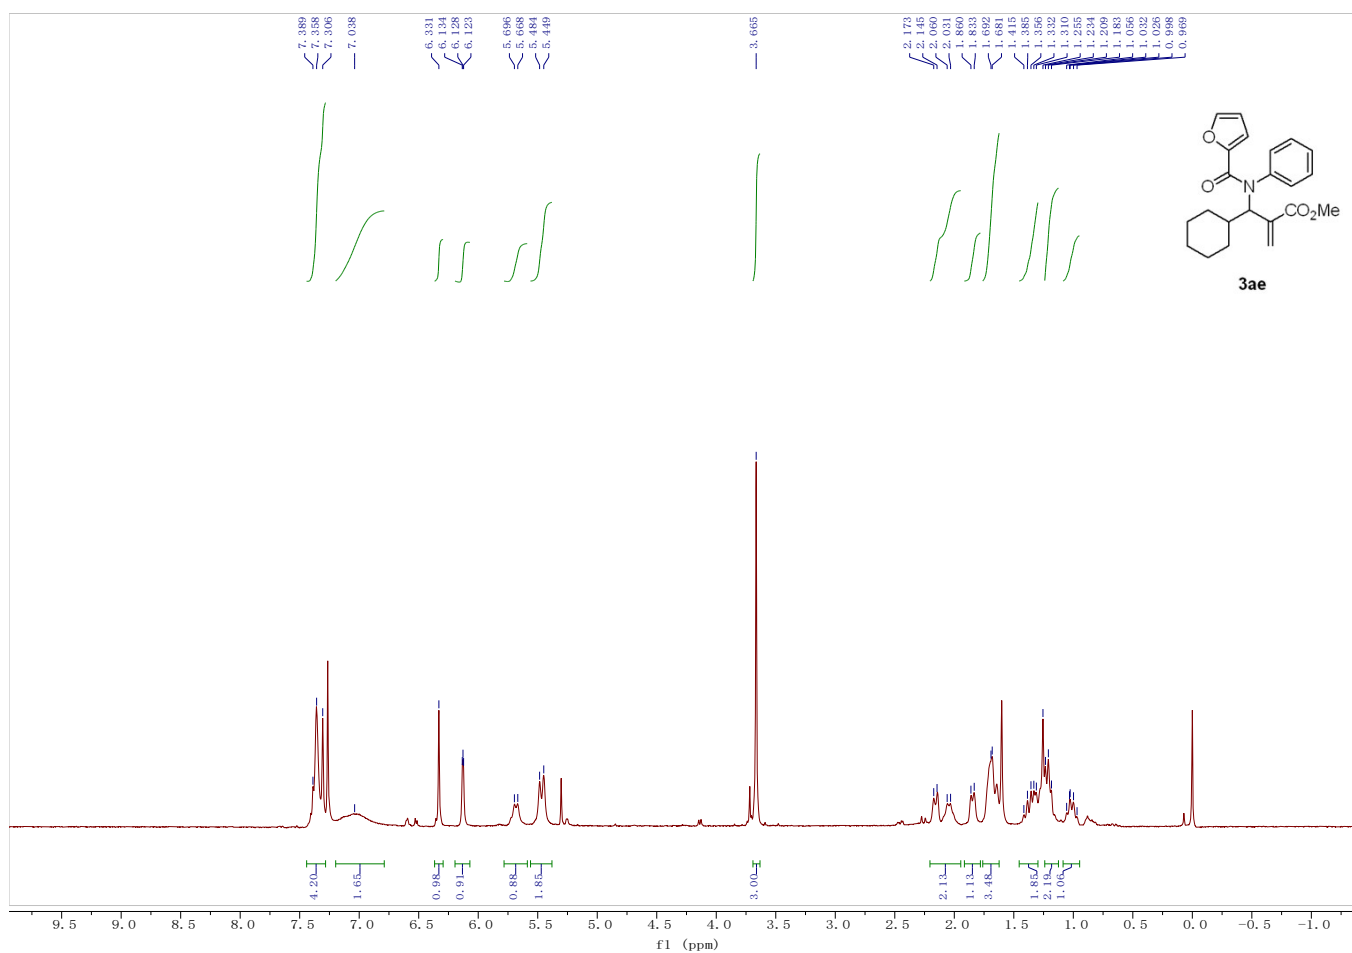

$^{13}\text{C}$  NMR (101 MHz) in  $\text{CDCl}_3$

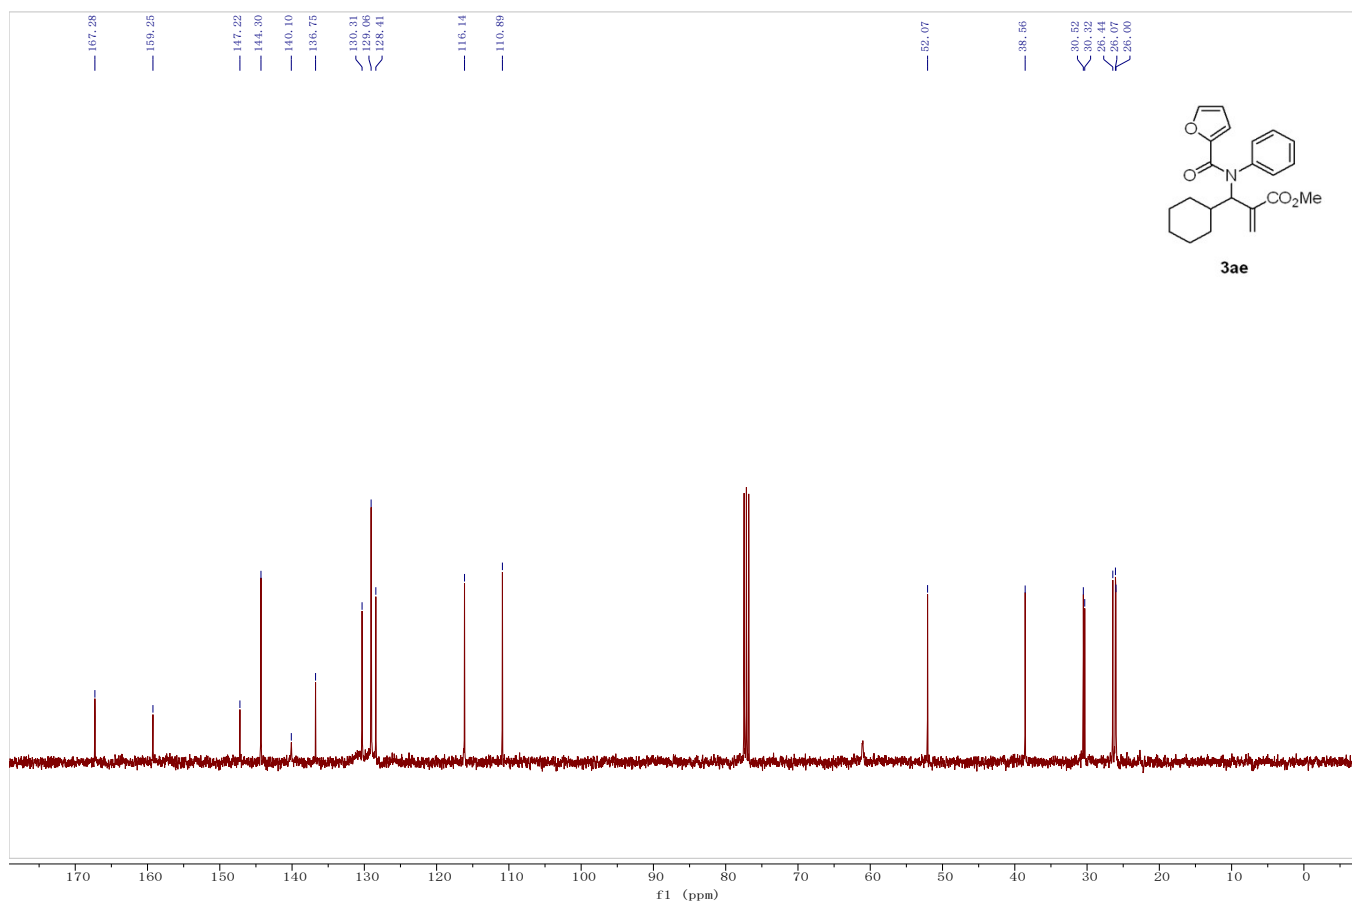

# $^1\text{H}$ NMR (400 MHz) in $\text{CDCl}_3$

c169-2N

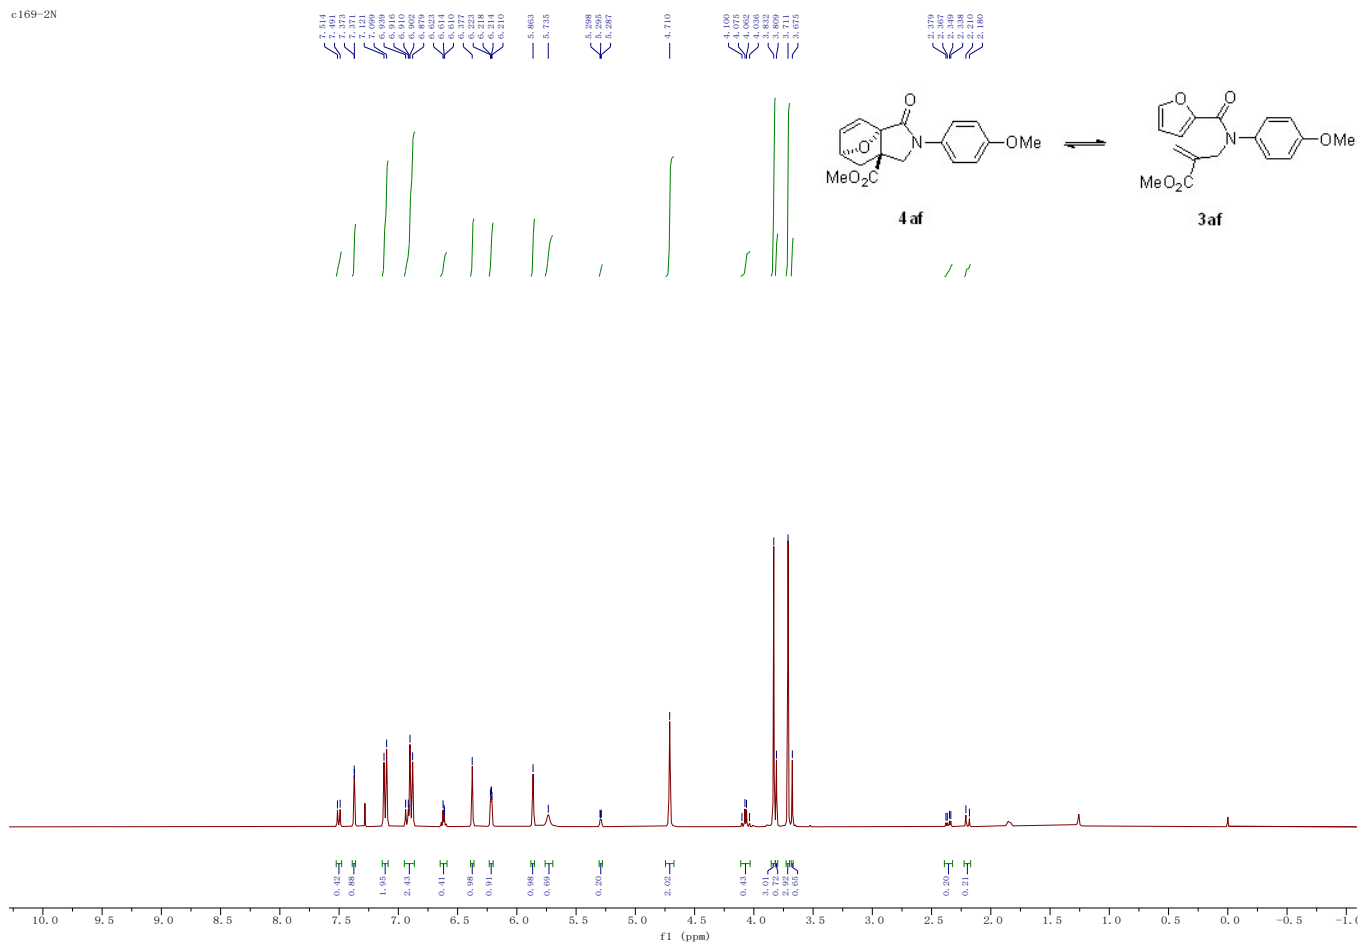

$^1\text{H}$  NMR (400 MHz) in  $\text{CDCl}_3$

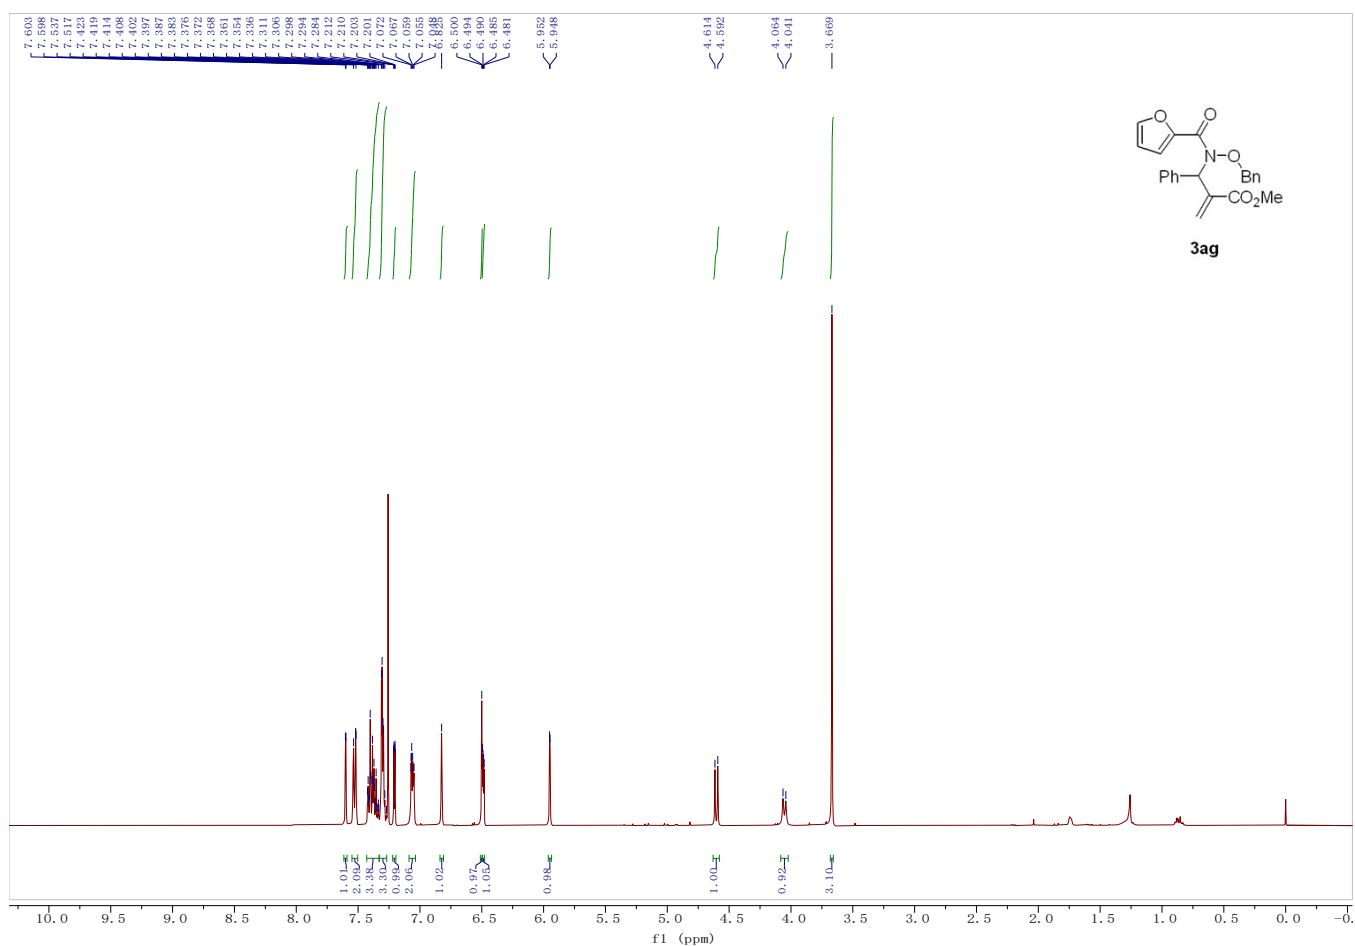

$^{13}\text{C}$  NMR (101 MHz) in  $\text{CDCl}_3$

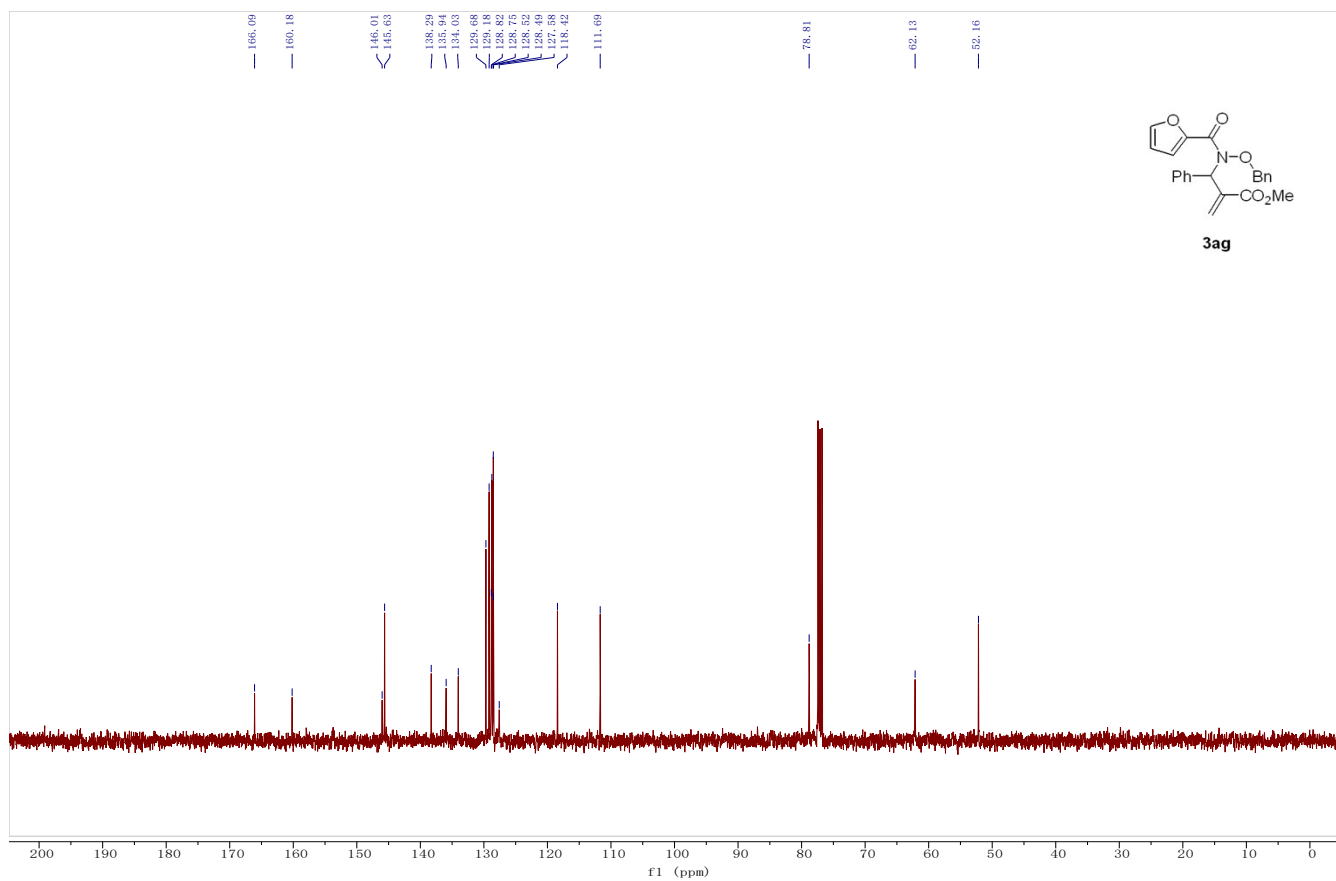

$^1\text{H}$  NMR (400 MHz) in  $\text{CDCl}_3$

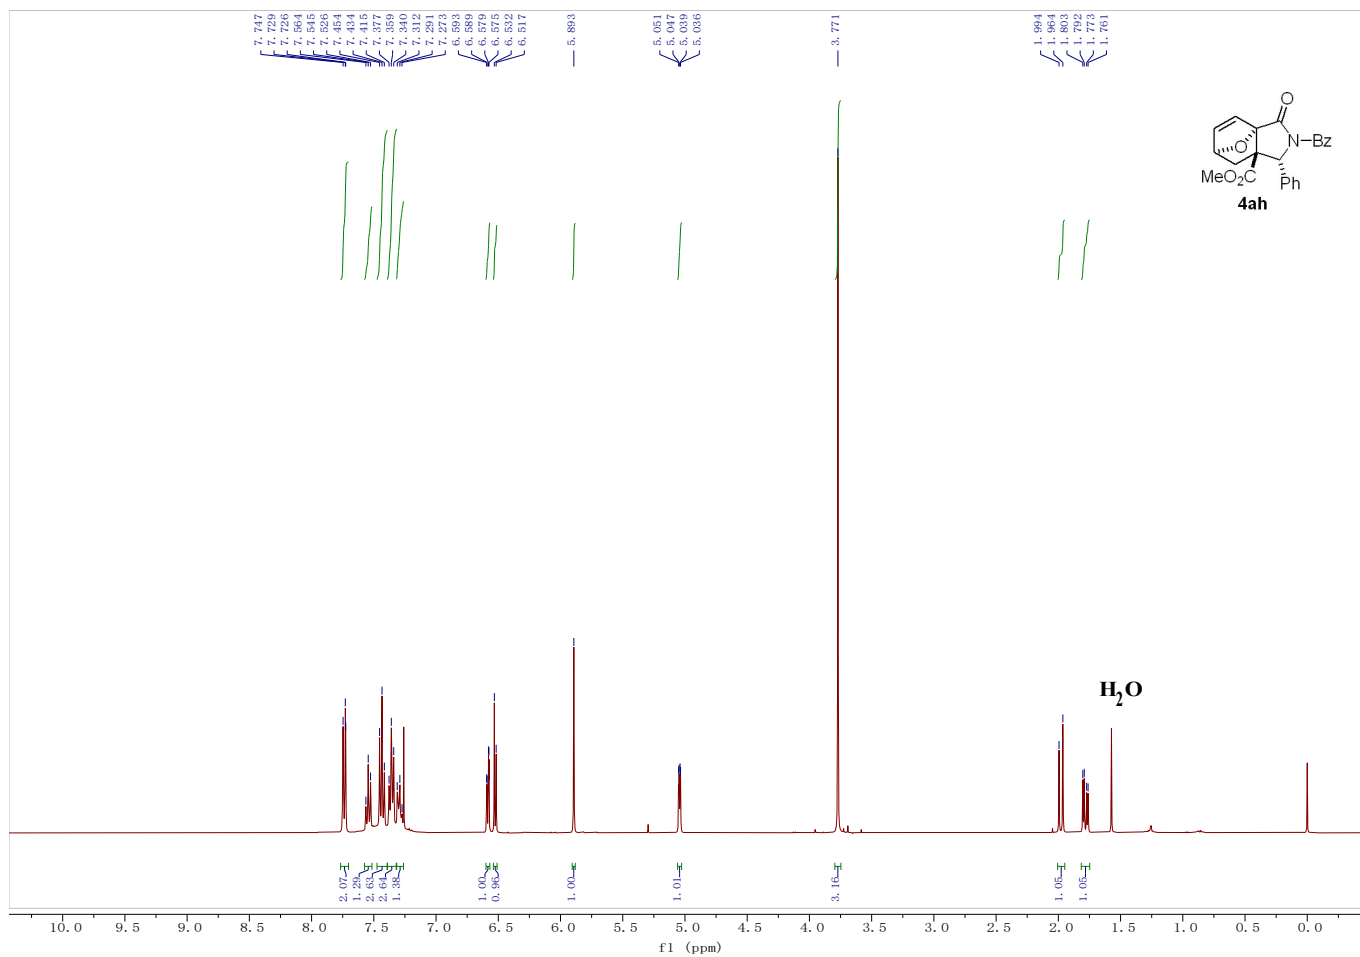

$^{13}\text{C}$  NMR (101 MHz) in  $\text{CDCl}_3$

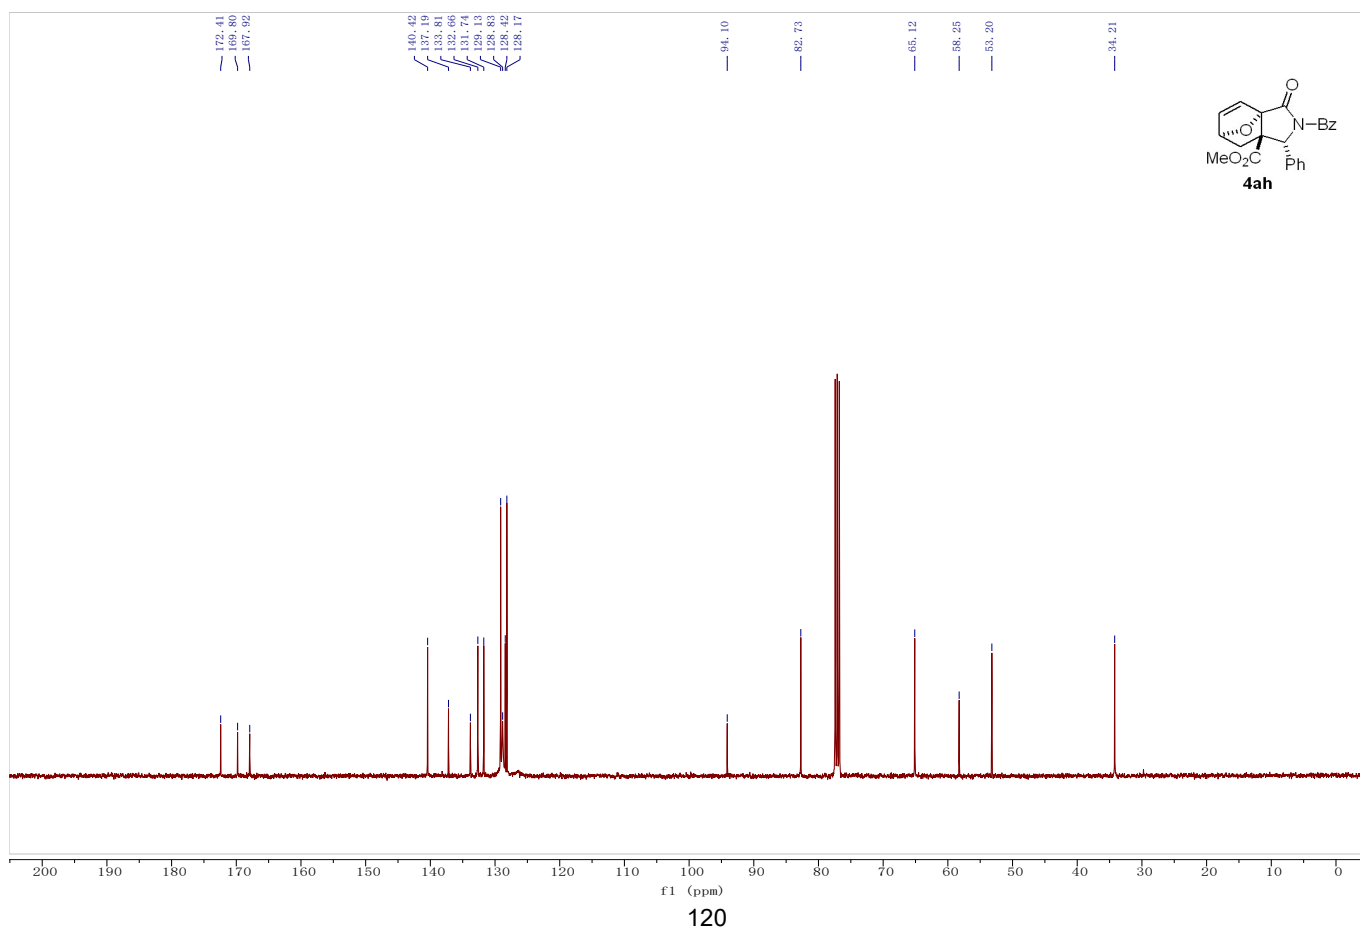

$^1\text{H}$  NMR (400 MHz) in  $\text{CDCl}_3$

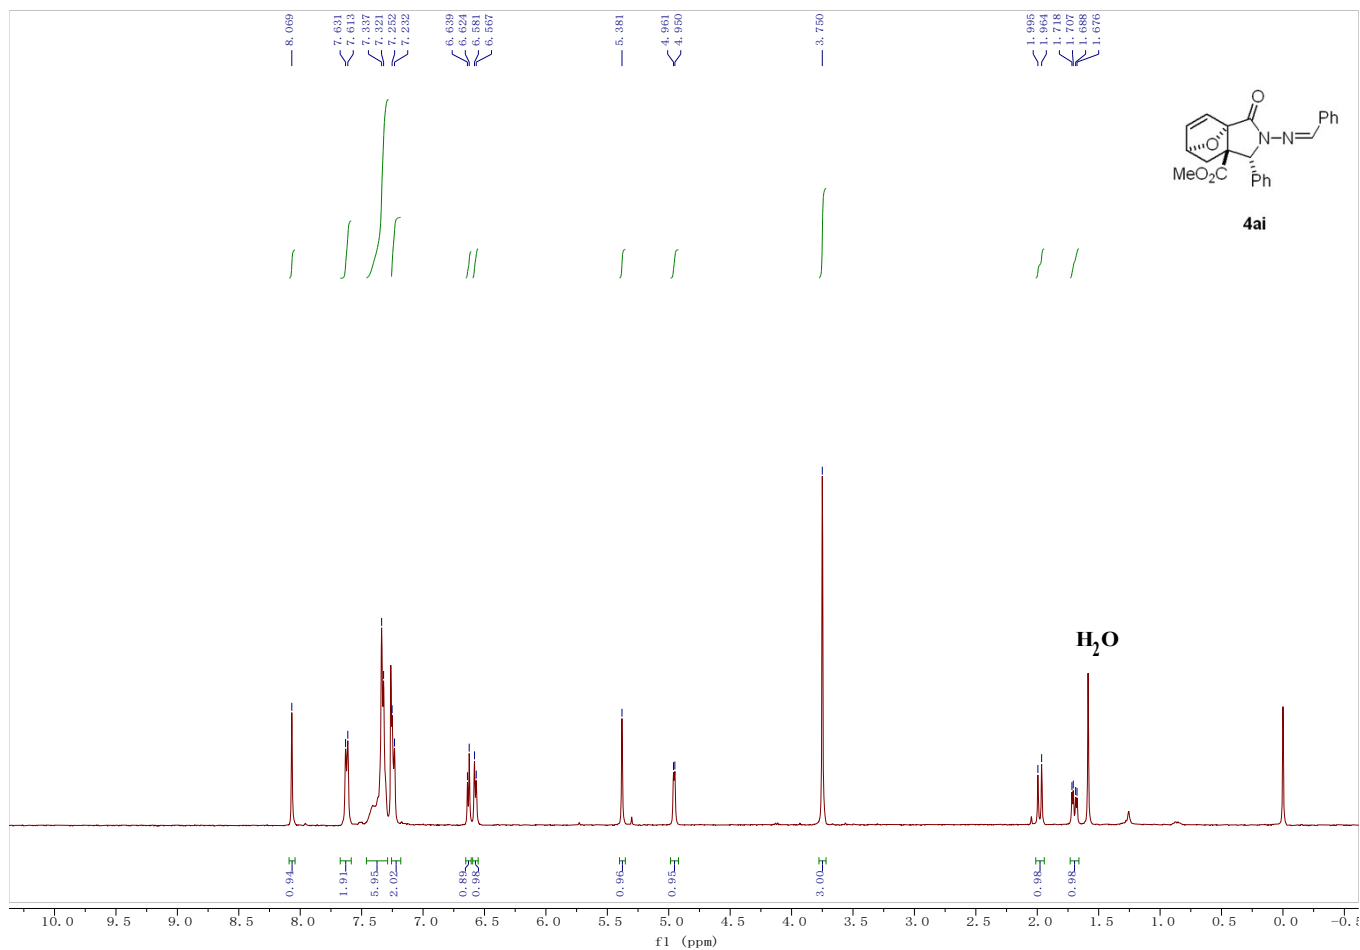

$^{13}\text{C}$  NMR (101 MHz) in  $\text{CDCl}_3$

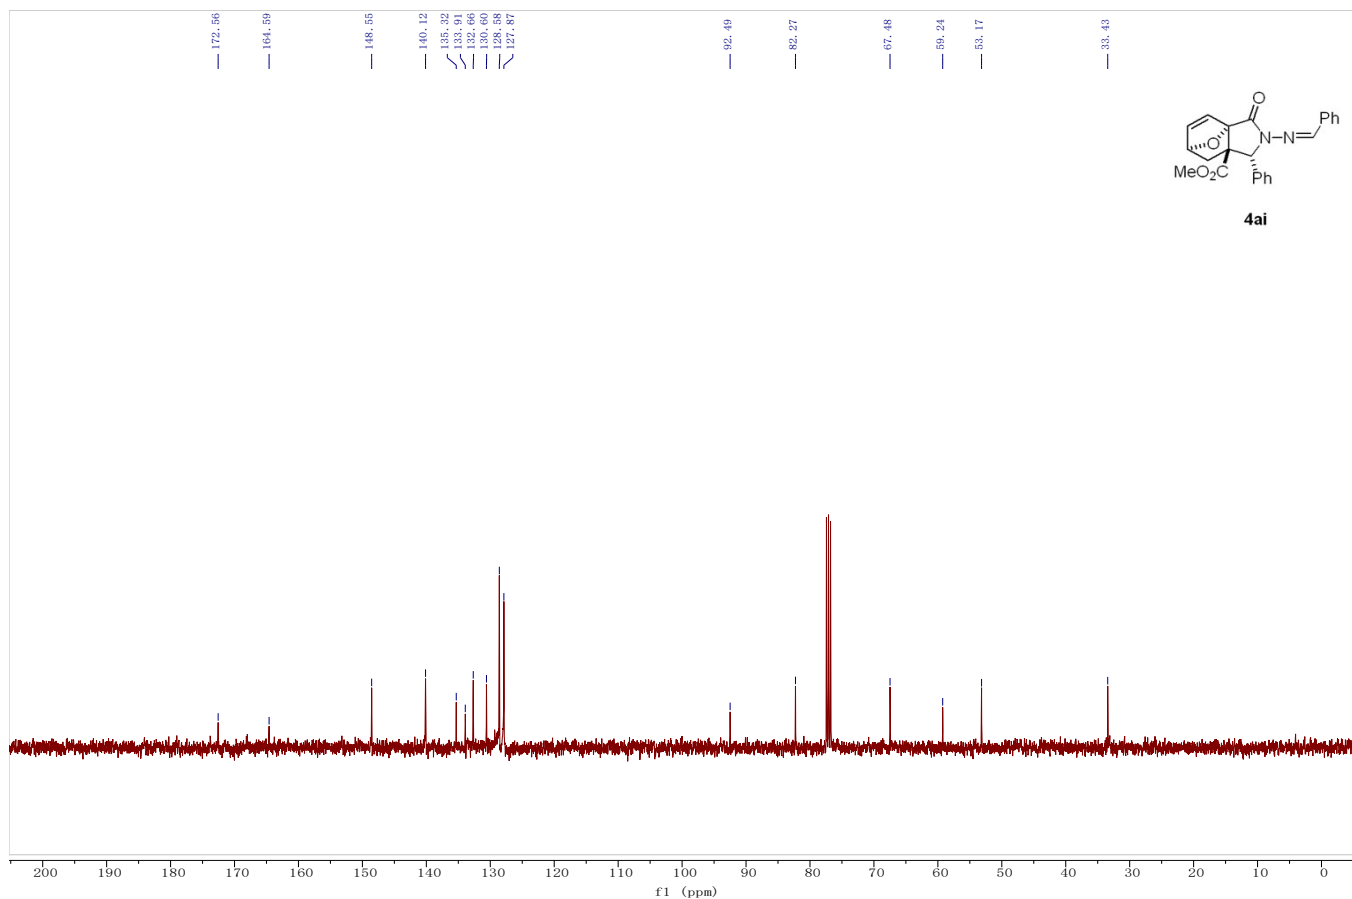

$^1\text{H}$  NMR (400 MHz) in  $\text{CDCl}_3$

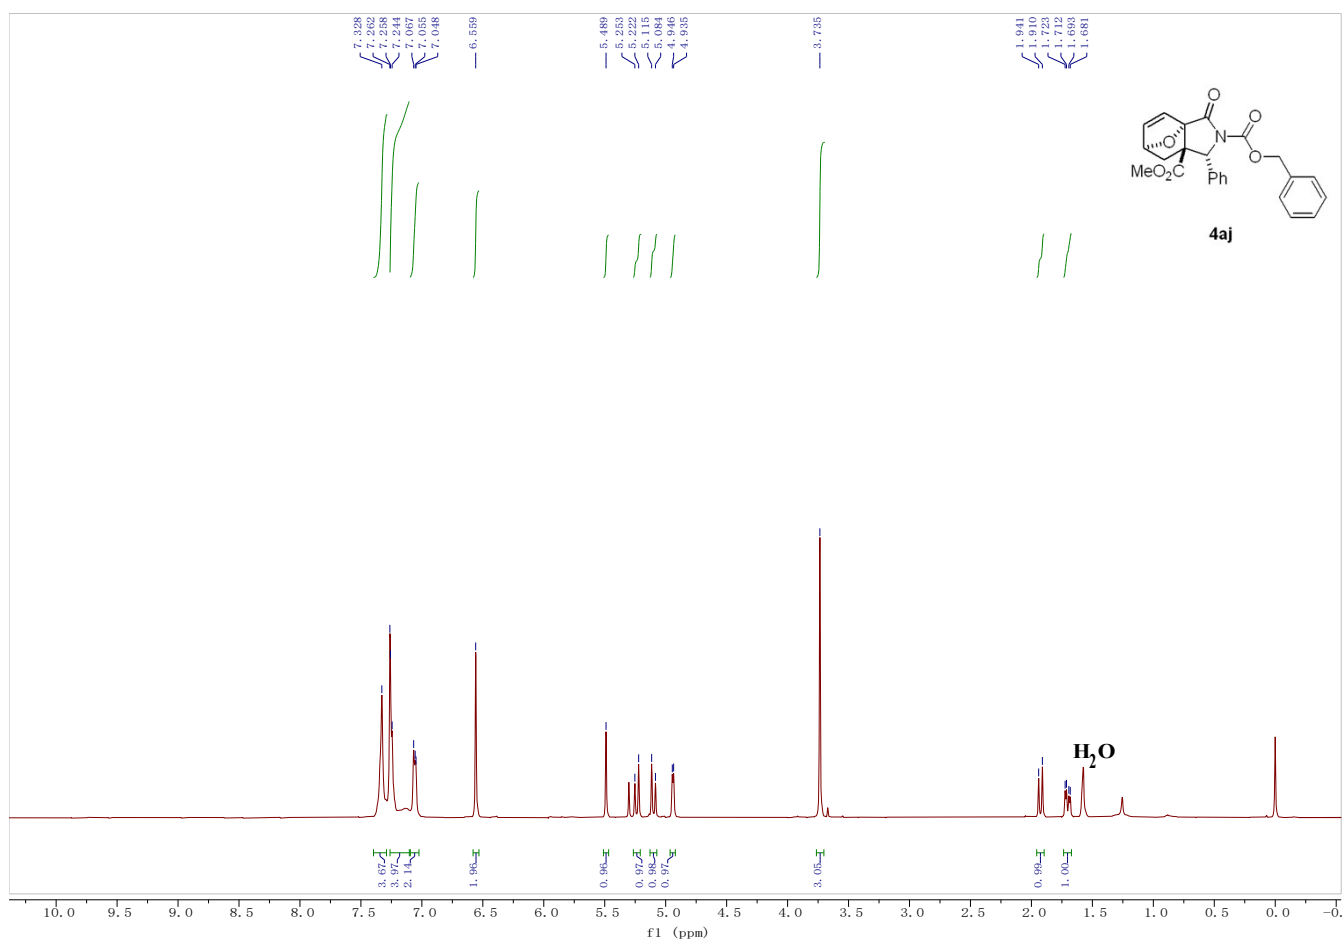

$^{13}\text{C}$  NMR (101 MHz) in  $\text{CDCl}_3$

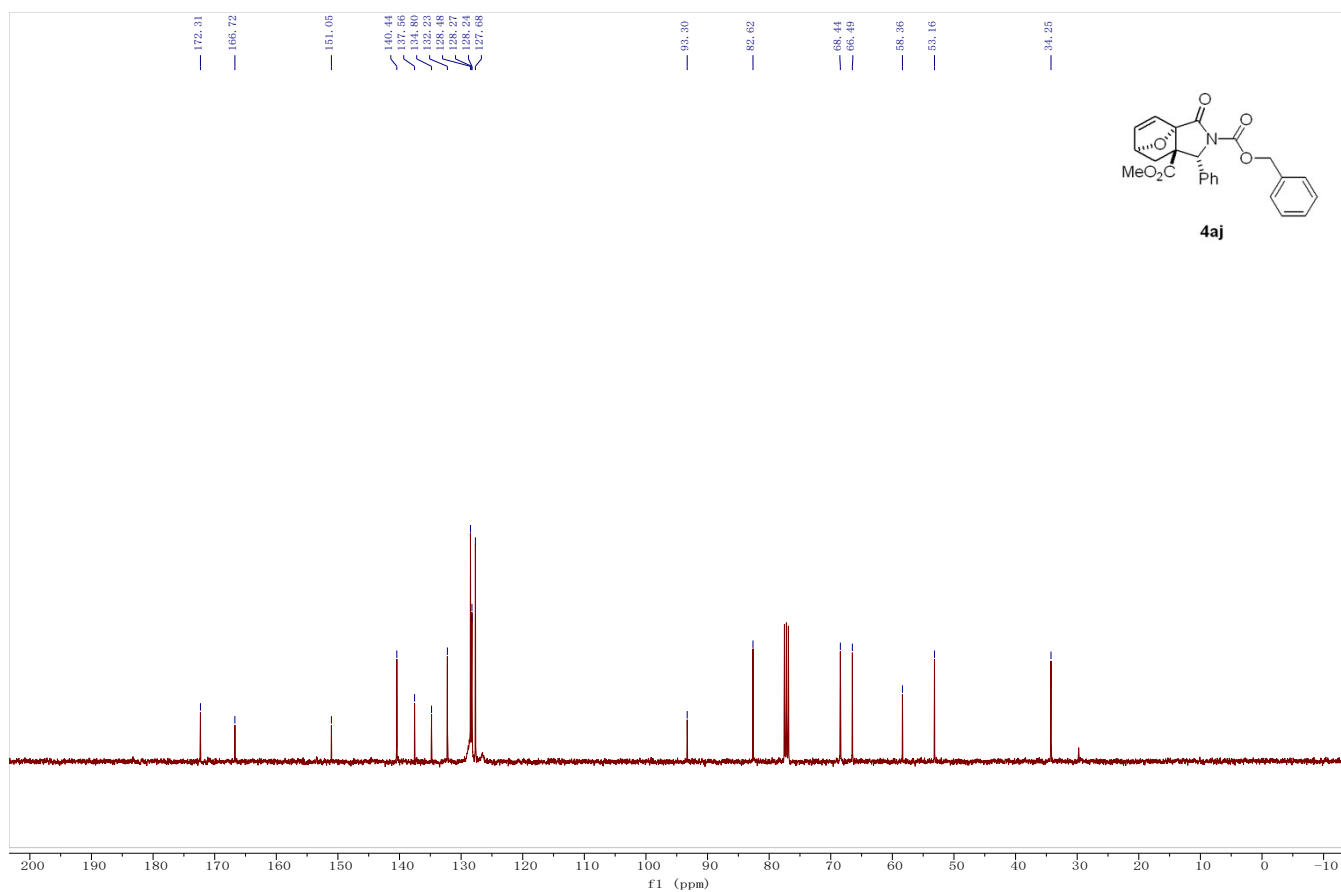

<sup>1</sup>H NMR (400 MHz) in CDCl<sub>3</sub>

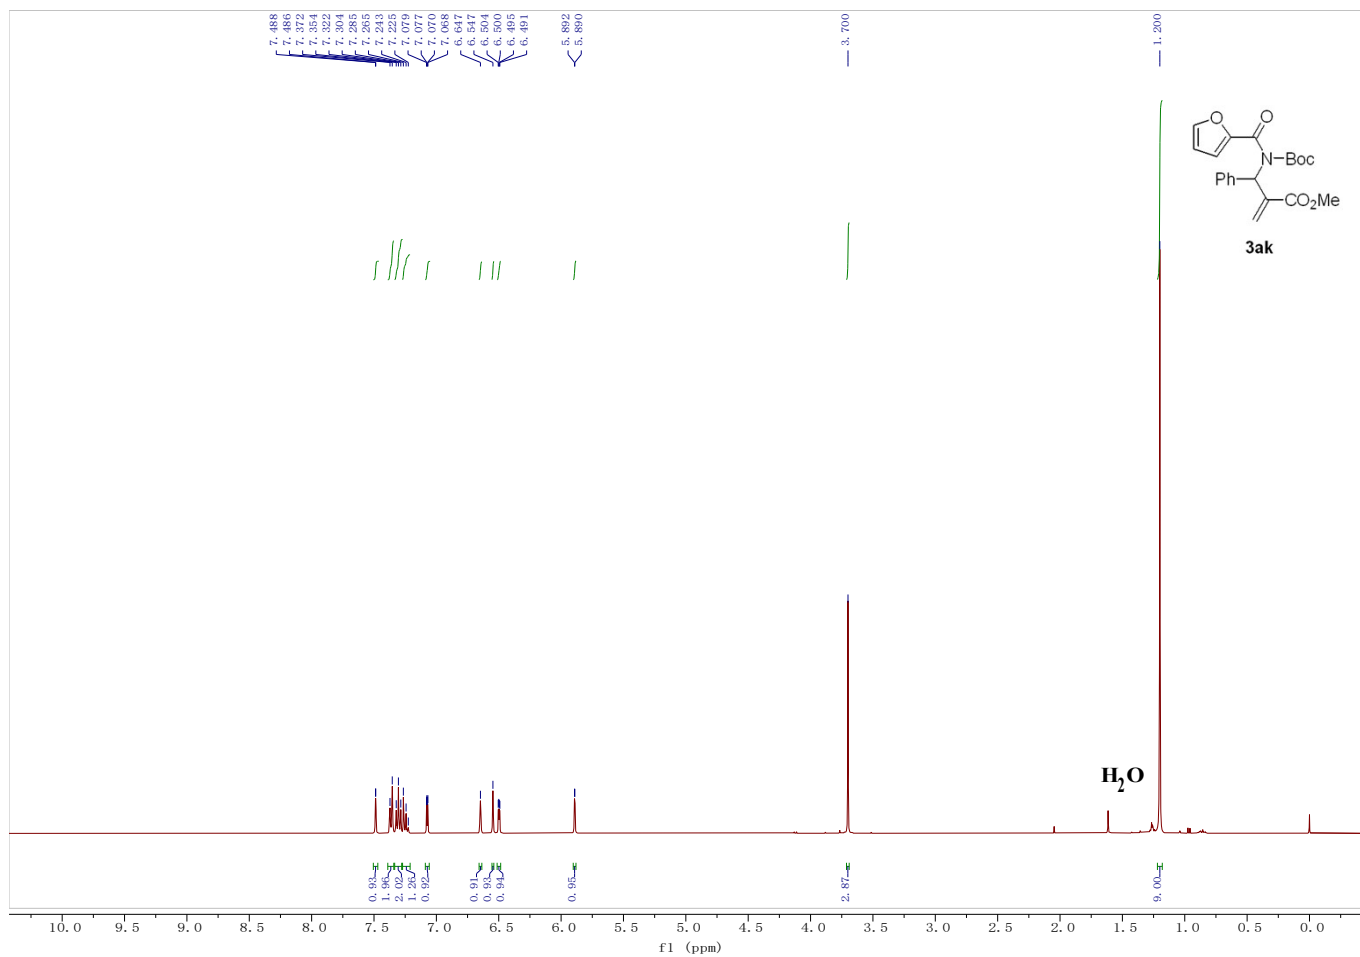

<sup>13</sup>C NMR (101 MHz) in CDCl<sub>3</sub>

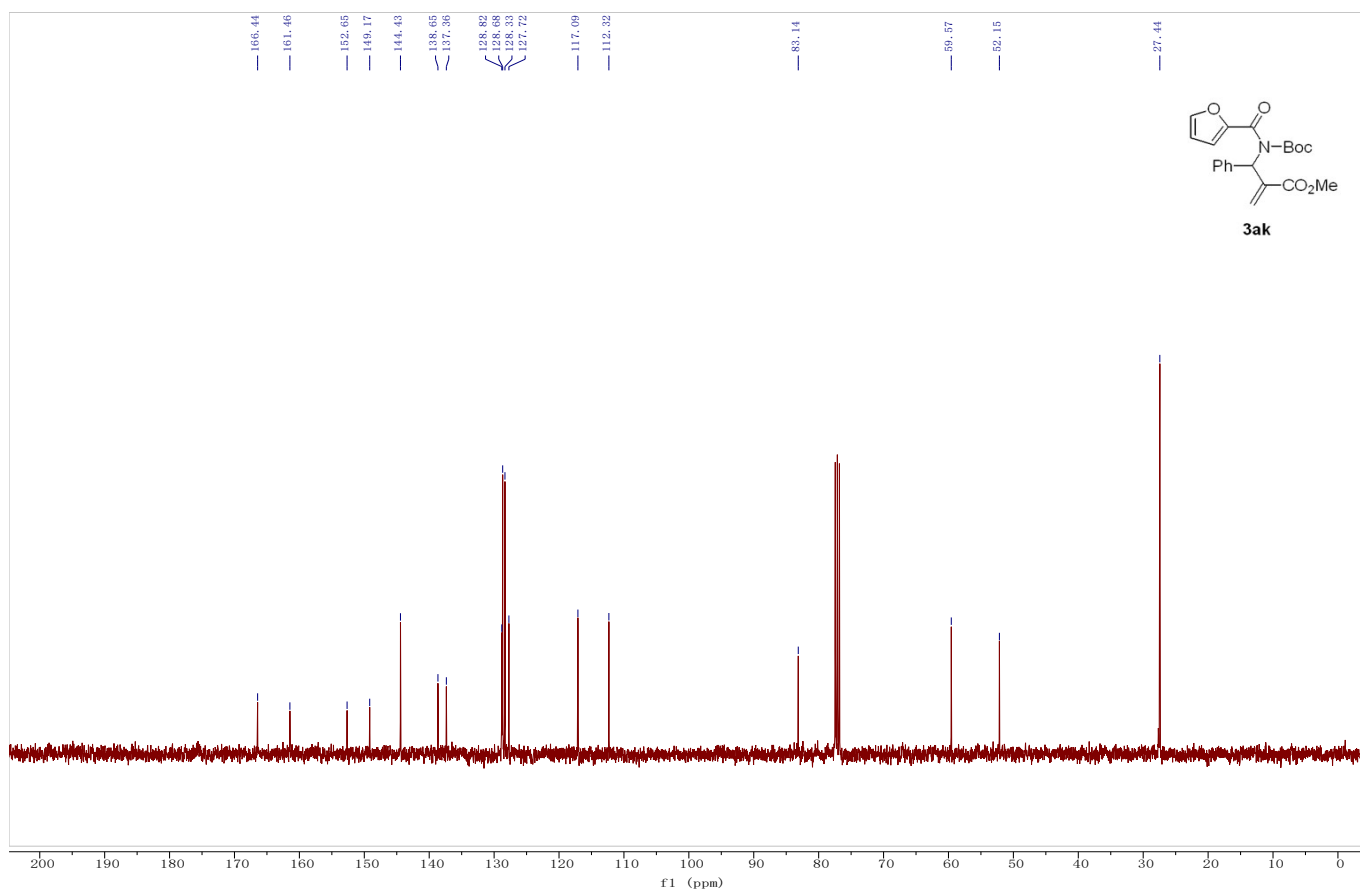

$^1\text{H}$  NMR (400 MHz) in  $\text{CDCl}_3$

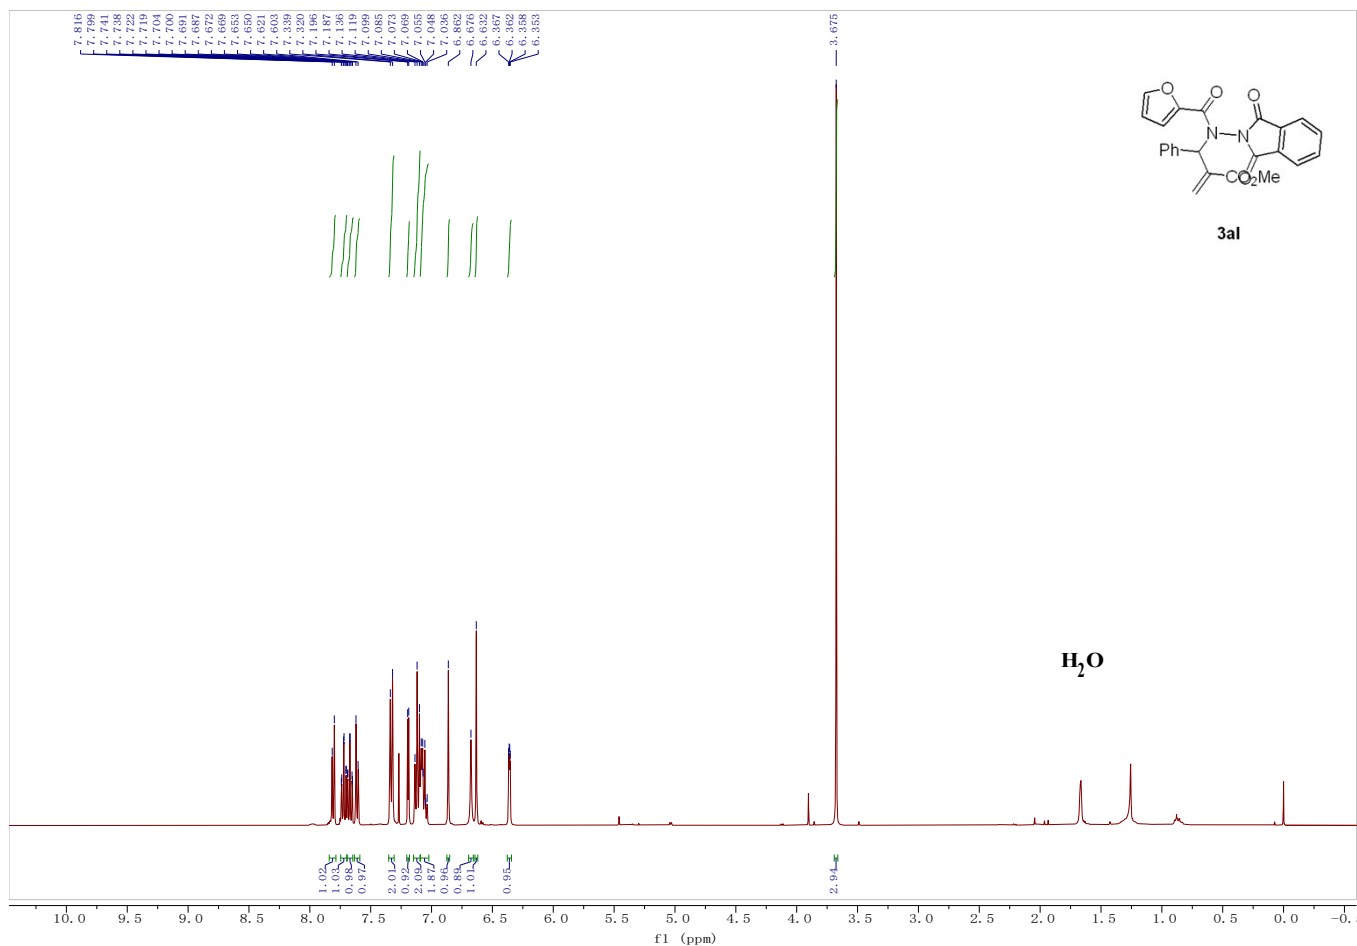

$^{13}\text{C}$  NMR (101 MHz) in  $\text{CDCl}_3$

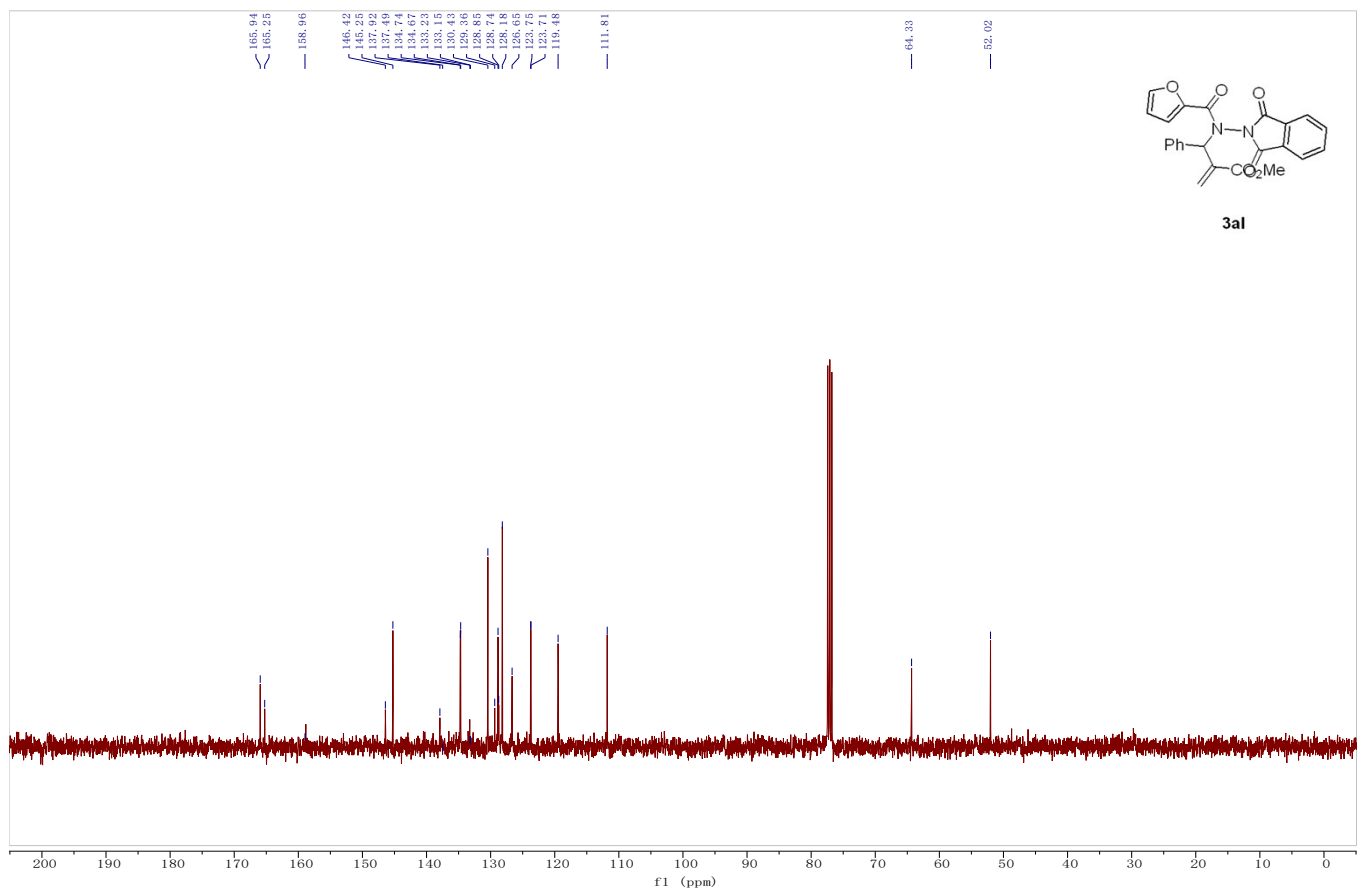

$^1\text{H}$  NMR (400 MHz) in  $\text{CDCl}_3$

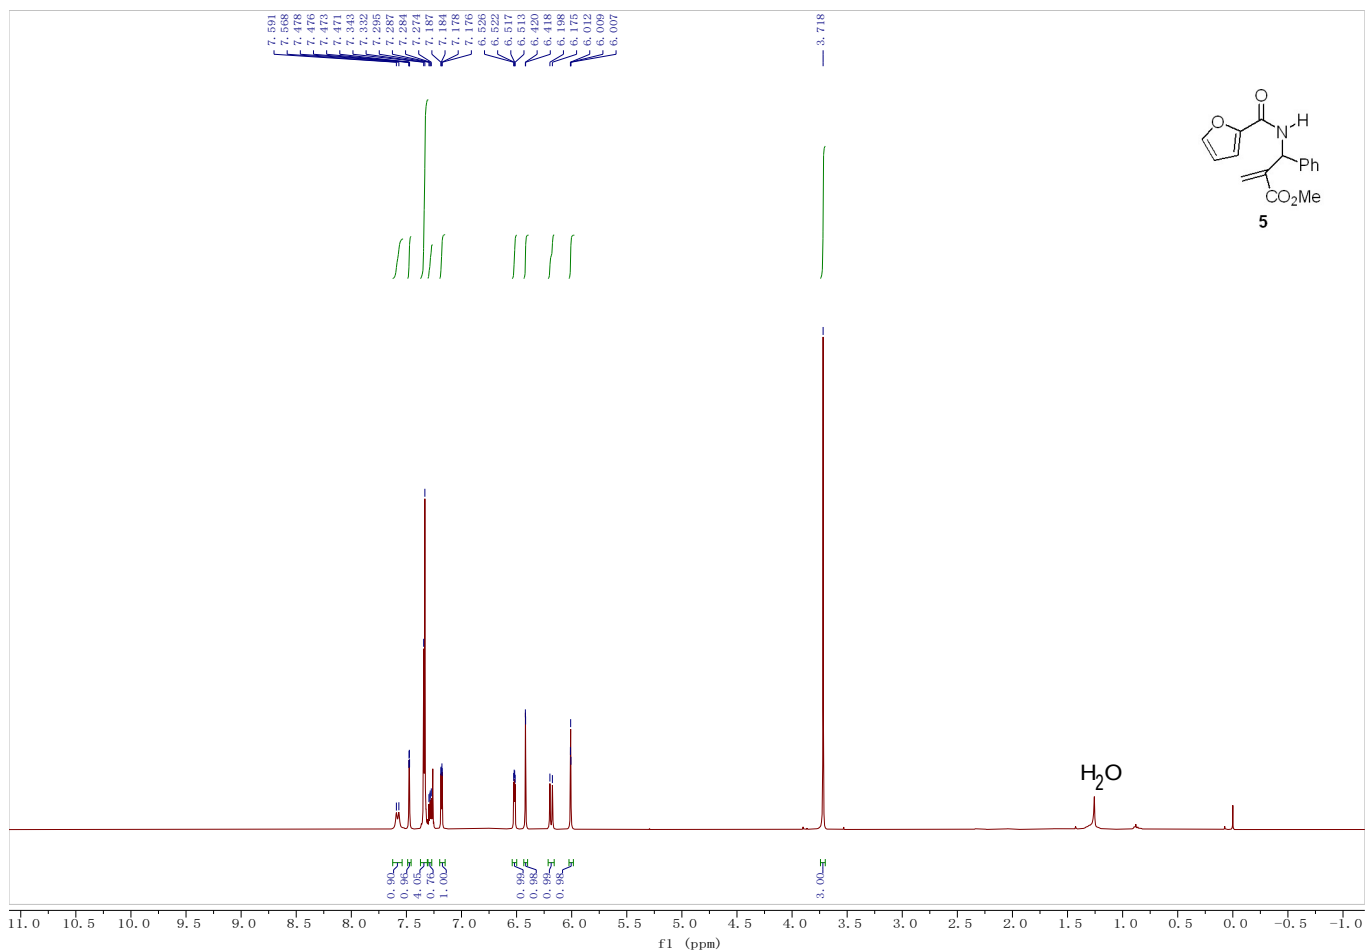

$^{13}\text{C}$  NMR (101 MHz) in  $\text{CDCl}_3$

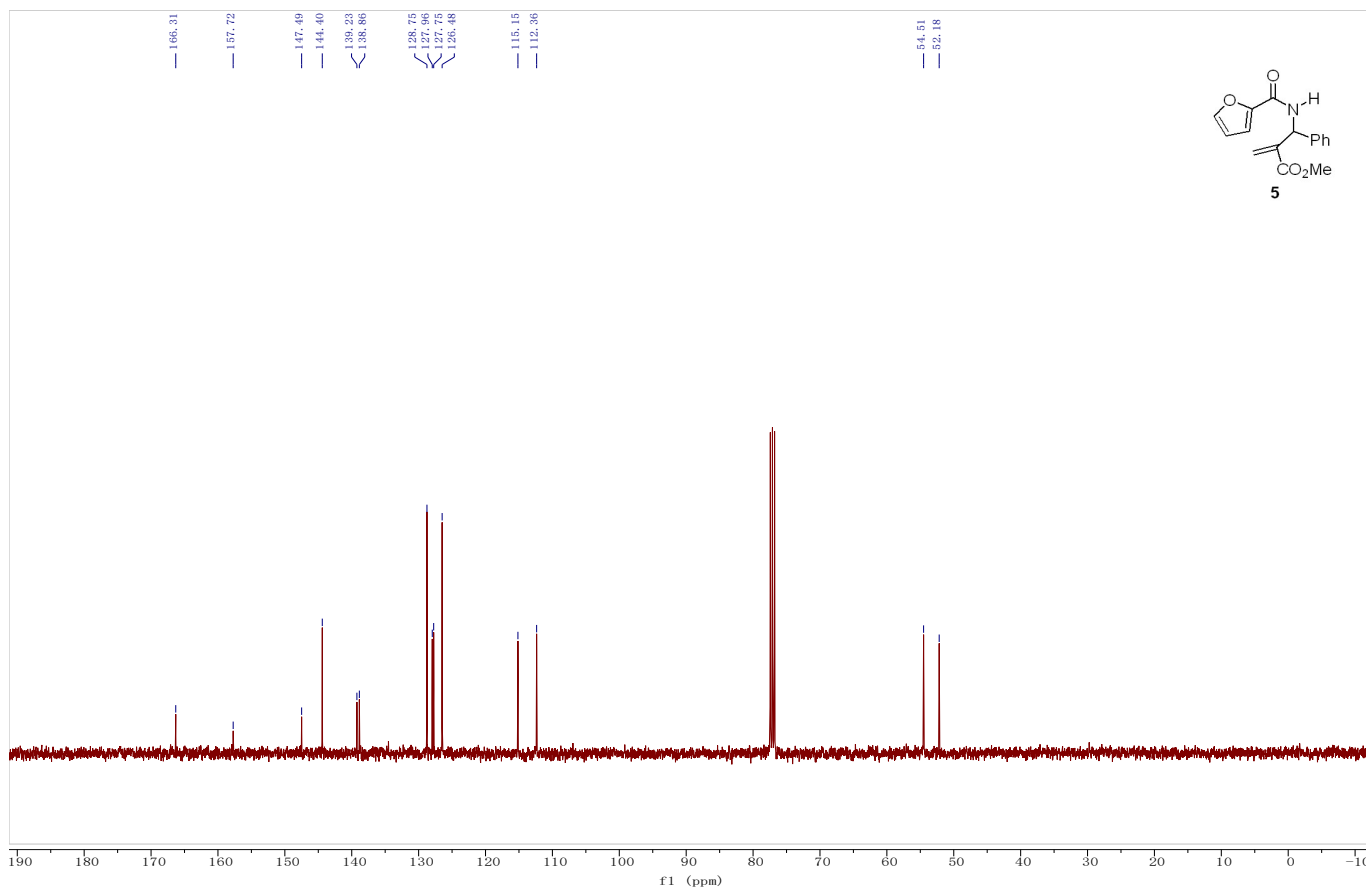

$^1\text{H}$  NMR (400 MHz) in  $\text{CDCl}_3$

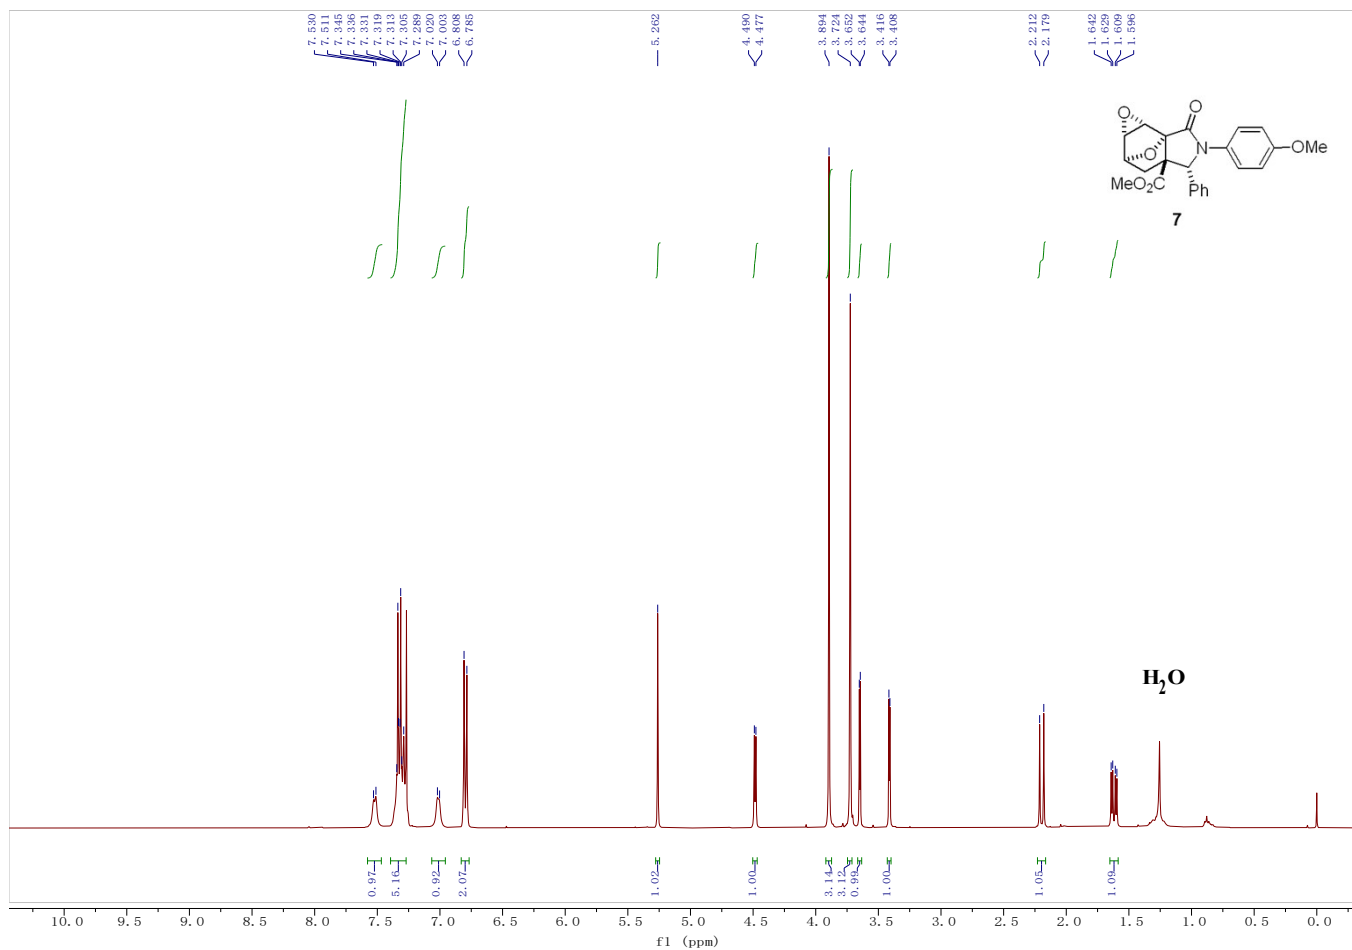

$^{13}\text{C}$  NMR (101 MHz) in  $\text{CDCl}_3$

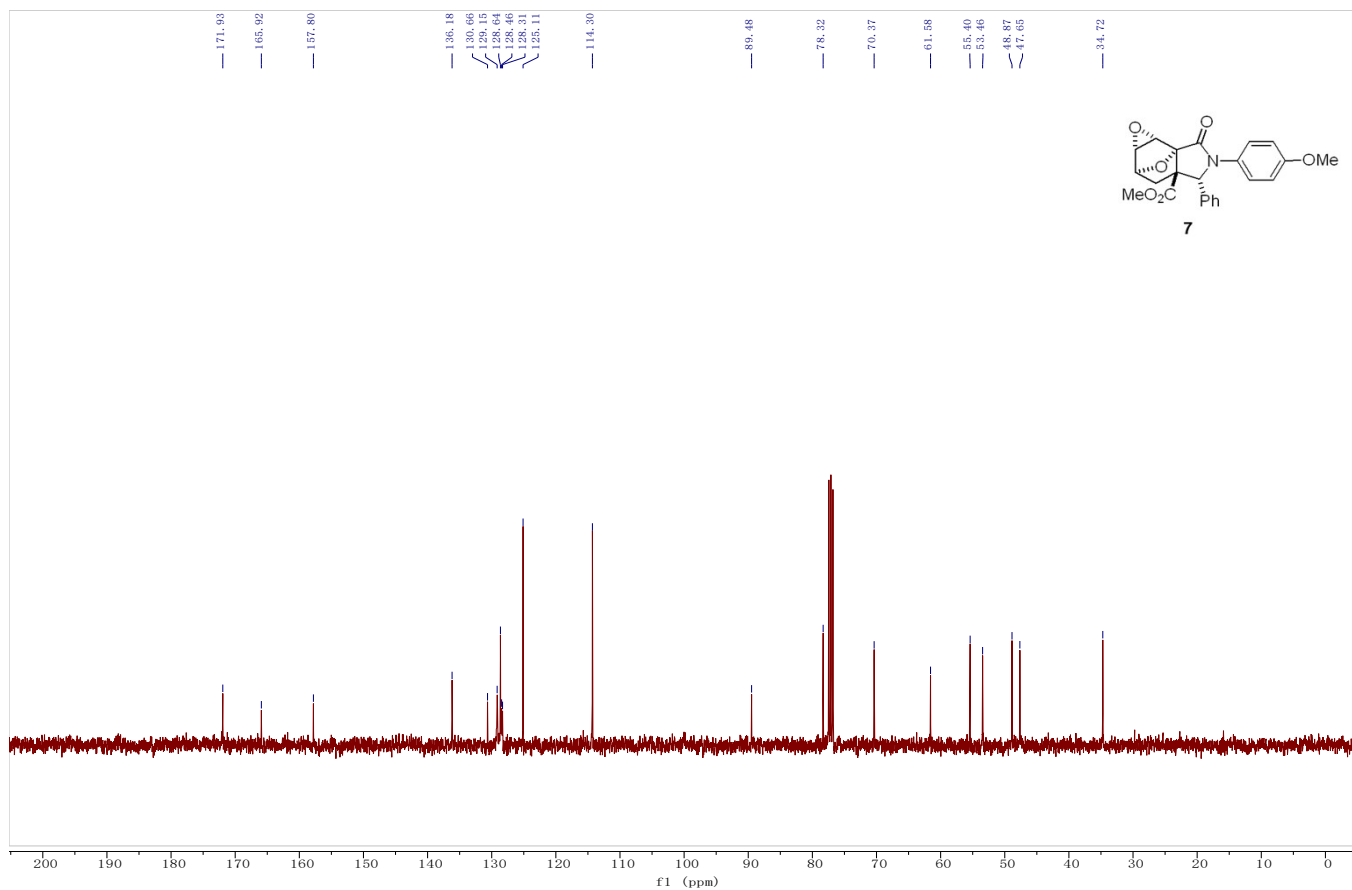

$^1\text{H}$  NMR (400 MHz) in  $\text{CDCl}_3$

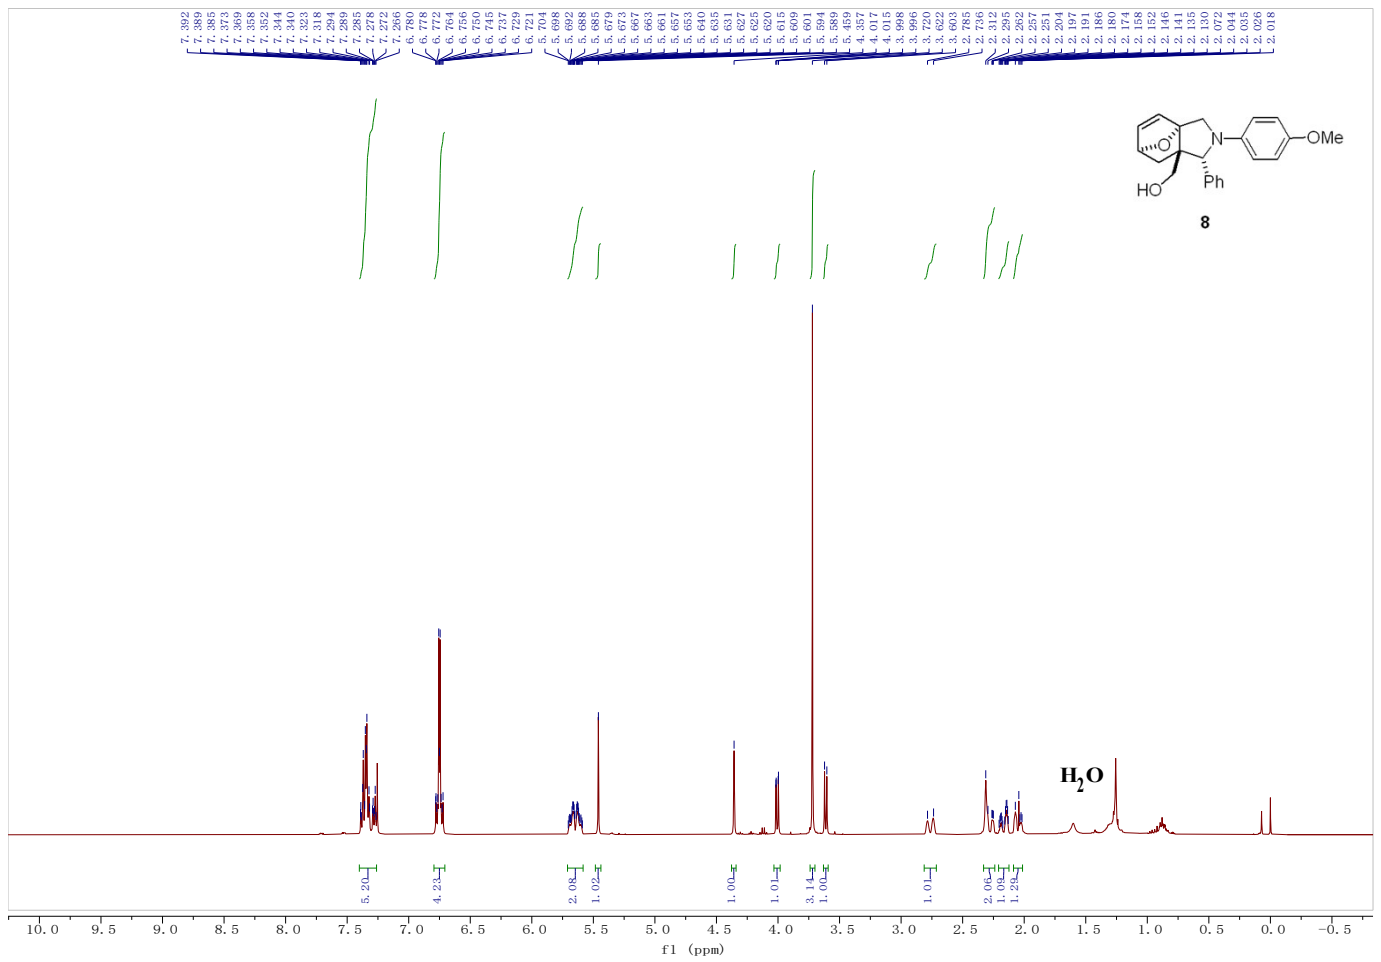

$^{13}\text{C}$  NMR (101 MHz) in  $\text{CDCl}_3$

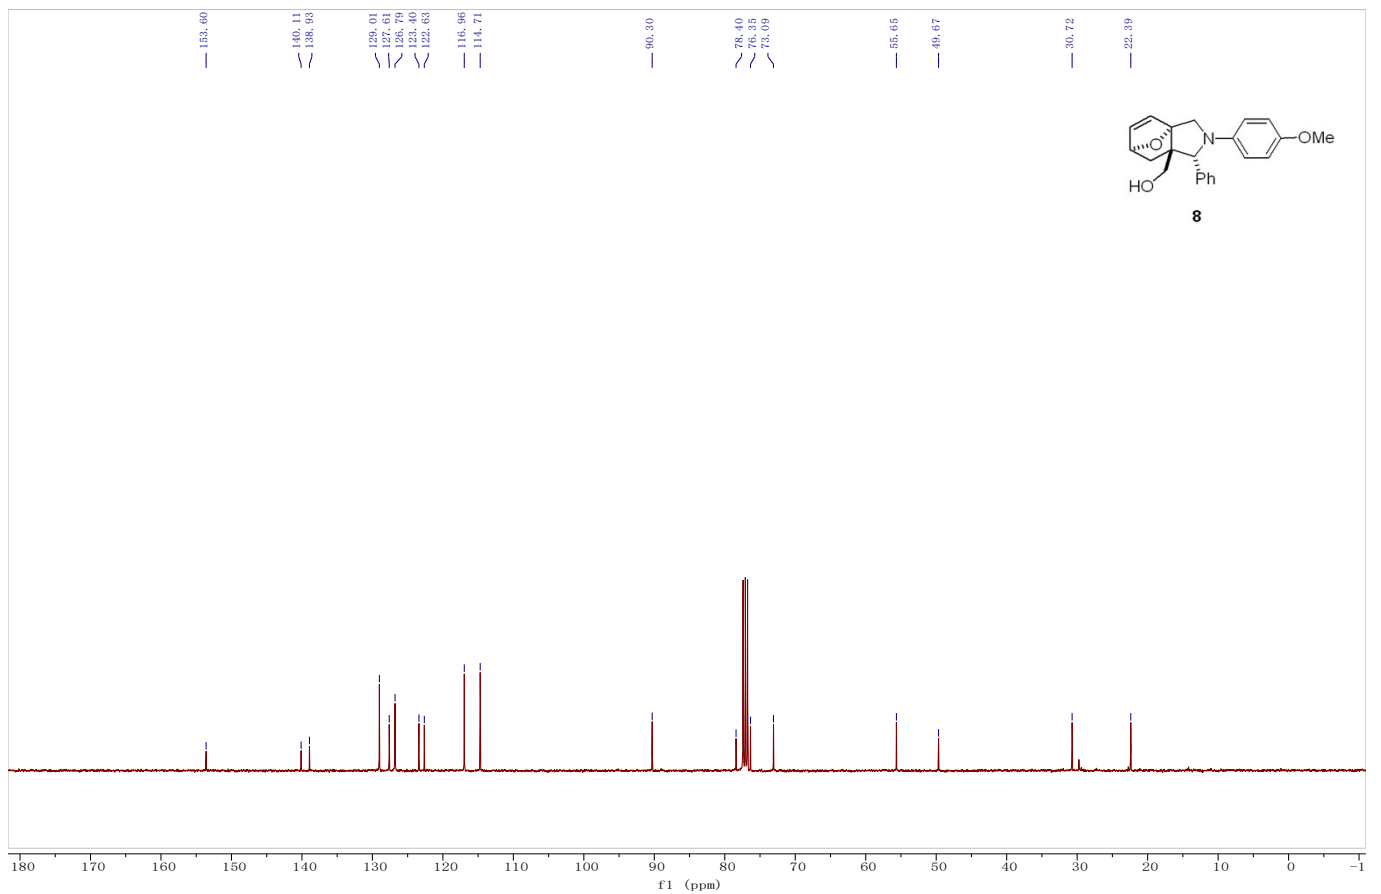

# $^1\text{H}$ NMR (400 MHz) in $\text{CDCl}_3$

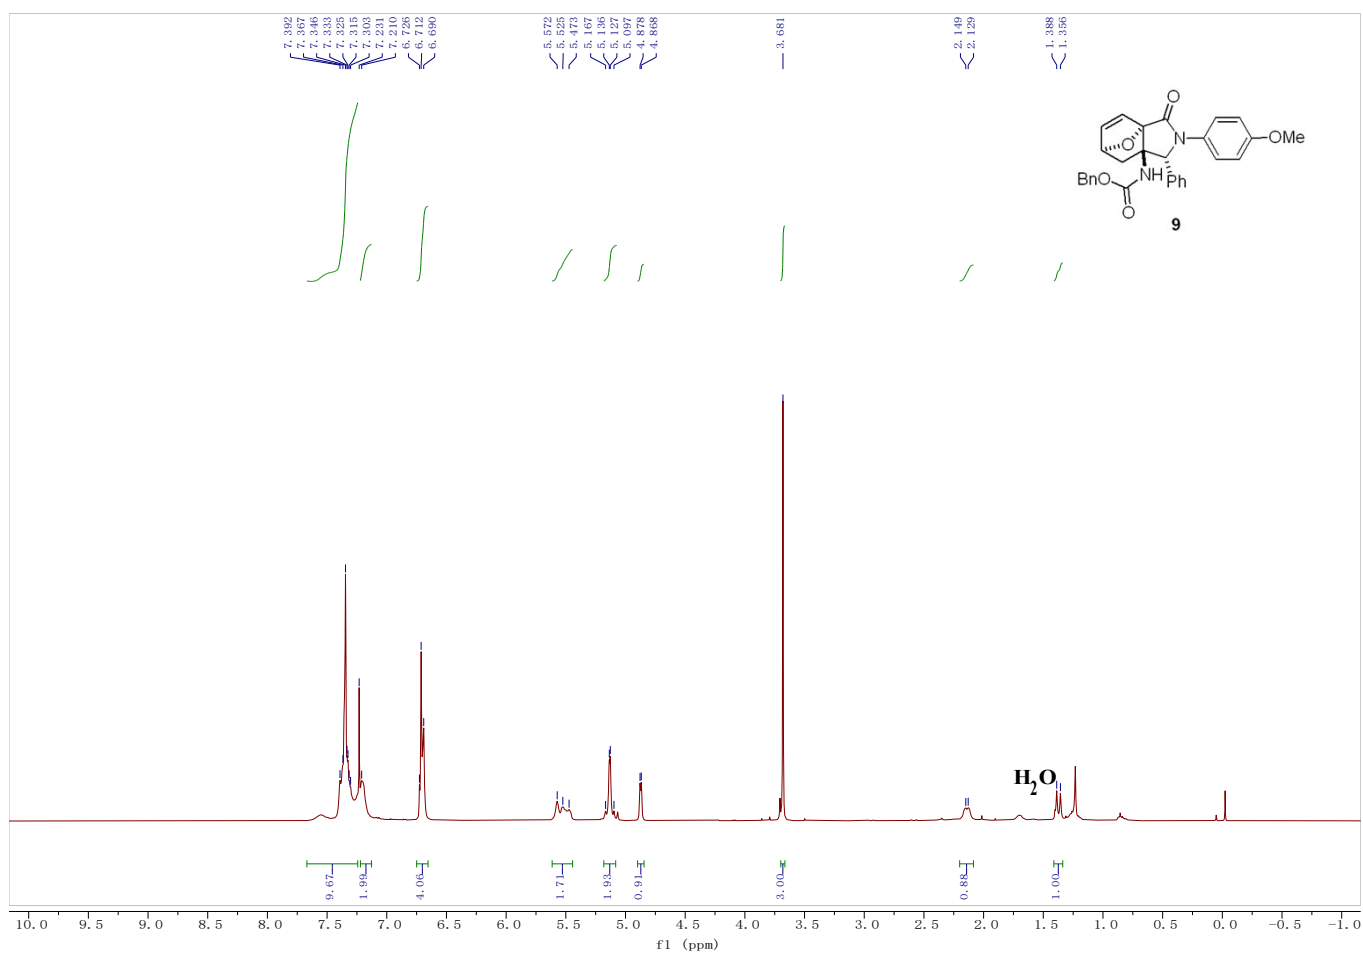

# $^{13}\text{C}$ NMR (101 MHz) in $\text{CDCl}_3$

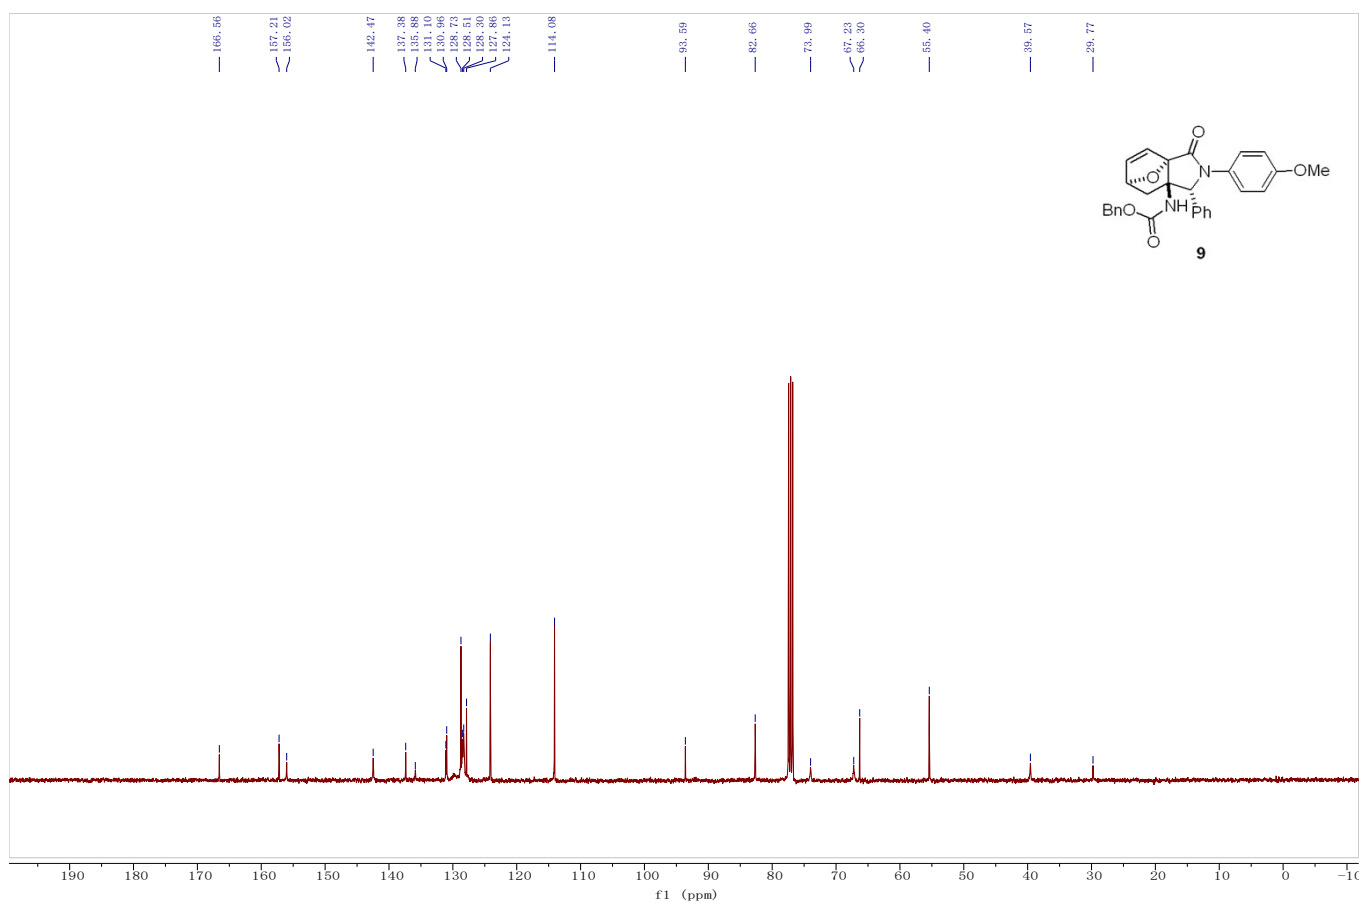

$^1\text{H}$  NMR (400 MHz) in  $\text{CDCl}_3$

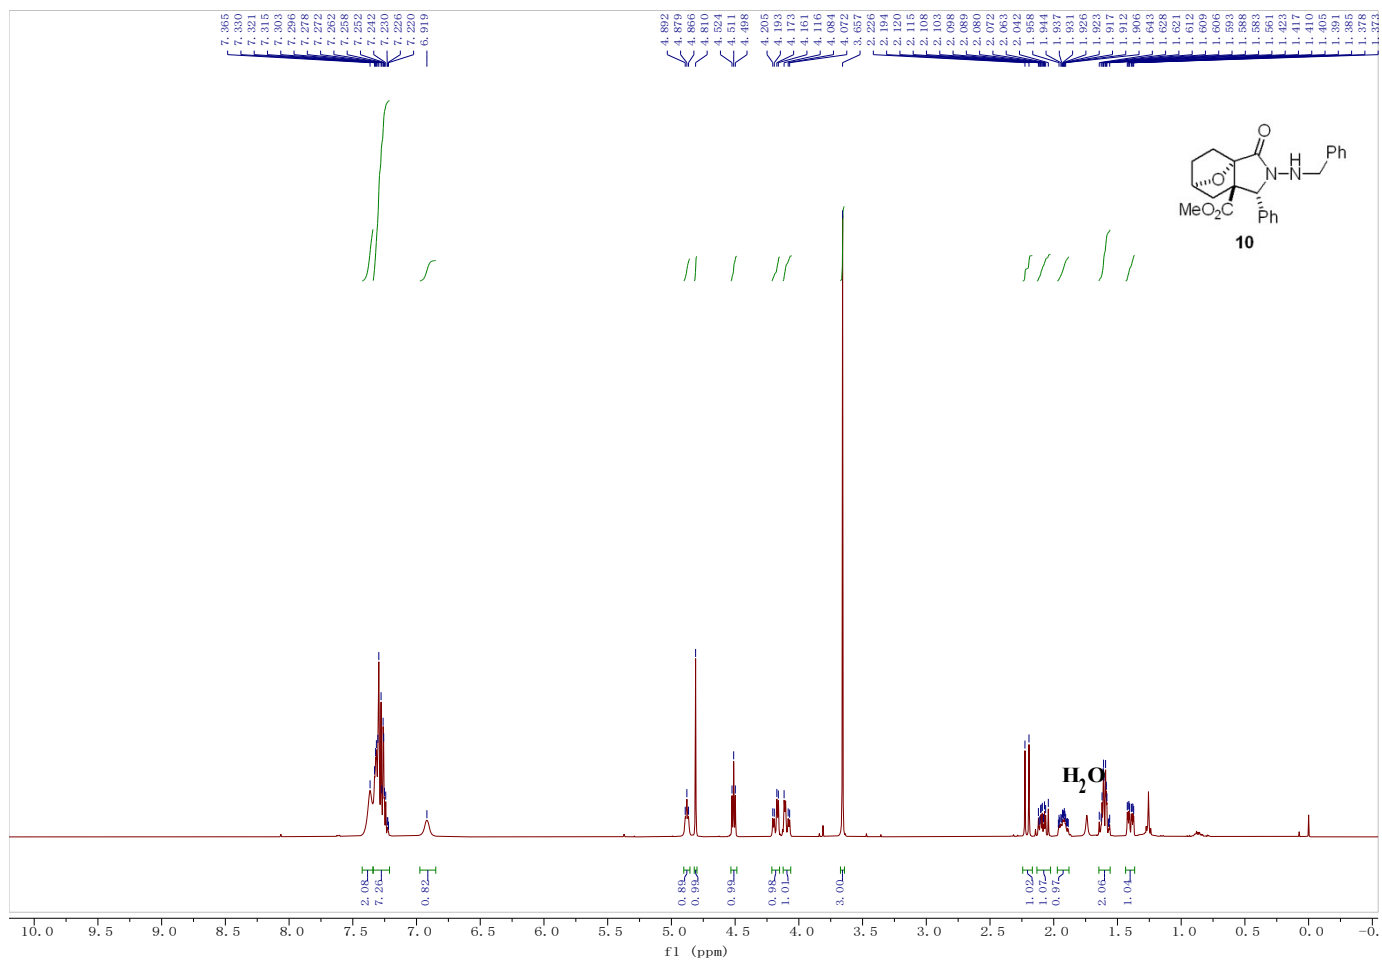

$^{13}\text{C}$  NMR (101 MHz) in  $\text{CDCl}_3$

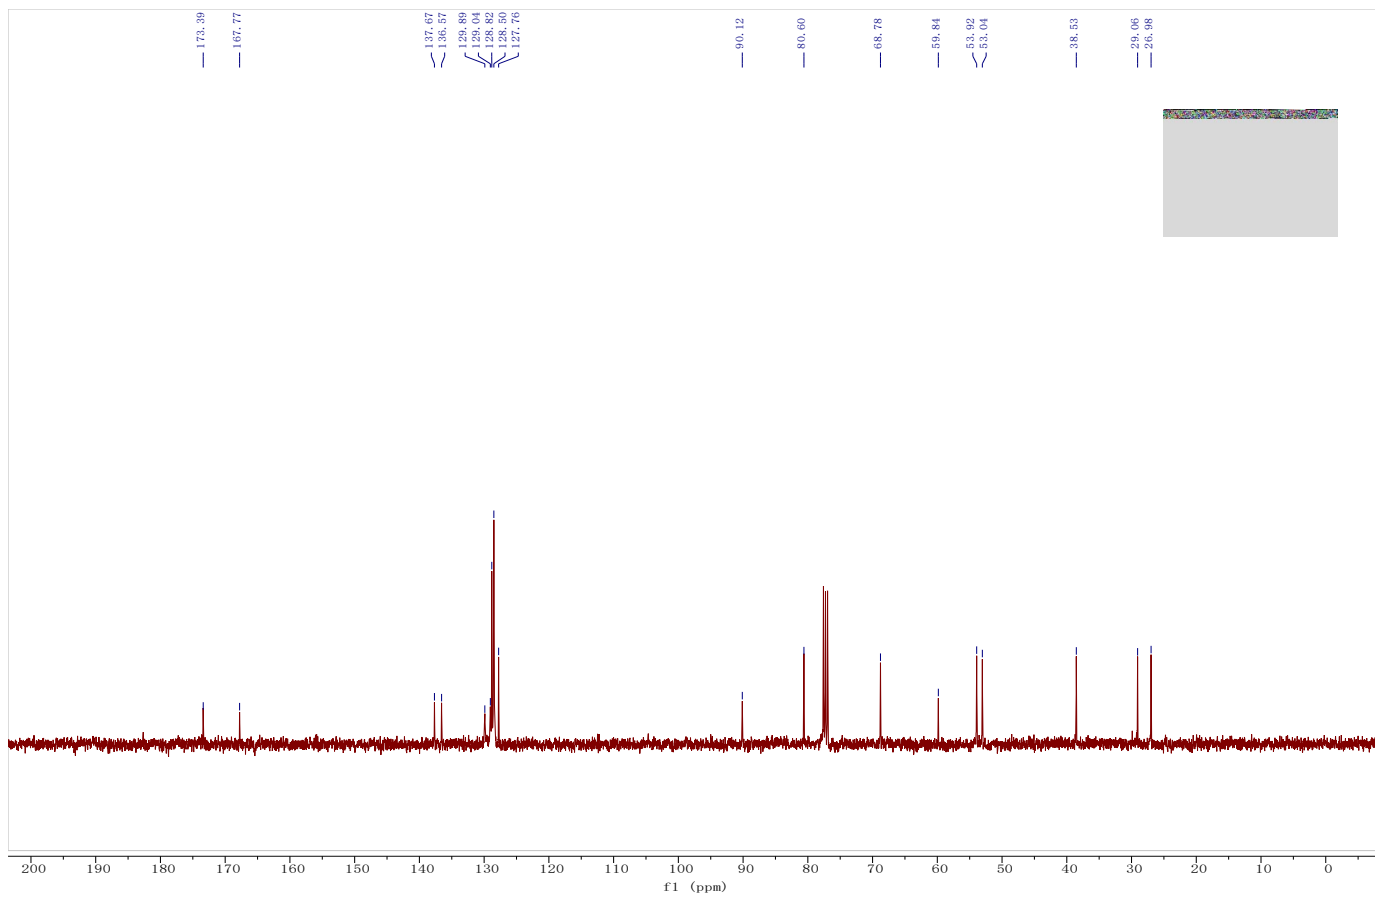

Supplement: d6ob00582a1.pdf [file d6ob00582a1.pdf]
